# Supplementary material for: PANCS-Binders: a rapid, high-throughput binder discovery platform
Source: Springer Nature journal article supplement (doi:10.1038/s41592-025-02740-0), 2025-08-01
Supplement: MOESM5 [file 41592_2025_2740_MOESM5_ESM.xlsx]

## Sheet: Figure 2
2c						2e	PANCS Titers
	Amplification Rates
RAF (WT)	3370000	333000				Passage	Affitin (SasA)			RAF (WT)			RAF (Q66A)			RAF (K84A)			RAF (R89L)
RAF (Q66A)	19.6	15.1				0	2000000000	2000000000	2000000000	2000000000	2000000000	2000000000	2000000000	2000000000	2000000000	2000000000	2000000000	2000000000	2000000000	2000000000	2000000000
RAF (K84A)	6.01	10				1	2500000000	1000000000	700000000	2500000000	1500000000	1000000000	2500000000	1500000000	1000000000	2500000000	1500000000	2000000000	2500000000	750000000	2000000000
RAF (R89L)	0.222	0.222				2	100000000	150000000	330000000	78800000	86300000	30000000	100000000	25000000	250000000	100000000	25000000	250000000	100000000	25000000	250000000
Non-Binder	0.05	0.05				3	500	6500	6500	600000	650000	62500000	1500	9000	6000	1000	20000	10000	19000	31000	30500
						4	19500	18000	12000	1250000000	1070000000	1500000000	18000	19000	52500	17000	37500	61000	11500	500	10000
							Titer in PFU/mL

## Sheet: Figure 3
3b																											3c	KRAS replicate			RAF replicate			IFNG replicate			Mdm2 recplicate
KRAS lux						RAF lux						IFNG lux						Mdm2 lux
Ab N-VCD	14.4883	12.9624	13.8408	13.9886		T-VPN	43.9923	41.8194	44.5276	47.0287		S-VVD	73.4158	85.9648	77.2559	75.7519		S-WYS	60.082	56.8325	67.8763	63.59						Biological rep 1	Biological rep 2		Biological rep 1	Biological rep 2		Biological rep 1	Biological rep 4		Biological rep 1	Biological rep 2
Template	0.777258	0.952871	1.03262	1.23725		N-LFN	31.7418	29.668	32.3621	31.0285		S-VCD	67.2066	70.2125	54.6784	71.0708		S-WFY	77.5706	75.9616	93.1589	78.8323						0.00815248	0.00903252		0.001	0.001		0.00899792	0.00293446		0.00294768	0.001
NS1 Monobody	13.0518	14.3999	17.6932	13.5446		Y-LCS	34.5664	24.9825	25.8426	27.8112		Template	0.818258	1.10044	0.973551	1.10775		S-WYS	51.212	30.9832	38.904	41.176						0.00219208	0.001		0.00266786	0.001		0.001	0.00293446		0.001	0.00279459
						Template	0.85086	0.861657	0.9596	1.32788								T-WDN	51.1547	56.3433	45.6187	56.545						0.00219208	0.001		0.001	0.001		0.001	0.001		0.001	0.001
						Z(RAF322)	41.3753	42.0582	38.2771	52.2433								Template	1.01585	0.998518	0.997677	0.987957						0.00219208	0.001		0.0693823	0.119629		0.001	0.00293446		0.001	0.001
																		Cl-2 Binder	45.3679	86.4638	66.8565	90.0909
																												0.00219208	0.001		0.001	0.001		0.001	0.00293446		0.00294768	0.001
KRAS sequence info						Raf sequence info						IFNG sequence info						Mdm2 sequence info										0.00219208	0.001		0.0343572	0.0301369		0.001	0.00293446		0.001	0.001
Ranking KRAS	Percentage KRAS	Frequency KRAS	Translation KRAS			Ranking RAF	Percentage RAF	Frequency RAF	Translation RAF			Ranking IFNG_1	Percentage IFNG_1	Frequency IFNG_1	Translation IFNG_1			Ranking MDM2	Percentage MDM2	Frequency MDM2	Translation MDM2							0.00219208	0.001		0.001	0.001		0.001	0.001		0.001	0.001
1	0.00119208	1	VDNKYNKEWCTASIQIYVLPNLNASQRTAFIDSLAN			1	0.000833931	1	VDNKFNKELFNAAFEIVSLPNLNLSQERAFIISLNN			1	0.00199948	1	VDNKLSKEVVDATIEIHYLPNLNRDQKCAFIFSLFD			1	0.00194769	1	VDNKRIALCIQ*DY*SAELKPAPGTRLHLQPD*							0.001	0.00581951		0.001	0.001		0.00299948	0.001		0.001	0.001
2	0.00119208	1	VDNKCNKEVCDAYAQIGNLPNLNVYQIVAFIRSLDN			2	0.000833931	1	VDNKFKKELFNAAFEIVSLPNLNLSQERAFIISLNN			2	0.00199948	1	VDNKSSKEVVDATIEIHFLPNLNDAQRIAFIFSLFD			2	0.00194769	1	VDNKI*QRMG*CNFPN*HSAELKRDSGECLRRQPVQ							0.00219208	0.001		0.00266786	0.001		0.001	0.0377547		0.001	0.001
3	0.00119208	1	VDNKLNKEVCDAYAQIGNLPNLNVYQIVAFIRSLDN			3	0.000833931	1	VDNKFKKELFNAAFEIVSLPNLNDYQVLAFLHSLRD			3	0.00199948	1	VDNKFKKEVCDAYAQIGNLPNLNVYQIVAFIRSLDN			3	0.00194769	1	VDNKLYKEWAAAAIQICGLPNLNPFQKPAFVLSLAD							0.001	0.0026065		0.001	0.001		0.001	0.001		0.001	0.001
4	0.00119208	1	VDNKLIKKGITHLLRFSLCRT*TCVRELPSSSACVM			4	0.000833931	1	VDNKFNKEPRAARLEITVLPNLNREQGGAFIVSLWD			4	0.00199948	1	VDNKFNKEVCDAYAQIGNLPNLNVYQIVAFIRSLDN			4	0.00194769	1	VDNKLYKEWCAASSEIVCQTRTR*TPSSLA*MT							0.001	0.0026065		0.001	0.001		0.001	0.00293446		0.001	0.001
5	0.00119208	1	VDNKLMVRRSW*DLQSAELKRRSEARLPSQPGR			5	0.000833931	1	VDNKFNKEVPNASDQIFLLPNLNDYQVLAFLHSLRD			5	0.00199948	1	VDNKFNKEVCDAIHEIHFLPNLNPSQRLAFIFSLFD			5	0.00194769	1	VDNKLSKEWDAAVVEIVALPNLNVYQMRAFVSSLPN							0.001	0.0026065		0.001	0.00308121		0.001	0.001		0.001	0.001
6	0.00119208	1	VDNKFNKGVCDAYAQIGNLPNLNVYQIVAFIRSLDN			6	0.000833931	1	VDNKFNKEVPNASDQIFLLPNLNDYQVLAFIISLRD			6	0.00199948	1	VDNKFNKEVCDAIHEIHFLPNLNDAQRIAFIFSLHN			6	0.00194769	1	VDNKVTKEWAYAVSQILCLPNLNHDQESAFVVSLGD							0.001	0.0026065		0.001	0.00308121		0.001	0.001		0.001	0.001
7	0.00119208	1	VDNKFNKKVCDAYAQIGNLPNLNVYQIVAFIRSLDN			7	0.000833931	1	VDNKFNKEVPNASDQIFLLPNLNDYQVLAFLHSMRD			7	0.00199948	1	VDNKFNKEVCDAYAQIGNLPNLNVYQIVAFIRSLDN			7	0.00194769	1	VDNK*VFYAIDEIFRLPNLNEVQLDAFVVSLSD							0.001	0.0026065		0.001	0.001		0.001	0.001		0.001	0.001
8	0.00119208	1	VDNKFNKEMCDAYAQIGNLPNLNVYQIVAFIRSLDN			8	0.000833931	1	VDNKFNKEVPNASDQIFLLPNLNDYQVLAFLHSLRD			8	0.00199948	1	VDNKFNKEVCDAYAQIGNLQNLNVYQIVAFIRSLDN			8	0.00194769	1	VDNKSNKEWDNAVLEILCLPNLNGHQRMCLRQQPV*							0.00219208	0.001		0.001	0.00308121		0.001	0.001		0.001	0.001
9	0.00119208	1	VDNKFNKEPRAARLEITVLPNLNREQGGAFIVSLRD			9	0.000833931	1	VDNKFNKEVPNASDQIFLLPNLNDYQVLAFLHSLLD			9	0.00199948	1	VDNKFNKEVCDAYAQIGNLPNLNDAQRIAFIFSLFD			9	0.00194769	1	VDNKSIQPE*							0.00219208	0.001		0.0393608	0.0634363		0.001	0.001		0.001	0.001
10	0.00119208	1	VDNKFNKEPRAARLEITVLPNLNREQGGAFIVSLWD			10	0.000833931	1	VDNKFNKEVPNASDQIFLLPNLNDYHVLAFLHSLRD			10	0.00199948	1	VDNKFNKEVCDAYAQIGNLPNLNDYQRVAFIFSLFD			10	0.00194769	1	VDNKSYKEWTYAVLQIVDLPNLNGRQGGAFVPSLPD							0.001	0.0026065		0.001	0.001		0.001	0.001		0.001	0.001
11	0.00119208	1	VDNKFNKEPRAARLEITVLPNLNARQKPAFLVSLCD			11	0.000833931	1	VDNKFNKEVPNASDQIFLLPNLNDYQVLAFLHSLRD			11	0.00199948	1	VDNKFNKEVCDAYAQIGNLPNLNVVQKVAFIFSLFD			11	0.00194769	1	VDNKSSKEWLAATIEIGGLPNLNQSQGHAFILSLDD							0.00219208	0.001		0.00266786	0.001		0.001	0.00293446		0.001	0.001
12	0.00119208	1	VDNKFNKEPRAARLEITVLPNLNGIQIRAFISSLAD			12	0.000833931	1	VDNKFNKEVPNASGQIFLLPNLNDYQVLAFLHSLRD			12	0.00199948	1	VDNKFNKEVCDAYAQIGNLPNLNVYQRHAFIFSLFD			12	0.00194769	1	VDNKSSKEWVTATREILRLPNLNGTQRYAFVRSLPD							0.00219208	0.001		0.001	0.00308121		0.00899792	0.0435581		0.001	0.001
13	0.00119208	1	VDNKFNKEPRAARLEITVLPNLNGIQIRAFVFSLYN			13	0.000833931	1	VDNKFNKEVDYAYAQIHCLPNLNHCQVSAFVLSLCN			13	0.00199948	1	VDNKFNKEVCDAYAQIGNLPNLNVYQIVAFISSLDN			13	0.00194769	1	VDNK							0.00219208	0.001		0.001	0.00308121		0.00499896	0.001		0.001	0.001
14	0.00119208	1	VDNKFNKEACDAYAQIGNLPNLNVYQIVAFIRSLDN			14	0.000833931	1	VDNKFNKEVCDAYAQIGNLPNLNRDQKCAFIFSLFD			14	0.00199948	1	VDNKFNKEVCDAYAQIGNLPNLNVYQIVAFIRSLDN			14	0.00194769	1	VDNKL							0.0117287	0.00581951		0.001	0.001		0.00299948	0.001		0.001	0.00638377
15	0.00119208	1	VDNKFNKEGVMQMVKLVVCRT*TSSRKLPSFLAWVT			15	0.000833931	1	VDNKFNKEVFAASGQIGALPNLNAGQGGAFIVSLCD			15	0.00199948	1	VDNKFNKEVCDAYAQIGNLPNLNVYQIVAFIRILDN			15	0.00194769	1	VDNKLSAELKRGPGACLR*QPVQ							0.001	0.0026065		0.001	0.00308121		0.00299948	0.001		0.001	0.001
16	0.00119208	1	VDNKFNKEGNDAFCEISCLPNLNLNQGGAFIFSLDD			16	0.000833931	1	VDNKFNKEQFNAADEIFVLPNLNDDQVLAFINSLRD			16	0.00199948	1	VDNKFNKEVCDAYAQIGNLPNLNVYQIVAFILSLDN			16	0.00194769	1	VDNKFYKEWVNAVAEICSLPNLNVYQGCAFLGSLYD							0.00219208	0.001		0.001	0.001		0.001	0.001		0.001	0.00458918
17	0.00119208	1	VDNKFNKEGNSASDEIGGLPNLNAGQIVAFIRSLDN			17	0.000833931	1	VDNKFNKEWTNAIAQICYLPNLNVYQKPAFVNSLLD			17	0.00199948	1	VDNKFNKEVCDAYAQIGNLPNLNVYQIVAFIRSLDN			17	0.00194769	1	VDNKFYKEWCNAFPEIRNLPNLNGCQGGAFLDSLCD							0.00219208	0.001		0.00266786	0.001		0.001	0.00486892		0.00294768	0.001
18	0.00119208	1	VDNKFNKEGNSASDEIGGLPNLNAFQEFAFIFSLTN			18	0.000833931	1	VDNKFNKEWCNAIAQILSLPNLNGRQMVAFLRSLGN			18	0.00199948	1	VDNKFNKEVCDAYAQIGNLPNLNVYQIVSFIRSLDN			18	0.00194769	1	VDNKFSKEWNTAVTEILNLPNLNPYQLCAFVNSLGD							0.00219208	0.001		0.001	0.001		0.001	0.001		0.001	0.001
19	0.00119208	1	VDNKFNKEGNTAVFEINNLPNLNVYQLSAFLASLAD			19	0.000833931	1	VDNKFNKELHYADHEIISLPNLNEDQELAFVISLNN			19	0.00199948	1	VDNKFNKEVCDSYAQIGNLPNLNVYQIVAFIRSLDN			19	0.00194769	1	VDNKFSKEWNDAALQISLLPNLNVHQGYAFITSLSD							0.001	0.0026065		0.001	0.00308121		0.001	0.00293446		0.001	0.00279459
20	0.00119208	1	VDNKFNKEGNSAACEIYYLPNLNRCQMVAFLFSLCD			20	0.000833931	1	VDNKFNKELHYAVHEIISLPNLNLSQERAFIISLNN			20	0.00199948	1	VDNKFNKEVFDAYAQIGNLPNLNVYQIVAFIRSLDN			20	0.00194769	1	VDNKFSKEWANASAEITFLPNLNEDQQFAFVDSLGN							0.00219208	0.001		0.001	0.001		0.00299948	0.001		0.00294768	0.001
21	0.00119208	1	VDNKFNKEGSSAVSQIGLLPNLNAIQGAAFLSSLCN			21	0.000833931	1	VDNKFNKELHYAVHEIISLPNLNEDQELAFINSLRN			21	0.00199948	1	VDNKFNKEVFYAFDQISILPNLNEAQQSAFICSLVN			21	0.00194769	1	VDNKFSKEWSAATREICGLPNLNQPQGYAFIGSLGD							0.00219208	0.001		0.001	0.001		0.001	0.001		0.001	0.001
22	0.00119208	1	VDNKFNKEGIAAIFQISLLPNLNGCQVCAFVRSLGN			22	0.000833931	1	VDNKFNKELHTAALQIAVLPNLNPSQRHAFVLSLNN			22	0.00199948	1	VDNKFNKEWHNASCQIGFLPNLNLVQGSAFLYSLPN			22	0.00194769	1	VDNKFSKEWFNAACEISALPNLNGDQESAFVGSLSN							0.001	0.0026065		0.001	0.001		0.001	0.001		0.001	0.00279459
23	0.00119208	1	VDNKFNKEGHNAYAQICSLPNLNVGQKCAFISSLDN			23	0.000833931	1	VDNKFNKELCSAADEIFVLPNLNDDQVLAFINSLRD			23	0.00199948	1	VDNKFNKEWATASAQIVVLPNLNLTQGRAFVSSLSN			23	0.00194769	1	VDNKFSKEWFDATCQILSLPNLNVSQRAAFVPSLVN							0.00219208	0.001		0.001	0.001		0.001	0.00293446		0.001	0.00279459
24	0.00119208	1	VDNKFNKEGHNAYAQICSLPNLNVYQIVAFIRSLDN			24	0.000833931	1	VDNKFNKELCSAADEIFVLPNLNDDQVLAFLHSLRD			24	0.00199948	1	VDNKFNKEWVTAFSEIAFLPNLNGRQRGAFVYSLYD			24	0.00194769	1	VDNKFKKEWRNATIEICSLPNLNGPQQHAFVTSLSD							0.001	0.0026065		0.00433572	0.00308121		0.001	0.001		0.001	0.001
25	0.00119208	1	VDNKFNKEGPNAYDEIARLPNLNGSQRCAFVDSLAN			25	0.000833931	1	VDNKFNKELLNAAFEIVSLPNLNLSQERAFIISLNN			25	0.00199948	1	VDNKFNKEWCNAVAQICLLPNLNRYQGGAFVSSLCD			25	0.00194769	1	VDNKFKKKWLTQMPKLFTCRT*TCFRYVPSFAACIM							0.001	0.00581951		0.00433572	0.00516242		0.00299948	0.00680338		0.001	0.001
26	0.00119208	1	VDNKFNKEGPTATYQIHLLPNLNPDQEVAFIVSLGD			26	0.000833931	1	VDNKFNKELFNAAFEIVSLPNLNLSQERAFIISLNN			26	0.00199948	1	VDNKFNKEWFTAFCQINDLPNLNACQRAAFIHSLNN			26	0.00194769	1	VDNKFNKEGNAAVVQIAHLPNLNRAQGRAFIGSLSN							0.001	0.0026065		0.001	0.001		0.001	0.001		0.001	0.001
27	0.00119208	1	VDNKFNKEGDNAASEILDLPNLNQLQGAAFVNSLYD			27	0.000833931	1	VDNKFNKELFNADFEIVSLPNLNLSQERAFIISLNN			27	0.00199948	1	VDNKFNKELVDATIEITDLPNLNDVQVFAFIFSLFD			27	0.00194769	1	VDNKFNKEGNAAAFQIVILPNLNPIQELAFLFSLCD							0.001	0.0026065		0.001	0.00308121		0.00299948	0.001		0.001	0.001
28	0.00119208	1	VDNKFNKEGAAAIGQIGVLPNLNGGQMGAFVRSLSD			28	0.000833931	1	VDNKFNKELFNAALEIVSLPNLNLSQERAFIISLNN			28	0.00199948	1	VDNKFNKELVDATIEIHYLPNLNRDQKCAFIFSLFD			28	0.00194769	1	VDNKFNKEGTSAYTQIFYLPNLNLVQRLAFVSSLGD							0.00338416	0.001		0.001	0.00308121		0.001	0.00680338		0.001	0.001
29	0.00119208	1	VDNKFNKEGADAILQIGNLPNLNVYQIVAFIRSLDN			29	0.000833931	1	VDNKFNKELFNAADEIFVLPNLNDDQVLAFLHSLRD			29	0.00199948	1	VDNKFNKELVDAIHEIHFLPNLNDAQRIAFIFSLFD			29	0.00194769	1	VDNKFNKEGIDATSQITALPNLNACQRRTFLSSLND							0.001	0.0026065		0.001	0.00516242		0.001	0.001		0.001	0.00279459
30	0.00119208	1	VDNKFNKEGAYAVFQIRRLPNLNRFQMSAFVISLFN			30	0.000833931	1	VDNKFNKELFNAAFEIVSLPNLNLSQERAFIISLNN			30	0.00199948	1	VDNKFNKELVDAIFEIFVLPNLNRDQKCAFIFSLFD			30	0.00194769	1	VDNKFNKEGHAATAQIYVLPNLNGYQRLAFIDSLLD							0.00338416	0.001		0.001	0.001		0.001	0.00680338		0.001	0.00279459
31	0.00119208	1	VDNKFNKEGAYAVFQIRRLPNLNVYQIVAFIRSLDN			31	0.000833931	1	VDNKFNKELFNAAFEIVSLPNLNLSQERDFIISLNN			31	0.00199948	1	VDNKFNKELVDAIFEIFVLPNLNDYQRVAFIFSLFD			31	0.00194769	1	VDNKFNKEGRNAFNEINGLPNLNPYQIVAFVGSLIN							0.001	0.0026065		0.001	0.00516242		0.001	0.001		0.001	0.00279459
32	0.00119208	1	VDNKFNKEGVNADTEIRSLPNLNRSQRAAFLRSLGN			32	0.000833931	1	VDNKFNKELFNAAFEIVSLPNLNLSQERAFIIILNN			32	0.00199948	1	VDNKFNKELVDAIFEIFVLPNLNESQVSAFIFSLFD			32	0.00194769	1	VDNKFNKEGRTAFYEIFALPNLNVYQRVAFIPSLYN							0.00219208	0.001		0.001	0.001		0.001	0.00293446		0.001	0.001
33	0.00119208	1	VDNKFNKEGVDASPEIVALPNLNHGQGAAFLGSLID			33	0.000833931	1	VDNKFNKELFNAAFEIVSLPNLNLSQERAFIISLNN			33	0.00199948	1	VDNKFNKELVDAIFEIFVLPNLNESQVSAFVVSLFD			33	0.00194769	1	VDNKFNKEGADAATQITRLPNLNHCQGCAFISSLTD							0.00338416	0.00742601		0.00266786	0.001		0.001	0.001		0.00294768	0.001
34	0.00119208	1	VDNKFNKEGCSAIYEIVGLPNLNHSQEFAFVVSLTD			34	0.000833931	1	VDNKFNKELFNAAFEIVSLPNLNLSQERAFIVSLNN			34	0.00199948	1	VDNKFNKELVDAIFEIFVLPNLNESQIIAFVNSLFD			34	0.00194769	1	VDNKFNKEGGDADFEICSLPNLNVNQIFAFICSLSD							0.001	0.00903252		0.00266786	0.001		0.001	0.001		0.001	0.00279459
35	0.00119208	1	VDNKFNKEGFYAIGQISVLPNLNEYQLVAFVHSLSN			35	0.000833931	1	VDNKFNKELFNAAFEIVSLPNLNLSQERAFLHSLRN			35	0.00199948	1	VDNKFNKEVCDAYAQIGNLPNLNVYQIVAFIRSLDN			35	0.00194769	1	VDNKFNKEGGDASDEIGFLPNLNHFQICAFVFSLVN							0.00219208	0.001		0.00266786	0.001		0.001	0.001		0.00489537	0.00458918
36	0.00119208	1	VDNKFNKEGFNADSEIFLLPNLNLVQRSAFVRSLYD			36	0.000833931	1	VDNKFNKELFNAAFEIVSLPNLNLSQVLAFLHSLSD			36	0.00199948	1	VDNKFNKEGRSASAQIDALPNLNPSQRCAFLPSLFD			36	0.00194769	1	VDNKFNKEGGDAAAQIGALPNLNLDQQDAFVNSLHD							0.001	0.00903252		0.0276858	0.0259745		0.001	0.001		0.001	0.00279459
37	0.00119208	1	VDNKFNKEVTTADREISALPNLKRGPGGCLRLQPA*			37	0.000833931	1	VDNKFNKELFNAAFEIVSLPNLNLSQQRAFIISLNN			37	0.00199948	1	VDNKFNKEGLYAFIQIRYLPNLNEAQRRAFVVSLAN			37	0.00194769	1	VDNKFNKEGVNAIGQICGLPNLNEHQQVAFVPSLVD							0.00338416	0.001		0.001	0.001		0.001	0.001		0.001	0.001
38	0.00119208	1	VDNKFNKEVSYAFREIVILPNLNVIQGAAFIVSLDN			38	0.000833931	1	VDNKFNKELFNAAFEIVSLPNLNLSEERAFIISLNN			38	0.00199948	1	VDNKFNKEGADAILQIGNLPNLNVRQITAFVRSLDD			38	0.00194769	1	VDNKFNKEGVNAACEIFDLPNLNANQLVAFVSSLCN							0.00219208	0.001		0.001	0.001		0.00299948	0.001		0.001	0.001
39	0.00119208	1	VDNKFNKEVIDASCEISYLPNLNEFQGAAFLRSLSD			39	0.000833931	1	VDNKFNKELFNAAFEIVSLPNLNLIQERAFIISLNN			39	0.00199948	1	VDNKFNKEGGYANVQIRFLPNLNVSQVSAFVGSLID			39	0.00194769	1	VDNKFNKEGVDATREINFLPNLNVDQQRAFIGSLDD							0.001	0.0026065		0.00266786	0.001		0.00299948	0.0474271		0.001	0.001
40	0.00119208	1	VDNKFNKEVISATNEIVVLPNLNPPQLGAFVDSLFD			40	0.000833931	1	VDNKFNKELFNAAFEIVSLPNLNDDQVLAFINSLRD			40	0.00199948	1	VDNKFNKEGYDAFDQIIRLPNLNRDQKCAFIFSLFD			40	0.00194769	1	VDNKFNKEGVDAYSEISLLPNLNQVQQCAFVSSLAN							0.00219208	0.001		0.001	0.001		0.001	0.00293446		0.001	0.001
41	0.00119208	1	VDNKFNKEVISATNEIVVLPNLNREQGGAFIVSLWD			41	0.000833931	1	VDNKFNKELFNAAFEIVSLPNLNDDQVLAFLHSLRD			41	0.00199948	1	VDNKFNKEVTYAFLQISTLPNLNGRQLTAFVSSLHN			41	0.00194769	1	VDNKFNKEGVYAVIEICALPNLNDGQEGAFIPSLGD							0.001	0.00421301		0.001	0.001		0.001	0.001		0.00294768	0.001
42	0.00119208	1	VDNKFNKEVISATNEIVVLSNLNPPQGPAFVSSLID			42	0.000833931	1	VDNKFNKELFNAAFEIVSLPNLNDYQVLAFINSLRD			42	0.00199948	1	VDNKFNKEVISATNEIVVLPNLNPPQGPAFVSSLID			42	0.00194769	1	VDNKFNKEGYDADSQIGTLPNLNGNQGYAFVDSLIN							0.00219208	0.0026065		0.001	0.001		0.001	0.00293446		0.00294768	0.00458918
43	0.00119208	1	VDNKFNKEVITAACQIDSLPNLNLSQLRAFVLSLVN			43	0.000833931	1	VDNKFNKELFNAAFEIVSLPNLNDYQVLAFLHSLRN			43	0.00199948	1	VDNKFNKEVLTAAPEIVVLPNLNVDQMCAFLDSLFN			43	0.00194769	1	VDNKFNKEGYYAVAEICSLPNLNAVQGPAFICSLHD							0.00219208	0.001		0.001	0.001		0.001	0.001		0.001	0.001
44	0.00119208	1	VDNKFNKEVIDADYQISFLPNLNRGQLCAFVSSLGN			44	0.000833931	1	VDNKFNKELFNAAFEIVSLPNLNEDQELAFVISLNN			44	0.00199948	1	VDNKFNKE*DFLPAELKRVPARRLHIQPVQ			44	0.00194769	1	VDNKFNKEGSAADYEISGLPNLNRVQLVAFVVSLCN							0.00457624	0.001		0.001	0.00308121		0.001	0.001		0.001	0.001
45	0.00119208	1	VDNKFNKEVIDAFGEICTLPNLNHYQVAAFICSLID			45	0.000833931	1	VDNKFNKELFNAAFEIVSLPNLNGSQRLAFLHSLRD			45	0.00199948	1	VDNKFNKEWNAAAAEILLLPNLNRPQGNAFICSLGD			45	0.00194769	1	VDNKFNKEGSYANREICDLPNLNASQGHAFIASLGD							0.00219208	0.001		0.001	0.001		0.00299948	0.00486892		0.001	0.001
46	0.00119208	1	VDNKFNKEVIDAFFQILRLPNLNVYQIVAFIRSLDN			46	0.000833931	1	VDNKFNKELFNAAFEIVSLPNLTLSQERAFIISLNN			46	0.00199948	1	VDNKFNKEWSYATHQILCLPNLNEAQKPAFIDSLFN			46	0.00194769	1	VDNKFNKEGCDANGQITHLPNLNGCQIRAFLTSLHN							0.00219208	0.001		0.001	0.001		0.001	0.001		0.00294768	0.00458918
47	0.00119208	1	VDNKFNKEVIAAAVEIDSLPNLNVSQVDAFLNSLGN			47	0.000833931	1	VDNKFNKELFNAAFEIVSLPDLNLSQVLAFLHSLRD			47	0.00199948	1	VDNKFNKEWSSASRQILGLPNLNGHQEGAFILSLLN			47	0.00194769	1	VDNKFNKEGCYAISQIDSLPNLNLFQLVAFLFSLRN							0.00338416	0.001		0.001	0.001		0.00699844	0.0106723		0.001	0.001
48	0.00119208	1	VDNKFNKEVIAAYIQIVLLPNLNRCQMVAFLFSLCD			48	0.000833931	1	VDNKFNKELFNAAFEIVSLRN			48	0.00199948	1	VDNKFNKEWIYASIEISNLPNLNDYQRTAFIGSLFN			48	0.00194769	1	VDNKFNKEGCYATDEIVSLPNLNVPQKFAFIVSLDD							0.001	0.00421301		0.00266786	0.001		0.001	0.00293446		0.001	0.001
49	0.00119208	1	VDNKFNKEVHDAVSEIRILPNLNAGQEVAFVHSLPD			49	0.000833931	1	VDNKFNKELFNAAFEIVGLPNLNLSQERAFIISLNN			49	0.00199948	1	VDNKFNKEWAYATSQISLLPNLNGGR*MPSLVACVT			49	0.00194769	1	VDNKFNKEGFDADRQILVLPNLNGVQINAFVHSLRN							0.00219208	0.001		0.001	0.00308121		0.001	0.001		0.001	0.00279459
50	0.00119208	1	VDNKFNKEVRTAVSEIHGLPNLNVFQGNAFVISLRD			50	0.000833931	1	VDNKFNKELFNAAFEIVSLPNLNLSQERAFIISLNN			50	0.00199948	1	VDNKFNKEWGTATSQIYRLPNLNRAQLCAFIRSLHD			50	0.00194769	1	VDNKFNKEVNTAVTEISRLPNLNLTQVSAFVDSLAN							0.001	0.00581951		0.00266786	0.00308121		0.001	0.00293446		0.001	0.00458918
51	0.00119208	1	VDNKFNKEVRDAYAQIGNLPNLNVYQIVAFIRSLDN			51	0.000833931	1	VDNKFNKELFNAAFEICQPAELKPQSGACLHNQPE*			51	0.00199948	1	VDNKFNKEWCAASSEIVCQTRTR*TPSSLA*MT			51	0.00194769	1	VDNKFNKEVNDADFEIPCLPNLNRPQECAFVCSLPD							0.001	0.0026065		0.0260179	0.0238933		0.001	0.001		0.001	0.001
52	0.00119208	1	VDNKFNKEVRTASTEIFVLPNLNDPQLYAFIRSLDN			52	0.000833931	1	VDNKFNKELFNAAFEVVSLPNLNLSQERAFIISLNN			52	0.00199948	1	VDNKFNKELLDAVLQISILPNLNELQRCAFIYSLCN			52	0.00194769	1	VDNKFNKEVTNASFQIGALPNLNGSQESAFINSLYN							0.00219208	0.0026065		0.001	0.001		0.001	0.001		0.00294768	0.001
53	0.00119208	1	VDNKFNKEVRAAYSQIITLPNLNADQLIAFVGSLND			53	0.000833931	1	VDNKFNKELFNAAFGIVSLPNLNLSQERAFIISLNN			53	0.00199948	1	VDNKFNKELGAANIQINILPNLNVYQLDAFVDSLGN			53	0.00194769	1	VDNKFNKEVIYANCQILCRRT*TSSSCTPSYLACTM							0.00219208	0.001		0.00266786	0.001		0.001	0.001		0.00489537	0.00638377
54	0.00119208	1	VDNKFNKEVLNAVCEIIRLPNLNGIQERAFLFSLHN			54	0.000833931	1	VDNKFNKELFNAAFQIVSLPNLNLSQERAFIISLNN			54	0.00199948	1	VDNKFNKELCSASYEIGYLPNLNRDQKCAFIFSLFD			54	0.00194769	1	VDNKFNKEVIYAAAEIAVLPNLNRYQGLAFLCSLCD							0.00219208	0.001		0.00266786	0.00932484		0.001	0.001		0.001	0.001
55	0.00119208	1	VDNKFNKEVLNAYSEIFLLPNLNDAQRIAFIFSLFD			55	0.000833931	1	VDNKFNKELFSAAFEIVSLPNLNLSQERAFIISLNN			55	0.00199948	1	VDNKFTKEGGTANHQIRGLPNLNRAQRYAFLCSLCN			55	0.00194769	1	VDNKFNKEVPNASDQIFLLPNLNDYQVLAFLHSLRD							0.00219208	0.001		0.001	0.001		0.001	0.00293446		0.001	0.001
56	0.00119208	1	VDNKFNKEVDYAVSEIGGLPNLNRGQGRAFIYSLCN			56	0.000833931	1	VDNKFNKVLCSAADEIFVLPNLNDDQVLAFINSLRN			56	0.00199948	1	VDNKFTKEVPDAIREIFILPNLNEGQVVAFVVSLFD			56	0.00194769	1	VDNKFNKEVGNAVVEIYYLPNLNECQLHAFIYSLID							0.001	0.0026065		0.00433572	0.00724363		0.001	0.00486892		0.001	0.001
57	0.00119208	1	VDNKFNKEVDYAVSEIGGLPNLNVHQICAFVRSLDD			57	0.000833931	1	VDNKFNKEGRNADGEITDLPNLNQCQELAFIVSLVN			57	0.00199948	1	VDNKFTKEVPDAIREIFILPNLNEGQVVAFVVSLFD			57	0.00194769	1	VDNKFNKEVGSADCEILNLPNLNRFQLCAFVDSLSN							0.001	0.0026065		0.00266786	0.00516242		0.001	0.001		0.001	0.001
58	0.00119208	1	VDNKFNKEVDSAVFEIHILPNLNDYQRVAFIFSLFD			58	0.000833931	1	VDNKFNKEGDDAIVQISFLPNLNGDQLSAFVISLDN			58	0.00199948	1	VDNKFTKEVPDAIREIFILPNLNEGQVVAFVVSLFD			58	0.00194769	1	VDNKFNKEVVNASHQICGLPNLNAGQVTAFVISLDD							0.00219208	0.001		0.001	0.001		0.001	0.001		0.001	0.001
59	0.00119208	1	VDNKFNKEVANAFHEIVCLPNLNLYQGGAFVNSLFN			59	0.000833931	1	VDNKFNKEGDYAVFQICGLPNLNEGQGAAFIISLNN			59	0.00199948	1	VDNKFTKEVPDAIREIFILPNLNVDQRHAFIFSLFD			59	0.00194769	1	VDNKFNKEVVDASGQIHYLPNLNAFQENAFIGSLVN							0.001	0.0026065		0.001	0.00308121		0.001	0.00873784		0.00294768	0.00279459
60	0.00119208	1	VDNKFNKEVANATVEIRALPNLNVGQRRAFLRSLGD			60	0.000833931	1	VDNKFNKEGDYAVFQICGLPNLNEGQVLAFLHSLRD			60	0.00199948	1	VDNKFTKEVPNASDQIFLLPNLNDDQVLAFINSLRN			60	0.00194769	1	VDNKFNKEVVSADYQIALLPNLNRLQEAAFLDSLLD							0.00338416	0.0026065		0.00266786	0.001		0.001	0.001		0.001	0.001
61	0.00119208	1	VDNKFNKEVGSAFCQICNLPNLNDFQLSAFIRSLGD			61	0.000833931	1	VDNKFNKEGAAAITQINVLPNLNVAQVNAFVGSLRN			61	0.00199948	1	VDNKFTKEVPNASDQIFLLPNLNDYQVLAFLHILRD			61	0.00194769	1	VDNKFNKEVYTAISEIVALPNLNPFQRPAFIGSLGD							0.00338416	0.0026065		0.00266786	0.00516242		0.001	0.001		0.00294768	0.001
62	0.00119208	1	VDNKFNKEVGTAVAEIHFLPNLNQVQRVAFIFSLFD			62	0.000833931	1	VDNKFNKEVCDAYAQIGNLPNLNVYQIVAFIRSLDN			62	0.00199948	1	VDNKFTKEVDSAFIEIRHLPNLNVCQMYAFLFSLDD			62	0.00194769	1	VDNKFNKEVYAADRQICCLPNLNEIQGCAFVGSLSN							0.001	0.0026065		0.00433572	0.001		0.001	0.001		0.001	0.001
63	0.00119208	1	VDNKFNKEVGDAASQITHLPNLNRDQLLAFLFSLGD			63	0.000833931	1	VDNKFNKEWSYATCQILALPNLNAPQESAFICSLSN			63	0.00199948	1	VDNKFTKEVCDAIHEIHFLPNLNDAQRIAFIFSLFD			63	0.00194769	1	VDNKFNKEVCDAIHEIHFLPNLNDAQRIAFIFSLFD							0.00219208	0.001		0.001	0.00308121		0.00299948	0.001		0.00294768	0.001
64	0.00119208	1	VDNKFNKEVGSANHQIAHLPNLNGGQKCAFISSLSN			64	0.000833931	1	VDNKFNKEWLDATFQILILPNLNGLQEFAFLDSLGN			64	0.00199948	1	VDNKFTKEVCYAYCQIDDLPNLNRGQEDAFVRSLPD			64	0.00194769	1	VDNKFNKEVCDAYAQIGNLPNLNVYQIVAFIRSLDD							0.00219208	0.001		0.001	0.00308121		0.001	0.001		0.001	0.00279459
65	0.00119208	1	VDNKFNKEVVTASPQISSLPNLNAFQEFAFIFSLTN			65	0.000833931	1	VDNKFNKEWDDAVDQIVSLPNLNGVQEGAFIVSLDD			65	0.00199948	1	VDNKFTKEWSNASRQICSLPNLNRDQRSAFVFSLPN			65	0.00194769	1	VDNKFNKEVCDAYAQIGNLPNLNVYQIVAFIRSLDN							0.00219208	0.001		0.001	0.00308121		0.001	0.001		0.001	0.00279459
66	0.00119208	1	VDNKFNKEVVDATIEIHYLPNLNRDQKCAFIVSLWD			66	0.000833931	1	VDNKFNKEWGTATSQIYRLPNLNAFQEFAFIFSLTN			66	0.00199948	1	VDNKFTKEWDDASHQISILPNLNPGQQNAFVDSLTN			66	0.00194769	1	VDNKFNKEVCDAYAQICNLPNLNVYQIVAFIRSLDN							0.001	0.0026065		0.001	0.00308121		0.001	0.00293446		0.001	0.001
67	0.00119208	1	VDNKFNKEVVDATIEIHYLPNLNRDQKCAFIRSLDN			67	0.000833931	1	VDNKFNKEWCTAVDEIVRLPNLNEGQETAFIGSLVD			67	0.00199948	1	VDNKFTKEWADAVVQISSLPNLNPAQGGAFVDSLDN			67	0.00194769	1	VDNKFNKEVCNAISEIGILPNLNGFQMGAFIGSLYD							0.00576832	0.00581951		0.001	0.001		0.001	0.001		0.001	0.001
68	0.00119208	1	VDNKFNKEVVDAVTEIGILPNLNDGQGSAFVGSLSN			68	0.000833931	1	VDNKFNKELFNAAFEIVSLPNLNLSQERAFIISLNN			68	0.00199948	1	VDNKFTKEWVSASLEILNLPNLNVTQGYAFVDSLSN			68	0.00194769	1	VDNKFNKEWNNASREIIDLPNLNPGQGCAFIDSLVN							0.001	0.0026065		0.001	0.001		0.001	0.001		0.001	0.001
69	0.00119208	1	VDNKFNKEVVYANVQIFFLPNLNRYQLDAFLRSLAD			69	0.000833931	1	VDNKFTKEVPNASDQIFLLPNLNLSQERAFIISLNN			69	0.00199948	1	VDNKFTKEWSAASCEILGLPNLNQDQQVAFIPSLCN			69	0.00194769	1	VDNKFNKEWNNASFEILTLPNLNDIQGIAFLCSLGD							0.00338416	0.0026065		0.001	0.001		0.00299948	0.0106723		0.001	0.001
70	0.00119208	1	VDNKFNKEVYTATREIAHLPNLNRIQVVRLPRQPA*			70	0.000833931	1	VDNKFTKEVPNASDQIFLLPNLNDDQVLAFINSLRD			70	0.00199948	1	VDNKFTKEWSYASAEILYLPNLNHNQEDAFIFSLSD			70	0.00194769	1	VDNKFNKEWNNATIEILSLPNLNDGQELAFVLSLYD							0.00219208	0.001		0.00266786	0.00308121		0.001	0.001		0.001	0.001
71	0.00119208	1	VDNKFNKEVSNADVQILNLPNLNRNQEDAFIASLVN			71	0.000833931	1	VDNKFTKED			71	0.00199948	1	VDNKFTKEWCSAVFEICRLPNLNLDQGHAFLLSLAD			71	0.00194769	1	VDNKFNKEWNNATDQILDLPNLNLSQLPAFLDSLGD							0.00219208	0.0026065		0.001	0.001		0.001	0.00486892		0.00294768	0.001
72	0.00119208	1	VDNKFNKEVSAAYLEIGNLPNLNVYQIVAFIRSLDN			72	0.000833931	1	VDNKFTKEGNDAADEIFILPNLNDYQVLAFLHSLRD			72	0.00199948	1	VDNKFTKELNSAFTQIIGLPNLNVGQINAFVVSLAN			72	0.00194769	1	VDNKFNKEWNNAIRQICILPNLNRCQRAAFIPSLFN							0.00219208	0.001		0.001	0.001		0.001	0.001		0.001	0.001
73	0.00119208	1	VDNKFNKEVSAAYLEIGRLPNLNGSQKVAFIYSLNN			73	0.000833931	1	VDNKFTKEGPNASDQIFLLPNLNDYQVLAFLHSLRD			73	0.00199948	1	VDNKFTKELAAASARLSVCRT*TASRQSPSYTACTM			73	0.00194769	1	VDNKFNKEWNNAVTQICCLPNLNRAQGHAFLRSLND							0.00219208	0.001		0.001	0.00516242		0.001	0.00293446		0.001	0.001
74	0.00119208	1	VDNKFNKEVSNATVQISSLPNLNAAQGDAFVFSLCN			74	0.000833931	1	VDNKFTKEGDYAVFQICGLPNLNDYQVLAFLHSLRD			74	0.00199948	1	VDNKFTKELYDASSQILGLPNLNRAQQHAFVVSLRN			74	0.00194769	1	VDNKFNKEWNNAVSEILLLPNLNVAQIRAFVPSLSN							0.00219208	0.001		0.001	0.001		0.001	0.001		0.00294768	0.001
75	0.00119208	1	VDNKFNKEVSDAASQITVLPNLNRVQGDAFIASLVN			75	0.000833931	1	VDNKFTKEGDYAVFQICGLPNLNEGQGAAFVGSLHN			75	0.00199948	1	VDNKFTKELFNAAFEIVSLPNLNLSQERAFIISLNN			75	0.00194769	1	VDNKFNKEWNNASAEICNLPNLNQDQEAAFVSSLNN							0.00219208	0.001		0.001	0.00308121		0.001	0.001		0.001	0.001
76	0.00119208	1	VDNKFNKEV*DAYAQIGNLPNLNREQGGAFIVSLWD			76	0.000833931	1	VDNKFTKEVTNASDQIFLLPNLNDYQVLAFLHSLRN			76	0.00199948	1	VDNKFTKEVSDAVVQIHFLPNLNAYQKCAFIFSLLN			76	0.00194769	1	VDNKFNKEWNTAIIQIFYLPNLNERQRPAFITSLDD							0.00338416	0.001		0.001	0.001		0.001	0.001		0.001	0.001
77	0.00119208	1	VDNKFNKEVCHAYAQIGNLPNLNVYQIVAFIRSLDN			77	0.000833931	1	VDNKFTKEVIAAIYEINALPNLNVHQQGAFLGSLFD			77	0.00199948	1	VDNKFTKEVSDAVVQIHFLPNLNAYQKCAFIFSLFD			77	0.00194769	1	VDNKFNKEWNTATVQILALPNLNPHQEHAFLGSLLD							0.00338416	0.001		0.00600359	0.00516242		0.001	0.001		0.001	0.001
78	0.00119208	1	VDNKFNKEVCDAAFEIDALPNLNECQRLAFVYSLCD			78	0.000833931	1	VDNKFTKEVPNAYDQIFLLPNLNDYQVLAFLHSLRD			78	0.00199948	1	VDNKFTKEVPDAIREIFILPNLNEGQVVAFVVSLFD			78	0.00194769	1	VDNKFNKEWNTAITQILRLPNLNLGQGVAFLVSLAD							0.001	0.0026065		0.001	0.00308121		0.00299948	0.001		0.001	0.00279459
79	0.00119208	1	VDNKFNKEVCDTYAQIGNLPNLNLAQQAAFVCSLDD			79	0.000833931	1	VDNKFTKEVPNASDQIFLLPNLNDYQVLAFINSLRN			79	0.00199948	1	VDNKFTKEVESAVFEIHILPNLNDYQRVAFIFSLFD			79	0.00194769	1	VDNKFNKEWNTAISQICALPNLNECQEAAFLDSLVN							0.001	0.0026065		0.001	0.00308121		0.001	0.00293446		0.00294768	0.001
80	0.00119208	1	VDNKFNKEVCDAILQIGNLPNLNVRQITAFVRSLDD			80	0.000833931	1	VDNKFTKEVPNASDQIFLLPNLNDYQVLAFINSLRN			80	0.00199948	1	VDNKFTKEVDSAVCEIHFLPNLNPSQRLAFIFSLFD			80	0.00194769	1	VDNKFNKEWNTAIDEICNLPNLNGCQGGAFIDSLDD							0.00219208	0.001		0.001	0.00724363		0.001	0.001		0.001	0.001
81	0.00119208	1	VDNKFNKEVCDAIHEIHSLPNLNVYQIVAFIRSLDN			81	0.000833931	1	VDNKFTKEVPNASIKFFSCRT*TTIRCLPSYTACVT			81	0.00199948	1	VDNKFTKEVDSAVCEIHFLPNLNRDQKCAFIFSLFD			81	0.00194769	1	VDNKFNKEWNTAISEIISLPNLNGYQEGAFVISLGN							0.001	0.0026065		0.001	0.001		0.001	0.00293446		0.00294768	0.001
82	0.00119208	1	VDNKFNKEVCDAIHEIHFLPNLNDAQRIAFIFSLHN			82	0.000833931	1	VDNKFTKEVPNASEQIFLLPNLNDYQVLAFLHSLRD			82	0.00199948	1	VDNKFTKEVDSAVFEIHFLPNLNVDQRHAFIFSLFD			82	0.00194769	1	VDNKFNKEWNTASIEILSLPNLNRDQESAFIDSLGN							0.001	0.00421301		0.001	0.001		0.001	0.001		0.00294768	0.001
83	0.00119208	1	VDNKFNKEVCDAIHEIHFLPNLNDAQMFAFVDSLRD			83	0.000833931	1	VDNKFTKEVPNASDQNFLLPNLNDYQVLAFLHSLRD			83	0.00199948	1	VDNKFTKEVDSAVFEIHILTNLNDYQRVAFIFSLFD			83	0.00194769	1	VDNKFNKEWNTASLEIISLPNLNVSQEAAFIYSLDN							0.00219208	0.001		0.001	0.001		0.001	0.00293446		0.001	0.001
84	0.00119208	1	VDNKFNKEVCDAIHEIHFLPNLNVYQIVAFIFSLFD			84	0.000833931	1	VDNKFTKEVPNASDQSFLLPNLNDYQVLAFLHSLRD			84	0.00199948	1	VDNKFTKEVDSAVFEIHILPNLNPCQKVAFIFSLFD			84	0.00194769	1	VDNKFNKEWNDATVQICRLPNLNGNQEAAFVPSLAD							0.00457624	0.00742601		0.001	0.001		0.001	0.00680338		0.001	0.001
85	0.00119208	1	VDNKFNKEVCDAIHEIHFLPNLNVYQIVAFIRSLDN			85	0.000833931	1	VDNKFTKEVPNASDQIFLLPNLNDYQVLAFLHSLRD			85	0.00199948	1	VDNKFTKEVDSAVFEIHILPNLNEYQRVAFIFSLFD			85	0.00194769	1	VDNKFNKEWNDATIQILSLPNLNHLQESAFVFSLGD							0.001	0.0026065		0.001	0.001		0.001	0.001		0.00294768	0.001
86	0.00119208	1	VDNKFNKEVCDAIHEIHFLPNLSDAQRIAFIFSLFD			86	0.000833931	1	VDNKFTKEVPNASDQIFLLPNLNDYQVLAFLHSLRD			86	0.00199948	1	VDNKFTKEVDSAVFEIHILPNLNDAQRIAFIFSLFD			86	0.00194769	1	VDNKFNKEWNDAIAQICCLPNLNGNQGLAFISSLTD							0.00457624	0.001		0.001	0.00308121		0.00299948	0.001		0.00294768	0.001
87	0.00119208	1	VDNKFNKEVCDADTEIYPLPNLNPPQGPAFVSSLID			87	0.000833931	1	VDNKFTKEVPNASDQILLLPNLNDYQVLAFLHSLRD			87	0.00199948	1	VDNKFTKEVDSAVFEIHILPNLNDAQRIAFIFSLFD			87	0.00194769	1	VDNKFNKEWNDAISEIASLPNLNGRQGFAFVDSLPN							0.001	0.0026065		0.001	0.001		0.001	0.00486892		0.001	0.001
88	0.00119208	1	VDNKFNKEVCDAVVEIVALPNLNVFQQAAFLNSLAD			88	0.000833931	1	VDNKFTKEVPNASDQISLLPNLNDYQVLAFHTACAM			88	0.00199948	1	VDNKFTKEVDSAVFEIHILPNLNDAQRIAFIFSLFD			88	0.00194769	1	VDNKFNKEWNDAVYQITCLPNLNGNQGGAFVSSLSD							0.00219208	0.001		0.001	0.001		0.001	0.001		0.001	0.00638377
89	0.00119208	1	VDNKFNKEVCDAYAKIGNLPNLNQYQEAAFISSLGD			89	0.000833931	1	VDNKFTKEVPNASDQIFILPNLNDYQVLAFINSLRN			89	0.00199948	1	VDNKFTKEVDSAVFEIHILPNLNDAQRIAFIFSLFD			89	0.00194769	1	VDNKFNKEWNDATYEICSLPNLNDTQEFAFVCSLGN							0.00219208	0.001		0.00433572	0.0134873		0.001	0.001		0.00489537	0.00279459
90	0.00119208	1	VDNKFNKEVCDAYAKIGNLPNLNVYQIVAFIRSPDN			90	0.000833931	1	VDNKFTKEVPNASDQIFPLPNLNDYQVLAFLHSLRD			90	0.00199948	1	VDNKFTKEVDSAVFEIHILPNLNDYQRLAFIFSLFD			90	0.00194769	1	VDNKFNKEWNDAIRQILILPNLNVVQEGAFVCSLSD							0.00219208	0.001		0.00266786	0.001		0.00699844	0.001		0.001	0.001
91	0.00119208	1	VDNKFNKEVCDAYAQNW*SAELKRLSDSRLHSQPGQ			91	0.000833931	1	VDNKFTKEVPNASDQIFPCRT*TTIRCLPSYTACVT			91	0.00199948	1	VDNKFTKEVDSAVFEIHILPNLNDYQRVAFIFSLFD			91	0.00194769	1	VDNKFNKEWNDAASQICYLPNLNGGQECAFVGSLCD							0.00457624	0.001		0.001	0.001		0.001	0.001		0.001	0.001
92	0.00119208	1	VDNKFNKEVCDAYAQISILPNLNAHQVIAFLGSLIN			92	0.000833931	1	VDNKFTKEVPNASDQIFRLPNLNLSQERAFIISLNN			92	0.00199948	1	VDNKFTKEVDSAVFEIHILPNLNDYQRVAFIFSLFD			92	0.00194769	1	VDNKFNKEWNDAVRQICGLPNLNRGQEDAFLYSLCD							0.00219208	0.001		0.001	0.00308121		0.001	0.001		0.001	0.00279459
93	0.00119208	1	VDNKFNKEVCDAYAQISCLPNLNDVQRGAFIASLIN			93	0.000833931	1	VDNKFTKEVPNASDQIFLMPNLNDDQVLAFINSLRN			93	0.00199948	1	VDNKFTKEVDSAVFEIHILPNLNDYQRVAFIFSLFD			93	0.00194769	1	VDNKFNKEWNDAVSEICRLPNLNGYQEVAFVGSLAN							0.00219208	0.001		0.001	0.001		0.001	0.00293446		0.001	0.001
94	0.00119208	1	VDNKFNKEVCDAYAQIAPLPNLNASQRHAFVASLID			94	0.000833931	1	VDNKFTKEVPNASDQIFLMPNLNDYQVLAFINSLRN			94	0.00199948	1	VDNKFTKEVDSAVFEIHILPNLNDYQRVAFVVSLFD			94	0.00194769	1	VDNKFNKEWNDAVAQILDLPNLNGFQEPAFVHSLCN							0.00219208	0.0026065		0.00767145	0.001		0.00299948	0.001		0.001	0.001
95	0.00119208	1	VDNKFNKEVCDAYAQIAYLPNLNQVQMFAFICSLVN			95	0.000833931	1	VDNKFTKEVPNASDQIFLLPNVNDYQVLAFLHSLRD			95	0.00199948	1	VDNKFTKEVDSAVFEIHILPNLNDYQRIAFIFSLFD			95	0.00194769	1	VDNKFNKEWNDAVAQICALPNLNEAQVPAFVSSLVD							0.00219208	0.001		0.00600359	0.00724363		0.001	0.0164757		0.001	0.00279459
96	0.00119208	1	VDNKFNKEVCDAYAQIASLPNLNLCQLPAFLGSLVD			96	0.000833931	1	VDNKFTKEVPNASDQIFLLPNLKLSQERAFIISLNN			96	0.00199948	1	VDNKFTKEVDSAVFEIHILPNLNANQVIAFIFSLFD			96	0.00194769	1	VDNKFNKEWNDAVAQICALPNLNACQEDAFVCSLYN							0.00219208	0.001		0.001	0.001		0.00899792	0.001		0.001	0.001
97	0.00119208	1	VDNKFNKEVCDAYAQIGGLPNLNVYQEDAFIVSLYN			97	0.000833931	1	VDNKFTKEVPNASDQIFLLPNLNHYQVLAFLHSLRD			97	0.00199948	1	VDNKFTKEVDSAVFEIHILPNLNANQVIAFVISLFD			97	0.00194769	1	VDNKFNKEWNDAVSEILGLPNLNRCQGFAFVSSLSD							0.001	0.0026065		0.001	0.001		0.001	0.001		0.001	0.001
98	0.00119208	1	VDNKFNKEVCDAYAQIGGLPNLNDYQRRAFLGSLDD			98	0.000833931	1	VDNKFTKEVPNASDQIFLLPNLNQAQRCAFIASLFN			98	0.00199948	1	VDNKFTKEVDSAVFEIHILPNLNVFQRLAFIFSLFD			98	0.00194769	1	VDNKFNKEWNDASDQILLLPNLNDGQGRAFISSLHN							0.0141129	0.010639		0.001	0.00308121		0.001	0.00486892		0.001	0.001
99	0.00119208	1	VDNKFNKEVCDAYAQIGYLPNLNQDQECAFLGSLVN			99	0.000833931	1	VDNKFTKEVPNASDQIFLLPNLNLSQERASIISLNN			99	0.00199948	1	VDNKFTKEVDSAVFEIHILPNLNVFQRLAFIFSLFD			99	0.00194769	1	VDNKFNKEWNAATAEILSLPNLNVCQGSAFIFSLND							0.00338416	0.001		0.001	0.00308121		0.001	0.001		0.001	0.001
100	0.00119208	1	VDNKFNKEVCDAYAQIGYLPNLNVYQIVAFIRSLDN			100	0.000833931	1	VDNKFTKEVPNASDQIFLLPNLNLSQERAFISA*IM			100	0.00199948	1	VDNKFTKEVDSAVFEIHFLPNLNDYQRVAFIFSLFD			100	0.00194769	1	VDNKFNKEWNAAISQICNLPNLNVHQVGAFVGSLSD							0.00457624	0.0026065		0.001	0.001		0.001	0.001		0.00489537	0.001
101	0.00119208	1	VDNKFNKEVCDAYAQIGNLQNLNVYKIVAFIRSLDN			101	0.000833931	1	VDNKFTKEVPNASDQIFLLPNLNLSQERAFINSLRD			101	0.00199948	1	VDNKFTKEVDSAVFQIHILPNLNDAQRIAFIFSLFD			101	0.00194769	1	VDNKFNKEWNAAVHQICNLPNLNQLQEDAFIYSLCD							0.00219208	0.001		0.00266786	0.00308121		0.001	0.001		0.001	0.001
102	0.00119208	1	VDNKFNKEVCDAYAQIGNLQNLNVYQIVAFIRSLHN			102	0.000833931	1	VDNKFTKEVPNASDQIFLLPNLNDDQVLAFIISLNN			102	0.00199948	1	VDNKFTKEVDSAVFQIHILPNLNDYQRVAFIFSLFD			102	0.00194769	1	VDNKFNKEWNAASREIYRLPNLNVTQEYAFLPSLCN							0.00219208	0.001		0.001	0.001		0.001	0.001		0.00294768	0.00638377
103	0.00119208	1	VDNKFNKEVCDAYAQIGNLQNLNVYQMFAFIRSLDN			103	0.000833931	1	VDNKFTKEVPNASDQIFLLPNLNDDQVLAFLHSLRE			103	0.00199948	1	VDNKFTKEVGAAYYEIGILPNLNPIQRDTFISSLLD			103	0.00194769	1	VDNKFNKEWNYAVNQIIGLPNLNPCQRGAFVCSLDD							0.00338416	0.001		0.00600359	0.00724363		0.144963	0.0880507		0.001	0.001
104	0.00119208	1	VDNKFNKEVCDAYAQIGNLPKLNVYQIVAFIRSLDN			104	0.000833931	1	VDNKFTKEVPNASDQIFLLPNLND*QVLAFLHSLRD			104	0.00199948	1	VDNKFTKEVVDATIEIHYLPNLNDAQRIAFIFSLFD			104	0.00194769	1	VDNKFNKEWNYASRQICNLPNLNGFQVCAFIPSLCD							0.00219208	0.001		0.00266786	0.001		0.001	0.00293446		0.001	0.001
105	0.00119208	1	VDNKFNKEVCDAYAQIGNLPNVNVYQIVAFIRSLDN			105	0.000833931	1	VDNKFTKEVPNASDQIFLLPNLNDYKVLAFLHSLHD			105	0.00199948	1	VDNKFTKEVYSAVFEIHILPNLNDYQRVAFIFSLFD			105	0.00194769	1	VDNKFNKEWNYASIEICRLPNLNVDQVSAFVPSLAD							0.015305	0.0154585		0.00266786	0.001		0.00299948	0.00293446		0.001	0.001
106	0.00119208	1	VDNKFNKEVCDAYAQIGNLPNSNAVQMYAFVCSLND			106	0.000833931	1	VDNKFTKEVPNASDQIFLLPNLNDYQLLAFLHSLRD			106	0.00199948	1	VDNKFTKEVYSAVFEIHILPNLNDYQRVAFIFSLFD			106	0.00194769	1	VDNKFNKEWNYASSQISCLPNLNGTQGNAFVISLVD							0.001	0.0026065		0.001	0.00724363		0.001	0.00293446		0.001	0.001
107	0.00119208	1	VDNKFNKEVCDAYAQIGNLPNLKVYQIVAFIRSLDN			107	0.000833931	1	VDNKFTKEVPNASDQIFLLPNLNDYQLFAFIDSLGD			107	0.00199948	1	VDNKFTKEVCDAIHEIHILPNLNDYQRVAFIFSLFD			107	0.00194769	1	VDNKFNKEWNYASSQISCLPNLNGTQGNAFVISLVN							0.001	0.0026065		0.001	0.001		0.001	0.00293446		0.001	0.001
108	0.00119208	1	VDNKFNKEVCDAYAQIGNLPNLNHNQIGAFIRSLDN			108	0.000833931	1	VDNKFTKEVPNASDQIFLLPNLNDYQERAFIISLRD			108	0.00199948	1	VDNKFTKEVCDAIHEIHFLPNLNANQVIAFVCSLFD			108	0.00194769	1	VDNKFNKEWNYAVYQICHLPNLNQHQESAFVRSLSD							0.00219208	0.001		0.001	0.001		0.001	0.00293446		0.00294768	0.001
109	0.00119208	1	VDNKFNKEVCDAYAQIGNLPNLNHPQRSAFLTSLFD			109	0.000833931	1	VDNKFTKEVPNASDQIFLLPNLNDYQGRAFLCSLVN			109	0.00199948	1	VDNKFTKEWTSAVGEICNLPNLNLHQEIAFIYSLDD			109	0.00194769	1	VDNKFNKEWNYASYEICRLPNLNGCQGVAFVPSLFD							0.00219208	0.001		0.00767145	0.00724363		0.001	0.001		0.001	0.001
110	0.00119208	1	VDNKFNKEVCDAYAQIGNLPNLNHRQRVAFICSLND			110	0.000833931	1	VDNKFTKEVPNASDQIFLLPNLNDYQGAAFVGSLHN			110	0.00199948	1	VDNKFTKEWSYAVLEISRLPNLNRGQQYAFVDSLSD			110	0.00194769	1	VDNKFNKEWNYASNQIAALPNLNVVQEGAFVNSLSD							0.00457624	0.0026065		0.001	0.001		0.00299948	0.001		0.001	0.00279459
111	0.00119208	1	VDNKFNKEVCDAYAQIGNLPNLNHYQKCAFLYSLAN			111	0.000833931	1	VDNKFTKEVPNASDQIFLLPNLNDYQVLSFLHSLRD			111	0.00199948	1	VDNKFTKEWSYAVLEISRLPNLNRGQHYAFVDSLSD			111	0.00194769	1	VDNKFNKEWNYASAQISALPNLNGIQGFAFLSSLSD							0.001	0.0026065		0.001	0.00308121		0.00299948	0.0106723		0.001	0.001
112	0.00119208	1	VDNKFNKEVCDAYAQIGNLPNLNHCQRGAFLCSLRD			112	0.000833931	1	VDNKFTKEVPNASDQIFLLPNLNDYQVLAFIHSLNN			112	0.00199948	1	VDNKFTKEWSYASRQILVLPNLNDLQVNAFVPSLLD			112	0.00194769	1	VDNKFNKEWNYASVEIASLPNLNGLQGSAFVGSLAD							0.001	0.0026065		0.001	0.001		0.001	0.001		0.00294768	0.001
113	0.00119208	1	VDNKFNKEVCDAYAQIGNLPNLNQSQRTAFIFSLYN			113	0.000833931	1	VDNKFTKEVPNASDQIFLLPNLNDYQVLAFIRSLRD			113	0.00199948	1	VDNKFTKEWLTAVYQIIGLPNLNPHQGGAFITSLSD			113	0.00194769	1	VDNKFNKEWNSATCQICSLPNLNEYQGHAFLGSLVD							0.00219208	0.001		0.001	0.001		0.001	0.00293446		0.001	0.00279459
114	0.00119208	1	VDNKFNKEVCDAYAQIGNLPNLNQLLYN			114	0.000833931	1	VDNKFTKEVPNASDQIFLLPNLNDYQVLAFIISLGD			114	0.00199948	1	VDNKFTKEWATATDQICCLPNLNGVQRGAFVASLHD			114	0.00194769	1	VDNKFNKEWNSAISQIGHLPNLNADQEHAFLVSLSN							0.00219208	0.001		0.00266786	0.001		0.001	0.001		0.001	0.00279459
115	0.00119208	1	VDNKFNKEVCDAYAQIGNLPNLNQDQLGAFLVSLPD			115	0.000833931	1	VDNKFTKEVPNASDQIFLLPNLNDYQVLAFHTACVT			115	0.00199948	1	VDNKFTKEWAAAVDQISVLPNLNVVQMDAFVCSLND			115	0.00194769	1	VDNKFNKEWNSAVSEICGLPNLNPNQKRAFVPSLAD							0.00457624	0.00421301		0.001	0.001		0.001	0.001		0.00294768	0.00458918
116	0.00119208	1	VDNKFNKEVCDAYAQIGNLPNLNQAQKTAFINSLCD			116	0.000833931	1	VDNKFTKEVPNASDQIFLLPNLNDYQVLAFPHSLRD			116	0.00199948	1	VDNKFTKEWADAASEIGRLPNLNQGQGGAFISSLSD			116	0.00194769	1	VDNKFNKEWNSAVCEICSLPNLNDFQQSAFIPSLAD							0.00219208	0.001		0.001	0.00308121		0.001	0.00293446		0.001	0.00279459
117	0.00119208	1	VDNKFNKEVCDAYAQIGNLPNLNQVQLSAFLVSLVD			117	0.000833931	1	VDNKFTKEVPNASDQIFLLPNLNDYQVLAFRHSLRD			117	0.00199948	1	VDNKFTKEWGDATNEIIFLPNLNPDQKTAFVGSLGD			117	0.00194769	1	VDNKFNKEWNNAVHQICSLPNLNRPQEVAFIYSLSD							0.479024	0.39138		0.001	0.001		0.00299948	0.001		0.001	0.00279459
118	0.00119208	1	VDNKFNKEVCDAYAQIGNLPNLNQSQLSAFVSSLVD			118	0.000833931	1	VDNKFTKEVPNASDQIFLLPNLNDYQVLAFLHSQRD			118	0.00199948	1	VDNKFTKEWVTAIAEISSLPNLNEAQGGAFVTSLPD			118	0.00194769	1	VDNKFNKEWNNAVGQILALPNLNQGQGVAFLFSLTM							0.00219208	0.001		0.001	0.001		0.001	0.001		0.001	0.00279459
119	0.00119208	1	VDNKFNKEVCDAYAQIGNLPNLNPLQLFAFLDSLGN			119	0.000833931	1	VDNKFTKEVPNASDQIFLLPNLNDYQVLAFLHSLTD			119	0.00199948	1	VDNKFTKEWSYAAGQILDLPNLNLDQESAFVSSLSD			119	0.00194769	1	VDNKFNKEWNNAVGQILALPNLNEGQGGAFVLSLHN							0.00219208	0.001		0.00266786	0.001		0.001	0.001		0.001	0.001
120	0.00119208	1	VDNKFNKEVCDAYAQIGNLPNLNPIQGLAFIYSLID			120	0.000833931	1	VDNKFTKEVPNASDQIFLLPNLNDYQVLAFLHSLPD			120	0.00199948	1	VDNKFTKEWFYAINEICCLPNLNADQLCAFIGSLFD			120	0.00194769	1	VDNKFNKEWNNAIAQICCLPNLNGVQEHAFVASLLD							0.00219208	0.001		0.00600359	0.00516242		0.001	0.001		0.001	0.00279459
121	0.00119208	1	VDNKFNKEVCDAYAQIGNLPNLNPPQGPAFVSSLDN			121	0.000833931	1	VDNKFTKEVPNASDQIFLLPNLNDYQVLAFLHSLRD			121	0.00199948	1	VDNKFTKECCDAACEIACLPNLNDFQLDAFILSLCN			121	0.00194769	1	VDNKFNKEWNNAIAQIFSLPNLNETQETAFVGSLTD							0.164315	0.135946		0.001	0.001		0.001	0.00293446		0.00294768	0.001
122	0.00119208	1	VDNKFNKEVCDAYAQIGNLPNLNPCQKVAFIFSLFD			122	0.000833931	1	VDNKFTKEVPNASDQIFLLPNLNDYQVLAFLHSLRD			122	0.00199948	1	VDNKFTKELPDAIFEIFSLPNLNANQVIAFVCSLFD			122	0.00194769	1	VDNKFNKEWNNAIAQITSLPNLNECQQDAFVGSLGN							0.001	0.00421301		0.10274	0.0967356		0.00299948	0.001		0.00294768	0.00279459
123	0.00119208	1	VDNKFNKEVCDAYAQIGNLPNLNPFQRPAFIDSLID			123	0.000833931	1	VDNKFTKEVPNASDQIFLLPNLNDYQVLAFLHSLRH			123	0.00199948	1	VDNKFTKELYSAVCEIHFLPNLNPSQRLAFIFSLFD			123	0.00194769	1	VDNKFNKEWNNAIVEIVGLPNLNVIQEDAFIYSLRD							0.00338416	0.001		0.001	0.00308121		0.001	0.001		0.001	0.00458918
124	0.00119208	1	VDNKFNKEVCDAYAQIGNLPNLNRHQVGAFVCSLGD			124	0.000833931	1	VDNKFTKEVPNASDQIFLLPNLNDYQVLAFLHSLRV			124	0.00199948	1	VDNKFTKECVPHFMRFTLCRT*TAIRNVPSSLACSM			124	0.00194769	1	VDNKFNKEWNNAVVEILSLPNLNGCQGSAFLGSLRD							0.001	0.0026065		0.00266786	0.00516242		0.00499896	0.001		0.001	0.001
125	0.00119208	1	VDNKFNKEVCDAYAQIGNLPNLNRLQKPAFIPSLAD			125	0.000833931	1	VDNKFTKEVPNASDQIFLLPNLNDYQVLAFLHSLDN			125	0.00199948	1	VDNKFYKEGIDAVCEIRSLPNLNVGQVHAFLYSLVD			125	0.00194769	1	VDNKFNKEWNNAVCEICALPNLNGVQLPAFVRSLYN							0.001	0.0026065		0.00266786	0.001		0.001	0.001		0.001	0.001
126	0.00119208	1	VDNKFNKEVCDAYAQIGNLPNLNRDQRSAFVFSLHD			126	0.000833931	1	VDNKFTKEVPNASDQIFLLPNLNDYQVLAFLHSLGD			126	0.00199948	1	VDNKFYKEGRDAVSQIRVLPNLNRDQKCAFIFSLFD			126	0.00194769	1	VDNKFNKEWNNASDEILRLPNLNGLQQPAFIYSLCD							0.103519	0.0716861		0.00266786	0.00308121		0.001	0.00486892		0.00489537	0.001
127	0.00119208	1	VDNKFNKEVCDAYAQIGNLPNLNREQGGAFVCSLAN			127	0.000833931	1	VDNKFTKEVPNASDQIFLLPNLNDYQVLAFLHSLYN			127	0.00199948	1	VDNKFYKEVNDAIYEIDDLPNLNAAQGLAFVFSLID			127	0.00194769	1	VDNKFNKEWNNASLQIIRLPNLNVFQGHAFIDSLCD							0.00219208	0.0026065		0.00433572	0.00724363		0.001	0.001		0.001	0.001
128	0.00119208	1	VDNKFNKEVCDAYAQIGNLPNLNRGQRAAFICSLAD			128	0.000833931	1	VDNKFTKEVPNASDQIFLLPNLNDYQVLAFLHSLCN			128	0.00199948	1	VDNKFYKEVHSAISQIFCLPNLNGCQVLAFVCSLND			128	0.00194769	1	VDNKFNKEWNTAVREIIRLPNLNVHQEDAFIDSLDN							0.00219208	0.001		0.001	0.00308121		0.001	0.001		0.001	0.001
129	0.00119208	1	VDNKFNKEVCDAYAQIGNLPNLNRGQIPAFIPSLCN			129	0.000833931	1	VDNKFTKEVPNASDQIFLLPNLNDYQVLAFLHSVRD			129	0.00199948	1	VDNKFYKEVGTAVAEIHYLPNLNRDQKCAFIFSLFD			129	0.00194769	1	VDNKFNKEWNTAVSEILNLPNLNPCQEYAFVFSLGN							0.00219208	0.00421301		0.00266786	0.001		0.001	0.001		0.001	0.001
130	0.00119208	1	VDNKFNKEVCDAYAQIGNLPNLNRTQGHAFVGSLTD			130	0.000833931	1	VDNKFTKEVPNASDQIFLLPNLNDYQVLAFLHSCVT			130	0.00199948	1	VDNKFYKEVGTAVAEIHFLPNLNQVQRVAFIFSLFY			130	0.00194769	1	VDNKFNKEWNDATSQIIALPNLNDNQGHAFICSLTD							0.00219208	0.0026065		0.001	0.001		0.001	0.001		0.001	0.00279459
131	0.00119208	1	VDNKFNKEVCDAYAQIGNLPNLNRIQVVRLPRQPA*			131	0.000833931	1	VDNKFTKEVPNASDQIFLLPNLNDYQVLAFLHSLRD			131	0.00199948	1	VDNKFYKEVGTAVAEIHFLPNLNDAQRIAFIFSLFD			131	0.00194769	1	VDNKFNKEWNDAIVQICDLPNLNVSQETAFLGSLDN							0.0319941	0.0218845		0.0176786	0.0259745		0.001	0.001		0.00489537	0.00279459
132	0.00119208	1	VDNKFNKEVCDAYAQIGNLPNLNRDQLLAFVFSLGN			132	0.000833931	1	VDNKFTKEVPNASDQIFLLPNLNDYQVLAFLLSLRD			132	0.00199948	1	VDNKFYKEVGTAVAEIHFLPNLNVDQRHAFIFSLFD			132	0.00194769	1	VDNKFNKEWNDAASQILCLPNLNGYQGYAFVGSLCD							0.00338416	0.001		0.001	0.001		0.001	0.001		0.001	0.00279459
133	0.00119208	1	VDNKFNKEVCDAYAQIGNLPNLNRAQLCAFIRSLHD			133	0.000833931	1	VDNKFTKEVPNASDQIFLLPNLNDYQVLAFLDSLLN			133	0.00199948	1	VDNKFYKEVVDATIEIHYLPNLNDAQRIAFIFSLFD			133	0.00194769	1	VDNKFNKEWNDAAVQIASLPNLNLCQKECLPWQPG*							0.001	0.0026065		0.00433572	0.00308121		0.001	0.00293446		0.001	0.001
134	0.00119208	1	VDNKFNKEVCDAYAQIGNLPNLNRVQQAAFLDSLYD			134	0.000833931	1	VDNKFTKEVPNASDQIFLLPNLNDYQVLAFVSSLTN			134	0.00199948	1	VDNKFYKEVCDAIHEIHYLPNLNRDQKCAFIFSLFD			134	0.00194769	1	VDNKFNKEWNDAVCEICRLPNLNVLQESAFIASLPN							0.001	0.00581951		0.001	0.001		0.0109974	0.051296		0.001	0.001
135	0.00119208	1	VDNKFNKEVCDAYAQIGNLPNLNRFQLVAFLDSLAN			135	0.000833931	1	VDNKFTKEVPNASDQIFLLPNLNDYQVLAFVFSLYN			135	0.00199948	1	VDNKFYKEVCDAIHEIHFLPNLNDAQRIAFIFSLFD			135	0.00194769	1	VDNKFNKEWNDASRQISILPNLNAYQGSAFLTSLIN							0.00219208	0.001		0.00266786	0.001		0.001	0.001		0.001	0.001
136	0.00119208	1	VDNKFNKEVCDAYAQIGNLPNLNRFQRDAFIRSLGD			136	0.000833931	1	VDNKFTKEVPNASDQIFLLPNLNDYQVLAFLHSLRD			136	0.00199948	1	VDNKFYKEWTYAFPQILRLPNLNEYQGSAFVNSLRN			136	0.00194769	1	VDNKFNKEWNDAFSQICALPNLNVLQRSAFLGSLGD							0.00219208	0.001		0.00266786	0.00308121		0.001	0.001		0.00294768	0.001
137	0.00119208	1	VDNKFNKEVCDAYAQIGNLPNLNLNQGGAFIFSLDD			137	0.000833931	1	VDNKFTKEVPNASDQIFLLPNLNDYQVLVFLHSLRD			137	0.00199948	1	VDNKFYKEWSAATYEICVLPNLNGVQESAFVVSLVD			137	0.00194769	1	VDNKFNKEWNDATVQILCLPNLNRSQGRAFIDSLND							0.00219208	0.001		0.001	0.001		0.001	0.001		0.00489537	0.001
138	0.00119208	1	VDNKFNKEVCDAYAQIGNLPNLNLSQRIAFVQPER			138	0.000833931	1	VDNKFTKEVPNASDQIFLLPNLNDYQVFAFLHSLRD			138	0.00199948	1	VDNKFYKEWISAADEIARLPNLNVVQMPAFVSSLSD			138	0.00194769	1	VDNKFNKEWNDAIFEILGLPNLNGPQQFAFISSLPN							0.001	0.0026065		0.001	0.001		0.0409896	0.184774		0.001	0.001
139	0.00119208	1	VDNKFNKEVCDAYAQIGNLPNLNLLQGFAFIGSLFD			139	0.000833931	1	VDNKFTKEVPNASDQIFLLPNLNDSQVLAFLHSLRD			139	0.00199948	1	VDNKFYKEWITAAGQICTLPNLNESQEDAFVASLTN			139	0.00194769	1	VDNKFNKEWNDAVRQICTLPNLNLNQGGAFICSLGN							0.00219208	0.001		0.00266786	0.001		0.001	0.001		0.00294768	0.001
140	0.00119208	1	VDNKFNKEVCDAYAQIGNLPNLNLAQQAAFVCSLDD			140	0.000833931	1	VDNKFTKEVPNASDQIFLLPNLNEPQLSAFLASLGN			140	0.00199948	1	VDNKFYKEWIDASDQISNLPNLNGGQGSAFLRSLCD			140	0.00194769	1	VDNKFNKEWNDASVRISALPNLNLCQQPAFLFSLHD							0.001	0.0026065		0.001	0.00308121		0.001	0.001		0.001	0.001
141	0.00119208	1	VDNKFNKEVCDAYAQIGNLPNLNLGQVHAFLVSLRN			141	0.000833931	1	VDNKFTKEVPNASDQIFLLPNLNEVQERAFLHSLRD			141	0.00199948	1	VDNKFYKEWISAATQICSLPNLNLSQGDAFVDSLGN			141	0.00194769	1	VDNKFNKEWNAATVEIARLPNLNALQQRAFIGSLDN							0.001	0.0026065		0.446319	0.970843		0.001	0.001		0.001	0.001
142	0.00119208	1	VDNKFNKEVCDAYAQIGNLPNLNLVQGLAFIASLYN			142	0.000833931	1	VDNKFTKEVPNASDQIFLLPNLNDYQVLAFLHSLRD			142	0.00199948	1	VDNKFYKEWRAAANEIVTLPNLNVCQQSAFVYSLGD			142	0.00194769	1	VDNKFNKEWNAAISQILLLPNLNANQGPAFVSSLRD							0.00219208	0.0026065		0.001	0.001		0.001	0.00293446		0.001	0.001
143	0.00119208	1	VDNKFNKEVCDAYAQIGNLPNLNLYQIVAFIRSLDN			143	0.000833931	1	VDNKFTKEVPNASDQIFLLPNLNAGQIYAFLDSLSN			143	0.00199948	1	VDNKFYKEWRAASDEIILLPNLNRCQEDAFLSSLTN			143	0.00194769	1	VDNKFNKEWNAAILEISALPNLNLDQGGAFLGSLDN							0.001	0.0026065		0.001	0.001		0.001	0.001		0.001	0.00279459
144	0.00119208	1	VDNKFNKEVCDAYAQIGNLPNLNLTQEDAFLGSLHN			144	0.000833931	1	VDNKFTKEVPNASDQIFLLPNLNAVQRVAFIFSLGD			144	0.00199948	1	VDNKFYKEWLNASSQITALPNLNEYQRRAFVRSLCD			144	0.00194769	1	VDNKFNKEWNAAIGEIVNLPNLNRFQEYAFVRSLSN							0.001	0.00421301		0.00600359	0.011406		0.00299948	0.001		0.001	0.00458918
145	0.00119208	1	VDNKFNKEVCDAYAQIGNLPNLNLIQRPAFILSLGD			145	0.000833931	1	VDNKFTKEVPNASDQIFLLPNLNGGQRDAFVISLNN			145	0.00199948	1	VDNKFYKEWLAAVDQIAGLPNLNGVQVSAFVNSLDD			145	0.00194769	1	VDNKFNKEWNAAAAEIIALPNLNVDQGPAFVVSLVN							0.00219208	0.001		0.001	0.00308121		0.001	0.001		0.001	0.001
146	0.00119208	1	VDNKFNKEVCDAYAQIGNLPNLNLDQRGAFIDSLDD			146	0.000833931	1	VDNKFTKEVPNASDQIFLLPNLNVYQVLAFLHSLRD			146	0.00199948	1	VDNKFYKEWAAATDQISLLPNLNVCQRCAFVDSLGD			146	0.00194769	1	VDNKFNKEWNAAAYEITLLPNLNDLQRNAFIPSLDD							0.00219208	0.00421301		0.001	0.001		0.001	0.001		0.001	0.001
147	0.00119208	1	VDNKFNKEVCDAYAQIGNLPNLNLDQVRAFVCSLID			147	0.000833931	1	VDNKFTKEVPNASDQIFLLPNLNVSQIRAFVRSLCN			147	0.00199948	1	VDNKFYKEWADAACQILNLPNLNLCQRPAFVTSLCD			147	0.00194769	1	VDNKFNKEWNAAAYQIILM							0.00219208	0.001		0.001	0.001		0.001	0.001		0.001	0.001
148	0.00119208	1	VDNKFNKEVCDAYAQIGNLPNLNLDQRSTFIGSLYN			148	0.000833931	1	VDNKFTKEVPNASDQIFLLPNLNVTQVYAFLTSLRN			148	0.00199948	1	VDNKFYKEWGYAAAQIGSLPNLNLSQGNAFVSSLPN			148	0.00194769	1	VDNKFNKEWNAAVLEILGLPNLNRGQGGAFVYSLGD							0.00338416	0.001		0.001	0.00308121		0.001	0.001		0.001	0.00458918
149	0.00119208	1	VDNKFNKEVCDAYAQIGNLPNLNLCQRNAFIVSLAN			149	0.000833931	1	VDNKFTKEVPNASDQIFLLPNLNVDQKLAFLSSLHD			149	0.00199948	1	VDNKFYKEWVTASLEIAGLPNLNHNQEDAFIFSLSD			149	0.00194769	1	VDNKFNKEWNAASREIVALPNLNAVQRDAFVNSLCD							0.001	0.00421301		0.00266786	0.001		0.001	0.001		0.001	0.001
150	0.00119208	1	VDNKFNKEVCDAYAQIGNLPNLNDTQVSAFLFSLGN			150	0.000833931	1	VDNKFTKEVPNASDQIFLLPNLNVAQVNAFVGSLRN			150	0.00199948	1	VDNKFYKEWVYAAGQICALPNLNQNQERAFIGSLVD			150	0.00194769	1	VDNKFNKEWNAASCEILNLPNLNACQRFAFVDSLID							0.00219208	0.001		0.001	0.00308121		0.001	0.001		0.001	0.001
151	0.00119208	1	VDNKFNKEVCDAYAQIGNLPNLNDAQRIAFIFSLRD			151	0.000833931	1	VDNKFTKEVPNASDQIFLLPNLNDYQVLAFLHSLRD			151	0.00199948	1	VDNKFYKEWVAASGEICALPNLNLYQVDAFVHSLID			151	0.00194769	1	VDNKFNKEWNAAADQISHLPNLNHRQKFAFIGSLVN							0.0474911	0.00903252		0.0326894	0.0238933		0.001	0.001		0.00294768	0.001
152	0.00119208	1	VDNKFNKEVCDAYAQIGNLPNLNDAQRIAFMFSLFD			152	0.000833931	1	VDNKFTKEVPNASDQIFLLPILNDYQVLAFLHSLRD			152	0.00199948	1	VDNKFYKEWYDAVAQICGLPNLNQSQEGAFVYSLGN			152	0.00194769	1	VDNKFNKEWNAAANEISRLPNLNDYQGSAFVISLRN							0.00219208	0.001		0.001	0.00308121		0.001	0.001		0.00294768	0.001
153	0.00119208	1	VDNKFNKEVCDAYAQIGNLPNLNDAQRIAFIRSLDN			153	0.000833931	1	VDNKFTKEVPNASDQIFLLPDLNDYQVLAFLHSLRD			153	0.00199948	1	VDNKFYKEWYNAYSQIRFLPNLNPCQGFAFVCSLRD			153	0.00194769	1	VDNKFNKEWNAAAAQIYRLPNLNQGQECAFIASLSD							0.00338416	0.001		0.001	0.001		0.001	0.001		0.001	0.00279459
154	0.00119208	1	VDNKFNKEVCDAYAQIGNLPNLNDAQIVAFIRSLDN			154	0.000833931	1	VDNKFTKEVPNASDQIFLLSNLNDYQVLAFLHSLRD			154	0.00199948	1	VDNKFYKEWYAATSEICNLPNLNGAQGYAFVASLTD			154	0.00194769	1	VDNKFNKEWNAAVHEIVNLPNLNGGQRDAFVGSLGN							0.00338416	0.001		0.00266786	0.001		0.001	0.001		0.001	0.00279459
155	0.00119208	1	VDNKFNKEVCDAYAQIGNLPNLNDVQGGAFVGSLVD			155	0.000833931	1	VDNKFTKEVPNASDQIFLLPNLNDYQVLAFLHSLRD			155	0.00199948	1	VDNKFYKEWYSAVCEIFPLPNLNAVQGRAFLGSLND			155	0.00194769	1	VDNKFNKEWNAAVDEITNLPNLNAVQEDAFVSSLGN							0.00219208	0.00421301		0.001	0.001		0.001	0.00486892		0.001	0.001
156	0.00119208	1	VDNKFNKEVCDAYAQIGNLPNLNDYQRDAFLPSLSD			156	0.000833931	1	VDNKFTKEVPNASDQIFFLPNLNDYQVLAFINSLRD			156	0.00199948	1	VDNKFYKEWSAATNEIVVLPNLNQVQEDAFLGSLCN			156	0.00194769	1	VDNKFNKEWNAAVCQIINLPNLNPVQGSAFVDSLSN							0.001	0.0026065		0.001	0.001		0.001	0.001		0.001	0.001
157	0.00119208	1	VDNKFNKEVCDAYAQIGNLPNLNDYQIVAFIRSLDN			157	0.000833931	1	VDNKFTKEVPNASDQIFFLPNLNDYQVLAFLHSLRD			157	0.00199948	1	VDNKFYKEWCNAAIQIIRLPNLNGFQGGAFVDSLGN			157	0.00194769	1	VDNKFNKEWNAAVCQICNLPNLNASQGSASVFSLVD							0.00219208	0.001		0.001	0.001		0.00699844	0.001		0.001	0.00279459
158	0.00119208	1	VDNKFNKEVCDAYAQIGNLPNLNDYQVLAFLHSLRD			158	0.000833931	1	VDNKFTKEVPNASDQFFLLPNLNDYQVLAFLHSLRD			158	0.00199948	1	VDNKFYKEWCAASSEIVCQTRTR*TPSSLALMT			158	0.00194769	1	VDNKFNKEWNYAVCEILTLPNLNVNQESAFVCSLHN							0.00219208	0.001		0.001	0.00308121		0.00299948	0.0145412		0.001	0.00279459
159	0.00119208	1	VDNKFNKEVCDAYAQIGNLPNLNENQEFAFINSLHN			159	0.000833931	1	VDNKFTKEVPNASDHIFLLPNLNDYQVLAFLHSLRD			159	0.00199948	1	VDNKFYKEWCYATLEISRLPNLKRLSERCLPMQPA*			159	0.00194769	1	VDNKFNKEWNYAVLQICSLPNLNGGQGDAFVCSLSD							0.00219208	0.001		0.001	0.001		0.001	0.001		0.001	0.001
160	0.00119208	1	VDNKFNKEVCDAYAQIGNLPNLNESQVSAFVVSLFD			160	0.000833931	1	VDNKFTKEVPNASDQIFLLPNLNDYQVLAFLHSLRD			160	0.00199948	1	VDNKFYKEWFDASREICGLPNLNPAQGGAFICSLPD			160	0.00194769	1	VDNKFNKEWNYAVCQICSLPNLNVAQENAFVDSLGN							0.00219208	0.001		0.001	0.001		0.00299948	0.001		0.001	0.001
161	0.00119208	1	VDNKFNKEVCDAYAQIGNLPNLNESQVVAFVVSLFD			161	0.000833931	1	VDNKFTKEVPNASDLIFLLPNLNDYQVLAFLHSLRD			161	0.00199948	1	VDNKFYKEWFSATGQILHLPNLNPVQGNAFVRSLGD			161	0.00194769	1	VDNKFNKEWNYASIQISSLPNLNGSQGPAFLHSLAD							0.001	0.0026065		0.001	0.001		0.001	0.00293446		0.00294768	0.001
162	0.00119208	1	VDNKFNKEVCDAYAQIGNLPNLNEPQGNAFLLSLAN			162	0.000833931	1	VDNKFTKEVPNASDEIFLLPNLNDYQVLAFLHSLRD			162	0.00199948	1	VDNKFYKELSDAVYEIFSLPNLNEVQGCAFVVSLFD			162	0.00194769	1	VDNKFNKEWNYATNQIIRLPNLNGCQGTAFIGSLYD							0.001	0.0026065		0.001	0.00308121		0.001	0.001		0.00294768	0.001
163	0.00119208	1	VDNKFNKEVCDAYAQIGNLPNLNEPQVCAFVVSLCD			163	0.000833931	1	VDNKFTKEVPNASD*IFLLPNLNEDQELAFVISLNN			163	0.00199948	1	VDNKFYKELDSAIREIVPLPNLNVHQVCAFVHSLAD			163	0.00194769	1	VDNKFNKEWNYATCQILSLPNLNASQEGAFLCSLGN							0.001	0.0026065		0.00767145	0.00516242		0.001	0.001		0.00489537	0.001
164	0.00119208	1	VDNKFNKEVCDAYAQIGNLPNLNEPQMTAFVHSLSD			164	0.000833931	1	VDNKFTKEVPNAFDQIFLLPNLNDYQVLAFLHSLRD			164	0.00199948	1	VDNKFYKELAYAIHEIHFLPNLNDAQRIAFIFSLFD			164	0.00194769	1	VDNKFNKEWNYAIDQITSLPNLNEYQEY							0.0212654	0.0315236		0.00266786	0.00308121		0.001	0.001		0.001	0.001
165	0.00119208	1	VDNKFNKEVCDAYAQIGNLPNLNEGQRVAFVSSLSG			165	0.000833931	1	VDNKFTKEVPNVSDQIFLLPNLNLSQERAFIISLNN			165	0.00199948	1	VDNKFYKELAYAIHEIFCLPNLNDAQRIAFIFSLFD			165	0.00194769	1	VDNKFNKEWNYAADQICLLPNLNPYQEVAFIDSLVD							0.00457624	0.00421301		0.00266786	0.00308121		0.00299948	0.001		0.001	0.001
166	0.00119208	1	VDNKFNKEVCDAYAQIGNLPNLNEYQRGAFIISLYD			166	0.000833931	1	VDNKFTKEVPNASDQIFLLPNLNDYQVLAFLHSLRD			166	0.00199948	1	VDNKFYKELAYAIHEIFCLPNLNEPQVCAFIFSLFD			166	0.00194769	1	VDNKFNKEWNYAVPEIVNLPNLNADQGFAFVDSLAD							0.00219208	0.001		0.001	0.00308121		0.001	0.00293446		0.00489537	0.001
167	0.00119208	1	VDNKFNKEVCDAYAQIGNLPNLNESQIIAFVNSLFD			167	0.000833931	1	VDNKFTKEVPSASDQIFLLPNLNDYQVLAFLHSLRD			167	0.00199948	1	VDNKFYKELAYAIHEIFCLPNLNEPQVCAFIFSLFD			167	0.00194769	1	VDNKFNKEWNYAVSQILYLPNLNGCQGCAFVDSLYD							0.00219208	0.001		0.00266786	0.00308121		0.001	0.001		0.001	0.001
168	0.00119208	1	VDNKFNKEVCDAYAQIGNLPNLNECQQVAFVPSLID			168	0.000833931	1	VDNKFTKEVPYASDQIFLLPNLNDYQVLAFLHSLRD			168	0.00199948	1	VDNKFYKELAYAIHEIFCLPNLNEPQVCAFVVSLFD			168	0.00194769	1	VDNKFNKEWNYAVREIVNLPNLNRTQEGAFVASLVN							0.00219208	0.001		0.001	0.00516242		0.001	0.001		0.001	0.001
169	0.00119208	1	VDNKFNKEVCDAYAQIGNLPNLNEFQKAAFVGSLGN			169	0.000833931	1	VDNKFTKEVANASDQIFLLPNLNDYQVLAFLHSLRD			169	0.00199948	1	VDNKFYKELAYAIHEIFCLPNLNEPQVCAFVVSLFD			169	0.00194769	1	VDNKFNKEWNYASIEILSLPNLNRPQVGAFLVSLPD							0.001	0.00421301		0.00266786	0.001		0.001	0.001		0.001	0.001
170	0.00119208	1	VDNKFNKEVCDAYAQIGNLPNLNEFQVGAFVGSLDD			170	0.000833931	1	VDNKFTKEVGNAFCQISRLPNLNGAQGRAFVRSLCN			170	0.00199948	1	VDNKFYKELAYAIHEIFCLPNLNEPQVCAFVSSLFD			170	0.00194769	1	VDNKFNKEWNSATTEILGLPNLNEGQLVAFIPSLGN							0.0176891	0.00903252		0.00433572	0.00516242		0.001	0.00293446		0.001	0.001
171	0.00119208	1	VDNKFNKEVCDAYAQIGNLPNLNEFQVGAFVVSLCD			171	0.000833931	1	VDNKFTKEVFNAAFEIVSLPNLNDYQVLAFLHSLRD			171	0.00199948	1	VDNKFYKELAYAIHEIFCLPNLNEPQLCAFVVSLCD			171	0.00194769	1	VDNKFNKEWNSAIAEILALPNLNEIQEAAFIGSLTD							0.00338416	0.001		0.00600359	0.0155685		0.001	0.001		0.001	0.001
172	0.00119208	1	VDNKFNKEVCDAYAQIGNLPNLNEFQEAAFVTSLPN			172	0.000833931	1	VDNKFTKEVPNSSDQIFLLPNLNDYQVLAFLHSLRD			172	0.00199948	1	VDNKFYKELAYAIYEIFCLPNLNEPQVCAFVVSLCD			172	0.00194769	1	VDNKFNKEWNSAAAQIACLPNLNVYQEVAFVSSLSN							0.00219208	0.00742601		0.0193465	0.0301369		0.001	0.00293446		0.001	0.001
173	0.00119208	1	VDNKFNKEVCDAYAQIGNLPNLNEFQGAAFLRSLSD			173	0.000833931	1	VDNKFTKEWHAASVEIAFLPNLNGGQMAAFVDSLGN			173	0.00199948	1	VDNKFYKELADAVSEICFLPNLNAFQVFAFLNSLYD			173	0.00194769	1	VDNKFNKEWNSAVIEICRLPNLNGYQEGAFISSLGN							0.00219208	0.0026065		0.00266786	0.001		0.00299948	0.001		0.00294768	0.001
174	0.00119208	1	VDNKFNKEVCDAYAQIGNLPNLNATQRAAFLASLDN			174	0.000833931	1	VDNKFTKEWHSAVAEILTLPNLNGGQGYAFVASLHD			174	0.00199948	1	VDNKFYKELGDAIYEIFVLPNLNAVQVNAFVLSLFD			174	0.00194769	1	VDNKFNKEWNSAVGEISRLPNLNAPQEVAFVNSLYD							0.00219208	0.001		0.001	0.001		0.001	0.00293446		0.001	0.00279459
175	0.00119208	1	VDNKFNKEVCDAYAQIGNLPNLNASQRFAFIISLGD			175	0.000833931	1	VDNKFTKEWDYAAFQICGLPNLNVRQGLAFVPSLDD			175	0.00199948	1	VDNKFYKELVSAYSQIIYLPNLNLRQMAAFVTSLVN			175	0.00194769	1	VDNKFNKEWTNAIAQILCLPNLNEFQEDAFVGSLSD							0.00219208	0.001		0.0110072	0.0218121		0.001	0.00293446		0.001	0.001
176	0.00119208	1	VDNKFNKEVCDAYAQIGNLPNLNASQRGAFVGSLSD			176	0.000833931	1	VDNKFTKEWADATGEICRLPNLNVSQGCAFLSSLDD			176	0.00199948	1	VDNKFYKELYTAIYEILVLPNLNESQIIAFVNSLFD			176	0.00194769	1	VDNKFNKEWTNAVSQILCLPNLNAGQEDAFVRSLHN							0.00219208	0.001		0.001	0.001		0.001	0.001		0.001	0.00279459
177	0.00119208	1	VDNKFNKEVCDAYAQIGNLPNLNAYQECAFIASLVD			177	0.000833931	1	VDNKFTKEWADASIQITDLPNLNGGQGIAFVSSLVD			177	0.00199948	1	VDNKFYKELYTAIYEIFVLPNLNDAQRIAFIFSLFD			177	0.00194769	1	VDNKFNKEWTNAIRQICALPNLNPPQRDAFVCSLCD							0.00219208	0.00421301		0.001	0.001		0.00299948	0.001		0.001	0.001
178	0.00119208	1	VDNKFNKEVCDAYAQIGNLPNLNACQVTAFISSLDN			178	0.000833931	1	VDNKFTKEWADASIQILDLPNLNEVQGVAFVDSLVD			178	0.00199948	1	VDNKFYKELYTAIYEIFVLPNLNENQIVAFIISLFD			178	0.00194769	1	VDNKFNKEWTNAIRQICALPNLNDCQQNAFISSLDD							0.00219208	0.001		0.001	0.001		0.001	0.001		0.001	0.00279459
179	0.00119208	1	VDNKFNKEVCDAYAQIGNLPNLNANQVIAFVCSLFD			179	0.000833931	1	VDNKFTKEWFYATCQIISLPNLNEFQKNAFLFSLYD			179	0.00199948	1	VDNKFYKELYTAIYEIFVLPNLNESQRLAFIFSLFD			179	0.00194769	1	VDNKFNKEWTNAIAQICYLPNLNRCQVYAFLPSLLD							0.00219208	0.0026065		0.001	0.001		0.001	0.001		0.001	0.001
180	0.00119208	1	VDNKFNKEVCDAYAQIGNLPNLNASQEAAFVGSLSD			180	0.000833931	1	VDNKFTKELNDAAYQIATLPNLNEVQERAFVNSLFD			180	0.00199948	1	VDNKFYKELYTAIYEIFVLPNLNESQIIAFIFSLFD			180	0.00194769	1	VDNKFNKEWTTAAYQICNLPNLNGTRRLPSQIACSM							0.00338416	0.001		0.001	0.001		0.001	0.001		0.001	0.001
181	0.00119208	1	VDNKFNKEVCDAYAQIGNLPNLNASQEAAFVGSLIN			181	0.000833931	1	VDNKFTKELPNASDQIFLLPNLNDDQVLAFINSLRN			181	0.00199948	1	VDNKFYKELYTAIYEIFVLPNLNESQIIAFVNSLFD			181	0.00194769	1	VDNKFNKEWTTAVTEILHLPNLNPTQGSAFVASLRD							0.001	0.0026065		0.001	0.001		0.001	0.0106723		0.001	0.001
182	0.00119208	1	VDNKFNKEVCDAYAQIGNLPNLNARQKPAFLVSLRD			182	0.000833931	1	VDNKFTKELCSAADEIFVLPNLNLSQERAFIISLNN			182	0.00199948	1	VDNKFYKELYTAIYEIFVLPNLNESQIIAFVNSLFD			182	0.00194769	1	VDNKFNKEWTDATSQICHLPNLNGGQGCAFIHSLFD							0.00219208	0.001		0.00767145	0.00724363		0.001	0.001		0.001	0.001
183	0.00119208	1	VDNKFNKEVCDAYAQIGNLPNLNALQGAAFVSSLLN			183	0.000833931	1	VDNKFTKELCSAADEIFVLPNLNDDQVLAFIISLNN			183	0.00199948	1	VDNKFYKELCDAIVEIHFLPNLNVDQRHAFIFSLFD			183	0.00194769	1	VDNKFNKEWTDAVTEIINLPNLNLGQGAAFIVSLTN							0.0105366	0.0154585		0.00767145	0.00516242		0.00499896	0.00293446		0.001	0.001
184	0.00119208	1	VDNKFNKEVCDAYAQIGNLPNLNADQVAAFINSLHD			184	0.000833931	1	VDNKFTKELCSAADEIFVLPNLNDDQVLAFINSLRD			184	0.00199948	1	VDNKFYKEGNNATIEIVDLPNLNEGQERAFIGSLFD			184	0.00194769	1	VDNKFNKEWTAASVEILNLPNLNGGQGVAFVGSLAD							0.00219208	0.001		0.0310215	0.0426242		0.00699844	0.0338858		0.00294768	0.001
185	0.00119208	1	VDNKFNKEVCDAYAQIGNLPNLNASQEIAFVVSLYN			185	0.000833931	1	VDNKFTKELCSAADEIFVLPNLNDDQVLAFLHSLRD			185	0.00199948	1	VDNKFYKEGGDAYCQILALPNLNVCQESAFVGSLSD			185	0.00194769	1	VDNKFNKEWTAATVQILGLPNLNDRQRVAFVSSLGD							0.0200733	0.017065		0.001	0.00308121		0.001	0.001		0.001	0.001
186	0.00119208	1	VDNKFNKEVCDAYAQIGNLPNLNACQLGAFLSSLSN			186	0.000833931	1	VDNKFTKELCSAADEIFVLPNLNDDQVLAFLHSLRD			186	0.00199948	1	VDNKFYKEGVNAFAQICILPNLNAHQEIAFLDSLCD			186	0.00194769	1	VDNKFNKEWTAAAHEICHLPNLNQGQGRAFLDSLND							0.00338416	0.0026065		0.001	0.00308121		0.001	0.001		0.001	0.00279459
187	0.00119208	1	VDNKFNKEVCDAYAQIGNLPNLNACQVDAFIGSLRD			187	0.000833931	1	VDNKFTKELFNAAFEIVRLPNLNLSQERAFIISLNN			187	0.00199948	1	VDNKFYKEVLYASYEITVLPNLNDTQLYAFISSLIN			187	0.00194769	1	VDNKFNKEWTAAVCEICLLPNLNGNQESAFVGSLAD							0.001	0.0026065		0.001	0.00308121		0.00299948	0.001		0.00294768	0.001
188	0.00119208	1	VDNKFNKEVCDAYAQIGNLPNLNAFQIDAFLGSLFD			188	0.000833931	1	VDNKFTKELFNAAFEIVSLPNLNDYQVLAFLHSLRD			188	0.00199948	1	VDNKFYKEVDSAVFEIHFLPNLNDAQRIAFIFSLFD			188	0.00194769	1	VDNKFNKEWTAAVCEIVNLPNLNENQGDAFIDSLFD							0.00219208	0.001		0.001	0.001		0.001	0.001		0.001	0.0117675
189	0.00119208	1	VDNKFNKEVCDAYAQIGNLPNLNGNQMTAFVNSLCN			189	0.000833931	1	VDNKFTKEVPNASDQIFLLPNLNDDQVLAFINSLRN			189	0.00199948	1	VDNKFYKEVADAFSQICYLPNLNRDQKCAFIFSLFD			189	0.00194769	1	VDNKFNKEWTAASYQILLLPNLNGSQQSAFLASLVN							0.00219208	0.001		0.001	0.00516242		0.001	0.001		0.001	0.00279459
190	0.00119208	1	VDNKFNKEVCDAYAQIGNLPNLNGTQRGAFVGSLDN			190	0.000833931	1	VDNKFTKDVPNASDQIFLLPNLNDYQVLAFLHSLRD			190	0.00199948	1	VDNKFYKEVVDATIEIHYLPNLNRDQKCAFIFSLFD			190	0.00194769	1	VDNKFNKEWTYAVTEILSLAELKRRSEVCLRQQPDQ							0.0069604	0.00903252		0.001	0.001		0.001	0.001		0.00294768	0.001
191	0.00119208	1	VDNKFNKEVCDAYAQIGNLPNLNGIQERAFLFSLHN			191	0.000833931	1	VDNKFTKGVPNASDQIFLLPNLNDYQVLAFLHSLRD			191	0.00199948	1	VDNKFYKEVYNAVLEIVVLPNLNHSQRYAFLSSLAD			191	0.00194769	1	VDNKFNKEWTYAVDEILLLPNLNGYQGVAFVCSLTD							0.001	0.00742601		0.001	0.00308121		0.001	0.001		0.001	0.001
192	0.00119208	1	VDNKFNKEVCDAYAQIGNLPNLNGLQEPAFLRSLDN			192	0.000833931	1	VDNKFTK*VPNASDQIFLLPNLNDYQVLAFLHSLRD			192	0.00199948	1	VDNKFYKEVCDAIHEIHYLPNLNRDQKCAFIFSLFD			192	0.00194769	1	VDNKFNKEWTYAIPEISALPNLNPCQEDAFILSLSN							0.00338416	0.001		0.001	0.001		0.001	0.00293446		0.001	0.00458918
193	0.00119208	1	VDNKFNKEVCDAYAQIGNLPNLNGGQIVAFIRSLDN			193	0.000833931	1	VDNKFTKEVPNASDQIFLLPNLNDYQVLAFLHSLRD			193	0.00199948	1	VDNKFYKEWNDAIDQIVSLRT*TSIRELPSSLA*SM			193	0.00194769	1	VDNKFNKEWTYAADQILHLPNLNDLQGYAFVSSLLD							0.001	0.0026065		0.001	0.00308121		0.001	0.001		0.001	0.001
194	0.00119208	1	VDNKFNKEVCDAYAQIGNLPNLNGGQRVAFIDSLGN			194	0.000833931	1	VDNKFTKEVINAYYELIPCRT*TSARCTPSYPACTT			194	0.00199948	1	VDNKFYKEWTDATIEICSLPNLNGHQERAFVNSLVD			194	0.00194769	1	VDNKFNKEWTYASCQITALPNLNQFQGDAFVSSLDD							0.00219208	0.001		0.001	0.001		0.001	0.001		0.001	0.001
195	0.00119208	1	VDNKFNKEVCDAYAQIGNLPNLNGGQGSAFIDSLCD			195	0.000833931	1	VDNKFTKEVDSAVFEIHILPNLNDYQRVAFIFSLFD			195	0.00199948	1	VDNKFYKEWSAAAFEICTLPNLNEYQGFAFVDSLAN			195	0.00194769	1	VDNKFNKEWTSATAEILDLPNLNGHQESAFLGSLRN							0.00219208	0.001		0.001	0.00724363		0.001	0.001		0.001	0.001
196	0.00119208	1	VDNKFNKEVCDAYAQIGNLPNLNGGQGSAFIGSLYD			196	0.000833931	1	VDNKFTKEWTNASFQILHLPNLNDIQVNAFLSSLVN			196	0.00199948	1	VDNKFYKEWIAATVEIIDLPNLNDGQGCAFVPSLYN			196	0.00194769	1	VDNKFNKEWTSAIHQICRLPNLNVGQGFAFVSSLPD							0.001	0.0026065		0.001	0.00308121		0.001	0.001		0.001	0.00279459
197	0.00119208	1	VDNKFNKEVCDAYAQIGNLPNLNGCQLYAFLRSLSD			197	0.000833931	1	VDNKFTKEWSYANLQIHCLPNLNRFQRHAFVCSLVD			197	0.00199948	1	VDNKFYKEWIAASVEISRLPNLNDSQVNAFVISLGD			197	0.00194769	1	VDNKFNKEWTSASAQILDLPNLNVDQESAFISSLSD							0.001	0.0026065		0.00266786	0.001		0.001	0.001		0.001	0.001
198	0.00119208	1	VDNKFNKEVCDAYAQIGNLPNLNGCQKSAFVFSLRD			198	0.000833931	1	VDNKFTKEWRYASVQILNLPNLNHVQVNAFVSSLVD			198	0.00199948	1	VDNKFYKEWIYATAQINDLPNLNDTQEFAFLGSLND			198	0.00194769	1	VDNKFNKEWTNATNQILILPNLNEAQGRAFVASLAN							0.00219208	0.001		0.0627109	0.040543		0.001	0.001		0.001	0.001
199	0.00119208	1	VDNKFNKEVCDAYAQIGNLPNLNGNQGLAFVTSLIN			199	0.000833931	1	VDNKFTKEWLAAVDQIIILPNLNDYQVLAFLHSLRD			199	0.00199948	1	VDNKFYKEWIYAVCEIHFLPNLNLSQRCAFIFSLFD			199	0.00194769	1	VDNKFNKEWTNATVEILSLPNLNGNQVRAFVGSLPD							0.00219208	0.001		0.001	0.001		0.001	0.001		0.001	0.00279459
200	0.00119208	1	VDNKFNKEVCDAYAQIGNLPNLNGNQRPAFVDSLPD			200	0.000833931	1	VDNKFTKEWDDAIAQICRLPNLNGVQKGAFVSSLPD			200	0.00199948	1	VDNKFYKEWHAAIGQIGNLPNLNADQGYAFVVSLPD			200	0.00194769	1	VDNKFNKEWTNAAHQICRLPNLNLGQGRAFVGSLSD							0.001	0.0026065		0.00266786	0.00308121		0.001	0.001		0.001	0.00458918
201	0.00119208	1	VDNKFNKEVCDAYAQIGNLPNLNGIQKFAFVGSLGD			201	0.000833931	1	VDNKFTKEWDSASYEIINLPNLNGSQMGAFLSSLSD			201	0.00199948	1	VDNKFYKEWHAAVCEIVGLPNLNLVQGVAFLFSLSD			201	0.00194769	1	VDNKFNKEWTNAASEILCLPNLNQGQGCAFLSSLCD							0.001	0.0026065		0.00266786	0.001		0.001	0.00293446		0.001	0.001
202	0.00119208	1	VDNKFNKEVCDAYAQIGNLPNLNGPQMDAFVFSLVN			202	0.000833931	1	VDNKFTKEWGNAVCQIIILPNLNASQGFAFVYSLVN			202	0.00199948	1	VDNKFYKEWRAATRQIFRLPNLNGDQEGAFVVSLAN			202	0.00194769	1	VDNKFNKEWTNASVQILILPNLNEHQMSAFVRSLNN							0.00219208	0.001		0.00433572	0.00308121		0.001	0.001		0.001	0.00458918
203	0.00119208	1	VDNKFNKEVCDAYAQIGNLPNLNGDQRVAFINSLGD			203	0.000833931	1	VDNKFTKELHNAVFQILHLPNLNELQEIAFVNSLLN			203	0.00199948	1	VDNKFYKEWLNAANEILGLPNLNQIQELAFVNSLRN			203	0.00194769	1	VDNKFNKEWTNATGEILALPNYPTQLDAFVGSLAN							0.00219208	0.001		0.00266786	0.001		0.001	0.00293446		0.00489537	0.001
204	0.00119208	1	VDNKFNKEVCDAYAQIGNLPNLNGAQMSAFIVSLHN			204	0.000833931	1	VDNKFSKEVPNASDQIFLLPNLNDYQVLAFLHSLRD			204	0.00199948	1	VDNKFYKEWLSAVAQISVLPNLNDSQGRAFVVSLVD			204	0.00194769	1	VDNKFNKEWTNATFEICCLPNLNPDQRDAFIPSLCD							0.001	0.0026065		0.00266786	0.001		0.604843	0.113199		0.001	0.00279459
205	0.00119208	1	VDNKFNKEVCDAYAQIGNLPNLNGVQRPAFVVSLFD			205	0.000833931	1	VDNKFIKEVPNASDQIFLLPNLNDYQVLAFLHSLRD			205	0.00199948	1	VDNKFYKEWDTATREICSLPNLNDNQGYAFLYSLVD			205	0.00194769	1	VDNKFNKEWTNAIYEISVLPNLNVCQGSAFIHSLGD							0.00219208	0.001		0.00266786	0.001		0.001	0.001		0.001	0.001
206	0.00119208	1	VDNKFNKEVCDAYAQIGNLPNLNGYQGLAFIDSLID			206	0.000833931	1	VDNKFYKEGNDAAYQIDHLPNLNVFQRIAFVYSLFD			206	0.00199948	1	VDNKFYKEWDTASCQILNLPNLNAVQRCAFVCSLFD			206	0.00194769	1	VDNKFNKEWTNAASEILLLPNLNGYQGVAFVCSLTD							0.00219208	0.001		0.001	0.001		0.001	0.001		0.001	0.001
207	0.00119208	1	VDNKFNKEVCDAYAQIGNLPNLNGSQGCAFVCSLSD			207	0.000833931	1	VDNKFYKEGTSAFSEICNLPNLNAFQQRAFIHSLSN			207	0.00199948	1	VDNKFYKEWDDAIGEIIGLPNLNGCQGGAFVVSLRD			207	0.00194769	1	VDNKFNKEWTNAVGQILDLPNLNRCQRAAFVFSLAN							0.00219208	0.001		0.001	0.001		0.001	0.001		0.00489537	0.001
208	0.00119208	1	VDNKFNKEVCDAYAQIGNLPNLNGCQRCAFLCSLLD			208	0.000833931	1	VDNKFYKEGPYAVLQISALPNLNPCQVCAFVRSLAN			208	0.00199948	1	VDNKFYKEWADAIFQIGRLPNLNLYQEGAFVDSLFD			208	0.00194769	1	VDNKFNKEWTNASAQILGLPNLNGGQRHAFVHSLCD							0.00219208	0.001		0.00266786	0.001		0.001	0.00293446		0.001	0.001
209	0.00119208	1	VDNKFNKEVCDAYAQIGNLPNLNVIQVCAFVNSLCN			209	0.000833931	1	VDNKFYKEVPNASDQIFLLPNLNLSQERAFIISLNN			209	0.00199948	1	VDNKFYKEWADASVEIVRLPNLNACQEYAFLNSLND			209	0.00194769	1	VDNKFNKEWTTATNQICALPNLNHPQGSAFLHSLRD							0.0141129	0.0122455		0.001	0.00308121		0.001	0.001		0.001	0.001
210	0.00119208	1	VDNKFNKEVCDAYAQIGNLPNLNVPQGVAFIPSLGD			210	0.000833931	1	VDNKFYKEVYYAFFEILTLPNLNDIQRTAFIGSLRN			210	0.00199948	1	VDNKFYKEWADANYQITYLPNLNQGQGHAFIISLVD			210	0.00194769	1	VDNKFNKEWTTASVQIASLPNLNRYQGFAFVSSLDD							0.00576832	0.00742601		0.001	0.00516242		0.00499896	0.001		0.001	0.00279459
211	0.00119208	1	VDNKFNKEVCDAYAQIGNLPNLNVGQGGAFICSLDD			211	0.000833931	1	VDNKFYKEWNYAIRQISGLPNLNVDQGDAFVYSLVD			211	0.00199948	1	VDNKFYKEWGYAAVQICGLPNLNGCQEDAFVGSLSN			211	0.00194769	1	VDNKFNKEWTTAVGEILTLPNLNGGQEAAFLGSLDD							0.001	0.00421301		0.001	0.00308121		0.001	0.001		0.001	0.001
212	0.00119208	1	VDNKFNKEVCDAYAQIGNLPNLNV*QIVAFIRSLDN			212	0.000833931	1	VDNKFYKEWSAASAQIVLLPNLNGSQQCAFVGSLHN			212	0.00199948	1	VDNKFYKEWVTAVTEIGCLPNLNVGQGGAFLGSLGN			212	0.00194769	1	VDNKFNKEWTDATNQICYLPNLNDGQMHAFLGSLRD							0.00219208	0.001		0.001	0.001		0.001	0.00293446		0.001	0.001
213	0.00119208	1	VDNKFNKEVCDAYAQIGNLPNLNVYQKSAFIRSLDN			213	0.000833931	1	VDNKFYKEWIDASYQISTLPNLNLTQGSAFVCSLPD			213	0.00199948	1	VDNKFYKEWYDAFAQICSLPNLNLYQGGAFIASLGD			213	0.00194769	1	VDNKFNKEWTDAISQILYLPNLNVGQGCAFIISLGN							0.001	0.0026065		0.001	0.001		0.001	0.00293446		0.00294768	0.00279459
214	0.00119208	1	VDNKFNKEVCDAYAQIGNLPNLNVYQTVAFIRSLDN			214	0.000833931	1	VDNKFYKEWHAASVQICSLPNLNLFQEDAFVFSLSD			214	0.00199948	1	VDNKFYKEWSDATVQIVILPNLNVSQENAFVISLAD			214	0.00194769	1	VDNKFNKEWTDASIQILCLPNLNRGQGGAFVSGLPN							0.00219208	0.0026065		0.001	0.00516242		0.001	0.001		0.001	0.001
215	0.00119208	1	VDNKFNKEVCDAYAQIGNLPNLNVYQRIAFIFSLFD			215	0.000833931	1	VDNKFYKEWRNAVHEICDLPNLNLGQVPAFVASLGN			215	0.00199948	1	VDNKFYKEWSNAVVEISDLPNLNGRQKTAFVVSLCN			215	0.00194769	1	VDNKFNKEWTDASIQILCLPNLNGGQMPAFIFSLYD							0.00219208	0.001		0.001	0.001		0.001	0.00293446		0.001	0.001
216	0.00119208	1	VDNKFNKEVCDAYAQIGNLPNLNVYQITAFVRSLDN			216	0.000833931	1	VDNKFYKEWRAAFPQIDNLPNLNRVQGPAFLASLRD			216	0.00199948	1	VDNKFYKEWCDAAHEIGSLPNLNLGQLPAFVYSLGN			216	0.00194769	1	VDNKFNKEWTDASREICRLPNLNAFQGCAFVRSLRD							0.00338416	0.001		0.001	0.001		0.00299948	0.001		0.001	0.001
217	0.00119208	1	VDNKFNKEVCDAYAQIGNLPNLNVYQISAFICSLDD			217	0.000833931	1	VDNKFYKEWRSAAYQICILPNLNEGQEIAFVRSLSD			217	0.00199948	1	VDNKFYKEWCAAARQISSLPNLNGYQEAAFIDSLGN			217	0.00194769	1	VDNKFNKEWTDATLEILGLPNLNANQVPAFIVSLYD							0.00338416	0.001		0.001	0.001		0.001	0.001		0.001	0.00279459
218	0.00119208	1	VDNKFNKEVCDAYAQIGNLPNLNVYQIIAFVRSLSD			218	0.000833931	1	VDNKFYKEWDYASYQICNLPNLNDFQIGAFIPSLYN			218	0.00199948	1	VDNKFYKEWCTAVSEIVCLPNLNVDQVSAFVPSLTN			218	0.00194769	1	VDNKFNKEWTDAIAQICTLPNLNGTQQVAFLVSLPD							0.001	0.0026065		0.001	0.00308121		0.001	0.00293446		0.001	0.00279459
219	0.00119208	1	VDNKFNKEVCDAYAQIGNLPNLNVYQILAFVLSLNN			219	0.000833931	1	VDNKFYKEWDSAVHEIVALPNLNEFQEVAFLDSLDD			219	0.00199948	1	VDNKFYKEWCTASVQICRLPNLNGRQRSAFIPSLVD			219	0.00194769	1	VDNKFNKEWTDAAIEIASLPNLNGYQECAFICSLDN							0.001	0.00421301		0.001	0.00516242		0.001	0.00293446		0.001	0.001
220	0.00119208	1	VDNKFNKEVCDAYAQIGNLPNLNVYQILAFVLSLHN			220	0.000833931	1	VDNKFYKEWATASDQILFLPNLNVDQKCAFVASLDD			220	0.00199948	1	VDNKFYKEWCYAVSEIVCLPNLNACQKNAFVGSLPD			220	0.00194769	1	VDNKFNKEWTDAAAQIAALPNLNGSQGGAFLVSLAD							0.00219208	0.001		0.001	0.001		0.001	0.00293446		0.001	0.001
221	0.00119208	1	VDNKFNKEVCDAYAQIGNLPNLNVYQILAFVLSLAD			221	0.000833931	1	VDNKFYKEWCNAFPEIRALPNLNRDQECAFLNSLGD			221	0.00199948	1	VDNKFYKEWCYATNEIIRLPNLNGTQVFAFVGSLSN			221	0.00194769	1	VDNKFNKEWTDAVREITSLPNLNHYQGCAFVTSLDN							0.00219208	0.001		0.001	0.001		0.001	0.001		0.001	0.001
222	0.00119208	1	VDNKFNKEVCDAYAQIGNLPNLNVYQILAFVDSLRD			222	0.000833931	1	VDNKFYKELNYANVEITDRRT*TAIRELPSLAA*VM			222	0.00199948	1	VDNKFYKEWCSASCQILSLPNLNHCQGSAFINSLHD			222	0.00194769	1	VDNKFNKEWTDASIQIISLPNLNVGQEDAFVFSLDN							0.00219208	0.001		0.001	0.001		0.001	0.001		0.001	0.00279459
223	0.00119208	1	VDNKFNKEVCDAYAQIGNLPNLNVYQIDAFIRSLDN			223	0.000833931	1	VDNKFYKELCSAANEIFVLPNLNDYQVLAFLHSLRD			223	0.00199948	1	VDNKFYKELSYAVGEINTLPNLNAFQQCAFVNSLCN			223	0.00194769	1	VDNKFNKEWTDASIQIISLPNLNQCQRGAFVNSLDD							0.001	0.0026065		0.0243501	0.0218121		0.001	0.00293446		0.001	0.001
224	0.00119208	1	VDNKFNKEVCDAYAQIGNLPNLNVYQIDAFLCSLDD			224	0.000833931	1	VDNKFYKELCSAADEIFILPNLNDYQVLAFLHSLRD			224	0.00199948	1	VDNKFYKELSTAVYEIFALPNLNPSQRLAFIFSLFD			224	0.00194769	1	VDNKFNKEWTDASIQIISLPNLNQCQRGAFVDSLTD							0.00219208	0.001		0.001	0.001		0.001	0.00293446		0.001	0.001
225	0.00119208	1	VDNKFNKEVCDAYAQIGNLPNLNVYQIAAFISSLVD			225	0.000833931	1	VDNKFYKELCSAADEIFVLPNLNDDQVLAFINSLRN			225	0.00199948	1	VDNKFYKELSTAVYEIFALPNLNDYQRVAFIFSLFD			225	0.00194769	1	VDNKFNKEWTDASIQIISLPNLNEGQGSAFVNSLHD							0.00219208	0.001		0.001	0.001		0.001	0.001		0.00294768	0.0117675
226	0.00119208	1	VDNKFNKEVCDAYAQIGNLPNLNVYQIGAFIFSLNN			226	0.000833931	1	VDNKFYKELCSAADEILVLPNLNDDQVLAFINSLRN			226	0.00199948	1	VDNKFYKELSTAVYEIFALPNLNESQVVAFICSLFD			226	0.00194769	1	VDNKFNKEWTDAFHQIFGLPNLNDSQGTAFLCSLNN							0.00219208	0.001		0.00266786	0.001		0.001	0.001		0.001	0.001
227	0.00119208	1	VDNKFNKEVCDAYAQIGNLPNLNVYQIVAFVDSLRD			227	0.000833931	1	VDNKFYKELCSAADEIFLLPNLNDDQVLAFINSLRN			227	0.00199948	1	VDNKFYKELSTAVYEIFALPNLNESQVVAFIFSLFD			227	0.00194769	1	VDNKFNKEWTAATSEICGLPNLNDRQERAFLYSLGD							0.00219208	0.001		0.001	0.001		0.001	0.00293446		0.001	0.001
228	0.00119208	1	VDNKFNKEVCDAYAQIGNLPNLNVYQIVPFIRSLDN			228	0.000833931	1	VDNKFYKELCSAADEIFLLPNLNDDQVLAFINSLCN			228	0.00199948	1	VDNKFYKELSTAVYEIFALPNLNESQVVAFIFSLFD			228	0.00194769	1	VDNKFNKEWTAATHEILTLPNLNACQEDAFVGSLTN							0.001	0.0026065		0.00266786	0.001		0.001	0.001		0.001	0.001
229	0.00119208	1	VDNKFNKEVCDAYAQIGNLPNLNVYQIVALIRSLDN			229	0.000833931	1	VDNKFYKELCSAADEIFALPNLNDDQVLAFINSLRN			229	0.00199948	1	VDNKFYKELSTAVYEIFALPNLNESQVVAFVVSLFD			229	0.00194769	1	VDNKFNKEWTAAICEITNLPNLNVDQELAFVDSLDN							0.00219208	0.001		0.001	0.00308121		0.0709818	0.262152		0.00294768	0.001
230	0.00119208	1	VDNKFNKEVCDAYAQIGNLPNLNVYQIVAFSRSLDN			230	0.000833931	1	VDNKFYKELCSAADEIFVMPNLNDDQVLAFINSLRN			230	0.00199948	1	VDNKFYKELSTAVYEIFALPNLNESQVVAFVVSLCD			230	0.00194769	1	VDNKFNKEWTAAAAEICDLPNLNRGQGNAFIYSLDN							0.001	0.0026065		0.001	0.001		0.001	0.001		0.001	0.001
231	0.00119208	1	VDNKFNKEVCDAYAQIGNLPNLNVYQIVAFIISLFD			231	0.000833931	1	VDNKFYKELCSAADEIFVLPNLNDDQVLAFINSLRN			231	0.00199948	1	VDNKFYKELHSAIYQIFSLPNLNDAQRIAFIFSLFD			231	0.00194769	1	VDNKFNKEWTAASHQIDNLPNLNDDQGGAFLPSLGN							0.00219208	0.001		0.00266786	0.001		0.001	0.00293446		0.00294768	0.001
232	0.00119208	1	VDNKFNKEVCDAYAQIGNLPNLNVYQIVAFIDSLSD			232	0.000833931	1	VDNKFYKELCSAADEIFVLTNLNDDQVLAFINSLRN			232	0.00199948	1	VDNKFYKELHSAIYQIFSLPNLNANQVIAFIFSLFD			232	0.00194769	1	VDNKFNKEWTAASIQILRLPNLNPIQGSAFVNSLYN							0.00219208	0.001		0.001	0.00308121		0.001	0.001		0.001	0.001
233	0.00119208	1	VDNKFNKEVCDAYAQIGNLPNLNVYQIVAFIVSLHD			233	0.000833931	1	VDNKFYKELCSAADEIFVLQNLNDDQVLAFINSLRN			233	0.00199948	1	VDNKFYKELHDAIFEIFSLPNLNANQVIAFVCSLFD			233	0.00194769	1	VDNKFNKEWTAFIRSLID							0.00457624	0.0026065		0.001	0.001		0.0109974	0.00293446		0.001	0.001
234	0.00119208	1	VDNKFNKEVCDAYAQIGNLPNLNVYQIVAFICSLSD			234	0.000833931	1	VDNKFYKELCSAADEIFVLQNLNDYQVLAFLHSLRD			234	0.00199948	1	VDNKFYKELPDAIFEIFRLPNLNANQVIAFVCSLFD			234	0.00194769	1	VDNKFNKEWTAATDQIASLPNLNDIQEGAFVRSLLD							0.00338416	0.001		0.00266786	0.00724363		0.001	0.001		0.001	0.00279459
235	0.00119208	1	VDNKFNKEVCDAYAQIGNLPNLNVYQIVAFIFSLRD			235	0.000833931	1	VDNKFYKELCSAADEIFVLPNLNDYQVLAFLHSLRD			235	0.00199948	1	VDNKFYKELPDAIFEIFSLPNLNDAQRIAFIFSLFD			235	0.00194769	1	VDNKFNKEWTAATGQILYLPNLNADQEPAFIGSLVD							0.001	0.0026065		0.00266786	0.001		0.001	0.00293446		0.001	0.001
236	0.00119208	1	VDNKFNKEVCDAYAQIGNLPNLNVYQIVAFIFSLDN			236	0.000833931	1	VDNKFYKELCSAADEIFVLPNLNLSQERAFIISLRD			236	0.00199948	1	VDNKFYKELPDAIFEIFSLPNLNENQVIAFVCSLFD			236	0.00194769	1	VDNKFNKEWTAAISEICVLPNLNPVQEDAFVSSLHN							0.00219208	0.0026065		0.00266786	0.001		0.001	0.001		0.001	0.00279459
237	0.00119208	1	VDNKFNKEVCDAYAQIGNLPNLNVYQIVAFIISLDN			237	0.000833931	1	VDNKFYKELCSAADEIFVLPNLNLSQVLAFLHSLRD			237	0.00199948	1	VDNKFYKELPDAIFEIFSLPNLNESQVVAFVVSLFD			237	0.00194769	1	VDNKFNKEWTAAIDEIAVLPNLNEHQGVAFISSLGD							0.00338416	0.0026065		0.00266786	0.001		0.001	0.001		0.00294768	0.001
238	0.00119208	1	VDNKFNKEVCDAYAQIGNLPNLNVYQIVAFIPSLPN			238	0.000833931	1	VDNKFYKELCSAADEIFVLPNLNDDQVIAFINSLRN			238	0.00199948	1	VDNKFYKELPDAIFEIFSLPNLNANQVIAFVCSPFD			238	0.00194769	1	VDNKFNKEWTAAACQIANLPNLNGGQEVAFLGSLLN							0.00219208	0.001		0.001	0.001		0.001	0.001		0.001	0.001
239	0.00119208	1	VDNKFNKEVCDAYAQIGNLPNLNVYQIVAFIASLGD			239	0.000833931	1	VDNKFYKELCSAADEIFVLPNLNDDQVLAFINRLRN			239	0.00199948	1	VDNKFYKELPDAIFEIFSLPNLNANQVIAFVCSLFD			239	0.00194769	1	VDNKFNKEWTAASAEICRLPNLNRGQGHAFIGSLCD							0.00219208	0.001		0.00266786	0.001		0.001	0.001		0.001	0.00638377
240	0.00119208	1	VDNKFNKEVCDAYAQIGNLPNLNVYQIVAFIGSLTD			240	0.000833931	1	VDNKFYKELCSAADEIFVLPNLNDDQVLAFINSMRN			240	0.00199948	1	VDNKFYKELPDAIFEIFSLPNLNANQVIAFVCSLCD			240	0.00194769	1	VDNKFNKEWTYASAQICDLPNLNAYQGIAFINSLVN							0.00219208	0.001		0.001	0.001		0.001	0.00293446		0.001	0.00279459
241	0.00119208	1	VDNKFNKEVCDAYAQIGNLPNLNVYQIVAFIGSLGN			241	0.000833931	1	VDNKFYKELCSAADEIFVLPNLNDDQVLAFINSLRN			241	0.00199948	1	VDNKFYKELPDAIFEIFSLPNLNANQVIAFVCSLFD			241	0.00194769	1	VDNKFNKEWTYASDEICRLPNLNACQETAFICSLNN							0.00219208	0.001		0.001	0.001		0.001	0.001		0.001	0.001
242	0.00119208	1	VDNKFNKEVCDAYAQIGNLPNLNVYQIVAFIVSLCD			242	0.000833931	1	VDNKFYKELCSAADEIFVLPNLNDDQVLAFINSLCN			242	0.00199948	1	VDNKFYKELPDAIFEIFSLPNLNANQVIAFVISLFD			242	0.00194769	1	VDNKFNKEWTYASSQIRPLPNLNRDQLFAFVGSLGD							0.001	0.0026065		0.001	0.001		0.001	0.00486892		0.001	0.00279459
243	0.00119208	1	VDNKFNKEVCDAYAQIGNLPNLNVYQIVAFICSLTD			243	0.000833931	1	VDNKFYKELCSAADEIFVLPNLNDDQVLAFLHSLNN			243	0.00199948	1	VDNKFYKELPDAIFEIFSLPNLNANQVVAFVVSLFD			243	0.00194769	1	VDNKFNKEWTYASSQIRPLLNLNRDQLFAFVGSLGD							0.00338416	0.001		0.001	0.001		0.001	0.001		0.00294768	0.001
244	0.00119208	1	VDNKFNKEVCDAYAQIGNLPNLNVYQIVAFIFSLTN			244	0.000833931	1	VDNKFYKELCSAADEIFVLPNLNDDQVLAFVNSLFD			244	0.00199948	1	VDNKFYKELPDAIFEIFSLPNLNANQLIAFVCSLFD			244	0.00194769	1	VDNKFNKEWTYATLQIVTLPNLNELQVRAFVCSLVN							0.00815248	0.00581951		0.001	0.00308121		0.00299948	0.00293446		0.001	0.001
245	0.00119208	1	VDNKFNKEVCDAYAQIGNLPNLNVYQIVAFIFSLSG			245	0.000833931	1	VDNKFYKELCSAADEIFVLPNLNDDHVLAFLHSLRD			245	0.00199948	1	VDNKFYKELYTAIYEIFVLPNLNESQIIAFVNSLFD			245	0.00194769	1	VDNKFNKEWTYAISQILALPNLNGCQGVAFVSSLHD							0.00338416	0.001		0.001	0.001		0.001	0.00293446		0.00294768	0.001
246	0.00119208	1	VDNKFNKEVCDAYAQIGNLPNLNVYQIVAFINSLRD			246	0.000833931	1	VDNKFYKELCSAADEIFVLPNLNDYQVLAFINSLRD			246	0.00199948	1	VDNKFYKELYTAVVQIFSLPNLNEHQVCAFICSLFD			246	0.00194769	1	VDNKFNKEWTYAVNQICRLPNLNGCQGSAFVVSLVN							0.00338416	0.001		0.001	0.001		0.001	0.001		0.001	0.001
247	0.00119208	1	VDNKFNKEVCDAYAQIGNLPNLNVYQIVAFITSLDN			247	0.000833931	1	VDNKFYKELCSAADEIFVLPNLNDYQVLAFLHSLPNLNLSQERAFIISLNN			247	0.00199948	1	VDNKFYKELCDAIVEIHFLPNLNVDQRHAFIFSLFD			247	0.00194769	1	VDNKFNKEWTYAVHQICFLPNLNGSQEHAFIGSLVN							0.00219208	0.0026065		0.00266786	0.001		0.001	0.001		0.001	0.001
248	0.00119208	1	VDNKFNKEVCDAYAQIGNLPNLNVYQIVAFITSLFD			248	0.000833931	1	VDNKFYKELCSAADEIFVLPNLNDYHVLAFLHSLRD			248	0.00199948	1	VDNKFYKELFNAICQIFGLPNLNENQIVAFIISLFD			248	0.00194769	1	VDNKFNKEWTYAVDEIFRLPNLNAAQEPAFVSSLFD							0.00219208	0.001		0.001	0.001		0.001	0.00486892		0.001	0.001
249	0.00119208	1	VDNKFNKEVCDAYAQIGNLPNLNVYQIVAFIHSLSD			249	0.000833931	1	VDNKFYKELCSAADEIFVLPNLNYDQVLAFINSLRN			249	0.00199948	1	VDNKFYKELFNAICQIFGLPNLNENQIVAFIISLFD			249	0.00194769	1	VDNKFNKEWTYASNQICTLPNLNQPQVHAFVGSLLE							0.001	0.0026065		0.00266786	0.001		0.001	0.00486892		0.00294768	0.00638377
250	0.00119208	1	VDNKFNKEVCDAYAQIGNLPNLNVYQIVAFIPSLDN			250	0.000833931	1	VDNKFYKELCSAADEIFVLPNLDDDQVLAFINSLRN			250	0.00199948	1	VDNKFYKELFNAICQIFGLPNLNENQIVAFIFSLFD			250	0.00194769	1	VDNKFNKEWTYASTQICGLPNLNRDQGDAFIPSLYD							0.001	0.00581951		0.001	0.001		0.001	0.00293446		0.00294768	0.001
251	0.00119208	1	VDNKFNKEVCDAYAQIGNLPNLNVYQIVAFIRNLDN			251	0.000833931	1	VDNKFYKELCSAADEIFVLPNLNDDQVLAFINSLRN			251	0.00199948	1	VDNKFYKELFNAIYEIFGLPNLNDAQRIAFIFSLFD			251	0.00194769	1	VDNKFNKEWTYASAQICHLPNLNGSQMDAFVGSLPD							0.00219208	0.001		0.00266786	0.00308121		0.001	0.001		0.001	0.001
252	0.00119208	1	VDNKFNKEVCDAYAQIGNLPNLNVYQIVAFIRRLDN			252	0.000833931	1	VDNKFYKELCSAADEIFFLPNLNDDQVLAFINSLRN			252	0.00199948	1	VDNKFYKELFNAISQIFSLPNLNEFQVRAFVCSLFD			252	0.00194769	1	VDNKFNKEWTYASCQILLLPNLNVYQGSAFIRSLCD							0.00576832	0.00581951		0.00266786	0.00932484		0.001	0.001		0.001	0.001
253	0.00119208	1	VDNKFNKEVCDAYAQIGNLPNLNVYQIVAFIRSRDN			253	0.000833931	1	VDNKFYKELCSASDEIFVLPNLNDDQVLAFINSLRN			253	0.00199948	1	VDNKFYKELFAAVCQIICLPNLNGCQQGAFVGSLFD			253	0.00194769	1	VDNKFNKEWTSATHQILTLPNLNGTQEAAFISSLCN							0.001	0.0026065		0.001	0.001		0.001	0.001		0.00489537	0.00279459
254	0.00119208	1	VDNKFNKEVCDAYAQIGNLPNLNVYQIVAFIRSLND			254	0.000833931	1	VDNKFYKELFNAAFEIVSLPNLNLSQERAFIISLRN			254	0.00199948	1	VDNKFYKELFYASFEIILLPNLNLSQKHAFLCSLCN			254	0.00194769	1	VDNKFNKEWTSATVQILHLPNLNEFQGTAFVISLGD							0.00576832	0.001		0.00266786	0.001		0.00699844	0.001		0.00294768	0.001
255	0.00119208	1	VDNKFNKEVCDAYAQIGNLPNLNVYQIVAFIRSLND			255	0.000833931	1	VDNKFYKELFNAAFEIVSLPNLNLSQERAFIISLRD			255	0.00199948	1	VDNKFSKEVVDATIEIHYLQNLNRDQKCAFIFSLFD			255	0.00194769	1	VDNKFNKEWTSAINQILSLPNLNVYQGYAFVRSLDD							0.00219208	0.001		0.001	0.001		0.00299948	0.001		0.001	0.00279459
256	0.00119208	1	VDNKFNKEVCDAYAQIGNLPNLNVYQIVAFIRSLTM			256	0.000833931	1	VDNKFYKELFNAAFQIVSLPNLNLSQERAFIISLNN			256	0.00199948	1	VDNKFSKEVVDATIEIHYLPNLNRDQKCAFIFSLFD			256	0.00194769	1	VDNKFNKEWTSAVCQILSLPNLNRFQEDAFVGSLPN							0.001	0.0026065		0.511366	0.506734		0.00499896	0.001		0.00489537	0.00638377
257	0.00119208	1	VDNKFNKEVCDAYAQIGNLPNLNVYQIVAFIRSLTN			257	0.000833931	1	VDNKFYKEGPSADTQINLLPNLNGCQGFAFVTSLRN			257	0.00199948	1	VDNKFSKEVVDATIEIHYLPNLNRDQKCAFIFSLFD			257	0.00194769	1	VDNKFNKEWTSAVCQILSLPNLNRFQEDAFVCSLVD							0.001	0.0026065		0.001	0.001		0.00299948	0.0184101		0.001	0.00279459
258	0.00119208	1	VDNKFNKEVCDAYAQIGNLPNLNVYQIVAFIRSLSN			258	0.000833931	1	VDNKFYKEVVDASVQIAALPNLNQGQGIAFVNSLVD			258	0.00199948	1	VDNKFSKEVVDAIHEIHFLPNLNDYQRVAFIFSLFD			258	0.00194769	1	VDNKFNKEWSNAVCEIVRLPNLNGCQGCAFLGSLVD							0.001	0.0026065		0.001	0.001		0.00499896	0.00486892		0.00294768	0.001
259	0.00119208	1	VDNKFNKEVCDAYAQIGNLPNLNVYQIVAFIRSLSD			259	0.000833931	1	VDNKFYKEWTSAFRQICGLPNLNPDQERAFIISLGD			259	0.00199948	1	VDNKFSKKVVDATIEIHYLPNLNRDQKCAFIFSLFD			259	0.00194769	1	VDNKFNKEWSNASGQILALPNLNQRQEIAFLRSLDD							0.001	0.0026065		0.00433572	0.00308121		0.001	0.001		0.001	0.001
260	0.00119208	1	VDNKFNKEVCDAYAQIGNLPNLNVYQIVAFIRSLSN			260	0.000833931	1	VDNKFYKEWSYASDEICGLPNLNECQGVAFLGSLND			260	0.00199948	1	VDNKFSKKVCDAIHEIHYLPNLNRDQKCAFIFSLFD			260	0.00194769	1	VDNKFNKEWSNATLEIISLPNLNRCQESAFVNSLCD							0.00219208	0.001		0.00266786	0.00308121		0.196949	0.0300169		0.00294768	0.001
261	0.00119208	1	VDNKFNKEVCDAYAQIGNLPNLNVYQIVAFIRSLHN			261	0.000833931	1	VDNKFYKEWIYAVSEILALPNLNGSQERAFVSSLCD			261	0.00199948	1	VDNKFSKEEVDATIEIHYLPNLNRDQKCAFIFSLFD			261	0.00194769	1	VDNKFNKEWSNAINQILSLPNLNLIQGGAFLFSLRN							0.00219208	0.001		0.001	0.001		0.001	0.00293446		0.00294768	0.001
262	0.00119208	1	VDNKFNKEVCDAYAQIGNLPNLNVYQIVAFIRSLHN			262	0.000833931	1	VDNKFYKEWHAFVVSLDD			262	0.00199948	1	VDNKFSKEAVDATIEIHYLPNLNRDQKCAFIFSLFD			262	0.00194769	1	VDNKFNKEWSNAIRQISGLPNLNGLQEDAFIHSLVN							0.001	0.0026065		0.00266786	0.00516242		0.001	0.001		0.001	0.001
263	0.00119208	1	VDNKFNKEVCDAYAQIGNLPNLNVYQIVAFIRSLPN			263	0.000833931	1	VDNKFYKEWDAAAAEICCLPNLNAFQGTAFLRSLGN			263	0.00199948	1	VDNKFSKEACDAIHEIHFLPNLNDAQRIAFIYSLHD			263	0.00194769	1	VDNKFNKEWSNAVNEIVHLPNLNVDQGGAFVNSLPN							0.00219208	0.001		0.001	0.001		0.001	0.001		0.001	0.001
264	0.00119208	1	VDNKFNKEVCDAYAQIGNLPNLNVYQIVAFIRSLRD			264	0.000833931	1	VDNKFYKEWAYASLQIAILPNLNEDQGAAFVSSLDD			264	0.00199948	1	VDNKFSKEGNTAVYEIDSLPNLNVHQKFAFIVSLAN			264	0.00194769	1	VDNKFNKEWSNAVHEICLLPNLNEAQGIAFIHSLDD							0.00219208	0.001		0.001	0.001		0.001	0.00293446		0.00294768	0.001
265	0.00119208	1	VDNKFNKEVCDAYAQIGNLPNLNVYQIVAFIRSLEM			265	0.000833931	1	VDNKFYKEWADATNQIVGLPNLNGPQQDAFLISLAD			265	0.00199948	1	VDNKFSKEGCSAIVQIHYLPNLNRDQKCAFIFSLFD			265	0.00194769	1	VDNKFNKEWSNASDEICALPNLNESGDCLPSQPGQ							0.00219208	0.001		0.00266786	0.001		0.001	0.001		0.001	0.00279459
266	0.00119208	1	VDNKFNKEVCDAYAQIGNLPNLNVYQIVAFIRSLDS			266	0.000833931	1	VDNKFYKEWGTASNEIICLPNLNLGQRPAFVVSLHD			266	0.00199948	1	VDNKFSKEGCSAIVQIHYLPNLNDYQRVAFIFSLFD			266	0.00194769	1	VDNKFNKEWSNASHEIICLPNLNVCQVDAFIDSLGD							0.00219208	0.001		0.001	0.00308121		0.001	0.001		0.001	0.001
267	0.00119208	1	VDNKFNKEVCDAYAQIGNLPNLNVYQIVAFIRSLDM			267	0.000833931	1	VDNKFYKEWSYASAQIRCLPNLNAVQGVAFIDSLVN			267	0.00199948	1	VDNKFSKEGCSAIVQIHYLPNLNANQVIAFVCSLFD			267	0.00194769	1	VDNKFNKEWSNASYEISRLPNLNHDQGGAFLGSLGN							0.001	0.0026065		0.00433572	0.00308121		0.001	0.001		0.001	0.00458918
268	0.00119208	1	VDNKFNKEVCDAYAQIGNLPNLNVYQIVAFIRSLDD			268	0.000833931	1	VDNKFYKEWCDASYQIFNLPNLNGNQMHAFVSSLGN			268	0.00199948	1	VDNKFSKEGCSAIVQIHYLPNLNVVQKVAFIFSLFD			268	0.00194769	1	VDNKFNKEWSTAVSQICCLPNLNVTQEIAFVDSLGD							0.001	0.00421301		0.001	0.001		0.001	0.001		0.001	0.001
269	0.00119208	1	VDNKFNKEVCDAYAQIGNLPNLNVYQIVAFIRSLDY			269	0.000833931	1	VDNKFYKEWCAASSEIVCQTRTR*TPSSLA*MT			269	0.00199948	1	VDNKFSKEGFNAFVEISRLPNLNLIQMNAFVNSLFD			269	0.00194769	1	VDNKFNKEWSTASAEIIALPNLNGCQRGAFVSSLGD							0.00457624	0.001		0.001	0.001		0.001	0.001		0.001	0.001
270	0.00119208	1	VDNKFNKEVCDAYAQIGNLPNLNVYQIVAFIRSLDD			270	0.000833931	1	VDNKFYKEWCSATVEIAVLPNLNVCQEDAFLCSLSN			270	0.00199948	1	VDNKFSKEVNDAYHEITRLPNLNDAQRIAFIFSLFD			270	0.00194769	1	VDNKFNKEWSTASAEIIALPNLNGCQERAFVFSLNN							0.001	0.0026065		0.001	0.001		0.00299948	0.001		0.001	0.00279459
271	0.00119208	1	VDNKFNKEVCDAYAQIGNLPNLNVYQIVAFIRSLAN			271	0.000833931	1	VDNKFYKELNDAAYQIATLPNLNDYQVLAFLHSLRD			271	0.00199948	1	VDNKFSKEVIDATIEIHYLPNLNRDQKCAFIFSLFD			271	0.00194769	1	VDNKFNKEWSTAAAQILDLPNLNASQGDAFVNSLSN							0.00219208	0.0026065		0.00266786	0.00516242		0.00499896	0.001		0.001	0.001
272	0.00119208	1	VDNKFNKEVCDAYAQIGNLPNLNVYQIVAFIRSLAN			272	0.000833931	1	VDNKFYKELNDAAYQIATLPNLNEVQERAFVNSLRN			272	0.00199948	1	VDNKFSKEVPDAIREIFILPNLNDAQRIAFIFSLFD			272	0.00194769	1	VDNKFNKEWSTASFQICALPNLNGRQMNAFVGSLLN							0.00219208	0.001		0.001	0.00308121		0.001	0.001		0.001	0.001
273	0.00119208	1	VDNKFNKEVCDAYAQIGNLPNLNVYQIVAFIRSLVD			273	0.000833931	1	VDNKFYKELNDAAYQIATLPNLNEVQERAFFNSLFD			273	0.00199948	1	VDNKFSKEVPDAIREIFILPNLNEGQVVAFVVSLFD			273	0.00194769	1	VDNKFNKEWSDATRQIIGLPNLNPCQGFAFLGSLSD							0.001	0.0026065		0.001	0.00308121		0.001	0.001		0.001	0.001
274	0.00119208	1	VDNKFNKEVCDAYAQIGNLPNLNVYQIVAFIRSLVD			274	0.000833931	1	VDNKFYKELDTAVDEIFFLPNLNDYQVLAFLHSLRD			274	0.00199948	1	VDNKFSKEVRNASGQISTLPNLNLGQGVAFIGSLYN			274	0.00194769	1	VDNKFNKEWSDAVFQIICLPNLNGGQETAFLGSLAD							0.00338416	0.0026065		0.001	0.001		0.00299948	0.001		0.00294768	0.00638377
275	0.00119208	1	VDNKFNKEVCDAYAQIGNLPNLNVYQIVAFIRSLYN			275	0.000833931	1	VDNKFYKELCSAADEIFVLPNLNDDQVLAFINSLRN			275	0.00199948	1	VDNKFSKEVRDAIHEIHFLPNLNDAQRIAFIFSLFD			275	0.00194769	1	VDNKFNKEWSDATDQIHRLPNLNGGQRAAFVNSLPD							0.001	0.0026065		0.00266786	0.001		0.001	0.001		0.001	0.001
276	0.00119208	1	VDNKFNKEVCDAYAQIGNLPNLNVYQIVAFIRSLYN			276	0.000833931	1	VDNKFSKEVVDATIEIHYLPNLNRDQKCAFIFSLFD			276	0.00199948	1	VDNKFSKEVLAAVHEIAILPNLNVGQMSAFVNSLCD			276	0.00194769	1	VDNKFNKEWSDATFQILGLPNLNEDQECAFLCSLGN							0.001	0.0026065		0.001	0.001		0.001	0.001		0.001	0.001
277	0.00119208	1	VDNKFNKEVCDAYAQIGNLPNLNVYQIVAFIRSLSD			277	0.000833931	1	VDNKFSKEVVDATIEIHYLPNLNDAQRIAFIFSLFD			277	0.00199948	1	VDNKFSKEVDSAVCEIHFLPNLNPSQRLAFIFSLFD			277	0.00194769	1	VDNKFNKEWSDAAFEIAALPNLNRSQGLAFVRSLDN							0.00338416	0.00742601		0.001	0.001		0.001	0.001		0.001	0.001
278	0.00119208	1	VDNKFNKEVCDAYAQIGNLPNLNVYQIVAFIRSLCD			278	0.000833931	1	VDNKFSKEVCDAYAQIGNLPNLNVYQIVAFIRSLDN			278	0.00199948	1	VDNKFSKEVDSAVFEIHILPNLNHDQVVAFVVSLFD			278	0.00194769	1	VDNKFNKEWSDAVIQICFLAELKRESEVRLRLQPA*							0.00457624	0.010639		0.001	0.00308121		0.001	0.001		0.00489537	0.00458918
279	0.00119208	1	VDNKFNKEVCDAYAQIGNLPNLNVYQIVAFIRSLWD			279	0.000833931	1	VDNKFSKEWNDAVSQICFLPNLNLDQGIAFVTSLSD			279	0.00199948	1	VDNKFSKEVDSAVFEIHILPNLNDYQRVAFVCSLFD			279	0.00194769	1	VDNKFNKEWSDASSEIVVLPNLNVHQRAAFVGSLSD							0.00219208	0.001		0.001	0.001		0.001	0.001		0.001	0.001
280	0.00119208	1	VDNKFNKEVCDAYAQIGNLPNLNVYQIVAFIRSLFN			280	0.000833931	1	VDNKFSKEWNDASVEIANLPKLKRGSADCLPFQPV*			280	0.00199948	1	VDNKFSKEVDSAVFEIHFLPNLNDAQRIAFIFSLFD			280	0.00194769	1	VDNKFNKEWSAAIVEIVNLPNLNVHQGPAFVSSLDN							0.00219208	0.001		0.001	0.00308121		0.001	0.00486892		0.001	0.00279459
281	0.00119208	1	VDNKFNKEVCDAYAQIGNLPNLNVYQIVAFIRSVDN			281	0.000833931	1	VDNKFSKEWSDAVREIVGLPNLNGCQVSAFIVSLSD			281	0.00199948	1	VDNKFSKEVGTAVAEIHFLPNLNQVQRVAFIFSLFD			281	0.00194769	1	VDNKFNKEWSAAVLEICCLPNLNAVQGTAFVSSLPD							0.00219208	0.001		0.00266786	0.001		0.001	0.001		0.001	0.001
282	0.00119208	1	VDNKFNKEVCDAYAQIGNLPNLNVYQIVAFIRSWTM			282	0.000833931	1	VDNKFSKEWDTASHEIINLPNLNRVQRGAFIVSLNN			282	0.00199948	1	VDNKFSKEVGTAVAEIHFLPNLNDAQRIAFIFSLFD			282	0.00194769	1	VDNKFNKEWSAASHQICCLPNLNRRQGSAFVGSLCN							0.00338416	0.001		0.001	0.00308121		0.001	0.001		0.00294768	0.001
283	0.00119208	1	VDNKFNKEVCDAYAQIGNLPNLNVYQIVAFIRSLSG			283	0.000833931	1	VDNKFSKEWAAASVEIVVLPNLNQCQRSAFVSSLGD			283	0.00199948	1	VDNKFSKEVVDATIEIHYLPNLNRDQKCAFIFSLFD			283	0.00194769	1	VDNKFNKEWSAAAAQIGSLPNLNRSRERLRRQPGQ							0.00219208	0.001		0.001	0.001		0.001	0.00293446		0.001	0.001
284	0.00119208	1	VDNKFNKEVCDAYAQIGNLPNLNVYQIVAFIRSL*D			284	0.000833931	1	VDNKFSKEWGYAAFEILNLPNLNLFQESAFISSLPN			284	0.00199948	1	VDNKFSKEVVDATIEITDLPNLNDAQRIAFIFSLFD			284	0.00194769	1	VDNKFNKEWSAAASQIVFLPNLNRAQLLAFLGSPFD							0.001	0.0026065		0.001	0.001		0.001	0.00293446		0.001	0.001
285	0.00119208	1	VDNKFNKEVCDAYAQIGNLPNLNVYQIVAFIRSLCD			285	0.000833931	1	VDNKFSKEWGYAAFEILNLPNLNVDQGNAFIGSLDD			285	0.00199948	1	VDNKFSKEVVDATIEITDLPNLNDVQRIAFIFSLFD			285	0.00194769	1	VDNKFNKEWSAAAFQILNLPNLNAYQITAFIDSLPN							0.00934456	0.00903252		0.001	0.001		0.001	0.001		0.00294768	0.001
286	0.00119208	1	VDNKFNKEVCDAYAQIGNLPNLNVYQIVAFIDSLRN			286	0.000833931	1	VDNKFSKEWSTASCQIGCLPNLNGTQGGAFIDSLAD			286	0.00199948	1	VDNKFSKEVVDATIEIHYLPNLNRDQKCAFIFSLGD			286	0.00194769	1	VDNKFNKEWSAAVREIVRLPNLNRCQGCAFVPSLHD							0.00219208	0.001		0.001	0.001		0.00299948	0.001		0.001	0.00279459
287	0.00119208	1	VDNKFNKEVCDAYAQIGNLPNLNVYQIVAFIASLVD			287	0.000833931	1	VDNKFSKEWCAAVNEICCLPNLNGGQERAFIGSLSD			287	0.00199948	1	VDNKFSKEVVDTTIEIHYLPNLNRDQKCAFIFSLFD			287	0.00194769	1	VDNKFNKEWSAAVNEIVRLPNLNHYQGGAFVCSLCD							0.001	0.0026065		0.001	0.00308121		0.001	0.00293446		0.001	0.001
288	0.00119208	1	VDNKFNKEVCDAYAQIGNLPNLNVYQIVAFIGSLCN			288	0.000833931	1	VDNKFSKELISAIIEISFLPNLNESQGRAFIGSLDD			288	0.00199948	1	VDNKFSKEVVDPTIEIHYLPNLNRDQKCAFIFSLFD			288	0.00194769	1	VDNKFNKEWSYAINQIADLPNLNAAQGPAFLVSLDD							0.001	0.0026065		0.001	0.001		0.00299948	0.001		0.001	0.001
289	0.00119208	1	VDNKFNKEVCDAYAQIGNLPNLNVYQIVAFIGSLFN			289	0.000833931	1	VDNKFSKELDNAVFEITVLPNLNGFQRAAFVLSLYN			289	0.00199948	1	VDNKFSKEVVDETIEIHYLPNLNRDQKCAFIFSLFD			289	0.00194769	1	VDNKFNKEWSYASLQITLLPNLNGDQETAFISSLDD							0.001	0.00421301		0.001	0.001		0.001	0.001		0.001	0.001
290	0.00119208	1	VDNKFNKEVCDAYAQIGNLPNLNVYQIVAFIGSLFD			290	0.000833931	1	VDNKFSKELVYAFDEICCLPNLNGVQMSAFLSSLGN			290	0.00199948	1	VDNKFSKEVVDETIEIHYLPNLNDAQRIAFIFSLFD			290	0.00194769	1	VDNKFNKEWSYASLQITLLPNLNGVQKDAFVYSLDD							0.00219208	0.001		0.001	0.001		0.00299948	0.00293446		0.001	0.001
291	0.00119208	1	VDNKFNKEVCDAYAQIGNLPNLNVYQIVAFIVSLYN			291	0.000833931	1	VDNKFSKEGVTAAIEIFYLPNLNARQKPAFLVSLCD			291	0.00199948	1	VDNKFSKEVVDATTEIHYLPNLNRDQKCAFIFSLFD			291	0.00194769	1	VDNKFNKEWSYATYQILSLPNLNHVQRNAFINSLGD							0.00338416	0.00421301		0.001	0.001		0.00299948	0.00293446		0.001	0.00458918
292	0.00119208	1	VDNKFNKEVCDAYAQIGNLPNLNVYQIVAFISSLYY			292	0.000833931	1	VDNKFSKEVLNAYSEIFLLPNLNVYQIVAFIRSLDN			292	0.00199948	1	VDNKFSKEVVDATSEIHYLPNLNRDQKCAFIFSLFD			292	0.00194769	1	VDNKFNKEWSYATYQILYLPNLNELQQQPGR							0.00457624	0.00421301		0.001	0.001		0.001	0.001		0.00294768	0.001
293	0.00119208	1	VDNKFNKEVCDAYAQIGNLPNLNVYQIVAFISSLSD			293	0.000833931	1	VDNKFSKEWTYAITQICGLPNLNHHQGNAFLSSLCD			293	0.00199948	1	VDNKFSKEVVDATIEIHYLPNLNRDQKCAFIFSLFD			293	0.00194769	1	VDNKFNKEWSYAIGQILALPNLNVVQKPAFIGKPGQ							0.001	0.0026065		0.001	0.001		0.001	0.001		0.001	0.00279459
294	0.00119208	1	VDNKFNKEVCDAYAQIGNLPNLNVYQIVAFIFSLGD			294	0.000833931	1	VDNKFSKEWSNASDQICVLPNLNVRQRDAFIGSLGN			294	0.00199948	1	VDNKFSKEVVDATIKIHYLPNLNRDQKCAFIFSLFD			294	0.00194769	1	VDNKFNKEWSYAASEIHDLHLNEYQRLAFIFSLRD							0.001	0.0026065		0.00266786	0.001		0.00499896	0.001		0.001	0.00458918
295	0.00119208	1	VDNKFNKEVCDAYAQIGNLPNLNVYQIVAFIFSLFD			295	0.000833931	1	VDNKFSKEWIYAFCEINCLPNLNHGQVDAFLSSLYN			295	0.00199948	1	VDNKFSKEVVDATIENHYLPNLNRDQKCAFIFSLFD			295	0.00194769	1	VDNKFNKEWSYAVSQICGLPNLNGFQGGAFVHSLTN							0.00219208	0.001		0.00266786	0.001		0.42489	1.80585		0.00294768	0.001
296	0.00119208	1	VDNKFNKEVCDAYAQIGNLPNLNVYQIVAFIFSLIN			296	0.000833931	1	VDNKFSKEWDDAVRQICTLPNLNRSQRPAFLGSLVD			296	0.00199948	1	VDNKFSKEVVDATIEIHYLPNLNRDQKCAFIFSLFD			296	0.00194769	1	VDNKFNKEWSYAVSQILNLPNLNRFQECAFLCSLRD							0.00219208	0.001		0.001	0.001		0.001	0.00486892		0.001	0.001
297	0.00119208	1	VDNKFNKEVCDAYAQIGNLPNLNVYQIVAFLSSLSN			297	0.000833931	1	VDNKFSKEWDDAVAEIGCLPNLNLCQGNAFVYSLVD			297	0.00199948	1	VDNKFSKEVVDATIEIHYLPNLNRDQKCAFIFSLFD			297	0.00194769	1	VDNKFNKEWSYASIQICSLPNLNDIQGDAFIVSLSN							0.001	0.0026065		0.001	0.001		0.001	0.001		0.00489537	0.00638377
298	0.00119208	1	VDNKFNKEVCDAYAQIGNLPNLNVYQIVAFLPSLSD			298	0.000833931	1	VDNKFSKEWGYAAFEILNLPNLNRGQEGAFISSLTD			298	0.00199948	1	VDNKFSKEVVDATIEITDLPNLNDAQRIAFIFSLFD			298	0.00194769	1	VDNKFNKEWSYASRQILVLPNLNGIQISAFVSSLND							0.001	0.00421301		0.00266786	0.001		0.001	0.001		0.001	0.001
299	0.00119208	1	VDNKFNKEVCDAYAQIGNLPNLNVYQIVAFLRSLIN			299	0.000833931	1	VDNKFSKEWVNASRQICSLPNLNEGQVRAFVPSLHN			299	0.00199948	1	VDNKFSKEVVDATIEITDLPNLNDVQVFAFIYSLFD			299	0.00194769	1	VDNKFNKEWSYAFDEIDILPNLNASQINAFLNSLRD							0.00219208	0.001		0.001	0.001		0.00299948	0.001		0.001	0.00279459
300	0.00119208	1	VDNKFNKEVCDAYAQIGNLPNLNVYQIVAFLVSLRN			300	0.000833931	1	VDNKFSKEWYTASVEICGLPNLNGYQGAAFIHSLSD			300	0.00199948	1	VDNKFSKEVVDATIEIQYLPNLNDAQRIAFIFSLFD			300	0.00194769	1	VDNKFNKEWSSAVVEICSLPNLNGGQGGAFLPSLDD							0.001	0.0026065		0.001	0.001		0.001	0.0203446		0.001	0.001
301	0.00119208	1	VDNKFNKEVCDAYAQIGNLPNLNVYQIVAFLYSLSD			301	0.000833931	1	VDNKFSKEWSDAIHEITSLPNLNRCQGSAFLISLAD			301	0.00199948	1	VDNKFSKEVVDATIEIHNLPNLNRDQKCAFIFSLFD			301	0.00194769	1	VDNKFNKEWSSASDEILSLPNLNGYQMDAFVFSLTN							0.001	0.0026065		0.001	0.001		0.001	0.001		0.00294768	0.001
302	0.00119208	1	VDNKFNKEVCDAYAQIGNLPNLNVYQIVAFLCSLND			302	0.000833931	1	VDNKFSKEWCSAVCQILSLPNLNGIQGSAFVSSLCD			302	0.00199948	1	VDNKFSKEVVDATIEIHYMPNLNEPQVCAFIFSLFD			302	0.00194769	1	VDNKFNKEWSSAAVEICRLPNLNGTQGGAFVGSLSN							0.001	0.0026065		0.001	0.001		0.001	0.00293446		0.001	0.001
303	0.00119208	1	VDNKFNKEVCDAYAQIGNLPNLNVYQIVAFLFSLCD			303	0.000833931	1	VDNKFSKELYSAVCEIHFLPNLNPSQRLAFIFSLFD			303	0.00199948	1	VDNKFSKEVVDATIEIHYQPNLNRDQKCAFIFSLFD			303	0.00194769	1	VDNKFNKEWSSAVIEICSLPNLNRGPGVRLRSQPAQ							0.001	0.00421301		0.00433572	0.011406		0.001	0.00293446		0.001	0.001
304	0.00119208	1	VDNKFNKEVCDAYAQIGNLPNLNVYQIVAFLSSLFN			304	0.00166786	2	VDNKSTKEVPNASDQIFLLPNLNDYQVLAFLHSLRD			304	0.00199948	1	VDNKFSKEVVDATIEIHYLPNLNRDQKCAFIFSLFD			304	0.00194769	1	VDNKFNKEWSSASSQICSLPNLNLRQEHAFVFSLSN							0.00219208	0.001		0.0477001	0.0675987		0.001	0.00293446		0.00294768	0.001
305	0.00119208	1	VDNKFNKEVCDAYAQIGNLPNLNVYQIVAFLISLGD			305	0.00166786	2	VDNKFNKEVPNASDQIFLLPNLNDYQVLAFINSLRN			305	0.00199948	1	VDNKFSKEVVDATIEIHYLPNLNRDQKCAFIFSLFD			305	0.00194769	1	VDNKFNKEWSNAVYQITVLPNLNRSQGDAFLDSLPD							0.00219208	0.001		0.00266786	0.001		0.001	0.001		0.001	0.001
306	0.00119208	1	VDNKFNKEVCDAYAQIGNLPNLNVYQIVAFLPSLSN			306	0.00166786	2	VDNKFNKEVPNASDQIFLLPNLNDYQVLAFLHSLRD			306	0.00199948	1	VDNKFSKEVVDATIEIHYLQNLNDYQRVAFIFSLFD			306	0.00194769	1	VDNKFNKEWSNASDEILRLPNLNVCQEYAFVSSLVD							0.001	0.0026065		0.001	0.001		0.00699844	0.001		0.001	0.001
307	0.00119208	1	VDNKFNKEVCDAYAQIGNLPNLNVYQIVAFVHSLGD			307	0.00166786	2	VDNKFNKEWPYADYEICTLPNLNDYQVLAFLHSLRD			307	0.00199948	1	VDNKFSKEVVDATIEIHYLPKLNRDQKCAFIFSLFD			307	0.00194769	1	VDNKFNKEWSNAINQISALPNLNLDQENAFVDSLVD							0.00219208	0.001		0.00266786	0.001		0.00299948	0.001		0.001	0.001
308	0.00119208	1	VDNKFNKEVCDAYAQIGNLPNLNVYQIVAFVVSLDN			308	0.00166786	2	VDNKFNKEWFAATYQICRLPNLNHHQVSAFIVSLCD			308	0.00199948	1	VDNKFSKEVVDATIEIHYLPNLNRDQKCAFIFSLFD			308	0.00194769	1	VDNKFNKEWSNAISEIARLPNLNGCQEAAFVCSLCN							0.001	0.0026065		0.001	0.001		0.00299948	0.001		0.001	0.001
309	0.00119208	1	VDNKFNKEVCDAYAQIGNLPNLNVYQIVAFVHSLGD			309	0.00166786	2	VDNKFNKELHYAVHEIISLPNLNEDQVLAFLHSLRD			309	0.00199948	1	VDNKFSKEVVDATIEIHYLPN*NRDQKCAFIFSLFD			309	0.00194769	1	VDNKFNKEWSNAIFQICILPNLNVTQGGAFVPSLND							0.00219208	0.001		0.001	0.001		0.001	0.001		0.001	0.001
310	0.00119208	1	VDNKFNKEVCDAYAQIGNLPNLNVYQIVAFVRSLDN			310	0.00166786	2	VDNKFNKELFNAAFEIVSMPNLNLSQERAFIISLNN			310	0.00199948	1	VDNKFSKEVVDATIEIHYLPNLNSDQKCAFIFSLFD			310	0.00194769	1	VDNKFNKEWSNAVSEICGLPNLNASQGAAFVNSLGD							0.001	0.0026065		0.001	0.001		0.00299948	0.00680338		0.001	0.001
311	0.00119208	1	VDNKFNKEVCDAYAQIGNLPNLNVYQIVAFVASLSN			311	0.00166786	2	VDNKFNKELFNAAFEIVSLQNLNLSQERAFIISLNN			311	0.00199948	1	VDNKFSKEVVDATIEIHYLPNLNQTQVVAFVGSLAD			311	0.00194769	1	VDNKFNKEWSNAVDQIALLPNLNEGQEGAFLCSLIN							0.0069604	0.00581951		0.001	0.001		0.00299948	0.001		0.001	0.001
312	0.00119208	1	VDNKFNKEVCDAYAQIGNLPNLNVYQIVAFVFSLSN			312	0.00166786	2	VDNKFNKELFNAAFEIVSLPNLNLSQESAFIISLNN			312	0.00199948	1	VDNKFSKEVVDATIEIHYLPNLNQSQRIAFIFSLFD			312	0.00194769	1	VDNKFNKEWSNAVCQILHLPNLNGSQRPAFVSSLRN							0.00338416	0.0026065		0.00433572	0.00308121		0.001	0.00293446		0.001	0.00279459
313	0.00119208	1	VDNKFNKEVCDAYAQIGNLPNLNVYQIVAFVHSLAN			313	0.00166786	2	VDNKFNKELFNAAFEIVSLPNLNLSQELAFIISLNN			313	0.00199948	1	VDNKFSKEVVDATIEIHYLPNLNPDQKCAFIFSLFD			313	0.00194769	1	VDNKFNKEWSNAVCQICSLPNLNLVQRPAFVHSLDD							0.001	0.0026065		0.001	0.001		0.001	0.00293446		0.001	0.00279459
314	0.00119208	1	VDNKFNKEVCDAYAQIGNLPNLNVYQIVAFVHSLCN			314	0.00166786	2	VDNKFNKELFNAAFEIVSLPNLNLSQVLAFINSLRN			314	0.00199948	1	VDNKFSKEVVDATIEIHYLPNLNPSQRLAFIFSLFD			314	0.00194769	1	VDNKFNKEWSNAVSQIYFLPNLNHFQGGAFLGSLRD							0.001	0.0026065		0.001	0.001		0.001	0.001		0.001	0.001
315	0.00119208	1	VDNKFNKEVCDAYAQIGNLPNLNVYQIVAFVPSLTD			315	0.00166786	2	VDNKFNKELFNAAFEIVSLPNLNDYQVLAFINSLRN			315	0.00199948	1	VDNKFSKEVVDATIEIHYLPNLNPCQKVAFIFSLFD			315	0.00194769	1	VDNKFNKEWSNAVCQITRLPNLNVDQRGCLHRQPA*							0.00219208	0.001		0.00266786	0.001		0.001	0.001		0.001	0.001
316	0.00119208	1	VDNKFNKEVCDAYAQIGNLPNLNVYQIVAFVRSLDD			316	0.00166786	2	VDNKFNKELFNAAFEIVSLPNLNLSQERAFIISLNN			316	0.00199948	1	VDNKFSKEVVDATIEIHYLPNLNRNQKCAFIFSLFD			316	0.00194769	1	VDNKFNKEWSNAVCQILRLPNLNLSQEVAFIDSLVD							0.00219208	0.001		0.001	0.001		0.001	0.001		0.001	0.001
317	0.00119208	1	VDNKFNKEVCDAYAQIGNLPNLNVYQIVAFFRSLDN			317	0.00166786	2	VDNKFNKEGDYAVFQICGLPNLNEGQGAAFVGSLHN			317	0.00199948	1	VDNKFSKEVVDATIEIHYLPNLNRHQKCAFIFSLFD			317	0.00194769	1	VDNKFNKEWSNAVCQICLLPNLNDSQGSAFVVSLRD							0.00219208	0.001		0.001	0.001		0.001	0.00293446		0.001	0.001
318	0.00119208	1	VDNKFNKEVCDAYAQIGNLPNLNVYQIVALIRSLDN			318	0.00166786	2	VDNKFTKKVPNASDQIFLLPNLNDYQVLAFLHSLRD			318	0.00199948	1	VDNKFSKEVVDATIEIHYLPNLNREQKCAFIFSLFD			318	0.00194769	1	VDNKFNKEWSNAVCQICSLPNLNPCQRGAFVDSLDN							0.00219208	0.0026065		0.001	0.001		0.001	0.001		0.001	0.001
319	0.00119208	1	VDNKFNKEVCDAYAQIGNLPNLNVYQIVAFIRSLDN			319	0.00166786	2	VDNKFTKEMPNASDQIFLLPNLNDYQVLAFLHSLRD			319	0.00199948	1	VDNKFSKEVVDATIEIHYLPNLNRDQKCAFIFSLFD			319	0.00194769	1	VDNKFNKEWSNAVCQICSLPNLNDFQVPAFISSLVD							0.00219208	0.001		0.001	0.00516242		0.001	0.001		0.001	0.00279459
320	0.00119208	1	VDNKFNKEVCDAYAQIGNLPNLNVYQIVVFIRSLDN			320	0.00166786	2	VDNKFTKEVPNASDQIFLLPNLNDYQVLAFLHSLRD			320	0.00199948	1	VDNKFSKEVVDATIEIHYLPNLNREQGGAFIVSLFD			320	0.00194769	1	VDNKFNKEWSNAVCQICSLPNLNASQEFAFLDSLAD							0.00338416	0.001		0.00433572	0.00308121		0.001	0.00293446		0.001	0.00638377
321	0.00119208	1	VDNKFNKEVCDAYAQIGNLPNLNVYQIVAFIRSLDN			321	0.00166786	2	VDNKFTKEVPNESDQIFLLPNLNDYQVLAFLHSLRD			321	0.00199948	1	VDNKFSKEVVDATIEIHYLPNLNRDQKCAFIFSLFD			321	0.00194769	1	VDNKFNKEWSNAVCQICSLPNLNAFQQVAFVSSLGD							0.001	0.0026065		0.00600359	0.00516242		0.001	0.001		0.001	0.00279459
322	0.00119208	1	VDNKFNKEVCDAYAQIGNLPNLNVYQMFAFIRSLDN			322	0.00166786	2	VDNKFTKEVPNASDQIFLLPNLNDYQVLAFLHSLRD			322	0.00199948	1	VDNKFSKEVVDATIEIHYLPNLNRDHKCAFIFSLFD			322	0.00194769	1	VDNKFNKEWSNAVCQICSLPNLNGYQGPAFIDSLGD							0.001	0.0026065		0.00433572	0.00932484		0.001	0.001		0.001	0.001
323	0.00119208	1	VDNKFNKEVCDAYAQIGNLPNLNVYQMFAFVDSLSG			323	0.00166786	2	VDNKFTKEVPNASDQIFLPPNLNDYQVLAFLHSLRD			323	0.00199948	1	VDNKFSKEVVDATIEIHYLPNLNRDQK*AFIFSLFD			323	0.00194769	1	VDNKFNKEWSNAVCQICSLPNLNGGQGDAFVGSLHD							0.001	0.0026065		0.001	0.001		0.001	0.001		0.00489537	0.001
324	0.00119208	1	VDNKFNKEVCDAYAQIGNLPNLNVYQMFAFVDSLDN			324	0.00166786	2	VDNKFTKEVPNASDQIFLLTNLNDYQVLAFLHSLRD			324	0.00199948	1	VDNKFSKEVVDATIEIHYLPNLNRDQKCAFVVSLCD			324	0.00194769	1	VDNKFNKEWSNAVCQICSLPNLNVTQECAFICSLPD							0.00457624	0.001		0.001	0.00308121		0.001	0.001		0.001	0.001
325	0.00119208	1	VDNKFNKEVCDAYAQIGNLPNLNVYQEGAFVCSLDN			325	0.00166786	2	VDNKFTKEVPNASDQIFLLPNSNDYQVLAFLHSLRD			325	0.00199948	1	VDNKFSKEVVDATIEIHYLPNLNRDQKCAR			325	0.00194769	1	VDNKFNKEWSNASCEICRLPNLNVCQRNAFVDSLYD							0.001	0.0026065		0.001	0.001		0.001	0.00486892		0.001	0.001
326	0.00119208	1	VDNKFNKEVCDAYAQIGNLPNLNVYQVDAFLGSLCN			326	0.00166786	2	VDNKFTKEVPNASDQIFLLPNLNISQERAFIISLNN			326	0.00199948	1	VDNKFSKEVVDATIEIHYLPNLNRDQKCAYIFSLFD			326	0.00194769	1	VDNKFNKEWSNASNQIFDLPNLNVLQMSAFVSSLRN							0.001	0.0026065		0.001	0.00308121		0.001	0.00293446		0.001	0.001
327	0.00119208	1	VDNKFNKEVCDAYAQIGNLPNLNVYQVYAFLLSLGD			327	0.00166786	2	VDNKFTKEVPNASDQIFLLPNLNLSQVLAFLHSLRD			327	0.00199948	1	VDNKFSKEVVDATIEIHYLPNLNRDQKCAFIYSLFD			327	0.00194769	1	VDNKFNKEWSTATSEICTLPNLNGHQLSAFVFSLGN							0.001	0.0026065		0.00266786	0.001		0.00499896	0.001		0.001	0.001
328	0.00119208	1	VDNKFNKEVCDAYAQIGNLPNLNVYQVCAFICSLLN			328	0.00166786	2	VDNKFTKEVPNASDQIFLLPNLNDHQVLAFLHSLRD			328	0.00199948	1	VDNKFSKEVVDATIEIHYLPNLNRDQKCAFIVSLSD			328	0.00194769	1	VDNKFNKEWSTAIYEICRLPNLNGGQGNAFIYSLDD							0.00219208	0.001		0.00600359	0.00932484		0.001	0.00486892		0.001	0.001
329	0.00119208	1	VDNKFNKEVCDAYAQIGNLPNLNVSQVFAFVISLVN			329	0.00166786	2	VDNKFTKEVPNASDQIFLLPNLNDYQIVAFIRSLDN			329	0.00199948	1	VDNKFSKEVVDATIEIHYLPNLNRDQKCAFIYSLFD			329	0.00194769	1	VDNKFNKEWSTAIYEICRLPNLNGGQGNAFIVSLRD							0.001	0.0026065		0.001	0.001		0.001	0.001		0.001	0.001
330	0.00119208	1	VDNKFNKEVCDAYAQIGNLPNLNVFQLCAFIVSLGD			330	0.00166786	2	VDNKFTKEVPNASDQIFLLPNLNDYQMLAFLHSLRD			330	0.00199948	1	VDNKFSKEVVDATIEIHYLPNLNRDQKCAFISSLFD			330	0.00194769	1	VDNKFNKEWSTAVAQIAGLAELKRGPADRLRRQPEQ							0.00338416	0.001		0.001	0.00308121		0.001	0.001		0.001	0.001
331	0.00119208	1	VDNKFNKEVCDAYAQIGNLPNLNVNQLFAFVPSLAD			331	0.00166786	2	VDNKFTKEVPNASDQIFLLPNLNDYQERAFIISLNN			331	0.00199948	1	VDNKFSKEVVDATIEIHYLPNLNRDQKCAFISSLFD			331	0.00194769	1	VDNKFNKEWSTAVGQILSLPNLNGRQGCAFIYSLGD							0.00457624	0.0026065		0.001	0.00308121		0.001	0.001		0.001	0.001
332	0.00119208	1	VDNKFNKEVCDAYAQIGNLPNLNVTQMIAFIRSLDN			332	0.00166786	2	VDNKFTKEVPNASDQIFLLPNLNDYQALAFLHSLRD			332	0.00199948	1	VDNKFSKEVVDATIEIHYLPNLNRDQKCAFICSLPN			332	0.00194769	1	VDNKFNKEWSTAVVQILLLPNLNDGQGNAFIRSLAN							0.00219208	0.00581951		0.001	0.00516242		0.001	0.001		0.001	0.00638377
333	0.00119208	1	VDNKFNKEVCDAYAQIGNLPNLNVIQEGAFVSSLCN			333	0.00166786	2	VDNKFTKEVPNASDQIFLLPNLNDYQVIAFLHSLRD			333	0.00199948	1	VDNKFSKEVVDATIEIHYLPNLNRDQKCAFICSLFD			333	0.00194769	1	VDNKFNKEWSTAVIQICCLPNLNLNQGGAFVCSLGD							0.001	0.0026065		0.0110072	0.00308121		0.001	0.00293446		0.001	0.001
334	0.00119208	1	VDNKFNKEVCDAYAQIGNLPNLNVPQEPAFIHSLVN			334	0.00166786	2	VDNKFTKEVPNASDQIFLLPNLNDYQVLAFVISLNN			334	0.00199948	1	VDNKFSKEVVDATIEIHYLPNLNRDQKCAFIFNLFD			334	0.00194769	1	VDNKFNKEWSTAVREILGLPNLNELQGNAFVFSLVD							0.00219208	0.001		0.001	0.001		0.00299948	0.00486892		0.001	0.001
335	0.00119208	1	VDNKFNKEVCDAYAQIGNLPNLNVRQITAFIRSLDN			335	0.00166786	2	VDNKFTKEVPNASDQIFLLPNLNDYQVLPSYTACVT			335	0.00199948	1	VDNKFSKEVVDATIEIHYLPNLNRDQKCAFIFNLFD			335	0.00194769	1	VDNKFNKEWSTASHQIASLPNLNHPQMHAFVSSLGD							0.001	0.0026065		0.0360251	0.0363805		0.00299948	0.001		0.00294768	0.001
336	0.00119208	1	VDNKFNKEVCDAYAQIGNLPNLNVRQITAFVRSLHN			336	0.00166786	2	VDNKFTKEVPNASDQIFLLPNLNDYQVLAYLHSLRD			336	0.00199948	1	VDNKFSKEVVDATIEIHYLPNLNRDQKCAFIFTLFD			336	0.00194769	1	VDNKFNKEWSDAIFEICSLPNLNGSQGGAFLGSLRD							0.00219208	0.0026065		0.00266786	0.00308121		0.001	0.001		0.001	0.001
337	0.00119208	1	VDNKFNKEVCDAYAQIGNLPNLNVRQITAFVRSLDN			337	0.00166786	2	VDNKFTKEVPNASDQIFLLPNLNDYQVLAFLHSLID			337	0.00199948	1	VDNKFSKEVVDATIEIHYLPNLNRDQKCAFIFSQFD			337	0.00194769	1	VDNKFNKEWSDAIIQICGLPNLNDDQGAAFLVSLAD							0.001	0.0026065		0.001	0.00724363		0.001	0.00293446		0.00489537	0.001
338	0.00119208	1	VDNKFNKEVCDAYAQIGNLPNLNVRQITAFVRSLSD			338	0.00166786	2	VDNKFTKEVPNASDQIFLLPNLNDYQVLAFLHSLGN			338	0.00199948	1	VDNKFSKEVVDATIEIHYLPNLNRDQKCAFIFSPFD			338	0.00194769	1	VDNKFNKEWSDAAAQILLLPNLNQHQGIAFIPSLRD							0.00219208	0.001		0.00266786	0.001		0.001	0.001		0.00294768	0.001
339	0.00119208	1	VDNKFNKEVCDAYAQIGNLPNLNVRQITAFVRSLCD			339	0.00166786	2	VDNKFTKEVPNASDQIFLLPNLNDYQVLAFLHSLRD			339	0.00199948	1	VDNKFSKEVVDATIEIHYLPNLNRDQKCAFIFSLND			339	0.00194769	1	VDNKFNKEWSDAAYEICRLPNLNRPQVGAFIGSLGD							0.001	0.0026065		0.00433572	0.0134873		0.001	0.001		0.001	0.00279459
340	0.00119208	1	VDNKFNKEVCDAYAQIGNLPNLNVLQRFAFIDSLDN			340	0.00166786	2	VDNKFTKEVPNASDQIFLLPNLNDYQVLAFLHGLRD			340	0.00199948	1	VDNKFSKEVVDATIEIHYLPNLNRDQKCAFIFSLID			340	0.00194769	1	VDNKFNKEWSDAVNEILGLPNLNPLQEGAFVGSLNN							0.001	0.0026065		0.001	0.00308121		0.001	0.001		0.001	0.001
341	0.00119208	1	VDNKFNKEVCDAYAQIGNLPNLNVLQLSAFLSKPA*			341	0.00166786	2	VDNKFTKEVPNASDQIFLLPNLNDYQVLAFLRSLRD			341	0.00199948	1	VDNKFSKEVVDATIEIHYLPNLNRDQKCAFIFSLDN			341	0.00194769	1	VDNKFNKEWSDAVHQICCLPNLNVGQVDAFIPSLDN							0.001	0.0026065		0.001	0.001		0.750805	0.0687061		0.001	0.001
342	0.00119208	1	VDNKFNKEVCDAYAQIGNLPNLNVDQILTFIRSLDN			342	0.00166786	2	VDNKFTKEVPNASDQIFLLPNLNDYQVLAFLHSLRD			342	0.00199948	1	VDNKFSKEVVDATIEIHYLPNLNRDQKCAFIFSLAN			342	0.00194769	1	VDNKFNKEWSDASRQICNLPNLNEVQGNAFVISLNN							0.001	0.0026065		0.0243501	0.0218121		0.001	0.00293446		0.00294768	0.001
343	0.00119208	1	VDNKFNKEVCDAYAQIGNLPNLNVDQILAFIRSLRD			343	0.00166786	2	VDNKFTKEVPNASDQIFLLPNLNDYLVLAFLHSLRD			343	0.00199948	1	VDNKFSKEVVDATIEIHYLPNLNRDQKCAFIFSLGD			343	0.00194769	1	VDNKFNKEWSDATSEICRLPNLNGCQVGAFVHSLAN							0.00219208	0.001		0.001	0.00308121		0.001	0.001		0.00294768	0.001
344	0.00119208	1	VDNKFNKEVCDAYAQIGNLPNLNVDQILAFVLSLAD			344	0.00166786	2	VDNKFTKEVPNASDQIFLLPNLNGYQVLAFLHSLRD			344	0.00199948	1	VDNKFSKEVVDATIEIHYLPNLNRDQKCAFIFSLVN			344	0.00194769	1	VDNKFNKEWSDAISQILSLPNLNHCQESAFVLSLFD							0.00219208	0.001		0.001	0.001		0.001	0.001		0.001	0.00279459
345	0.00119208	1	VDNKFNKEVCDAYAQIGNLPNLNVDQILALVLSLHN			345	0.00166786	2	VDNKFTKEVPNASDQIFLLPNLNVRQGDAFIFSLID			345	0.00199948	1	VDNKFSKEVVDATIEIHYLPNLNRDQKCAFIFSLYD			345	0.00194769	1	VDNKFNKEWSDAATEICSLPNLNDVQGDAFLGSLPD							0.00219208	0.001		0.00266786	0.001		0.00299948	0.001		0.001	0.00458918
346	0.00119208	1	VDNKFNKEVCDAYAQIGNLPNLNVGQILAFVLSLDN			346	0.00166786	2	VDNKFTKEVPNASDQIFLLPNLTDYQVLAFLHSLRD			346	0.00199948	1	VDNKFSKEVVDATIEIHYLPNLNRDQKCAFIFSLYD			346	0.00194769	1	VDNKFNKEWSDAAYQICCLPNLNGAQEDAFITSLVD							0.00219208	0.001		0.001	0.00308121		0.001	0.00293446		0.001	0.001
347	0.00119208	1	VDNKFNKEVCDAYAQIGNLPNLNVGQEHAFIGSLYD			347	0.00166786	2	VDNKFTKEVPNASDQIFLLPNLSDYQVLAFLHSLRD			347	0.00199948	1	VDNKFSKEVVDATIEIHYLPNLNRDQKCAFIFSLCN			347	0.00194769	1	VDNKFNKEWSDAAYQICCLPNLNGAQEDAFITSLFD							0.001	0.0026065		0.001	0.00308121		0.001	0.001		0.001	0.001
348	0.00119208	1	VDNKFNKEVCDAYAQIGNLPNLNVVQLCAFLGNLHD			348	0.00166786	2	VDNKFTKEVPNASDQIFLLPNLNDYQVLAFLHSLRD			348	0.00199948	1	VDNKFSKEVVDATIEIHYLPNLNRDQKCAFIFSLFE			348	0.00194769	1	VDNKFNKEWSDAVREICHLPNLNLRQEAAFICSLHD							0.00338416	0.00421301		0.001	0.001		0.001	0.001		0.001	0.001
349	0.00119208	1	VDNKFNKEVCDAYAQIGNLPNLNVYQRYAFVNSLGN			349	0.00166786	2	VDNKFTKEVPNVSDQIFLLPNLNDYQVLAFLHSLRD			349	0.00199948	1	VDNKFSKEVVDATIEIHYLPNLNRDQKCAFIFSLFG			349	0.00194769	1	VDNKFNKEWSDASRQICGLPNLNRSQGIAFLRSLDN							0.00219208	0.001		0.001	0.00308121		0.001	0.001		0.001	0.001
350	0.00119208	1	VDNKFNKEVCDAYAQIGNLPNLNVYQIIAFVRSLSD			350	0.00166786	2	VDNKFTKEVRNASDQIFLLPNLNDYQVLAFLHSLRD			350	0.00199948	1	VDNKFSKEVVDATIEIHYLPNLNRDQKCAFIFSLFN			350	0.00194769	1	VDNKFNKEWSDASIQILDLPNLNHDQRPAFVDSLCN							0.00219208	0.001		0.001	0.001		0.001	0.00293446		0.001	0.001
351	0.00119208	1	VDNKFNKEVCDAYAQIGNLPNLNVYQMFAFVDSLHN			351	0.00166786	2	VDNKFTKELPNASDQIFLLPNLNDYQVLAFLHSLRD			351	0.00199948	1	VDNKFSKEVVDATIEIHYLPNLNRDQKCAFIFSLFE			351	0.00194769	1	VDNKFNKEWSAATAEIIHLPNLNDSQGYAFVGSLGD							0.00219208	0.00421301		0.001	0.00308121		0.001	0.001		0.00294768	0.001
352	0.00119208	1	VDNKFNKEVCDAYAQIGNLPNLNVYQMFAFVDSLDN			352	0.00166786	2	VDNKFTKELCSAADEIFVLPNLNDYQVLAFLHSLRD			352	0.00199948	1	VDNKFSKEVVDATIEIHYLPNLNRDQKCAFIFSLFD			352	0.00194769	1	VDNKFNKEWSAATSEIISLPNLNDVQGPAFVCSLFN							0.001	0.0026065		0.001	0.001		0.00899792	0.0396892		0.001	0.001
353	0.00119208	1	VDNKFNKEVCDAYAQIGNLPNLNVYQMFAFVFSLDN			353	0.00166786	2	VDNKFTKEVPNASDQIFLLPNLNDYQVLAFLHSLRD			353	0.00199948	1	VDNKFSKEVVDATIEIHYLPNLNRDQKCAFIFSLFD			353	0.00194769	1	VDNKFNKEWSAAIYEIVNLPNLNQCQGSAFIRSLDD							0.001	0.0026065		0.00600359	0.00516242		0.0249938	0.00293446		0.00294768	0.00458918
354	0.00119208	1	VDNKFNKEVCDAYAQIGNLPNLNVYQEDAFIVSLDN			354	0.00166786	2	VDNKFTKVVPNASDQIFLLPNLNDYQVLAFLHSLRD			354	0.00199948	1	VDNKFSKEVVDATIEIHYLPNLNRDQKCAFIFCLFD			354	0.00194769	1	VDNKFNKEWSAATRQICSLPNLNQFQENAFIYSLDD							0.00219208	0.0026065		0.001	0.001		0.001	0.00486892		0.001	0.001
355	0.00119208	1	VDNKFNKEVCDAYAQIGNLPNLNVSQISAFIFSLTN			355	0.00166786	2	VDNKFTKEGNDAADEIFILPNLNVTQVYAFLSSLRN			355	0.00199948	1	VDNKFSKEVVDATIEIHYLPNLNRDQKCAFIISLYD			355	0.00194769	1	VDNKFNKEWSAAIVEICALPNLNRIQGTAFVNSLDD							0.001	0.00421301		0.001	0.00308121		0.001	0.001		0.001	0.001
356	0.00119208	1	VDNKFNKEVCDAYAQIGNLPNLNVCQIDAFLCSLDD			356	0.00166786	2	VDNKFYKELPNASDQIFLLPNLNDYQVLAFLHSLRD			356	0.00199948	1	VDNKFSKEVVDATIEIHYLPNLNRDQKCAFILSLVN			356	0.00194769	1	VDNKFNKEWSAAIVEICALPNLNGDQGFAFLDSLCD							0.00219208	0.001		0.001	0.00308121		0.001	0.001		0.00294768	0.00279459
357	0.00119208	1	VDNKFNKEVCDAYAQIGNLPNLNVFQRNAFVCSLAN			357	0.00166786	2	VDNKFYKELCSAADQIFLLPNLNDYQVLAFLHSLRD			357	0.00199948	1	VDNKFSKEVVDATIEIHYLPNLNRDQKCAFIFSLFD			357	0.00194769	1	VDNKFNKEWSAAIYEITRLPNLNDNQEIAFLSSLGD							0.001	0.0026065		0.0143429	0.0176497		0.001	0.001		0.001	0.001
358	0.00119208	1	VDNKFNKEVCDAYAQIGNLPNLTVYQIVAFIRSLDN			358	0.00166786	2	VDNKFYKELCSAADEIFVLPNLNDDQVLDFINSLRN			358	0.00199948	1	VDNKFSKEVVDATIEIHYLPNLNRDQKCAFIFSLFD			358	0.00194769	1	VDNKFNKEWSAAVDQIYFLPNLNGLQGCAFVSSLGD							0.00219208	0.001		0.001	0.001		0.0129969	0.001		0.001	0.001
359	0.00119208	1	VDNKFNKEVCDAYAQIGNLPNLIVYQIVAFIRSLDN			359	0.00166786	2	VDNKFYKELCSAADEIFVLPNLNDDQVLAFINSLNN			359	0.00199948	1	VDNKFSKEVVDATIEIHYLPNLNRDQKCAFVCSLFD			359	0.00194769	1	VDNKFNKEWSAAVIEIGSLPNLNLSQQCAFVSSLPN							0.001	0.0026065		0.001	0.001		0.001	0.001		0.001	0.001
360	0.00119208	1	VDNKFNKEVCDAYAQIGNLPNLINGTPRVPGDCLPIQPV*			360	0.00166786	2	VDNKFYKELCSAADEIFVLPNLNDDQVLAFINSLRN			360	0.00199948	1	VDNKFSKEVVDATIEIHYLPNLNRDQKCAFVISLFD			360	0.00194769	1	VDNKFNKEWSAAVLQITGLPNLNVCQGVAFIGSLGD							0.001	0.00421301		0.001	0.001		0.001	0.001		0.00294768	0.001
361	0.00119208	1	VDNKFNKEVCDAYAQIGNLPNLYVYQIVAFIRSLDN			361	0.00166786	2	VDNKFYKELCSAADEIFVLPNLNDGQVLAFINSLRN			361	0.00199948	1	VDNKFSKEVVDATIEIHYLPNLNRDQKCAFVVSLFD			361	0.00194769	1	VDNKFNKEWSAAVGEILSLPNLNGNQGGAFIDSLGD							0.00219208	0.001		0.204479	0.134197		0.001	0.001		0.001	0.001
362	0.00119208	1	VDNKFNKEVCDAYAQIGNLPNFNVYQIVAFIRSLDN			362	0.00166786	2	VDNKFYKELCSAADEIFVLPNLNDYQVLTFLHSLRD			362	0.00199948	1	VDNKFSKEVVDATIEIHYLPNLNRDQKCAFVYSLVD			362	0.00194769	1	VDNKFNKEWSAASSEILDLPNLNESQVLAFIPSLGD							0.00219208	0.0026065		0.001	0.001		0.001	0.00293446		0.001	0.001
363	0.00119208	1	VDNKFNKEVCDAYAQIGNLPNFNVYQIVAFIRSLDN			363	0.00166786	2	VDNKFYKELFNAAFEIVSLPNLNLSQERAFLHSLRD			363	0.00199948	1	VDNKFSKEVVDATIEIHYLPNLNRDQKCAFVFSLFD			363	0.00194769	1	VDNKFNKEWSYAALQIAHLPNLNVSQEVAFVDSLVD							0.001	0.0026065		0.001	0.001		0.001	0.001		0.001	0.001
364	0.00119208	1	VDNKFNKEVCDAYAQIGNLPNLNVYQIVAFIRSLDN			364	0.00166786	2	VDNKFYKELFNAAFEIVSLPNLNDYQVLAFLHSLRD			364	0.00199948	1	VDNKFSKEVVDATIEIHYLPNLNRDQKCAFIFSLFD			364	0.00194769	1	VDNKFNKEWSYAASEILRLPNLNQVQKGAFVVSLPD							0.00338416	0.0026065		0.001	0.001		0.001	0.001		0.001	0.001
365	0.00119208	1	VDNKFNKEVCDAYAQIGNLPNLNVYQIVAFIRSLDN			365	0.00166786	2	VDNKFYK*LCSAADEIFVLPNLNDDQVLAFINSLRN			365	0.00199948	1	VDNKFSKEVVDATIEIHYLPNLNRDQKIAFIFSLFD			365	0.00194769	1	VDNKFNKEWSYAVREIISLPNLNDCQLNAFIDSLSN							0.00219208	0.001		0.0210143	0.0280557		0.001	0.001		0.001	0.00279459
366	0.00119208	1	VDNKFNKEVCDAYAQIGNLPILNVYQIVAFIRSLDN			366	0.00166786	2	VDNKFYKEWGYASNQIYVLPNLNLVQIRAFISSLCD			366	0.00199948	1	VDNKFSKEVVDATIEIHYLPNLNRDQKCLHLQPVR			366	0.00194769	1	VDNKFNKEWSYAVVEIYSLAELKRQSDSRLPQQPG*							0.00219208	0.001		0.001	0.001		0.001	0.001		0.001	0.00279459
367	0.00119208	1	VDNKFNKEVCDAYAQIGNLPNLNVYQIVAFVDSLSG			367	0.00166786	2	VDNKFYKELNDAAYQIATLPNLNEVQERAFVNSLRD			367	0.00199948	1	VDNKFSKEVVDATIEIHYLPNLNRDQKCAFIFSLFN			367	0.00194769	1	VDNKFNKEWSYATSQILVLPNLNRGQELAFVGSLGN							0.0069604	0.001		0.012675	0.00932484		0.001	0.00486892		0.001	0.001
368	0.00119208	1	VDNKFNKEVCDAYAQIGTLPNLNHYQVAAFICSLID			368	0.00166786	2	VDNKFYKELCYAYVQICGLPNLNQNQKYAFVSSLRD			368	0.00199948	1	VDNKFSKEVVDATIEIHYLPNLNRDQKCAFIFSLFD			368	0.00194769	1	VDNKFNKEWSYATAQILHLPNLNEAQLPAFVDSLHN							0.001	0.0026065		0.0243501	0.0259745		0.00499896	0.0164757		0.00294768	0.001
369	0.00119208	1	VDNKFNKEVCDAYAQIGILPNLNVYQIVAFIRSLDN			369	0.00166786	2	VDNKFSKELTNAVREIAGLPNLNVSQKTAFVGSLRD			369	0.00199948	1	VDNKFSKEVVDATIEIHYLPNLNRDQNVPSSLACSM			369	0.00194769	1	VDNKFNKEWSYATAQICVLPNLNVVQQSAFLSSLTD							0.001	0.0026065		0.001	0.00308121		0.001	0.001		0.00294768	0.001
370	0.00119208	1	VDNKFNKEVCDAYAQIGHLPNLNAAQGSAFIYSLNN			370	0.00250179	3	VDNKLTKEVPNASDQIFLLPNLNDYQVLAFLHSLRD			370	0.00199948	1	VDNKFSKEVVDATIEIHYLPNLNRDQRHAFIFSLFD			370	0.00194769	1	VDNKFNKEWSYAIVQIINLPNLNADQGDAFLSSLGN							0.00934456	0.00581951		0.001	0.001		0.001	0.001		0.001	0.001
371	0.00119208	1	VDNKFNKEVCDAYAQIGDLPNLNAFQEFAFIRSLDN			371	0.00250179	3	VDNKFNKEVPNASDQIFLLPNLNLSQERAFIISLNN			371	0.00199948	1	VDNKFSKEVVDATIEIHYLPNLNRDQRHAFIFSLFD			371	0.00194769	1	VDNKFNKEWSYADHEIHLLPNLNGAQRRAFICSLYD							0.00219208	0.001		0.001	0.001		0.00299948	0.001		0.001	0.001
372	0.00119208	1	VDNKFNKEVCDAYAQIVICRT*TSIRQSPSFAAWTM			372	0.00250179	3	VDNKFNKEVPNASDQIFLLPNLNDDQVLAFINSLRN			372	0.00199948	1	VDNKFSKEVVDATIEIHYLPNLNRDQRVAFIFSLFD			372	0.00194769	1	VDNKFNKEWSYAASQILRLPNLNPSQEGAFVCSLIN							0.00338416	0.0026065		0.001	0.001		0.00299948	0.001		0.001	0.001
373	0.00119208	1	VDNKFNKEVCDAYAQIVVLPNLNRCQQSAFIRSLDN			373	0.00250179	3	VDNKFNKEVPNASDQIFLLPNLNDYQVLAFINSLRN			373	0.00199948	1	VDNKFSKEVVDATIEIHYLPNLNRDQRIAFIFSLFD			373	0.00194769	1	VDNKFNKEWSYAALEIANLPNLNRVQRRAFVGSLVD							0.001	0.0026065		0.001	0.001		0.001	0.001		0.00294768	0.001
374	0.00119208	1	VDNKFNKEVCDAYAQIVHLPNLNACQRTAFICSLSN			374	0.00250179	3	VDNKFNKEVPNASDQIFLLPNLNDYQVLAFLHSLRN			374	0.00199948	1	VDNKFSKEVVDATIEIHYLPNLNRDQRIAFIFSLFD			374	0.00194769	1	VDNKFNKEWSYAVPQICSLPNLNDIQELAFVTSLSD							0.00934456	0.00903252		0.001	0.001		0.001	0.00873784		0.001	0.00279459
375	0.00119208	1	VDNKFNKEVCDAYAQICNLPNLNLSQQRAFVSSLCN			375	0.00250179	3	VDNKFNKELFNAAFEIVSLPNLNLSQERAFIISMNN			375	0.00199948	1	VDNKFSKEVVDATIEIHYLPNLNRDQISAFLYSLSD			375	0.00194769	1	VDNKFNKEWSYAVRQICNLPNLNRPQGPAFVDSLSN							0.001	0.0026065		0.00266786	0.001		0.00299948	0.001		0.001	0.001
376	0.00119208	1	VDNKFNKEVCDAYAQICNLPNLNGGQVYAFVLSLDN			376	0.00250179	3	VDNKFNKELFNAAFEIVSLPNLNLSQERAFIISLNN			376	0.00199948	1	VDNKFSKEVVDATIEIHYLPNLNRDQIVAFIFSLFD			376	0.00194769	1	VDNKFNKEWSYAVVQICALPNLNGSQLIAFVPSLLD							0.001	0.0026065		0.00266786	0.001		0.001	0.00293446		0.001	0.00997296
377	0.00119208	1	VDNKFNKEVCDAYAQICTLPNLNRLQKVAFLHSLGN			377	0.00250179	3	VDNKFNKELFNAAFEIVSLPNLNLSQERAFIISLRN			377	0.00199948	1	VDNKFSKEVVDATIEIHYLPNLNRDQICAFVISLFD			377	0.00194769	1	VDNKFNKEWSYASIQICNLPNLNVDQGAAFLGSLLD							0.00576832	0.001		0.00933931	0.00724363		0.001	0.001		0.00294768	0.00279459
378	0.00119208	1	VDNKFNKEVCDAYAQICHLPNLNAFQEFAFIFSLTN			378	0.00250179	3	VDNKFNKELFNAAFEIVSLPNLNLSQERAFIISLNN			378	0.00199948	1	VDNKFSKEVVDATIEIHYLPNLNRAQRIAFIFSLFD			378	0.00194769	1	VDNKFNKEWSYASRQIIGLPNLNLCQETAFVLSLPN							0.00219208	0.001		0.00266786	0.001		0.00299948	0.001		0.001	0.001
379	0.00119208	1	VDNKFNKEVCDAYAQIGNLPNLNVYQIVAFIRSLDN			379	0.00250179	3	VDNKFNKELFNAAFEIVSLPNLNLSQELAFVISLNN			379	0.00199948	1	VDNKFSKEVVDATIEIHYLPNLNRGQVSAFVCSLGD			379	0.00194769	1	VDNKFNKEWSYASDQILRLPNLNGGQLAAFIDSLGD							0.00219208	0.001		0.001	0.00308121		0.001	0.001		0.001	0.001
380	0.00119208	1	VDNKFNKEVCDAYVQIGNLPNLNVYQIVAFIRSLDN			380	0.00250179	3	VDNKFTKEVTNASDQIFLLPNLNDYQVLAFLHSLRD			380	0.00199948	1	VDNKFSKEVVDATIEIHYLPNLNRGQKCAFIFSLFD			380	0.00194769	1	VDNKFNKEWSYASGQILLLPNLNGNQLDAFVNSLYD							0.00219208	0.001		0.001	0.001		0.00299948	0.001		0.001	0.00279459
381	0.00119208	1	VDNKFNKEVCDAYSEIFLLPNLNVYQIVAFIRSLDN			381	0.00250179	3	VDNKFTKEVPNASDQIFLLPNLNDYQVLAFLHSLRD			381	0.00199948	1	VDNKFSKEVVDATIEIHYLPNLNRVQKCAFIFSLFD			381	0.00194769	1	VDNKFNKEWSYASSQICHLPNLNGCQQPAFIDSLVD							0.00219208	0.001		0.00433572	0.001		0.001	0.001		0.001	0.00279459
382	0.00119208	1	VDNKFNKEVCDAYSEIFLLPNLNVDQILAFVLSLDN			382	0.00250179	3	VDNKFTKEVPNASDQISLLPNLNDYQVLAFLHSLRD			382	0.00199948	1	VDNKFSKEVVDATIEIHYLPNLNRYQKCAFIFSLFD			382	0.00194769	1	VDNKFNKEWSSATCQILVLPNLNACQGAAFLDSLRN							0.001	0.0026065		0.001	0.00308121		0.00299948	0.0203446		0.001	0.001
383	0.00119208	1	VDNKFNKEVCDAYAQIGNLPNLNVYQIVAFIRSLDN			383	0.00250179	3	VDNKFTKEVPNASDQIFILPNLNDYQVLAFLHSLRD			383	0.00199948	1	VDNKFSKEVVDATIEIHYLPNLNLDQECAFVFSLRD			383	0.00194769	1	VDNKFNKEWSSATFQILCLPNLNVCQKKCLRSQPAQ							0.00219208	0.001		0.00266786	0.001		0.001	0.001		0.00294768	0.001
384	0.00119208	1	VDNKFNKEVCDACAQIGNLPNLNVYQIVAFIRSLDN			384	0.00250179	3	VDNKFTKEVPNASDQIFLLPNLNDYQVLAFLHSLRD			384	0.00199948	1	VDNKFSKEVVDATIEIHYLPNLNLNQEAAFLCSLFD			384	0.00194769	1	VDNKFNKEWSSAALEILALPNLNRCQEPAFVSSLCN							0.001	0.0026065		0.001	0.00308121		0.00299948	0.001		0.00294768	0.001
385	0.00119208	1	VDNKFNKEVCDAFAQICYLPNLNGYQMSAFIFSLSD			385	0.00250179	3	VDNKFTKEVPNASDQIFLLPNLNDYQVLAFLHSLRD			385	0.00199948	1	VDNKFSKEVVDATIEIHYLPNLNLHQKIAFIFSLYD			385	0.00194769	1	VDNKFNKEWSSAVVQILNLPNLNGFQECAFVGSLID							0.00338416	0.001		0.00266786	0.00308121		0.00299948	0.00293446		0.001	0.00279459
386	0.00119208	1	VDNKFNKEVCDAYAQIGNLPNLNVYQIVAFIRSLDN			386	0.00250179	3	VDNKFTKEVPNASDQIFLLPNLNDYQVLAFLHSLRD			386	0.00199948	1	VDNKFSKEVVDATIEIHYLPNLNLDQVIAFVISLFD			386	0.00194769	1	VDNKFNKEWSSAIHQICNLPNLNLNQGGAFVSSLVN							0.00219208	0.001		0.00266786	0.001		0.001	0.00293446		0.00294768	0.001
387	0.00119208	1	VDNKFNKEVCAAFYQIARLPNKRVPDVCLRSQPV*			387	0.00250179	3	VDNKFTKEVPNASDQIFLLPNLNDYQVLTFLHSLRD			387	0.00199948	1	VDNKFSKEVVDATIEIHYLPNLNDSQKVAFVGSLFD			387	0.00194769	1	VDNKFNKEWINATDQIVRLPNLNQNQRRAFIPSPGR							0.00219208	0.001		0.001	0.001		0.001	0.001		0.001	0.001
388	0.00119208	1	VDNKFNKEVCYANFEIGHLPNLNVYQRYAFVNSLGN			388	0.00250179	3	VDNKFTKEVPNASDQIFLLPNLNDYQVLASLHSLRD			388	0.00199948	1	VDNKFSKEVVDATIEIHYLPNLNDSQQVAFLFSLSN			388	0.00194769	1	VDNKFNKEWINASVEICGLPNLNLSQVSAFIPSLCN							0.0069604	0.00742601		0.00266786	0.001		0.00899792	0.00293446		0.001	0.00279459
389	0.00119208	1	VDNKFNKEVCYAYAQIGNLPNLNVYQIVAFIRSLDN			389	0.00250179	3	VDNKFTKEVPNASDQIFLLPNLNDYQVLAFLHRLRD			389	0.00199948	1	VDNKFSKEVVDATIEIHYLPNLNDAQRIAFIFSLFD			389	0.00194769	1	VDNKFNKEWINASLQILNLPNLNGRQEFAFLLSLSD							0.00338416	0.001		0.001	0.001		0.001	0.001		0.001	0.001
390	0.00119208	1	VDNKFNKEVCNAFREIFPLPNLNVSQGYAFVVSLPD			390	0.00250179	3	VDNKFTKEVPNASDQIFLLPNLNDYQVLAFLHSLRD			390	0.00199948	1	VDNKFSKEVVDATIEIHYLPNLNDAQRIAFIFSLFD			390	0.00194769	1	VDNKFNKEWINASYQILALPNLNGLPEGRLPRQPGR							0.00219208	0.001		0.001	0.00308121		0.001	0.001		0.00294768	0.001
391	0.00119208	1	VDNKFNKEVCDAFVEINCLPNLNVGQRPAFVSSLDN			391	0.00250179	3	VDNKFTKEVPNASDQIFLLPNLNDYQVLAFLHSLPNLNLSQERAFIISLNN			391	0.00199948	1	VDNKFSKEVVDATIEIHYLPNLNESQEHAFIISLYN			391	0.00194769	1	VDNKFNKEWINAIDQIIRLPNLNDIQEPAFVSSLAN							0.00457624	0.0026065		0.001	0.001		0.001	0.001		0.001	0.00458918
392	0.00119208	1	VDNKFNKEVCAADVQICDLPNLNRRQRAAFVCSLDD			392	0.00250179	3	VDNKFTKEVPNASDQIFLLPNLNDYQVLAFLHSLRN			392	0.00199948	1	VDNKFSKEVVDATIEIHYLPNLNESQVSAFIFSLFD			392	0.00194769	1	VDNKFNKEWITASGQILSLPNLNEVQGFAFLFSLND							0.00934456	0.017065		0.001	0.001		0.001	0.001		0.001	0.001
393	0.00119208	1	VDNKFNKEVCYAIIEIYSLPNLNREQGGAFIVSLWD			393	0.00250179	3	VDNKFTKEVPNASDQIFLLPNLNDYQVLAFLHSLFD			393	0.00199948	1	VDNKFSKEVVDATIEIHYLPNLNESQVVAFVVSLFD			393	0.00194769	1	VDNKFNKEWIDASAEICDLPNLNGSQEPAFVISLDD							0.001	0.0026065		0.00433572	0.0197309		0.00299948	0.001		0.001	0.001
394	0.00119208	1	VDNKFNKEVFDAYAQIGNLPNLNVGQINAFVVSLAN			394	0.00250179	3	VDNKFTKEVPNASDQIFLLPNLNDYQVLAFLHILRD			394	0.00199948	1	VDNKFSKEVVDATIEIHYLPNLNERQVVAFICSLFD			394	0.00194769	1	VDNKFNKEWIDATFQILCLPNLNVDQESAFVSSLID							0.001	0.0026065		0.0110072	0.00516242		0.001	0.001		0.001	0.001
395	0.00119208	1	VDNKFNKEVFNADRQIADLPNLNETQVFAFLFSLLD			395	0.00250179	3	VDNKFTKEVPNASDQIFLLPNLNDYQVLAFLYSLRD			395	0.00199948	1	VDNKFSKEVVDATIEIHYLPNLNEGQVVAFVVSLCD			395	0.00194769	1	VDNKFNKEWIDATFEILCLPNLNLDQESAFIPSLHN							0.001	0.00421301		0.001	0.001		0.00499896	0.001		0.001	0.00279459
396	0.00119208	1	VDNKFNKEVFNAVCEIGFLPNLNLGQVNAFVHSLLD			396	0.00250179	3	VDNKFTKEVPNASDQIFLLPNLNDYQVLAFLHSLRD			396	0.00199948	1	VDNKFSKEVVDATIEIHYLPNLNEGQVVAFVVSLFD			396	0.00194769	1	VDNKFNKEWIDATHEICVLPNLNAVQEHAFISSLFD							0.00219208	0.001		0.001	0.001		0.00499896	0.00293446		0.001	0.001
397	0.00119208	1	VDNKFNKEVFTAVSQITVLPNLNPTQVVAFLRSLCD			397	0.00250179	3	VDNKFTKEVPNASDQIFLLPNLDDYQVLAFLHSLRD			397	0.00199948	1	VDNKFSKEVVDATIEIHYLPNLNEVQRIAFIFSLFD			397	0.00194769	1	VDNKFNKEWIDAVDQILTLPNLNGVQGCAFLDSLPN							0.001	0.00421301		0.001	0.00516242		0.001	0.00293446		0.00294768	0.001
398	0.00119208	1	VDNKFNKEVFDAYYEIPILPNLNVYQIVAFIRSLDN			398	0.00250179	3	VDNKFTKEVPNASDQIFLLPSLNDYQVLAFLHSLRD			398	0.00199948	1	VDNKFSKEVVDATIEIHYLPNLNANQVIALVCSLFD			398	0.00194769	1	VDNKFNKEWIDASREICRLPNLNGDQRFAFVHSLDN							0.001	0.00581951		0.00433572	0.00308121		0.001	0.00680338		0.001	0.001
399	0.00119208	1	VDNKFNKEWSYAIREIGFLPNLNQYQRCAFVNSLGD			399	0.00250179	3	VDNKFTKEVPNASDQVFLLPNLNDYQVLAFLHSLRD			399	0.00199948	1	VDNKFSKEVVDATIEIHYLPNLNANQVIAFIFSLFD			399	0.00194769	1	VDNKFNKEWIAATTQICDLPNLNRDQVPAFLVSLGD							0.0069604	0.001		0.001	0.001		0.00299948	0.001		0.001	0.00817836
400	0.00119208	1	VDNKFNKEWITADVEICILPNLNEIQRSAFVFSLHD			400	0.00250179	3	VDNKFTKEVPNASGQIFLLPNLNDYQVLAFLHSLRD			400	0.00199948	1	VDNKFSKEVVDATIEIHYLPNLNANQVIAFVFSLFD			400	0.00194769	1	VDNKFNKEWIAAIDQICSLPNLNGSQGAAFVSSLRD							0.001	0.00421301		0.00266786	0.001		0.001	0.0126068		0.001	0.001
401	0.00119208	1	VDNKFNKEWINASAQIAGLPNLNVVQVIAFLFSLVD			401	0.00250179	3	VDNKFTKEVPTHLIKFFSCRT*TTIRCLPSYTACVT			401	0.00199948	1	VDNKFSKEVVDATIEIHYLPNLNAGQRLAFIYSLFD			401	0.00194769	1	VDNKFNKEWIAAVHEIVTLPNLNRFQVVAFVPSLGD							0.00338416	0.001		0.00433572	0.00516242		0.001	0.00293446		0.001	0.00279459
402	0.00119208	1	VDNKFNKEWIAATDEITGLPNLNGCQGGAFLVSLCD			402	0.00250179	3	VDNKFTKEVPDASDQIFLLPNLNDYQVLAFLHSLRD			402	0.00199948	1	VDNKFSKEVVDATIEIHYLPNLNGDQRCAFLTSLCD			402	0.00194769	1	VDNKFNKEWIAASYEICSLPNLNVVQRPAFLHSLND							0.00338416	0.001		0.001	0.00308121		0.001	0.001		0.001	0.00279459
403	0.00119208	1	VDNKFNKEWPSANVQIPVLPNLNPGQKCAFVYSLFD			403	0.00250179	3	VDNKFTKEVLNASDQIFLLPNLNDYQVLAFLHSLRD			403	0.00199948	1	VDNKFSKEVVDATIEIHYLPNLNGDQKCAFIFSLFD			403	0.00194769	1	VDNKFNKEWIAASSQICNLPNLNGYQECAFICSLFD							0.001	0.0026065		0.001	0.00308121		0.001	0.001		0.001	0.00279459
404	0.00119208	1	VDNKFNKEWRNAYNQIVFLPNLNLLQGFAFIGSLFD			404	0.00250179	3	VDNKFYKEWCAASSEIVCQTRTR*TPSSLA*MT			404	0.00199948	1	VDNKFSKEVVDATIEIHYLPNLNGAQVRAFVHSLRN			404	0.00194769	1	VDNKFNKEWIAASDQILVLPNLNRTQVRAFVPSLAN							0.00219208	0.001		0.001	0.001		0.001	0.001		0.00294768	0.001
405	0.00119208	1	VDNKFNKEWRTADREILGLPNLNRPQESAFVNSLTN			405	0.00250179	3	VDNKFSKEGRSAYCQILVLPNLNQAQRCAFIASLFN			405	0.00199948	1	VDNKFSKEVVDATIEIHYLPNLNGHQMHAFLGSLVD			405	0.00194769	1	VDNKFNKEWIAATNQILCLPNLNHGQMRAFVDSLGD							0.00219208	0.001		0.00433572	0.00516242		0.001	0.001		0.001	0.001
406	0.00119208	1	VDNKFNKEWRNAILEILSLPNLNPPQGPAFVSSLID			406	0.00333572	4	VDNKFTKEVPNASDQIFLLPNLNDYQVLAFLHSLRD			406	0.00199948	1	VDNKFSKEVVDATIEIHYLPNLNVIQVCAFIFSLFD			406	0.00194769	1	VDNKFNKEWIAATRQIVSLPNLNVIQGDAFVPSLTD							0.001	0.0026065		0.001	0.00308121		0.001	0.00293446		0.001	0.00279459
407	0.00119208	1	VDNKFNKEWLAAIRQIDGLPNLNGSQGYAFLLSLYN			407	0.00333572	4	VDNKFNKELFNAAFEIVSLPNLNLSQERSFIISLNN			407	0.00199948	1	VDNKFSKEVVDATIEIHYLPNLNVRQVFAFICSLSN			407	0.00194769	1	VDNKFNKEWIAATAQICRLPNLNGDQRSAFVPSLSN							0.00219208	0.001		0.001	0.00308121		0.00299948	0.001		0.00294768	0.001
408	0.00119208	1	VDNKFNKEWDNATSEILSLPNLNVSQGGAFISSLRN			408	0.00333572	4	VDNKFTKEAPNASDQIFLLPNLNDYQVLAFLHSLRD			408	0.00199948	1	VDNKFSKEVVDATIEIHYLPNLNVDQKCAFIFSLFD			408	0.00194769	1	VDNKFNKEWIAASVQILNLPNLNLGQRHAFLPSLGD							0.00338416	0.00581951		0.001	0.00308121		0.001	0.00293446		0.001	0.001
409	0.00119208	1	VDNKFNKEWGTATSQIYRLPNLNPCQQLAFIGSLSD			409	0.00333572	4	VDNKFTKEVPNTSDQIFLLPNLNDYQVLAFLHSLRD			409	0.00199948	1	VDNKFSKEVVDATIEIHYLPNLNVDQRHAFIFSLFD			409	0.00194769	1	VDNKFNKEWIAAFPEIRSLPNLNRRQGSAFIRSLGN							0.00338416	0.001		0.001	0.001		0.001	0.001		0.001	0.001
410	0.00119208	1	VDNKFNKEWGDAADEIGLLPNLNAHQRRAFLDSLNN			410	0.00333572	4	VDNKFTKEVPNASDQIFLLPNLNDYQVLAFLHSLRD			410	0.00199948	1	VDNKFSKEVVDATIEIHYLPNLNVDQRHAFIFSLFD			410	0.00194769	1	VDNKFNKEWIAAFPEIRSLPNLNRRQGDAFLRSLVD							0.001	0.0026065		0.001	0.001		0.001	0.001		0.001	0.001
411	0.00119208	1	VDNKFNKEWGTASDEIRDLPNLNGPQERAFVINLSD			411	0.00333572	4	VDNKFTKEVPNASDQIFSCRT*TTIRCLPSYTACVT			411	0.00199948	1	VDNKFSKEVVDATIEIHYLPNLNVDQRLAFIFSLFD			411	0.00194769	1	VDNKFNKEWIYATCQILDLPNLNACQGHAFIDSLGD							0.001	0.0026065		0.001	0.001		0.001	0.00293446		0.001	0.001
412	0.00119208	1	VDNKFNKEWGAADLEIAGLPNLNEVQRRAFLNSLYD			412	0.00333572	4	VDNKFTKEVPNASDQIFLLPNLNEYQVLAFLHSLRD			412	0.00199948	1	VDNKFSKEVVDATIEIHYLPNLNVDQRVSFIFSLFD			412	0.00194769	1	VDNKFNKEWIYASDQILLLPNLNGCQLAAFIDSLCD							0.001	0.0026065		0.001	0.001		0.001	0.001		0.001	0.00458918
413	0.00119208	1	VDNKFNKEWVSANGEIVCLPNLNPPQGPAFVSSLID			413	0.00333572	4	VDNKFTKEVPNASDQIFLLPNLNDYQVRAFIISLNN			413	0.00199948	1	VDNKFSKEVVDATIEIHYLPNLNCDQKCAFIFSLFD			413	0.00194769	1	VDNKFNKEWIYATTQIINLPNLNQYQGRAFVYSLSD							0.001	0.00421301		0.001	0.001		0.001	0.001		0.001	0.001
414	0.00119208	1	VDNKFNKEWVAAFLQIFSLPNLNVYQIVAFIRSLDN			414	0.00333572	4	VDNKFTKEVPNASDQIFLLPNLNDYQVLAFLHSLRD			414	0.00199948	1	VDNKFSKEVVDATIEIHYLPNLNFDQRHAFIFSLFD			414	0.00194769	1	VDNKFNKEWISASCEILSLPNLNEDQLPAFLSSLSN							0.00219208	0.001		0.00266786	0.001		0.001	0.001		0.001	0.00279459
415	0.00119208	1	VDNKFNKEWYAATGEILNLPNLNENQGTAFVISLDN			415	0.00333572	4	VDNKFTKEVPNASDQIFLLPNLNDYQVLDFLHSLRD			415	0.00199948	1	VDNKFSKEVVDATIEIHYLPNLKRDQKCAFIFSLFD			415	0.00194769	1	VDNKFNKEWINAARQILILPNLNDCQLGAFVDSLVD							0.00219208	0.001		0.00433572	0.001		0.00499896	0.001		0.00489537	0.001
416	0.00119208	1	VDNKFNKEWSNAYAQIRYLPNLNPPQLGAFVDSLFD			416	0.00333572	4	VDNKFTKEVPNASDQIFLLPNLNDYQVLAFLHSLRD			416	0.00199948	1	VDNKFSKEVVDATIEIHYLPNLIRDQKCAFIFSLFD			416	0.00194769	1	VDNKFNKEWINASAQILRLPNLNDSQECAFVGSLIN							0.00338416	0.00421301		0.0110072	0.0134873		0.001	0.0242135		0.00294768	0.001
417	0.00119208	1	VDNKFNKEWSTAFGEIFFLPNLNADQVAAFINSLHD			417	0.00333572	4	VDNKFTKEVPNASDQIFLLPNLNDYQVLAFLHSLRG			417	0.00199948	1	VDNKFSKEVVDATIEIHYLPNLNRDQKCAFIFSLFD			417	0.00194769	1	VDNKFNKEWINASYQILACRT*TWSRQLPSSLAWVT							0.00219208	0.001		0.012675	0.00308121		0.001	0.00486892		0.001	0.001
418	0.00119208	1	VDNKFNKEWCDAVAEISYLPNLNPPQGPAFVSSLID			418	0.00333572	4	VDNKFTKEVPNASDQIFLLPNLNDYRVLAFLHSLRD			418	0.00199948	1	VDNKFSKEVVDATIEIHYLPILNRDQKCAFIFSLFD			418	0.00194769	1	VDNKFNKEWINAVAQIVSLPNLNAFQQPAFVDSLGN							0.00219208	0.001		0.001	0.00516242		0.001	0.001		0.001	0.001
419	0.00119208	1	VDNKFNKEWCDAVVQIVRLPNLNVDHGCAFVHSLRD			419	0.00333572	4	VDNKFTKEVPNASDQIFLLPNLNDCQVLAFLHSLRD			419	0.00199948	1	VDNKFSKEVVDATIEIHYLPNLNRDQKCAFIFSLFD			419	0.00194769	1	VDNKFNKEWINAVYQIIALPNLNPFQQDAFVGSLVD							0.00219208	0.001		0.001	0.001		0.001	0.00293446		0.001	0.00279459
420	0.00119208	1	VDNKFNKEWCSASSEIRSAELKRESAACLR*QPA*			420	0.00333572	4	VDNKFTKEVPNASDQIFLLPNLNDYQVLAFLHSLRD			420	0.00199948	1	VDNKFSKEVVDATIEIHYLLNLNRDQKCAFIFSLFD			420	0.00194769	1	VDNKFNKEWITATHEILRLPNLNRYQGPAFVCSLCN							0.00219208	0.001		0.001	0.00308121		0.001	0.001		0.001	0.00279459
421	0.00119208	1	VDNKFNKEWCNAFNEIICLPNLNHIQRHAFLFSLYD			421	0.00333572	4	VDNKFTKEVPNASDQIFLLPNLNDYQVLAFLHSLRD			421	0.00199948	1	VDNKFSKEVVDATIEIHYLSNLNRDQKCAFIFSLFD			421	0.00194769	1	VDNKFNKEWITAIDEIINLPNLNQYQECAFLNSLGD							0.001	0.0026065		0.001	0.001		0.001	0.001		0.001	0.00638377
422	0.00119208	1	VDNKFNKEWCTAVSEIFVLPNLNAGQKVAFLGSLAD			422	0.00333572	4	VDNKFTKEVPNASDRIFLLPNLNDYQVLAFLHSLRD			422	0.00199948	1	VDNKFSKEVVDATIEIHSLPNLNRDQKCAFIFSLFD			422	0.00194769	1	VDNKFNKEWITAIVEICSLPNLNRYQGPAFVCSLDD							0.001	0.0026065		0.001	0.001		0.001	0.001		0.001	0.001
423	0.00119208	1	VDNKFNKEWCTAYRQIFALPNLNVGQGGAFICSLDD			423	0.00333572	4	VDNKFTKEVSNASDQIFLLPNLNDYQVLAFLHSLRD			423	0.00199948	1	VDNKFSKEVVDATIEIHFLPNLNQVQRVAFIFSLFD			423	0.00194769	1	VDNKFNKEWITAVDEICLLPNLNVDQGGAFVYSLPD							0.00219208	0.001		0.00266786	0.001		0.001	0.00293446		0.00294768	0.001
424	0.00119208	1	VDNKFNKEWCAADSQIFGLPNLNAIQGCAFVSSLRD			424	0.00333572	4	VDNKFTKEGNDAADEIFILPNLNVTQVYAFLTSLRN			424	0.00199948	1	VDNKFSKEVVDATIEIHFLPNLNRDQKCAFIFSLFD			424	0.00194769	1	VDNKFNKEWIDATIQICVLPNLNRNQQDAFVDSLGN							0.00219208	0.00421301		0.001	0.001		0.001	0.001		0.001	0.001
425	0.00119208	1	VDNKFNKEWFNAIYQISLLPNLNAIQVNAFVPSLGD			425	0.00333572	4	VDNKFTKEVPNASDQIFLLPNLNDYQVLAFLHSLRD			425	0.00199948	1	VDNKFSKEVVDATIEIHFLPNLNVDQRHAFIFSLFD			425	0.00194769	1	VDNKFNKEWIDATCQILNLPNLNGVQESAFVYSLVN							0.001	0.0026065		0.001	0.001		0.001	0.001		0.00294768	0.001
426	0.00119208	1	VDNKFNKEWFSAATEIVSLPNLNRFQKVAFLHSLAD			426	0.00333572	4	VDNKFYKELCSAADEIFVLPNLNDDQVLAFINSLLN			426	0.00199948	1	VDNKFSKEVVDATIEIHFLPNLNVDQRVAFIFSLFD			426	0.00194769	1	VDNKFNKEWIDAANEILNLPNLNLVQEVAFVDSLTN							0.00219208	0.0026065		0.001	0.00308121		0.001	0.00293446		0.00294768	0.001
427	0.00119208	1	VDNKFNKEWFNAIVEIRNLPNLNVVQLCAFLGNLHD			427	0.00333572	4	VDNKFYKELCSAADEIFVLPNLNDDQVLAFLHSLRN			427	0.00199948	1	VDNKFSKEVVDATIEIHFLPNLNRDQKCAFIFSLFD			427	0.00194769	1	VDNKFNKEWIDASAQILDLPNLNRCQRSAFVSSLPD							0.00219208	0.001		0.001	0.001		0.001	0.001		0.001	0.00279459
428	0.00119208	1	VDNKFNKELNTADLEIIVLPNLNEGQLSAFIGSLHD			428	0.00333572	4	VDNKFYKELCSAADEIFVLPNLNDYQVLAFINSLRN			428	0.00199948	1	VDNKFSKEVVDATIEIHILPNLNDAQRIAFIFSLFD			428	0.00194769	1	VDNKFNKEWIAASSQIRLLPNLNDPQVAAFIVSLLD							0.001	0.0026065		0.0110072	0.00308121		0.00299948	0.001		0.001	0.001
429	0.00119208	1	VDNKFNKELTSATLEIAFLPNLNASQITAFLISLGD			429	0.00333572	4	VDNKFYKELCSAADEIFVLPNLNDYQVLAFLHSLRN			429	0.00199948	1	VDNKFSKEVVDATIEIHFLPNLNDAQRIALIFSLFD			429	0.00194769	1	VDNKFNKEWIAASIQILTLPNLNVGQGFAFLGSLRN							0.00219208	0.001		0.001	0.001		0.001	0.00293446		0.001	0.001
430	0.00119208	1	VDNKFNKELTDAIGQIDCLPNLNAYQQFAFLRSLIN			430	0.00333572	4	VDNKFSKEVCDAIHEIHFLPNLNDAQRIAFIFSLFD			430	0.00199948	1	VDNKFSKEVVDATIEIHFLPNLNDAQRIAFIFSLFD			430	0.00194769	1	VDNKFNKEWIAASAQICDLPNLNAGQEGAFVFSLDN							0.00219208	0.001		0.001	0.00308121		0.001	0.0242135		0.001	0.00279459
431	0.00119208	1	VDNKFNKELSDAYAQIGNLPNLNVYQIVAFIRSLDN			431	0.00416965	5	VDNKFNKELFNAAFEIVSLPNLNISQERAFIISLNN			431	0.00199948	1	VDNKFSKEVVDATIEIHFLPNLNDAQRIAFIFSLFD			431	0.00194769	1	VDNKFNKEWIAASYQICRLPNLNVYQGGAFISSLAD							0.001	0.0026065		0.00266786	0.001		0.001	0.001		0.001	0.001
432	0.00119208	1	VDNKFNKELSYAVNEIGLLPNLNANQRCAFLDSLAN			432	0.00416965	5	VDNKFTKEVPNASDQIFLLPNLNDYQVLAFLHSLRD			432	0.00199948	1	VDNKFSKEVVDATIEIHFLPNLNDAQRIAFIFSLFD			432	0.00194769	1	VDNKFNKEWIAATSQIISLPNLNVAQEHAFLGSLSD							0.001	0.00421301		0.00433572	0.00724363		0.001	0.001		0.00294768	0.001
433	0.00119208	1	VDNKFNKELSTATREISYLPNLNGNQMTAFVNSLCN			433	0.00416965	5	VDNKFTKEVPNASDQIFLLPNLNDYQVPAFLHSLRD			433	0.00199948	1	VDNKFSKEVVDATIEIHFLPNLNESQVVAFVVSLFD			433	0.00194769	1	VDNKFNKEWIAATREICVLPNLNRVQQDAFVPSLCD							0.00219208	0.0026065		0.0360251	0.0301369		0.001	0.00293446		0.001	0.00279459
434	0.00119208	1	VDNKFNKELRDAAIQIHNLPNLNVIQGYAFINSLHD			434	0.00416965	5	VDNKFTKEVPNASDQIFLLPNLNDYQVLALLHSLRD			434	0.00199948	1	VDNKFSKEVVDATIEIHFLPNLNANQVIAFVCSLFD			434	0.00194769	1	VDNKFNKEWIAASHEIVRLPNLNGVQGAAFVSSLTD							0.00219208	0.001		0.001	0.001		0.001	0.001		0.001	0.001
435	0.00119208	1	VDNKFNKELGTAYFQISLLPNLNPCQIAAFISSLVD			435	0.00416965	5	VDNKFTKEVPNASDQIFLLPNLNDYQVLALLHSLRD			435	0.00199948	1	VDNKFSKEVVDATIEIHFLPNLNVDQRIAFIFSLFD			435	0.00194769	1	VDNKFNKEWIAASLEISVLPNLNLSQGNAFVGSLYD							0.00219208	0.001		0.001	0.001		0.00299948	0.0300169		0.001	0.001
436	0.00119208	1	VDNKFNKELVNAYYQIAYLPNLNVFQLCAFIVSLDN			436	0.00416965	5	VDNKFTKEVPNASDQIFLLPNLNDYQVLAFLNSLRD			436	0.00199948	1	VDNKFSKEVVDATIEIHFLPNLNVVQKVAFIFSLFD			436	0.00194769	1	VDNKFNKEWIAASYQILCLPNLNVAQGDAFVGSLLD							0.00338416	0.00581951		0.001	0.00308121		0.001	0.001		0.001	0.001
437	0.00119208	1	VDNKFNKELVNAYYQIAYLPNLNVFQLCAFIVSLGD			437	0.00416965	5	VDNKFTKEVPNASDQIFLLPNLNDYQVLAFLHSMRD			437	0.00199948	1	VDNKFSKEVVDATIEIRYLPNLNRDQKCAFIFSLFD			437	0.00194769	1	VDNKFNKEWIAASCEIVRLPNLNLIQGPAFIDSLDD							0.0129208	0.010639		0.00266786	0.001		0.001	0.001		0.001	0.001
438	0.00119208	1	VDNKFNKELVYANAQIVCLPNLNQNQEYAFVSSLID			438	0.00416965	5	VDNKFTKEVPNASDQIFLLPNLNDYQVLAFLHSPRD			438	0.00199948	1	VDNKFSKEVVDATIEILCLPNLNHSQLGAFIHSLSN			438	0.00194769	1	VDNKFNKEWIYASREIVNLPNLNQAQESAFLSSLGD							0.101135	0.0218845		0.001	0.001		0.001	0.001		0.001	0.00279459
439	0.00119208	1	VDNKFNKELVDASSEIHSLPNLNHDQRAAFVSSLID			439	0.00416965	5	VDNKFTKEVPNASDQIFLLPNLNDYQVLAFLHSLHD			439	0.00199948	1	VDNKFSKEVVDATIEFHYLPNLNRDQKCAFIFSLFD			439	0.00194769	1	VDNKFNKEWIYATDQICGLPNLNHVQGSAFVDSLSD							0.001	0.0026065		0.00266786	0.00516242		0.001	0.001		0.001	0.00458918
440	0.00119208	1	VDNKFNKELYAAFGEISYLPNLNQVQLSAFLVSLVD			440	0.00416965	5	VDNKFTKEVPNASDQIFLLPNLNDYQVLAFLHSLRD			440	0.00199948	1	VDNKFSKEVVDATFEISSLPNLNDGQENAFVISLID			440	0.00194769	1	VDNKFNKEWIYATCQILSLPNLNRNQGVAFLGSLPN							0.00219208	0.001		0.001	0.001		0.00299948	0.001		0.00294768	0.001
441	0.00119208	1	VDNKFNKELYYAYLEIGFLPNLNEGQRSAFVGSLCN			441	0.00416965	5	VDNKFTKEVPNASDQIFLLPNLNDYQLLAFLHSLRD			441	0.00199948	1	VDNKFSKEVVDAIHEIHYLPNLNRDQKCAFIFSLFD			441	0.00194769	1	VDNKFNKEWIYASLQINRLPNLNPDQENAFILSLID							0.00219208	0.001		0.001	0.001		0.00699844	0.001		0.001	0.001
442	0.00119208	1	VDNKFNKELSYADYEILTLPNLNHRQRSAFVASLAD			442	0.00416965	5	VDNKFTKEVPNASDQIFLLPNLNEVQERAFVNSLFD			442	0.00199948	1	VDNKFSKEVVDAIHEIHFLPNLNDAQRIAFIFRLFD			442	0.00194769	1	VDNKFNKEWIYASAQILRLPNLNPGQGGAFVCSLCD							0.001	0.0026065		0.001	0.001		0.001	0.00293446		0.001	0.001
443	0.00119208	1	VDNKFNKELCDAYAQIGNLPNLNVYQIVAFIRSLDN			443	0.00416965	5	VDNKFTKEVPNASDQIFLLPNLNDYQVLAFLHSLRD			443	0.00199948	1	VDNKFSKEVVDAIHEIHFLPNLNDAQRIAFIFSLFD			443	0.00194769	1	VDNKFNKEWIYASAQILRLPNLNPSQRIAFISSLPD							0.00219208	0.001		0.0110072	0.0280557		0.001	0.001		0.001	0.001
444	0.00119208	1	VDNKFNKELCNATRQIGHLPNLNVDQRRAFLNSLSD			444	0.00416965	5	VDNKFTKELCSAADEIFVLPNLNDDQVLAFINSLRN			444	0.00199948	1	VDNKFSKEVVDAIHEIHFLPNLNDAQRIAFIFSLFD			444	0.00194769	1	VDNKFNKEWISATCQICYLPNLNAAQELAFVGSLAN							0.001	0.0026065		0.00600359	0.00308121		0.001	0.00293446		0.00294768	0.00458918
445	0.00119208	1	VDNKFNKELCAAVSEIYVLPNLNPNQVNAFICSLFN			445	0.00416965	5	VDNKFAKEVPNASDQIFLLPNLNDYQVLAFLHSLRD			445	0.00199948	1	VDNKFSKEVVDAIHEIHFLPNLNDAQRIAFIFSLFD			445	0.00194769	1	VDNKFNKEWISATCQICCLPNLNQGQRAAFLGSLPN							0.001	0.0026065		0.0110072	0.00932484		0.001	0.00293446		0.001	0.001
446	0.00119208	1	VDNKFNKELFSAFLQITLLPNLNGFQGLAFLNSLFD			446	0.00500359	6	VDNKFNKELPNASDQIFLLPNLNDYQVLAFLHSLRD			446	0.00199948	1	VDNKFSKEVVDAIHEIHFLPNLNDAQRIAFVFSLFD			446	0.00194769	1	VDNKFNKEWISATCQICCLPNLNVHQGFAFVRSLYN							0.001	0.0026065		0.00266786	0.001		0.001	0.00486892		0.001	0.001
447	0.00119208	1	VDNKFNKEGVRYPPSLLAWPT			447	0.00500359	6	VDNKFNKELCSAADEIFVLPNLNDYQVLAFLHSLRD			447	0.00199948	1	VDNKFSKEVVDAIHEIHFLPNLNDAQRISFIFSLFD			447	0.00194769	1	VDNKFNKEWISATVEICSLPNLNLPQQHAFVPSLDD							0.00219208	0.001		0.001	0.001		0.001	0.001		0.001	0.001
448	0.00119208	1	VDNKFNKGVCDAYAQIGNLPNLNAFQEFAFIFSLTN			448	0.00500359	6	VDNKFTKEVPNASDQIFLLPNLNDYQVLAFLHSLRD			448	0.00199948	1	VDNKFSKEVVDAIHEIHFLPNLNDAQSIAFIFSLFD			448	0.00194769	1	VDNKFNKEWISAAYEIVALPNLNGAQRHAFVGSLPN							0.00219208	0.001		0.001	0.00308121		0.001	0.00293446		0.001	0.00279459
449	0.00119208	1	VDNKFNKGVCDAYAQIGNLPNLNVYQIVAFIRSLHN			449	0.00500359	6	VDNKFTKEVPNASDQIFLLPNLNDYQVLAFLHSLRD			449	0.00199948	1	VDNKFSKEVVDAIHEIHFLPNLNDSQRIAFIFSLFD			449	0.00194769	1	VDNKFNKEWISASNEISALPNLNLCQECAFLSSLSD							0.00219208	0.001		0.001	0.001		0.001	0.00293446		0.001	0.001
450	0.00119208	1	VDNKFNNEVCDAYAQIGNLPNLNVYQIVAFIRSLDN			450	0.00500359	6	VDNKFTKEVPNASDQIFLLPNLNNYQVLAFLHSLRD			450	0.00199948	1	VDNKFSKEVVDAIHEIHFLPNLNVIQVCAFIFSLFD			450	0.00194769	1	VDNKFNKEWHNAIVQISSLPNLNVVQQAAFVPSLWD							0.0212654	0.010639		0.001	0.00308121		0.00899792	0.001		0.001	0.00279459
451	0.00119208	1	VDNKFKKEVCDAYAQIGNLPNLNVYQIVAFIRSLDN			451	0.00500359	6	VDNKFTKEVPNASDQIFLLPNLNLSQERAFLHSLRD			451	0.00199948	1	VDNKFSKEVVDAIHEIHFLPNLNVDQRHAFIFSLFD			451	0.00194769	1	VDNKFNKEWHNAVSEICGLPNLNQAQGRAFLGSLGD							0.00219208	0.001		0.00266786	0.00516242		0.001	0.001		0.001	0.001
452	0.00119208	1	VDNKFNKEGNYAFVQIHDLPNLNARQKPAFLVSLCD			452	0.00500359	6	VDNKFTKEVPNASDQIFLLPNLNDYKVLAFLHSLRD			452	0.00199948	1	VDNKFSKEVVDAIFEIFVLPNLNESQVSAFIFSLFD			452	0.00194769	1	VDNKFNKEWHNAVAEICALPNLNACQEGAFIFSLCD							0.001	0.0026065		0.001	0.001		0.001	0.001		0.001	0.001
453	0.00119208	1	VDNKFNKEGNSAACEIYYLPNLNRCQKFAFLGSLDN			453	0.00500359	6	VDNKFTKEVPNASDQIFLLPNLNDYQVLAFLQSLRD			453	0.00199948	1	VDNKFSKEVVDAIFEIFVLPNLNESQVSAFVVSLFD			453	0.00194769	1	VDNKFNKEWHNAVAEICALPNLNVGQRGAFVGSLGD							0.00219208	0.001		0.001	0.00516242		0.001	0.00293446		0.001	0.001
454	0.00119208	1	VDNKFNKEGTDAVTEIAGLPNLNAVQRAAFVRSLRN			454	0.00500359	6	VDNKFTKEVPNASDQIFLLPNLNDYQVLAFLHSLRD			454	0.00199948	1	VDNKFSKEVVDAAIEIHYLPNLNRDQKCAFIFSLFD			454	0.00194769	1	VDNKFNKEWHNASREILYLPNLNVCQGGAFVDSLFD							0.001	0.00421301		0.001	0.001		0.00499896	0.0203446		0.001	0.001
455	0.00119208	1	VDNKFNKEGSSAYIQIAILPNLNRIQLIAFINSLNN			455	0.00500359	6	VDNKFTKEVPNASDQIFLLPNLNDYQVLAFLHSLRD			455	0.00199948	1	VDNKFSKEVVDASIEIHYLPNLNRDQKCAFIFSLFD			455	0.00194769	1	VDNKFNKEWHNASYQIRLLPNLNLVQKSAFVSSLND							0.001	0.0026065		0.001	0.001		0.001	0.00293446		0.001	0.001
456	0.00119208	1	VDNKFNKEGITAILQIDNLPNLNDIQRFAFVVSLPN			456	0.00500359	6	VDNKFTKEVPNASD*IFLLPNLNDYQVLAFLHSLRD			456	0.00199948	1	VDNKFSKEVVDGTIEIHYLPNLNRDQKCAFIFSLFD			456	0.00194769	1	VDNKFNKEWHTATVQILDLPNLNAPQRPAFVFSLDD							0.001	0.0026065		0.001	0.001		0.001	0.001		0.00294768	0.001
457	0.00119208	1	VDNKFNKEGRAAVSEIVILPNLNVYQRYAFVNSLGN			457	0.00583752	7	VDNKFNKELHYAVHEIISLPNLNDYQVLAFLHSLRD			457	0.00199948	1	VDNKFSKEVVDVTIEIHYLPNLNRDQKCAFIFSLFD			457	0.00194769	1	VDNKFNKEWHTAAVQICRLPNLNDRQELAFLDSLVD							0.00934456	0.013852		0.001	0.001		0.001	0.001		0.001	0.00279459
458	0.00119208	1	VDNKFNKEGLYADVEIFNLPNLNVCQKLAFVSSLAN			458	0.00583752	7	VDNKFTKEVPNASDQIFLLPNLNDYQVLAFLHSLRD			458	0.00199948	1	VDNKFSKEVVDSTIEIHYLPNLNRDQKCAFIFSLFD			458	0.00194769	1	VDNKFNKEWHDATREICGLPNLNRGQLDAFVHSLDD							0.001	0.0026065		0.001	0.001		0.001	0.001		0.00294768	0.001
459	0.00119208	1	VDNKFNKEGANAYNQN*QSAELKPGSEVYLHRQPVQ			459	0.00583752	7	VDNKFTKEVPKASDQIFLLPNLNDYQVLAFLHSLRD			459	0.00199948	1	VDNKFSKEVVDSTIEIHYLPNLNRDQKCAFIFSLFY			459	0.00194769	1	VDNKFNKEWHDASRQILVLPNLNDVQMPAFVLSLGD							0.00219208	0.001		0.001	0.001		0.001	0.00293446		0.001	0.001
460	0.00119208	1	VDNKFNKEGADAILQIGNLPNLNVRQITAFVRSLDD			460	0.00583752	7	VDNKFTKEVPNASNQIFLLPNLNDYQVLAFLHSLRD			460	0.00199948	1	VDNKFSKEV*DAIHEIHFLPNLNPSQRLAFIFSLFD			460	0.00194769	1	VDNKFNKEWHDASREILILPNLNGDQECAFVRSLFD							0.00219208	0.001		0.00266786	0.001		0.001	0.001		0.001	0.00279459
461	0.00119208	1	VDNKFNKEGADAILQIGNLPNLNVRQITAFVRSLDD			461	0.00583752	7	VDNKFTKEVPNASDQIFLLPNLNDYQVLAFLHSLRD			461	0.00199948	1	VDNKFSKEVCDTIHEIHFLPNLNDAQRIAFIFSLFD			461	0.00194769	1	VDNKFNKEWHDASDQIVNLPNLNHSQGGAFIGSLID							0.00338416	0.00581951		0.001	0.001		0.001	0.001		0.001	0.001
462	0.00119208	1	VDNKFNKEGADAILQIGNLPNLNVRQITAFIRSLDN			462	0.00583752	7	VDNKFTKEVPNASDQIFLLPNLNDYQVLAFLHSLRD			462	0.00199948	1	VDNKFSKEVCDEIHEIHFLPNLNDYQRVAFIFSLFD			462	0.00194769	1	VDNKFNKEWHDAISQISHLPNLNARQELAFVRSLPD							0.00219208	0.00421301		0.00266786	0.001		0.001	0.001		0.00294768	0.001
463	0.00119208	1	VDNKFNKEGADAILQIGNLPNLNVRQITAFVRSLFD			463	0.00667145	8	VDNKFTKEVHNASDQIFLLPNLNDYQVLAFLHSLRD			463	0.00199948	1	VDNKFSKEVCDEIHEIHFLPNLNEPQVCAFVVSLCD			463	0.00194769	1	VDNKFNKEWHDASSEILSLPNLNEYQGHAFVSSLYD							0.001	0.0026065		0.001	0.001		0.001	0.001		0.001	0.001
464	0.00119208	1	VDNKFNKEGADAILQIGNLPNLNVRQIVAFIRSLDN			464	0.00667145	8	VDNKFTKEVPNASDQIFLLPNLNDYQVLAFLHSLRD			464	0.00199948	1	VDNKFSKEVCDAIHEIHFLPNLNDAQRIAFIFSLFD			464	0.00194769	1	VDNKFNKEWHAASIEILDLPNLNRYQRSAFVTSLDD							0.00338416	0.001		0.001	0.001		0.001	0.00293446		0.001	0.001
465	0.00119208	1	VDNKFNKEGADAILQIGNLPNLNVYQMFAFVRSLDD			465	0.00667145	8	VDNKFTKEVPNASDQIFLLPNLNLSQERAFIISLRD			465	0.00199948	1	VDNKFSKEVCDAIHEIFCLPNLNENQIVAFIISLFD			465	0.00194769	1	VDNKFNKEWHAASIEILDLPNLNGRQGDAFVGSLPD							0.001	0.0026065		0.001	0.001		0.001	0.001		0.001	0.001
466	0.00119208	1	VDNKFNKEGADAILQIGNLPNLNVYQMFAFVDSLRD			466	0.00667145	8	VDNKFTKEVPNASDQIFLLPNLNDYQVLAFLHSLRY			466	0.00199948	1	VDNKFSKEVCDAIHEIFCLPNLNEPQVCAFVVSLCD			466	0.00194769	1	VDNKFNKEWHAASVQICSLPNLNRAQQHAFLDSLPD							0.001	0.0026065		0.001	0.001		0.001	0.001		0.001	0.001
467	0.00119208	1	VDNKFNKEGADAILQIGNLPNLNADQQCAFVDSLLD			467	0.00667145	8	VDNKFTKEVPNASDQIFLLPNLNDYQVLAFLHSLCD			467	0.00199948	1	VDNKFSKEVCDAIYEIFVLPNLNESQIIAFVNSLFD			467	0.00194769	1	VDNKFNKEWHYAAAQIISLPNLNQDQEPAFIRSLPN							0.001	0.0026065		0.001	0.001		0.001	0.001		0.00294768	0.001
468	0.00119208	1	VDNKFNKEGADAYAQIGNLPNLNVYQIVAFIRSLDN			468	0.00667145	8	VDNKFYKELCSAADEIFVLPNLNDDQVLAFIISLNN			468	0.00199948	1	VDNKFSKEVCDAIHKIHFLPNLNDAQRIAFIFSLFD			468	0.00194769	1	VDNKFNKEWHYASNQILSLPNLNEHQKGAFVVSLGN							0.001	0.00421301		0.00433572	0.001		0.001	0.001		0.00294768	0.001
469	0.00119208	1	VDNKFNKEGGSASVEILGLPNLNAFQMNAFLCSLAD			469	0.00750538	9	VDNKFTKEVPNASDKIFLLPNLNDYQVLAFLHSLRD			469	0.00199948	1	VDNKFSKEVCDAIHEIIFCRT*TTLRGSPSYSACLM			469	0.00194769	1	VDNKFNKEWHYASCQIVSLPNLNGCQEGAFVPSLVN							0.00219208	0.001		0.001	0.00308121		0.001	0.001		0.001	0.001
470	0.00119208	1	VDNKFNKEGGTAAGEIFPLPNLNLYQVDAFLPSLTN			470	0.00750538	9	VDNKFTKEVPNASDQIFLLPNLNDYQVLAFIISLNN			470	0.00199948	1	VDNKFSKEVCDAIHEIHYLPNLNRDQKCAFIFSLFD			470	0.00194769	1	VDNKFNKEWHNATSEILALPNLNGDQGSAFVHSLVD							0.001	0.0026065		0.001	0.001		0.001	0.001		0.00294768	0.001
471	0.00119208	1	VDNKFNKEGGYAFGEITHLPNLNRIQGAAFIRSLFD			471	0.00750538	9	VDNKFTKEVPNASDQIFLLPNLNDYQVLSFLHSLRD			471	0.00199948	1	VDNKFSKEVCDAIHEIHYLPNLNRDQKCAFIFSPFD			471	0.00194769	1	VDNKFNKEWHNAITEICRLPNLNQVQGRAFIVSLAD							0.00338416	0.001		0.001	0.00308121		0.00299948	0.001		0.001	0.001
472	0.00119208	1	VDNKFNKEGGSAYSQIFILPNLNQGQVIAFVYSLCN			472	0.00750538	9	VDNKFTREVPNASDQIFLLPNLNDYQVLAFLHSLRD			472	0.00199948	1	VDNKFSKEVCDAIHEIHYLPNLNRDQKCAFIFSLFD			472	0.00194769	1	VDNKFNKEWHNAITEICRLPNLNQVQGRAFIVSLGN							0.00219208	0.001		0.00433572	0.00516242		0.001	0.001		0.001	0.001
473	0.00119208	1	VDNKFNKEGVYANFEICCLPNLNREQGGAFIVSLWD			473	0.00750538	9	VDNKFYKELCSAADEIVSLPNLNLSQERAFIISLNN			473	0.00199948	1	VDNKFSKEVCDAIHEIHYLPNLNRDQRHAFIFSLFD			473	0.00194769	1	VDNKFNKEWHNASSEICRLPNLNEGSGDRLRRQPGQ							0.001	0.0026065		0.001	0.001		0.001	0.001		0.001	0.001
474	0.00119208	1	VDNKFNKEGVSAYVEIDRLPNLNVSQQLAFISSLIN			474	0.00833931	10	VDNKFNKELFNAAFEIVSLPNLNLSQERAFINSLRN			474	0.00199948	1	VDNKFSKEVCDAIHEIHYLPNLNRYQKCAFIFSLFD			474	0.00194769	1	VDNKFNKEWHTATREILILPNLNRGQRLAFLPSLYN							0.00338416	0.001		0.00266786	0.001		0.001	0.001		0.001	0.001
475	0.00119208	1	VDNKFNKEGSSADVEIRDLPNLNEAQVYAFVTSLTN			475	0.00833931	10	VDNKFTKEVPNASDQIFLMPNLNDYQVLAFLHSLRD			475	0.00199948	1	VDNKFSKEVCDAIHEIHYLPNLNDAQRIAFIFSLFD			475	0.00194769	1	VDNKFNKEWHDAIDQIGCLPNLNVSQKRLRCQPVR							0.001	0.00421301		0.001	0.00308121		0.001	0.001		0.001	0.001
476	0.00119208	1	VDNKFNKEGCYASAQIPVLPNLNGNQLCAFIRSLLN			476	0.00833931	10	VDNKFTEEVPNASDQIFLLPNLNDYQVLAFLHSLRD			476	0.00199948	1	VDNKFSKEVCDAIHEIHYLPNLNANQVIAFVCSLFD			476	0.00194769	1	VDNKFNKEWHDASIQIVALPNLNGAQGSAFVCSLFD							0.00338416	0.00421301		0.00266786	0.001		0.001	0.00873784		0.00294768	0.00279459
477	0.00119208	1	VDNKFNKEGCYASHEILCLPNLNLYQMGAFIVSLHD			477	0.00917324	11	VDNKFNKELCSAADEIFVLPNLNDDQVLAFINSLRN			477	0.00199948	1	VDNKFSKEVCDAIHEIHFLPNLNVDQRHAFIFSLFD			477	0.00194769	1	VDNKFNKEWHDASCEIVGLPNLNRGQETAFLPSLVD							0.00219208	0.001		0.00600359	0.00724363		0.001	0.00293446		0.00294768	0.001
478	0.00119208	1	VDNKFNKEGCYASHEILCLPNLNVYQIVAFIRSLDN			478	0.0100072	12	VDNKFTKEVPNASDQIFLLPNLNDYQVLAFIHSLRD			478	0.00199948	1	VDNKFSKEVCDAIHEIHFLPNLNVDQRHAFIFSLFD			478	0.00194769	1	VDNKFNKEWHDAIIQIVDLPNLNAGQELAFVDSLND							0.00219208	0.00742601		0.00767145	0.00516242		0.001	0.001		0.00489537	0.001
479	0.00119208	1	VDNKFNKEGFDADSQILTLPNLNVTQVHAFVCSLCD			479	0.0100072	12	VDNKFTKEVPNSSDQIFLLPNLNDYQVLAFLHSLRD			479	0.00199948	1	VDNKFSKEVCDAIHEIHILPNLNRDQKCAFIFSLFD			479	0.00194769	1	VDNKFNKEWHDAISEIICLPNLNEGQQPAFVHSLSN							0.00219208	0.0026065		0.00266786	0.001		0.001	0.001		0.001	0.00279459
480	0.00119208	1	VDNKFNKEGFNAIYQIFNLPNLNGYQECAFLTSLCD			480	0.011675	14	VDNKFTKEVPNASDQIFLLPNLNDYQVLAFLHSLRD			480	0.00199948	1	VDNKFSKEVCDAIHEIHILPNLNDYQRVAFIFSLFD			480	0.00194769	1	VDNKFNKEWHDASIQICLLPNLNGFQGSAFIGSLRD							0.001	0.0026065		0.001	0.001		0.001	0.00293446		0.001	0.00279459
481	0.00119208	1	VDNKFNKEVNNATIEICDLPNLNRGQEVAFVYSLCD			481	0.011675	14	VDNKFTKEVPNASDQIFLLPNLNDYQVLAFLHSLSD			481	0.00199948	1	VDNKFSKEVCDAIHEIHILPNLNDYQRIAFIFSLFD			481	0.00194769	1	VDNKFNKEWHDASVQILSLPNLNDHPGGCLPFQPDQ							0.00338416	0.001		0.001	0.001		0.001	0.00293446		0.00294768	0.001
482	0.00119208	1	VDNKFNKEVNDAVVQIVVLPNLNHDQRSAFVVSLRD			482	0.011675	14	VDNKFTKEVPNASDQIFLLPNLNDYQVLAFLHSLRE			482	0.00199948	1	VDNKFSKEVCDAIHEIHILPNLNESQIIAFVNSLFD			482	0.00194769	1	VDNKFNKEWHAATLQIVCLPNLNRAQGGAFVYSLSD							0.001	0.0026065		0.00266786	0.001		0.00299948	0.001		0.001	0.00279459
483	0.00119208	1	VDNKFNKEVNDAVVQIVVLPNLNREQGGAFIVSLWD			483	0.011675	14	VDNKFTKEVPNASDQIFLLPNLNDYQVLAFLHSLRD			483	0.00199948	1	VDNKFSKEVCDAIHEIHFMPNLNDAQRIAFIFSLFD			483	0.00194769	1	VDNKFNKEWHAATYEIVHLPNLNPCQGRAFIGSLVN							0.00219208	0.00581951		0.0110072	0.0134873		0.001	0.001		0.001	0.001
484	0.00119208	1	VDNKFNKEVTNAYCEIYCLPNLNPFQGSAFVCSLSD			484	0.012509	15	VDNKFTKEVPNASDQIFLLQNLNDYQVLAFLHSLRD			484	0.00199948	1	VDNKFSKEVCDAIHEIHFLQNLNDAQRIAFIFSLFD			484	0.00194769	1	VDNKFNKEWHAAVVEICRLPELKRASGGRLR*QPVQ							0.00457624	0.0026065		0.001	0.001		0.001	0.00293446		0.001	0.00279459
485	0.00119208	1	VDNKFNKEVSNAANQIVPLPNLNGFQKFAFLDSLLD			485	0.012509	15	VDNKFTKEVPNASDQIFLLPNLNYYQVLAFLHSLRD			485	0.00199948	1	VDNKFSKEVCDAIHEIHFLPNLNTSQRLAFIFSLFD			485	0.00194769	1	VDNKFNKEWHAASCEIVNLPNLNPYQGCAFVFSLFN							0.00219208	0.001		0.001	0.001		0.001	0.001		0.001	0.00279459
486	0.00119208	1	VDNKFNKEVSDAIGQIIYLPNLNVRQITAFVRSLDD			486	0.012509	15	VDNKFYKELNDAAYQIATLPNLNEVQERAFVNSLFD			486	0.00199948	1	VDNKFSKEVCDAIHEIHFLPNLNPSQEYAFVYSLFD			486	0.00194769	1	VDNKFNKEWHAASIQISALPNLNQFQGDAFVGSLCD							0.001	0.0026065		0.00266786	0.001		0.001	0.001		0.00294768	0.001
487	0.00119208	1	VDNKFNKEVSSAFFQIAALPNLNLCQVNAFLYSLCN			487	0.0133429	16	VDNKFNKELFNAAFEIVSLPNLNDDQVLAFINSLRN			487	0.00199948	1	VDNKFSKEVCDAIHEIHFLPNLNPSQRLAFIFSLFD			487	0.00194769	1	VDNKFNKEWHAASIQISALPNLNQFQGVAFVDSLCD							0.00219208	0.001		0.001	0.001		0.001	0.001		0.00489537	0.001
488	0.00119208	1	VDNKFNKEVISATNEIVVLPNLNPPQGPAFICSLDD			488	0.0133429	16	VDNKFTKEVPNASDQIFLLPNLNEDQELAFVISLNN			488	0.00199948	1	VDNKFSKEVCDAIHEIHFLPNLNRDQKCAFIFSLFD			488	0.00194769	1	VDNKFNKEWHAATCEIFNLPNLNVVQGGAFVPSLND							0.0212654	0.0026065		0.001	0.001		0.001	0.001		0.00294768	0.00279459
489	0.00119208	1	VDNKFNKEVISATNEIVVLPNLNPPQGPAFVSSLDN			489	0.0150108	18	VDNKFNKELFNAAFEIVSLPNLNLSQVLAFLHSLRD			489	0.00199948	1	VDNKFSKEVCDAIHEIHFLPNLNRDQKCAFIFSLFD			489	0.00194769	1	VDNKFNKEWHAAIREICALPNLNRGQGSAFIHSLDD							0.00219208	0.001		0.00266786	0.001		0.001	0.001		0.001	0.001
490	0.00119208	1	VDNKFNKEVISATNEIVVLPNLNPPQGPAFVSSLDD			490	0.0158447	19	VDNKFTKEVPNASDQIFLLPNLNDYQVLAFINSLRD			490	0.00199948	1	VDNKFSKEVCDAIHEIHFLPNLNRDQKCAFIFRLFD			490	0.00194769	1	VDNKFNKEWHAAIREICALPNLNRGQGSAFIFSLSD							0.00219208	0.001		0.001	0.00516242		0.0269932	0.00486892		0.00294768	0.001
491	0.00119208	1	VDNKFNKEVISATNEIVVLPNLNPPQGPAFVRSLSD			491	0.0158447	19	VDNKFTKEVPNASDQIFLLPNLNDYHVLAFLHSLRD			491	0.00199948	1	VDNKFSKEVCDAIHEIHFLPNLNRDRKCAFIFSLFD			491	0.00194769	1	VDNKFNKEWHAAAFEICRLPNLNRSQEPAFVGSLYN							0.00219208	0.001		0.00933931	0.001		0.001	0.001		0.001	0.001
492	0.00119208	1	VDNKFNKEVISATNEIVVLPNLNPPQGPAFVYSLVD			492	0.0166786	20	VDNKFTKEVPNASDQIFLLPNLNDYQVLAFINSLRD			492	0.00199948	1	VDNKFSKEVCDAIHEIHFLPNLNRCQMGAFIVSLDD			492	0.00194769	1	VDNKFNKEWHAAAFEICGLPNLNGGQRDAFVPSLLD							0.00219208	0.001		0.001	0.001		0.00299948	0.001		0.001	0.001
493	0.00119208	1	VDNKFNKEVISATNEIVVLPNLNPDQVFAFLVSLNN			493	0.0166786	20	VDNKFTKEVPNASYQIFLLPNLNDYQVLAFLHSLRD			493	0.00199948	1	VDNKFSKEVCDAIHEIHFLPNLNLDQVIAFVISLFD			493	0.00194769	1	VDNKFNKEWHAAVCQIIHLPNLNAGQEYAFISSLAD							0.00219208	0.001		0.001	0.00308121		0.00299948	0.001		0.001	0.00279459
494	0.00119208	1	VDNKFNKEVISATNEIVVLPNLNREQGGAFIVSLWD			494	0.0166786	20	VDNKFSKEVVDATIEIHYLPNLNRDQKCAFIFSLFD			494	0.00199948	1	VDNKFSKEVCDAIHEIHFLPNLNDTQRIAFIFSLFD			494	0.00194769	1	VDNKFNKEWHAASCQIVNLPNLNLGQGTAFIPSLSD							0.00338416	0.001		0.001	0.001		0.001	0.00293446		0.001	0.001
495	0.00119208	1	VDNKFNKEVISATNEIVVLPNLNRDQRIAFLFSLCD			495	0.0175126	21	VDNKFTKEVPNASDQIFLLPNLNDYQVLAFLHSLNN			495	0.00199948	1	VDNKFSKEVCDAIHEIHFLPNLNDDQRIAFIFSLFD			495	0.00194769	1	VDNKFNKEWHAASIEIASLPNLNDFQGSAFIYSLTD							0.00219208	0.001		0.001	0.001		0.001	0.001		0.001	0.00279459
496	0.00119208	1	VDNKFNKEVISATNEIVVLPNLNARQKPAFLVSLCD			496	0.0175126	21	VDNKFTKEVPNASDQIFLLPNLNDYQVLAFLHSLLD			496	0.00199948	1	VDNKFSKEVCDAIHEIHFLPNLNDAQRLAFIFSLFD			496	0.00194769	1	VDNKFNKEWHAASAEIVRLPNLNGSQEPAFVNSLID							0.001	0.0026065		0.001	0.001		0.001	0.00293446		0.00294768	0.001
497	0.00119208	1	VDNKFNKEVISATNEIVVLPNLNVYQIVAFIRSLDN			497	0.0191804	23	VDNKFTKEVPNASDQIFLLPNLNDYQVLAFLHSLRD			497	0.00199948	1	VDNKFSKEVCDAIHEIHFLPNLNDAQRIAFIFSLFD			497	0.00194769	1	VDNKFNKEWHYAIREIPCLPNLNGAQRGAFVYSLFN							0.00219208	0.001		0.503026	0.398511		0.00299948	0.001		0.001	0.00279459
498	0.00119208	1	VDNKFNKEVISATNEIVVLPNLDPPQGPAFVSSLID			498	0.0200143	24	VDNKFTKEVPNASDQIFLLPNLNDDQVLAFLHSLRD			498	0.00199948	1	VDNKFSKEVCDAIHEIHFLPNLNDAQRIAIIFSLFD			498	0.00194769	1	VDNKFNKEWHYATHQILHLPNLNGRQGDAFVGSLDD							0.00219208	0.001		0.00266786	0.001		0.001	0.001		0.001	0.001
499	0.00119208	1	VDNKFNKEVISATNEIVFLPNLNPPQGPAFVSSLID			499	0.0216822	26	VDNKFTKELFNAAFEIVSLPNLNLSQERAFIISLNN			499	0.00199948	1	VDNKFSKEVCDAIHEIHFLPNLNDAQRIALIFSLFD			499	0.00194769	1	VDNKFNKEWHYAACQILNLPNLNPPQRTAFIYSLDD							0.001	0.00421301		0.001	0.00308121		0.001	0.00293446		0.00294768	0.001
500	0.00119208	1	VDNKFNKEVLAASPQITALPNLNLVQIYAFLHSLLD			500	0.0233501	28	VDNKFTKEVPNASDQIFLLPNLNDDQVLAFINSLRD			500	0.00199948	1	VDNKFSKEVCDAIHEIHFLPNLNDAQRIASIFSLFD			500	0.00194769	1	VDNKFNKEWHYAACQILNLPNLNRDQGRAFIGSLND							0.00219208	0.0026065		0.001	0.001		0.001	0.00680338		0.001	0.001
501	0.00119208	1	VDNKFNKEVADAIVEIALLPNLNVIQRTRLRMQPV*			501	0.024184	29	VDNKFYKELFNAAFEIVSLPNLNLSQERAFIISLNN			501	0.00199948	1	VDNKFSKEVCDAIHEIHFLPNLNDAQRIAFIISLFD			501	0.00194769	1	VDNKFNKEWHYAAYQILLLPNLNQYQGDAFVYSLDD							0.00219208	0.001		0.001	0.00724363		0.00299948	0.001		0.001	0.001
502	0.00119208	1	VDNKFNKEVGDADFEIGSLPNLNVDQGVAFLSSLRD			502	0.0258519	31	VDNKFTKEVPNASDQIFLLPNLNDDQVLAFLHSLRD			502	0.00199948	1	VDNKFSKEVCDAIHEIHFLPNLNDAQRIAFISSLFD			502	0.00194769	1	VDNKFNKEWHYAVSQILILPNLNACQEGAFVGSLNN							0.001	0.0026065		0.001	0.001		0.001	0.001		0.001	0.00279459
503	0.00119208	1	VDNKFNKEVYNATIQIVSLPNLNDLQGGAFVDSLND			503	0.0275197	33	VDNKFYKEVPNASDQIFLLPNLNDYQVLAFLHSLRD			503	0.00199948	1	VDNKFSKEVCDAIHEIHFLPNLNDAQRIAFILSLFD			503	0.00194769	1	VDNKFNKEWHYASYEILSLPNLNAYQEFAFVDSLSN							0.001	0.0026065		0.00266786	0.001		0.001	0.00293446		0.001	0.001
504	0.00119208	1	VDNKFNKEVSDADDEIDYLPNLNVTQVGAFIISLSD			504	0.0308554	37	VDNKFNKELHYAVHEIISLPNLNEDQELAFVISLNN			504	0.00199948	1	VDNKFSKEVCDAIHEIHFLPNLNDAQRIAFIFSMFD			504	0.00194769	1	VDNKFNKEWHSAIIEITRLPNLNGHQESAFLCSLDD							0.00219208	0.001		0.001	0.00308121		0.001	0.001		0.001	0.001
505	0.00119208	1	VDNKFNKEVCDAYAQIGNLPNLNDDQILAFLASLIN			505	0.0308554	37	VDNKFYKELCSAADEIFLLPNLNDYQVLAFLHSLRD			505	0.00199948	1	VDNKFSKEVCDAIHEIHFLPNLNDAQRIAFIFSLFD			505	0.00194769	1	VDNKFNKEWHSATTQILSLPNLNGRQIDAFVDSLAD							0.001	0.0026065		0.001	0.001		0.00299948	0.001		0.001	0.001
506	0.00119208	1	VDNKFNKEVCDAYAQIGNLPNLNDAQRIAFIFSLFD			506	0.0341912	41	VDNKFYKELCSAADEIFVLPNLNLSQERAFIISLNN			506	0.00199948	1	VDNKFSKEVCDAIHEIHFLPNLNDAQRIAFIFSLLN			506	0.00194769	1	VDNKFNKEWHSATCEICSLPNLNQRQGHAFVDSLPD							0.00219208	0.001		0.00266786	0.001		0.001	0.001		0.001	0.001
507	0.00119208	1	VDNKFNKEVCYANNQIFSLPNLNVYQMHAFIGSLGD			507	0.0375269	45	VDNKFNKELFNAAFEIVSLPNLNLSQERAFLHSLRD			507	0.00199948	1	VDNKFSKEVCDAIHEIHFLPNLNDAQRIAFIFSLAD			507	0.00194769	1	VDNKFNKEWHSATCEICSLPNLNQRQGHAFVVSLTD							0.00219208	0.001		0.001	0.00308121		0.001	0.00293446		0.00294768	0.001
508	0.00119208	1	VDNKFNKEVFNASIEIPFLPNLNLGQKCAFVDSLVD			508	0.0492019	59	VDNKFNKELFNAAFEIVSLPNLNLSQERAFIISLRD			508	0.00199948	1	VDNKFSKEVCDAIHEIHFLPNLNDAQRIAFIFSLSD			508	0.00194769	1	VDNKFNKEWHSAVHQILVLPNLNGDQQSAFVGSLDN							0.00338416	0.001		0.00933931	0.00932484		0.001	0.001		0.001	0.001
509	0.00119208	1	VDNKFNKEVFSASFEIGSLPNLNPPQGPAFVSSLDN			509	0.0508698	61	VDNKFYKELCSAADEIFVLPNLNDDQVLAFLHSLRD			509	0.00199948	1	VDNKFSKEVCDAIHEIHFLPNLNDAQRIAFIFSLCD			509	0.00194769	1	VDNKFNKEWRNATAQILVLPNLNVAQESAFVGSLDN							0.001	0.00421301		0.001	0.00308121		0.001	0.00486892		0.001	0.001
510	0.00119208	1	VDNKFNKEVFDADGEIHGLPNLNVRQLIAFVRSLGD			510	0.085061	102	VDNKFTKEVPNASDQIFLLPNLNDYQVLAFINSLRN			510	0.00199948	1	VDNKFSKEVCDAIHEIHFLPNLNDAQRIAFIFSVFD			510	0.00194769	1	VDNKFNKEWRNAVDEIGNLPNLNECQGAAFIGSLDD							0.00219208	0.001		0.001	0.001		0.001	0.00293446		0.001	0.00279459
511	0.00119208	1	VDNKFNKEWNNASTQILTLPNLNEAQQGAFVYSLCN			511	0.0892306	107	VDNKFTKEVPNASDQIFLLPNLNDYQVLAFINSLRN			511	0.00199948	1	VDNKFSKEVCDAIHEIHFLPNLNDAQRIAFIFSLFD			511	0.00194769	1	VDNKFNKEWRNASVQILALPKLKPDPGGCLHSQPG*							0.0117287	0.00742601		0.00933931	0.0238933		0.001	0.001		0.001	0.00279459
512	0.00119208	1	VDNKFNKEWNTATIQICCLPNLNQFQERAFIGSLGN			512	0.10174	122	VDNKFYKELCSAADEIFVLPNLNDDQVLAFLHSLRD			512	0.00199948	1	VDNKFSKEVCDAIHEIHFLPNLNDAQRIAFIFSLFD			512	0.00194769	1	VDNKFNKEWRTAVIEISRLPNLNRFQGGAFVGSLYN							0.001	0.0026065		0.00266786	0.001		0.001	0.001		0.00294768	0.001
513	0.00119208	1	VDNKFNKEWNDAVSEIVNLPNLNLGQRVAFVISLVD			513	0.129259	155	VDNKFNKEVCDAYAQIGNLPNLNVYQIVAFIRSLDN			513	0.00199948	1	VDNKFSKEVCDAIHEIHFLPNLNDAQRIAFIFSLFD			513	0.00194769	1	VDNKFNKEWRTAVYEICRLPNLNDAQGVAFVCSLFD							0.00219208	0.001		0.0760538	0.107142		0.001	0.001		0.001	0.00458918
514	0.00119208	1	VDNKFNKEWTYAVDEILALPNLNVGQGIAFISSLPD			514	0.16762	201	VDNKFYKELCSAADEIFVLPNLNDDQVLAFINSLRD			514	0.00199948	1	VDNKFSKEVCDAIHEIHFLPNLNDAQRIAFIFSLFD			514	0.00194769	1	VDNKFNKEWRTAVCQILSLPNLNGCQGSAFIRSLSN							0.001	0.0026065		0.001	0.001		0.001	0.001		0.001	0.00997296
515	0.00119208	1	VDNKFNKEWSTAALEILYLPNLNEVQKPAFVSSLCD			515	0.175959	211	VDNKFNKELFNAAFEIVSLPNLNDYQVLAFLHSLRD			515	0.00199948	1	VDNKFSKEVCDAIHEIHFLPNLNDAQRIAFVVSLFD			515	0.00194769	1	VDNKFNKEWRTAVHEILRLPNLNGCQGGAFISSLNN							0.00338416	0.001		0.001	0.001		0.001	0.00293446		0.001	0.00458918
516	0.00119208	1	VDNKFNKEWSSAIHQICNLPNLNLNQGGAFVSILVN			516	0.22266	267	VDNKFNKEVPNASDQIFLLPNLNDYQVLAFLHSLRD			516	0.00199948	1	VDNKFSKEVCDAIHEIHFLPNLNDAQRIAFVFSLFD			516	0.00194769	1	VDNKFNKEWRDASNEILSLPNLNRGQSGRLRPQPE*							0.001	0.0026065		0.001	0.001		0.001	0.00293446		0.001	0.001
517	0.00119208	1	VDNKFNKEWITADGQIHILPNLNAIQVGAFIYSLDN			517	0.251013	301	VDNKFTKEVPNASDQIFLLPNLNDDQVLAFINSLRN			517	0.00199948	1	VDNKFSKEVCDAIHEIHFLPNLNDAQRIAFVISLFD			517	0.00194769	1	VDNKFNKEWRDATVQICSLPNLNRGQEPAFVGSLID							0.001	0.0026065		0.001	0.001		0.00299948	0.001		0.00294768	0.001
518	0.00119208	1	VDNKFNKEWHDAYLEICDLPNLNGLQRDAFIGSLDN			518	0.255183	306	VDNKFTKEVPNASDQIFLLPNLNDYQVLAFLHSLRN			518	0.00199948	1	VDNKFSKEVCDAIHEIHFLPNLNDAQRIAFVVSLFN			518	0.00194769	1	VDNKFNKEWRDAVSEICGLPNLNGSQMPAFVGSLHD							0.00219208	0.001		0.001	0.00308121		0.001	0.00293446		0.001	0.001
519	0.00119208	1	VDNKFNKEWRTADREILGLPNLNPDQKYAFIDSLVD			519	0.276865	332	VDNKFTKEVPNASDQIFLLPNLNLSQERAFIISLNN			519	0.00199948	1	VDNKFSKEVCDAIHEIHFLPNLNDAQRIAFIFSLFD			519	0.00194769	1	VDNKFNKEWRDASAQIVRLPNLNVCQECAFVISLGN							0.0224574	0.0347366		0.001	0.001		0.001	0.001		0.001	0.001
520	0.00119208	1	VDNKFNKEWRTADREILGLPNLNRPQESAFVNSLTN			520	0.319396	383	VDNKFYKELCSAADEIFVLPNLNDYQVLAFLHSLRD			520	0.00199948	1	VDNKFSKEVCDAIHEIHFLPNLNDAQRIAFIFSLFD			520	0.00194769	1	VDNKFNKEWRDASYEIVNLPNLNVSQGIAFLSSLPD							0.00576832	0.00421301		0.001	0.001		0.00299948	0.001		0.001	0.001
521	0.00119208	1	VDNKFNKEWRTADREILGLPNLNVYQIVAFIRSLDN			521	1.38349	1659	VDNKFYKELCSAADEIFVLPNLNDDQVLAFINSLRN			521	0.00199948	1	VDNKFSKEVCDAIHEIHFLPNLNDAQRIGFIISLFD			521	0.00194769	1	VDNKFNKEWRAATIEILYLPNLNVCQGGAFIASLGD							0.00219208	0.001		0.00266786	0.001		0.001	0.001		0.001	0.001
522	0.00119208	1	VDNKFNKEWRMHMTKFAACRT*TTIRWMPSFAAWTM			522	2.80117	3359	VDNKFNKELFNAAFEIVSLPNLNLSQERAFIISLNN			522	0.00199948	1	VDNKFSKEVCDAIHEIHFLPNLNDAQRIAFIFSLFD			522	0.00194769	1	VDNKFNKEWRAAARQIVGLPNLNGAQGTAFLASLTD							0.00219208	0.001		0.00266786	0.001		0.001	0.001		0.001	0.00279459
523	0.00119208	1	VDNKFNKEWANAVYQISLLPNLNVPQQTAFISSLGN			523	42.2828	50703	VDNKFTKEVPNASDQIFLLPNLNDYQVLAFLHSLRD			523	0.00199948	1	VDNKFSKEVCDAIHEIHFLPNLNDAQRVAFIFSLFD			523	0.00194769	1	VDNKFNKEWRAAVLQICTLPNLNRSQELAFVPSLFD							0.001	0.0026065		0.001	0.00516242		0.00299948	0.001		0.001	0.001
524	0.00119208	1	VDNKFNKEWGTATSQIYHLPNLNAFQEFAFIFSLTN			524	0.000833931	1	VDNKFNKELFNAAFEIVSLPNLNLSQERAFIISLNN			524	0.00199948	1	VDNKFSKEVCDAIHEIHFLPNLNDAQSIAFIFSLFD			524	0.00194769	1	VDNKFNKEWRAASYEICSLPNLNAPQRPAFVRSLRN							0.001	0.0026065		0.00266786	0.001		0.0149964	0.00486892		0.001	0.001
525	0.00119208	1	VDNKFNKEWGTATSQIYRLPNLNLFQMIAFVISLTD			525	0.000833931	1	VDNKFKKELFNAAFEIVSLPNLNLSQERAFIISLNN			525	0.00199948	1	VDNKFSKEVCDAIHEIHFLPNLNDALRIAFIFSLFD			525	0.00194769	1	VDNKFNKEWRAASVQIVGLPNLNHSQGGAFVSSLSN							0.00219208	0.001		0.00266786	0.001		0.0309922	0.00293446		0.00294768	0.001
526	0.00119208	1	VDNKFNKEWGTATSQIYRLPNLNDHQRDAFVNSLDN			526	0.000833931	1	VDNKFKKELFNAAFEIVSLPNLNDYQVLAFLHSLRD			526	0.00199948	1	VDNKFSKEVCDAIHEIHFLPNLNDAERIAFIFSLFD			526	0.00194769	1	VDNKFNKEWRAATRQITLLPNLNVIQGDAFLISLGD							0.00219208	0.001		0.001	0.001		0.00299948	0.001		0.00294768	0.001
527	0.00119208	1	VDNKFNKEWGTATSQIYRLPNLNDGQKFAFISSLSD			527	0.000833931	1	VDNKFNKEPRAARLEITVLPNLNREQGGAFIVSLWD			527	0.00199948	1	VDNKFSKEVCDAIHEIHFLPNLNDYQKCAFIFSLFD			527	0.00194769	1	VDNKFNKEWRAAIRQISSLPNLNVSQENAFVISLGD							0.00219208	0.001		0.00767145	0.00724363		0.001	0.001		0.001	0.001
528	0.00119208	1	VDNKFNKEWGTATSQIYRLPNLNEAQVIAFVLSLVD			528	0.000833931	1	VDNKFNKEVPNASDQIFLLPNLNDYQVLAFLHSLRD			528	0.00199948	1	VDNKFSKEVCDAIHEIHFLPNLNDYQRLAFIFSLFD			528	0.00194769	1	VDNKFNKEWRAAIRQISSLPNLNGGQKDAFVVSLSN							0.001	0.0026065		0.00433572	0.001		0.001	0.001		0.00294768	0.001
529	0.00119208	1	VDNKFNKEWGTATSQIYRLPNLNEVQGSAFICSLCN			529	0.000833931	1	VDNKFNKEVPNASDQIFLLPNLNDYQVLAFIISLRD			529	0.00199948	1	VDNKFSKEVCDAIHEIHFLPNLNENQVIAFVCSLFD			529	0.00194769	1	VDNKFNKEWRAAIRQISSLPNLNGGQKDAFVGSLPD							0.00219208	0.001		0.001	0.001		0.001	0.00293446		0.001	0.001
530	0.00119208	1	VDNKFNKEWGTATSQIYRLPNLNEFQKAAFVGSLGN			530	0.000833931	1	VDNKFNKEVPNASDQIFLLPNLNDYQVLAFLHSMRD			530	0.00199948	1	VDNKFSKEVCDAIHEIHFLPNLNESQVSAFVVSLFD			530	0.00194769	1	VDNKFNKEWRAAAGQILSLPNLNVNQGSAFIGSLCN							0.00219208	0.001		0.00266786	0.001		0.001	0.00293446		0.00489537	0.00279459
531	0.00119208	1	VDNKFNKEWGTATSQIYRLPNLNAHQVIAFLGSLTN			531	0.000833931	1	VDNKFNKEVPNASDQIFLLPNLNDYQVLAFLHSLRD			531	0.00199948	1	VDNKFSKEVCDAIHEIHFLPNLNESQVVAFVVSLFD			531	0.00194769	1	VDNKFNKEWRAAVREIVNLPNLNGVQKCAFVPSLCD							0.00219208	0.001		0.001	0.00308121		0.00699844	0.00486892		0.00294768	0.001
532	0.00119208	1	VDNKFNKEWGTATSQIYRLPNLNARQKPAFLVSLDN			532	0.000833931	1	VDNKFNKEVPNASDQIFLLPNLNDYQVLAFLHSLLD			532	0.00199948	1	VDNKFSKEVCDAIHEIHFLPNLNERQVVAFICSLFD			532	0.00194769	1	VDNKFNKEWRAAVIQICRLPNLNQLQGGAFIDSLVD							0.00219208	0.001		0.00266786	0.001		0.001	0.001		0.00294768	0.001
533	0.00119208	1	VDNKFNKEWGTATSQIYRLPNLNARQKPAFLVSLCD			533	0.000833931	1	VDNKFNKEVPNASDQIFLLPNLNDYHVLAFLHSLRD			533	0.00199948	1	VDNKFSKEVCDAIHEIHFLPNLNEGQVVAFVVSLFD			533	0.00194769	1	VDNKFNKEWRAASDQILDLPNLNGGQKRAFIGSLGN							0.001	0.0026065		0.001	0.00308121		0.001	0.001		0.001	0.00458918
534	0.00119208	1	VDNKFNKEWGTATSQIYRLPNLNACQLGAFLSSLSN			534	0.000833931	1	VDNKFNKEVPNASDQIFLLPNLNDYQVLAFLHSLRD			534	0.00199948	1	VDNKFSKEVCDAIHEIHFLPNLNAIQVPAFLTSLSN			534	0.00194769	1	VDNKFNKEWRAASIQILALPNLNVDQGDAFVRSLSD							0.00219208	0.001		0.00266786	0.00932484		0.001	0.001		0.001	0.001
535	0.00119208	1	VDNKFNKEWGTATSQIYRLPNLNAFQELAFIFSLTN			535	0.000833931	1	VDNKFNKEVPNASGQIFLLPNLNDYQVLAFLHSLRD			535	0.00199948	1	VDNKFSKEVCDAIHEIHFLPNLNANQVIAFVCSLFD			535	0.00194769	1	VDNKFNKEWRAASDEILGLPNLNQHQGSAFVLSLCD							0.00219208	0.001		0.001	0.001		0.001	0.001		0.001	0.001
536	0.00119208	1	VDNKFNKEWGTATSQIYRLPNLNAFQEFAFIGSLLN			536	0.000833931	1	VDNKFNKEVDYAYAQIHCLPNLNHCQVSAFVLSLCN			536	0.00199948	1	VDNKFSKEVCDAIHEIHFLPNLNANQVIAFVCSLFD			536	0.00194769	1	VDNKFNKEWRYAVGEILRLPNLNAYRRAAFVTSLGN							0.00338416	0.001		0.001	0.001		0.00299948	0.001		0.001	0.001
537	0.00119208	1	VDNKFNKEWGTATSQIYRLPNLNAFQEFAFIFSLTD			537	0.000833931	1	VDNKFNKEVCDAYAQIGNLPNLNRDQKCAFIFSLFD			537	0.00199948	1	VDNKFSKEVCDAIHEIHFLPNLNAVQVNAFVLSLFD			537	0.00194769	1	VDNKFNKEWRYASAQICRLPNLNQCQEGAFVVSLCN							0.00219208	0.001		0.001	0.001		0.001	0.001		0.001	0.001
538	0.00119208	1	VDNKFNKEWGTATSQIYRLPNLNAFQEFAFIFSLSN			538	0.000833931	1	VDNKFNKEVFAASGQIGALPNLNAGQGGAFIVSLCD			538	0.00199948	1	VDNKFSKEVCDAIHEIHFLPNLNVIQGCAFINSLFN			538	0.00194769	1	VDNKFNKEWRYASGQIVNLPNLNVVQESAFVDSLLN							0.00815248	0.001		0.001	0.001		0.001	0.001		0.00489537	0.001
539	0.00119208	1	VDNKFNKEWGTATSQIYRLPNLNAFQEFAFIFSLIN			539	0.000833931	1	VDNKFNKEQFNAADEIFVLPNLNDDQVLAFINSLRD			539	0.00199948	1	VDNKFSKEVCDAIHEIHFLPNLNVDQRHAFIFSLFD			539	0.00194769	1	VDNKFNKEWRYASAQICCLPNLNEVQGGAFVISLSD							0.00219208	0.001		0.00266786	0.001		0.001	0.001		0.00294768	0.001
540	0.00119208	1	VDNKFNKEWGTATSQIYRLPNLNAFQEFAFIFSLSN			540	0.000833931	1	VDNKFNKEWTNAIAQICYLPNLNVYQKPAFVNSLLD			540	0.00199948	1	VDNKFSKEVCDAIHEIRFLPNLNRDQKCAFIFSLFD			540	0.00194769	1	VDNKFNKEWRYASSQILRLPNLNGPQGFAFVPSLCD							0.00219208	0.001		0.00767145	0.00516242		0.001	0.00293446		0.001	0.001
541	0.00119208	1	VDNKFNKEWGTATSQIYRLPNLNAFQEFAFLFSLCD			541	0.000833931	1	VDNKFNKEWCNAIAQILSLPNLNGRQMVAFLRSLGN			541	0.00199948	1	VDNKFSKEVCDAIHEIYFLPNLNDAQRIAFIFSLFD			541	0.00194769	1	VDNKFNKEWRYASHQIASLPNLNACQQLAFVPSLPN							0.00219208	0.001		0.0110072	0.011406		0.001	0.00293446		0.001	0.001
542	0.00119208	1	VDNKFNKEWGTATSQIYRLPNLNGVQIAAFLRSLVN			542	0.000833931	1	VDNKFNKELHYADHEIISLPNLNEDQELAFVISLNN			542	0.00199948	1	VDNKFSKEVCDAIHEIFALPNLNEVQVVAFIFSLFD			542	0.00194769	1	VDNKFNKEWRSATTQILSLPNLNDCQKLPSSSACLM							0.001	0.00421301		0.00266786	0.001		0.001	0.001		0.001	0.001
543	0.00119208	1	VDNKFNKEWGTATSQIYRLPNLNGVQRDAFIASLRD			543	0.000833931	1	VDNKFNKELHYAVHEIISLPNLNLSQERAFIISLNN			543	0.00199948	1	VDNKFSKEVCDAIHDIHFLPNLNDAQRIAFIFSLFD			543	0.00194769	1	VDNKFNKEWRSAAIQILCLPNLNQCQGNAFVGSLDN							0.00338416	0.001		0.001	0.001		0.001	0.00293446		0.001	0.001
544	0.00119208	1	VDNKFNKEWGTATSRIYRLPNLNAFQEFAFIFSLTN			544	0.000833931	1	VDNKFNKELHYAVHEIISLPNLNEDQELAFINSLRN			544	0.00199948	1	VDNKFSKEVCDAIHVIHFLPNLNDAQRIAFIFSLFD			544	0.00194769	1	VDNKFNKEWRSASCQICFLELKRVSANRLHPQPVR							0.00219208	0.001		0.001	0.00308121		0.001	0.00293446		0.001	0.001
545	0.00119208	1	VDNKFNKEWGTATSEISYLPNLNQSQKYAFIFSLID			545	0.000833931	1	VDNKFNKELHTAALQIAVLPNLNPSQRHAFVLSLNN			545	0.00199948	1	VDNKFSKEVCDAIYEIFGLPNLNERQVVAFICSLFD			545	0.00194769	1	VDNKFNKEWRSASCQICFLELKRGSGKRLHRQPE*							0.001	0.00421301		0.001	0.001		0.001	0.001		0.001	0.001
546	0.00119208	1	VDNKFNKEWGTATFQIYRLPNLNAFQEFAFIFSLTN			546	0.000833931	1	VDNKFNKELCSAADEIFVLPNLNDDQVLAFINSLRD			546	0.00199948	1	VDNKFSKEVCDAIFEIFVLPNLNESQVSAFVVSLFD			546	0.00194769	1	VDNKFNKEWRSASREILALPNLNERQRPAFISSLRD							0.00457624	0.00903252		0.00266786	0.001		0.00299948	0.0106723		0.001	0.00458918
547	0.00119208	1	VDNKFNKEWGAAVHEIIRLPNLNGSQGGAFLDSLVN			547	0.000833931	1	VDNKFNKELCSAADEIFVLPNLNDDQVLAFLHSLRD			547	0.00199948	1	VDNKFSKEVCDAIFEIFSLPNLNANQVIAFVCSLFD			547	0.00194769	1	VDNKFNKEWRNAVDQILGLPNLNQHQGGAFLCSLGD							0.00457624	0.001		0.00266786	0.001		0.00299948	0.001		0.001	0.001
548	0.00119208	1	VDNKFNKEWYNAALQITPLPNLNPPQGPAFVSSLID			548	0.000833931	1	VDNKFNKELLNAAFEIVSLPNLNLSQERAFIISLNN			548	0.00199948	1	VDNKFSKEVCDAYAQIGNLPNLNRDQKCAFIFSLFD			548	0.00194769	1	VDNKFNKEWRNASHQILNLPNLNDGQGVAFVGSLVD							0.001	0.00421301		0.0343572	0.0218121		0.00299948	0.0164757		0.001	0.001
549	0.00119208	1	VDNKFNKEWCNAFPEIHALPNLNRSQRRAFVISLTD			549	0.000833931	1	VDNKFNKELFNAAFEIVSLPNLNLSQERAFIISLNN			549	0.00199948	1	VDNKFSKEVCDAYAQIGNLPNLNDAQRIAFIFSLFD			549	0.00194769	1	VDNKFNKEWRNASHQILVLPNLNLGQGAAFVGSLDD							0.00815248	0.00581951		0.001	0.00516242		0.00299948	0.001		0.001	0.001
550	0.00119208	1	VDNKFNKEWCTAFYEISSLPNLNHVQRSAFVTSLGD			550	0.000833931	1	VDNKFNKELFNADFEIVSLPNLNLSQERAFIISLNN			550	0.00199948	1	VDNKFSKEVCDSIHEIHFLPNLNDAQRIAFIFSLFD			550	0.00194769	1	VDNKFNKEWRNASSQITRLPNLNVAQEYAFVYSLYD							0.001	0.0026065		0.001	0.001		0.001	0.00293446		0.001	0.001
551	0.00119208	1	VDNKFNKEWCAAVIQIIHLPNLNRHQIIAFIAQPVQ			551	0.000833931	1	VDNKFNKELFNAALEIVSLPNLNLSQERAFIISLNN			551	0.00199948	1	VDNKFSKEVCDAIYEIHILPNLNVFQRLAFIFSLFD			551	0.00194769	1	VDNKFNKEWRNASSQICNLPNLNLYQGSAFVRSLVD							0.00934456	0.00581951		0.001	0.001		0.001	0.001		0.001	0.001
552	0.00119208	1	VDNKFNKEWCDAYTQIHPLPNLNRIQMAAFVSSLID			552	0.000833931	1	VDNKFNKELFNAADEIFVLPNLNDDQVLAFLHSLRD			552	0.00199948	1	VDNKFSKEVCSAFAQIFGLPNLNVRQVRAFVCSLVD			552	0.00194769	1	VDNKFNKEWRNAVSQILSLPNLNGVQQPAFLPSLGN							0.001	0.0026065		0.0143429	0.0259745		0.001	0.001		0.001	0.00279459
553	0.00119208	1	VDNKFNKEWFAASPEIFLLPNLNENQQDAFILSLHD			553	0.000833931	1	VDNKFNKELFNAAFEIVSLPNLNLSQERAFIISLNN			553	0.00199948	1	VDNKFSKEVFTAFDQIPTLPNLNRDQKCAFIFSLFD			553	0.00194769	1	VDNKFNKEWRNAVAQIFRLPNLNGLQGRAFVCSLGD							0.00219208	0.001		0.00266786	0.001		0.00299948	0.001		0.00294768	0.001
554	0.00119208	1	VDNKFNKELSDAVHQIYGLPNLNGSQQDAFLLSLVD			554	0.000833931	1	VDNKFNKELFNAAFEIVSLPNLNLSQERDFIISLNN			554	0.00199948	1	VDNKFSKEVFDAIHEIHFLPNLNPSQRLAFIFSLFD			554	0.00194769	1	VDNKFNKEWRNASSEILNLPNLNQLQGVAFVDSLLN							0.00934456	0.0122455		0.001	0.00308121		0.001	0.00680338		0.001	0.001
555	0.00119208	1	VDNKFNKELIYAVPQIIILPNLNEPQVYAFISSLVD			555	0.000833931	1	VDNKFNKELFNAAFEIVSLPNLNLSQERAFIIILNN			555	0.00199948	1	VDNKFSKEVFDAIHEIHFLPNLNRDQKCAFIFSLFD			555	0.00194769	1	VDNKFNKEWRNASSEILNLPNLNVCHLRCQPGR							0.001	0.0026065		0.001	0.00308121		0.00299948	0.001		0.001	0.001
556	0.00119208	1	VDNKFNKELHDAYCQIRLLPNLNQSQRVAFLNSLSD			556	0.000833931	1	VDNKFNKELFNAAFEIVSLPNLNLSQERAFIISLNN			556	0.00199948	1	VDNKFSKEVFDAIHEIHFLPNLNDAQMIAFIFSLFD			556	0.00194769	1	VDNKFNKEWRNASYQIACLPNLNATQGFAFISSLDD							0.00219208	0.001		0.001	0.001		0.00299948	0.001		0.001	0.001
557	0.00119208	1	VDNKFNKELHYAFCEINILPNLNREQGGAFIVSPWD			557	0.000833931	1	VDNKFNKELFNAAFEIVSLPNLNLSQERAFIVSLNN			557	0.00199948	1	VDNKFSKEVFDATIEIHYLPNLNREQGGAFIVSLWD			557	0.00194769	1	VDNKFNKEWRNFVCSLCD							0.001	0.0026065		0.00433572	0.00308121		0.00299948	0.001		0.001	0.001
558	0.00119208	1	VDNKFNKELHYAFGQIDRLPNLNLDQISAFLRSLND			558	0.000833931	1	VDNKFNKELFNAAFEIVSLPNLNLSQERAFLHSLRN			558	0.00199948	1	VDNKFSKEVFDAIFEIFCLPNLNDAQRIAFIFSLFD			558	0.00194769	1	VDNKFNKEWRTATSQILTLPNLNPRQEAAFIRSLRD							0.00219208	0.001		0.001	0.00308121		0.001	0.001		0.001	0.001
559	0.00119208	1	VDNKFNKELRDATGEISCLPNLNVCQECAFVNSLRN			559	0.000833931	1	VDNKFNKELFNAAFEIVSLPNLNLSQVLAFLHSLSD			559	0.00199948	1	VDNKFSKEVVDATIEIHYLPNLNDAQRIAFIFSLFD			559	0.00194769	1	VDNKFNKEWRTATRQISILPNLNGCQEFAFVDSLGD							0.00219208	0.001		0.001	0.001		0.00299948	0.001		0.001	0.00458918
560	0.00119208	1	VDNKFNKELLSAYCEIISLPNLNVGQGVAFVPSLSN			560	0.000833931	1	VDNKFNKELFNAAFEIVSLPNLNLSQQRAFIISLNN			560	0.00199948	1	VDNKFSKEVCDAIHEIHFLPNLNDAQRIAFIFSLFD			560	0.00194769	1	VDNKFNKEWRTATAQILLLPNLNHSQEYAFICSLSD							0.00219208	0.001		0.33624	0.227852		0.001	0.00293446		0.001	0.001
561	0.00119208	1	VDNKFNKELDYAYREIGFLPNLNVCQLHAFVVSLID			561	0.000833931	1	VDNKFNKELFNAAFEIVSLPNLNLSEERAFIISLNN			561	0.00199948	1	VDNKFSKEWNAATIEIIVLPNLNRSQGDAFVDSLVD			561	0.00194769	1	VDNKFNKEWRTASDQILGLPNLNGCQVCAFVNSLAD							0.00219208	0.001		0.001	0.001		0.001	0.001		0.00294768	0.001
562	0.00119208	1	VDNKFNKELDSAICQIYILPNLNARQGSAFVYSLTD			562	0.000833931	1	VDNKFNKELFNAAFEIVSLPNLNLIQERAFIISLNN			562	0.00199948	1	VDNKFSKEWSTAIGQISDLPNLNLIQLIAFLTSLYD			562	0.00194769	1	VDNKFNKEWRTAIAEISSLPNLNVIQGGAFVDSLDN							0.001	0.0026065		0.001	0.001		0.001	0.001		0.001	0.00279459
563	0.00119208	1	VDNKFNKELAYANIEIGFLPNLNGCQLYAFLRSLSD			563	0.000833931	1	VDNKFNKELFNAAFEIVSLPNLNDDQVLAFINSLRD			563	0.00199948	1	VDNKFSKEWSSAVSQILNLPNLNGGQQAAFVFSLDD			563	0.00194769	1	VDNKFNKEWRTAIAEISSLPNLNVNQGSAFIHSLDD							0.001	0.0026065		0.001	0.00308121		0.00299948	0.001		0.00489537	0.001
564	0.00119208	1	VDNKFNKELGDATTEIHCLPNLNEIQRGAFLRSLRN			564	0.000833931	1	VDNKFNKELFNAAFEIVSLPNLNDDQVLAFLHSLRD			564	0.00199948	1	VDNKFSKEWSSAVREISFLPNLNVRQGVAFVGSLYN			564	0.00194769	1	VDNKFNKEWRTAVVQILRLPNLNEGQQSAFVCSLDN							0.00219208	0.001		0.001	0.001		0.001	0.001		0.001	0.001
565	0.00119208	1	VDNKFNKELVSADLQIRILPNLNPCQESAFIHSLCN			565	0.000833931	1	VDNKFNKELFNAAFEIVSLPNLNDYQVLAFINSLRD			565	0.00199948	1	VDNKFSKEWPAAFYQILDLPNLNEYQGAAFVVSLFD			565	0.00194769	1	VDNKFNKEWRTASAQICNLPNLNGLQVDAFLHSLVD							0.00219208	0.001		0.001	0.001		0.001	0.001		0.00294768	0.001
566	0.00119208	1	VDNKFNKELYSAIDQISCLPNLNVVQQDAFVLSLTD			566	0.000833931	1	VDNKFNKELFNAAFEIVSLPNLNDYQVLAFLHSLRN			566	0.00199948	1	VDNKFSKEWLTANHEIRFLPNLNPVQGFAFIVSLHD			566	0.00194769	1	VDNKFNKEWRDATIQIVGLPNLNEVQECAFIRSLHN							0.00219208	0.001		0.001	0.001		0.00699844	0.0841818		0.001	0.001
567	0.00119208	1	VDNKFNKELYSAIYEIFSLPNLNLDQVIAFVISLFD			567	0.000833931	1	VDNKFNKELFNAAFEIVSLPNLNEDQELAFVISLNN			567	0.00199948	1	VDNKFSKEWDSAAIQICYLPNLNRIQVDAFVDSLAN			567	0.00194769	1	VDNKFNKEWRDAIYQICNLELKRDPGICLRFQPGQ							0.001	0.0026065		0.00767145	0.00932484		0.001	0.00293446		0.001	0.001
568	0.00119208	1	VDNKFNKELCDAYCEIGILPNLNDNQKSASLAACVT			568	0.000833931	1	VDNKFNKELFNAAFEIVSLPNLNGSQRLAFLHSLRD			568	0.00199948	1	VDNKFSKEWDAAVAQIGDLPNLNLVQGHAFIFSLCD			568	0.00194769	1	VDNKFNKEWRDAVLQIGRLPNLNGAPGECLHPQPGQ							0.00219208	0.001		0.00266786	0.001		0.001	0.00293446		0.001	0.001
569	0.00119208	1	VDNKFNKELCSAYTQIFFLPNLNVCQESAFVSSLFD			569	0.000833931	1	VDNKFNKELFNAAFEIVSLPNLTLSQERAFIISLNN			569	0.00199948	1	VDNKFSKEWDYAVYQIIHLPNLNQPQRSAFVPSLSN			569	0.00194769	1	VDNKFNKEWRDAVAEIIRLPNLNPCQLAAFITSLFD							0.001	0.0026065		0.00266786	0.001		0.001	0.001		0.001	0.001
570	0.00119208	1	VDNKFNKELFTATHQITVLPNLNVLQLRAFLSSLCD			570	0.000833931	1	VDNKFNKELFNAAFEIVSLPDLNLSQVLAFLHSLRD			570	0.00199948	1	VDNKFSKEWANATREIAGLPNLNGFQIPAFVYSLGD			570	0.00194769	1	VDNKFNKEWRDAVAEIIRLPNLNAAQKPAFVFSLGD							0.001	0.0026065		0.001	0.00308121		0.001	0.00486892		0.001	0.001
571	0.00119208	1	VDNKFNKD*VTQMVRLTPCRT*TGSRDVPSLIACLT			571	0.000833931	1	VDNKFNKELFNAAFEIVSLRN			571	0.00199948	1	VDNKFSKEWATAIAQIVNLPNLNGRQKCAFVPSLIN			571	0.00194769	1	VDNKFNKEWRDAVREIVNLPNLNHGQGSAFVFSLHN							0.001	0.0026065		0.001	0.001		0.001	0.001		0.001	0.00279459
572	0.00119208	1	VDNKFNKKGPMQMMRLTLCRT*TGVRSLPSLPACIM			572	0.000833931	1	VDNKFNKELFNAAFEIVGLPNLNLSQERAFIISLNN			572	0.00199948	1	VDNKFSKEWADAAIQIASLPNLNGCQGDAFVCSLDD			572	0.00194769	1	VDNKFNKEWRDASIQILNLPNLNPFQEVAFLYSLHD							0.00219208	0.001		0.001	0.001		0.00299948	0.0126068		0.001	0.00279459
573	0.00119208	1	VDNKFTKEGNAAVSQIGILPNLNDCQLLHYQPD*			573	0.000833931	1	VDNKFNKELFNAAFEIVSLPNLNLSQERAFIISLNN			573	0.00199948	1	VDNKFSKEWAAATIQIARLPNLNESQQNAFVSSLVN			573	0.00194769	1	VDNKFNKEWRDASLEISSLPNLNVVQGNAFVSSLCD							0.001	0.00581951		0.001	0.001		0.001	0.001		0.001	0.001
574	0.00119208	1	VDNKFTKEGINASHEIDCLPNLNLSQISAFVGSLGD			574	0.000833931	1	VDNKFNKELFNAAFEICQPAELKPQSGACLHNQPE*			574	0.00199948	1	VDNKFSKEWGDASSEILALPNLNVGQGDAFIGSLSD			574	0.00194769	1	VDNKFNKEWRDASFQIVRLPNLNVSQEHAFVASLHN							0.001	0.0026065		0.001	0.00516242		0.001	0.001		0.001	0.001
575	0.00119208	1	VDNKFTKEGVDAVIQISSLPNLNPYQKVAFVCSLYN			575	0.000833931	1	VDNKFNKELFNAAFEVVSLPNLNLSQERAFIISLNN			575	0.00199948	1	VDNKFSKEWGNAAAEILSLPNLNVGQEYAFVGSLND			575	0.00194769	1	VDNKFNKEWRDAVYEICCLPNLNRVQGPAFVDSLRD							0.00219208	0.001		0.001	0.001		0.001	0.001		0.001	0.001
576	0.00119208	1	VDNKFTKEGVDAVIRISSLPNLNPYQKVAFVCSLYN			576	0.000833931	1	VDNKFNKELFNAAFGIVSLPNLNLSQERAFIISLNN			576	0.00199948	1	VDNKFSKEWVDATNEIISLPNLNVVQEGAFVCSLSD			576	0.00194769	1	VDNKFNKEWRDAVYEICGLPNLNVSQESAFVCSLSN							0.00815248	0.00903252		0.00767145	0.00308121		0.001	0.001		0.00294768	0.001
577	0.00119208	1	VDNKFTKEGVSADHEIYALPNLNLPQKSAFIISLDN			577	0.000833931	1	VDNKFNKELFNAAFQIVSLPNLNLSQERAFIISLNN			577	0.00199948	1	VDNKFSKEWYDAIHEIASLPNLNHGQGTAFVCSLAD			577	0.00194769	1	VDNKFNKEWRDASDQISVLPNLNENQLSAFVVSLVD							0.001	0.0026065		0.001	0.001		0.001	0.00293446		0.001	0.00279459
578	0.00119208	1	VDNKFTKEGYNAYGEIFNLPNLNEVQELAFVDSLGN			578	0.000833931	1	VDNKFNKELFSAAFEIVSLPNLNLSQERAFIISLNN			578	0.00199948	1	VDNKFSKEWCYAVIEIGSLPNLNPHQGIAFICSLVD			578	0.00194769	1	VDNKFNKEWRDASDEILALPNLNEGQEFAFVRSLGD							0.001	0.0026065		0.001	0.00308121		0.001	0.001		0.00294768	0.00817836
579	0.00119208	1	VDNKFTKEGYAAVGQIGGLPNLNDFQRFAFIGSLNN			579	0.000833931	1	VDNKFNKVLCSAADEIFVLPNLNDDQVLAFINSLRN			579	0.00199948	1	VDNKFSKEWCAAVDEITGLPNLNGSQEIAFLSSLSD			579	0.00194769	1	VDNKFNKEWRAAAFEICCLPNLNGFQKAAFIPSLDN							0.00219208	0.001		0.001	0.001		0.00299948	0.001		0.001	0.001
580	0.00119208	1	VDNKFTKEGSAAAVEIPGLPNLNREQGGAFVVSLCN			580	0.000833931	1	VDNKFNKEGRNADGEITDLPNLNQCQELAFIVSLVN			580	0.00199948	1	VDNKFSKEWFYATLQIDTLPNLNVRQGSAFIHSLTN			580	0.00194769	1	VDNKFNKEWRAAVDQICNLPNLNGVQGSAFVNSLSD							0.00219208	0.001		0.00266786	0.00516242		0.00699844	0.00486892		0.00294768	0.001
581	0.00119208	1	VDNKFTKEGSAAAVEIPGLPNLNVCQRVAFIHSLSD			581	0.000833931	1	VDNKFNKEGDDAIVQISFLPNLNGDQLSAFVISLDN			581	0.00199948	1	VDNKFSKELSTAVYEIFALPNLNESQVVAFVVSLFD			581	0.00194769	1	VDNKFNKEWRAAVDQICNLPNLNGVQGSAFVGSLND							0.001	0.0026065		0.001	0.001		0.001	0.00680338		0.001	0.00279459
582	0.00119208	1	VDNKFTKEGSAAAVEIPGLPNLNVCQRVAFIHSLVD			582	0.000833931	1	VDNKFNKEGDYAVFQICGLPNLNEGQGAAFIISLNN			582	0.00199948	1	VDNKFSKELHNAISEIISLPNLNLVQLLAFITSLYD			582	0.00194769	1	VDNKFNKEWRAASYEICCLPNLNQGQGPAFILSLCD							0.00219208	0.0026065		0.001	0.00308121		0.00299948	0.001		0.00294768	0.001
583	0.00119208	1	VDNKFTKEGCNADREIGVLPNLNVYQIVAFIRSLDN			583	0.000833931	1	VDNKFNKEGDYAVFQICGLPNLNEGQVLAFLHSLRD			583	0.00199948	1	VDNKFSKELHDAVHQIFNLPNLNRDQKCAFIFSLFD			583	0.00194769	1	VDNKFNKEWRAASDEICGLPNLNGCQGGAFVTSLSD							0.001	0.0026065		0.001	0.001		0.001	0.00293446		0.001	0.001
584	0.00119208	1	VDNKFTKEVSNAIYQIVCLPNLNELQKGAFVNSLRD			584	0.000833931	1	VDNKFNKEGAAAITQINVLPNLNVAQVNAFVGSLRN			584	0.00199948	1	VDNKFSKELLYAFSEIPFCRT*TTLRGSPSYSACLT			584	0.00194769	1	VDNKFNKEWRAATIEICGLPNLNRCQGAAFLTSLPN							0.001	0.0026065		0.001	0.001		0.001	0.00486892		0.001	0.001
585	0.00119208	1	VDNKFTKEVIYAAVQIDYLPNLNPRQRRAFVTSLFD			585	0.000833931	1	VDNKFNKEVCDAYAQIGNLPNLNVYQIVAFIRSLDN			585	0.00199948	1	VDNKFSKELAYAIHEIFCLPNLNDAQRIAFIFSLFD			585	0.00194769	1	VDNKFNKEWRAATHQILVLPNLNVFQEDAFVSSLNN							0.001	0.0026065		0.0160108	0.0218121		0.001	0.001		0.001	0.00279459
586	0.00119208	1	VDNKFTKEVPDAIREIFILPNLNEGQVVAFVVSLFD			586	0.000833931	1	VDNKFNKEWSYATCQILALPNLNAPQESAFICSLSN			586	0.00199948	1	VDNKFSKELAYAIHEIFCLPNLNEPQVCAFVVSLCD			586	0.00194769	1	VDNKFNKEWRAATHQILVLPNLNVFQEDAFVSSLSD							0.00219208	0.001		0.001	0.001		0.001	0.00293446		0.001	0.001
587	0.00119208	1	VDNKFTKEVPNASDQIFLLPNLNDYQVLAFLHSLRD			587	0.000833931	1	VDNKFNKEWLDATFQILILPNLNGLQEFAFLDSLGN			587	0.00199948	1	VDNKFSKELGTAIHEIFALPNLNRDQKCAFIFSLFD			587	0.00194769	1	VDNKFNKEWRAAIAQILNLPNLNPSQGAAFVCSLPN							0.001	0.00421301		0.00933931	0.0155685		0.001	0.001		0.001	0.001
588	0.00119208	1	VDNKFTKEVPNASDQIFLLPNLNDYQVLAFLNSLRD			588	0.000833931	1	VDNKFNKEWDDAVDQIVSLPNLNGVQEGAFIVSLDD			588	0.00199948	1	VDNKFSKELGTAIHEIFALPNLNANQVIAFVCSLFD			588	0.00194769	1	VDNKFNKEWRAAIHEIALLPNLNDFQVGAFLPSLND							0.001	0.0026065		0.00266786	0.001		0.001	0.00486892		0.00294768	0.001
589	0.00119208	1	VDNKFTKEVRSAYFQIGSLPNLNDVQGCAFISSLPD			589	0.000833931	1	VDNKFNKEWGTATSQIYRLPNLNAFQEFAFIFSLTN			589	0.00199948	1	VDNKFSKELVDATIEITDLPNLNDVQVFAFIYSLFD			589	0.00194769	1	VDNKFNKEWRAAADQIGSLPNLNGSQEIAFLVSLDN							0.00219208	0.001		0.001	0.001		0.001	0.00486892		0.001	0.00458918
590	0.00119208	1	VDNKFTKEVLSATVQILNLPKPGSGICLHYQPAQ			590	0.000833931	1	VDNKFNKEWCTAVDEIVRLPNLNEGQETAFIGSLVD			590	0.00199948	1	VDNKFSKELVDATIEIHYLPNLNRDQKCAFIFSLFD			590	0.00194769	1	VDNKFNKEWRAAVLEICSLPNLNESQGVAFLPSLGD							0.00219208	0.001		0.00266786	0.001		0.001	0.001		0.001	0.001
591	0.00119208	1	VDNKFTKEVVDAAIQICALPNLNLDQEGAFLISLLT			591	0.000833931	1	VDNKFNKELFNAAFEIVSLPNLNLSQERAFIISLNN			591	0.00199948	1	VDNKFSKELVDAIFEIFVLPNLNDAQRIAFIFSLFD			591	0.00194769	1	VDNKFNKEWRAASNEILCLPNLNGVQRPAFINSLGD							0.00219208	0.001		0.001	0.001		0.001	0.001		0.001	0.00279459
592	0.00119208	1	VDNKFTKEVYAAICEIVSLPNLNGTQGSAFLCSLSN			592	0.000833931	1	VDNKFTKEVPNASDQIFLLPNLNLSQERAFIISLNN			592	0.00199948	1	VDNKFSKELVDAIFEIFVLPNLNESQVSAFVVSLFD			592	0.00194769	1	VDNKFNKEWRAASYEIINLPNLNPLQGGAFICSLCD							0.00219208	0.001		0.00266786	0.001		0.001	0.001		0.00294768	0.001
593	0.00119208	1	VDNKFTKEVCDAYAQIGNLPNLNVYQIVAFIRSLDN			593	0.000833931	1	VDNKFTKEVPNASDQIFLLPNLNDDQVLAFINSLRD			593	0.00199948	1	VDNKFSKELYSAVCEIHFLPNLNPSQRLAFIFSLFD			593	0.00194769	1	VDNKFNKEWRAASFEIINLPNLNAGQEGAFLGSLRN							0.00219208	0.001		0.00266786	0.00516242		0.001	0.00680338		0.001	0.001
594	0.00119208	1	VDNKFTKEVCYAFNEIYALPNLNHAQMNAFLISLSN			594	0.000833931	1	VDNKFTKED			594	0.00199948	1	VDNKFSKELCDATVEIHFLPNLNVDQRHAFIFSLFD			594	0.00194769	1	VDNKFNKEWRAASIFIGSLSN							0.001	0.0026065		0.001	0.00308121		0.001	0.001		0.001	0.00279459
595	0.00119208	1	VDNKFTKEVFSAFYQISSLPNLNLLQKSAFVDSLNN			595	0.000833931	1	VDNKFTKEGNDAADEIFILPNLNDYQVLAFLHSLRD			595	0.00199948	1	VDNKFSKELCDAIVEIHFLPNLNVDQRHAFIFSLFD			595	0.00194769	1	VDNKFNKEWRAASHQICSLPNLNRCQEIAFVVSLTD							0.00219208	0.001		0.001	0.00308121		0.001	0.001		0.001	0.00279459
596	0.00119208	1	VDNKFTKEWSSASDQICNLPNLNRSQQIAFIPSLPN			596	0.000833931	1	VDNKFTKEGPNASDQIFLLPNLNDYQVLAFLHSLRD			596	0.00199948	1	VDNKFSKELCDAIVEIHFLPNLKVDQRHAFIFSLFD			596	0.00194769	1	VDNKFNKEWRAASYQIVRLPNLNGNQEDAFIRSLSN							0.00457624	0.001		0.001	0.001		0.001	0.001		0.001	0.001
597	0.00119208	1	VDNKFTKEWIYATAEILALPNLNGFQEFAFIDSLSD			597	0.000833931	1	VDNKFTKEGDYAVFQICGLPNLNDYQVLAFLHSLRD			597	0.00199948	1	VDNKFSKELCDAIVEIHFLPNLNPGQVCAFVVSLFN			597	0.00194769	1	VDNKFNKEWRYAISQILALPNLNVLQGRAFVNSLSD							0.00219208	0.001		0.001	0.001		0.001	0.001		0.00294768	0.001
598	0.00119208	1	VDNKFTKEWHSASTQIDTLPNLNALQRYAFIRSLGN			598	0.000833931	1	VDNKFTKEGDYAVFQICGLPNLNEGQGAAFVGSLHN			598	0.00199948	1	VDNKFSKELCDAIVEIHFLPNLNDAQRIAFIFSLFD			598	0.00194769	1	VDNKFNKEWRYAVNQILSLPNLNGGQGAAFIYSLRN							0.001	0.0026065		0.001	0.001		0.001	0.001		0.001	0.001
599	0.00119208	1	VDNKFTKEWLNASIEILCLPNLNHVQGGAFLASLDD			599	0.000833931	1	VDNKFTKEVTNASDQIFLLPNLNDYQVLAFLHSLRN			599	0.00199948	1	VDNKFSKELCDAIVEIHFLPNLNDAQRIAFIFSLFD			599	0.00194769	1	VDNKFNKEWRYAVNQILSLPNLNGGQGAAFVHSLCD							0.00219208	0.001		0.001	0.001		0.001	0.001		0.001	0.00279459
600	0.00119208	1	VDNKFTKEWASASNEIISLPNLNVIQKDAFVDSLHD			600	0.000833931	1	VDNKFTKEVIAAIYEINALPNLNVHQQGAFLGSLFD			600	0.00199948	1	VDNKFSKELCDAIVEIHFLPNLNDYQRLAFIFSLFD			600	0.00194769	1	VDNKFNKEWRYAVVQICRLPNLNARQEIAFLASLSN							0.001	0.0026065		0.001	0.00308121		0.001	0.001		0.001	0.001
601	0.00119208	1	VDNKFTKEWVTASHQISSLPNLNVDQGDAFVNSLSD			601	0.000833931	1	VDNKFTKEVPNAYDQIFLLPNLNDYQVLAFLHSLRD			601	0.00199948	1	VDNKFSKELCDAIVEIHFLPNLNDYQRVAFIFSLFD			601	0.00194769	1	VDNKFNKEWRYATDQICSLPNLNVNQGNAFLSSLYD							0.001	0.0026065		0.001	0.001		0.00299948	0.001		0.001	0.001
602	0.00119208	1	VDNKFTKEWVDATGEIPILPNLNAYQENAFIGSLDN			602	0.000833931	1	VDNKFTKEVPNASDQIFLLPNLNDYQVLAFINSLRN			602	0.00199948	1	VDNKFSKELCDAIVEIHFLPNLNDYQRVAFIFSLFD			602	0.00194769	1	VDNKFNKEWRYAVREICSLPNLNERQGIAFISSLDN							0.00219208	0.001		0.00433572	0.001		0.00699844	0.001		0.001	0.001
603	0.00119208	1	VDNKFTKEWVTAIFQINHLPNLNLAQMFAFLRSLDD			603	0.000833931	1	VDNKFTKEVPNASDQIFLLPNLNDYQVLAFINSLRN			603	0.00199948	1	VDNKFSKELCDAIVEIHFLPNLNESQVSAFVVSLFD			603	0.00194769	1	VDNKFNKEWRYAVSEICSLPNLNDSQGSAFLYSLPD							0.001	0.0026065		0.001	0.001		0.00499896	0.001		0.001	0.001
604	0.00119208	1	VDNKFTKEWYDAFAEIRSLPNLNVLQQGAFVRSLRN			604	0.000833931	1	VDNKFTKEVPNASIKFFSCRT*TTIRCLPSYTACVT			604	0.00199948	1	VDNKFSKELCDAIVEIHFLPNLNEGQVVAFVVSLFD			604	0.00194769	1	VDNKFNKEWRSATVEILVLPNLNQVQGYAFLNSLDD							0.00219208	0.001		0.00266786	0.001		0.00299948	0.001		0.001	0.00279459
605	0.00119208	1	VDNKFTKEWYTATYEIFHLPNLNPNQMYAFVISLLN			605	0.000833931	1	VDNKFTKEVPNASEQIFLLPNLNDYQVLAFLHSLRD			605	0.00199948	1	VDNKFSKELCDAIVEIHFLPNLNANQVIAFIFSLFD			605	0.00194769	1	VDNKFNKEWRSATFQILSLPNLNGCQKTAFIPSLIN							0.001	0.0026065		0.001	0.001		0.001	0.001		0.00684306	0.00817836
606	0.00119208	1	VDNKFTKELGTAVYQIRGLPNLNGGQMVAFLGSLIN			606	0.000833931	1	VDNKFTKEVPNASDQNFLLPNLNDYQVLAFLHSLRD			606	0.00199948	1	VDNKFSKELCDAIVEIHFLPNLNVDQRHAFIFSLFD			606	0.00194769	1	VDNKFNKEWRSAVSEIALLPNLNVFQETAFVCSLTD							0.0188812	0.0347366		0.001	0.00308121		0.00299948	0.00293446		0.001	0.001
607	0.00119208	1	VDNKFTKELCYAIVEIYSLPNLNDGQRFAFVNSLCN			607	0.000833931	1	VDNKFTKEVPNASDQSFLLPNLNDYQVLAFLHSLRD			607	0.00199948	1	VDNKFSKELCDAIVEIHFLPNLNVDQRHAFIFSLFD			607	0.00194769	1	VDNKFNKEWRSASRQICDLPNLNVPQGHAFLRSLDN							0.001	0.0026065		0.00266786	0.001		0.001	0.00293446		0.001	0.001
608	0.00119208	1	VDNKFTKEGSTAFGQICYLPNLNVVQRIAFVFSLAN			608	0.000833931	1	VDNKFTKEVPNASDQIFLLPNLNDYQVLAFLHSLRD			608	0.00199948	1	VDNKFSKELCDAIVEIHFLPNLNVDQRHAFIFSLCD			608	0.00194769	1	VDNKFNKEWLNASVEICSLPNLNPGQEAAFVSSLPD							0.0069604	0.00421301		0.001	0.001		0.001	0.001		0.001	0.001
609	0.00119208	1	VDNKFTKEGHNAFAEIHRLPNLNASQVSALLRSLDD			609	0.000833931	1	VDNKFTKEVPNASDQIFLLPNLNDYQVLAFLHSLRD			609	0.00199948	1	VDNKFSKELCDAIVEIHFLPNLNVDQRHAFIFSLFD			609	0.00194769	1	VDNKFNKEWLTAVNQIVALPNLNGGQESAFVNSLYD							0.00219208	0.001		0.00600359	0.001		0.00299948	0.00293446		0.001	0.001
610	0.00119208	1	VDNKFTKEGLYAFREIRCLPNLNLIQRGAFLCSLDD			610	0.000833931	1	VDNKFTKEVPNASDQILLLPNLNDYQVLAFLHSLRD			610	0.00199948	1	VDNKFSKELCDAIVEIHFLPNLNVDQVIAFVCSLFD			610	0.00194769	1	VDNKFNKEWLDATLEILSLPNLNEGQEHAFIGSLGD							0.001	0.0026065		0.001	0.001		0.001	0.001		0.001	0.00279459
611	0.00119208	1	VDNKFTKEGDTAVGEIVHLPNLNVPQKCAFIGSLDN			611	0.000833931	1	VDNKFTKEVPNASDQISLLPNLNDYQVLAFHTACAM			611	0.00199948	1	VDNKFSKELCDAIVEIHFLPNLNFDQRHAFIFSLFD			611	0.00194769	1	VDNKFNKEWLDATLEILGLPNLNGYQGGAFICSLSD							0.00219208	0.001		0.001	0.001		0.001	0.00293446		0.001	0.00279459
612	0.00119208	1	VDNKFTKEGDAAIFQISSLPNLNARQRCAFVCSLSN			612	0.000833931	1	VDNKFTKEVPNASDQIFILPNLNDYQVLAFINSLRN			612	0.00199948	1	VDNKFSKELCDAIVEIHFLPNLNVDQRHAFIFSLFD			612	0.00194769	1	VDNKFNKEWLDATNQICFLPNLNRAQQDAFVASLGD							0.00457624	0.001		0.00266786	0.001		0.00699844	0.026148		0.00294768	0.001
613	0.00119208	1	VDNKFTKEGVYAACQIGYLPNLNECQGTAFVRSLVD			613	0.000833931	1	VDNKFTKEVPNASDQIFPLPNLNDYQVLAFLHSLRD			613	0.00199948	1	VDNKFSKELCDSIVEIHFLPNLNVDQRHAFIFSLFD			613	0.00194769	1	VDNKFNKEWLDAVSQISGLPNLNGGQGSAFVDSLAD							0.001	0.0026065		0.00266786	0.001		0.001	0.001		0.00294768	0.001
614	0.00119208	1	VDNKFTKEGVSADHQIPILPNLNRRQRAAFIVSLRD			614	0.000833931	1	VDNKFTKEVPNASDQIFPCRT*TTIRCLPSYTACVT			614	0.00199948	1	VDNKFSKELCYAVSEIHYLPNLNRDQKCAFIFSLFD			614	0.00194769	1	VDNKFNKEWLDASREILILPNLNQVQQDAFVFSLSN							0.0069604	0.00903252		0.001	0.00308121		0.001	0.001		0.001	0.00279459
615	0.00119208	1	VDNKFTKEGSDAFGEIFRLPNLNHTQGDAFVYSLVD			615	0.000833931	1	VDNKFTKEVPNASDQIFRLPNLNLSQERAFIISLNN			615	0.00199948	1	VDNKFSKELCYAVSEIHYLPNLNRYQKCAFIFSLFD			615	0.00194769	1	VDNKFNKEWLAASLQICALPNLNVGQGVAFIGSLRD							0.0069604	0.001		0.001	0.001		0.001	0.001		0.001	0.00279459
616	0.00119208	1	VDNKFTKEGCSAALEIGHLPNLNLGQRHAFLGSLDD			616	0.000833931	1	VDNKFTKEVPNASDQIFLMPNLNDDQVLAFINSLRN			616	0.00199948	1	VDNKFSKELFNAFSQIHNLPNLNRVQEGASLTD			616	0.00194769	1	VDNKFNKEWLAASFQILSLPNLNHCQEYAFLDSLND							0.00219208	0.001		0.00266786	0.00308121		0.001	0.001		0.001	0.001
617	0.00119208	1	VDNKFTKEGFDATSEICNLPNLNAAQLQCLHLQPDR			617	0.000833931	1	VDNKFTKEVPNASDQIFLMPNLNDYQVLAFINSLRN			617	0.00199948	1	VDNKFSKELFDAFCQIYSLPNLNLNQRGAFLCSLID			617	0.00194769	1	VDNKFNKEWLAAFPEIGCLPNLNDAQVTAFVFSLDD							0.00219208	0.001		0.001	0.001		0.001	0.001		0.001	0.00458918
618	0.00119208	1	VDNKFTKEVTAAYNEIHFLPNLNVGQLFAFIFSLFD			618	0.000833931	1	VDNKFTKEVPNASDQIFLLPNVNDYQVLAFLHSLRD			618	0.00199948	1	VDNKFSKEFCDAIVEIHFLPNLNPSQRLAFIFSLFD			618	0.00194769	1	VDNKFNKEWLYASIEICRLPNLNRIQEGAFISSLPN							0.00219208	0.001		0.00266786	0.001		0.0229943	0.00293446		0.001	0.001
619	0.00119208	1	VDNKFTKEVTAAYNEIHFLPNLNVGQLFAFLNSLGD			619	0.000833931	1	VDNKFTKEVPNASDQIFLLPNLKLSQERAFIISLNN			619	0.00199948	1	VDNKFSKEFCDAIVEIHFLPNLNVDQRHAFIFSLFD			619	0.00194769	1	VDNKFNKEWLYASAQILDLPNLNRSQRPAFVGSLYD							0.00338416	0.001		0.001	0.00308121		0.001	0.001		0.001	0.001
620	0.00119208	1	VDNKFTKEVSDAVVQIHFLPNLNAYQKCAFIFSLLN			620	0.000833931	1	VDNKFTKEVPNASDQIFLLPNLNHYQVLAFLHSLRD			620	0.00199948	1	VDNKFSKEFCDAIVEIHFLPNLNVDQRHAFIFSLFD			620	0.00194769	1	VDNKFNKEWLYASAQILDLPNLNGGQGVAFVDSLSN							0.00219208	0.001		0.00433572	0.00308121		0.001	0.001		0.00294768	0.001
621	0.00119208	1	VDNKFTKEVINAAAQIGRLPNLNACQVHAFIVSLGD			621	0.000833931	1	VDNKFTKEVPNASDQIFLLPNLNQAQRCAFIASLFN			621	0.00199948	1	VDNKFSKVVVDATIEIHYLPNLNRDQKCAFIFSLFD			621	0.00194769	1	VDNKFNKEWLYATDEILCLPNLNEAQVGAFVDSLPN							0.00338416	0.001		0.00266786	0.001		0.001	0.00873784		0.00294768	0.001
622	0.00119208	1	VDNKFTKEVLAADFQICLLPNLNHIQRGAFVDSLID			622	0.000833931	1	VDNKFTKEVPNASDQIFLLPNLNLSQERASIISLNN			622	0.00199948	1	VDNKFSQEVVDATIEIHYLPNLNRDQKCAFIFSLFD			622	0.00194769	1	VDNKFNKEWLYATDQICCLPNLNRGQGCAFIHSLNN							0.00219208	0.001		0.0343572	0.00308121		0.00899792	0.0280824		0.001	0.001
623	0.00119208	1	VDNKFTKEVLAADVEIDGLPNLNQDQRHAFVSSLPD			623	0.000833931	1	VDNKFTKEVPNASDQIFLLPNLNLSQERAFISA*IM			623	0.00199948	1	VDNKFS*EVVDATIEIHYLPNLNRDQKCAFIFSLFD			623	0.00194769	1	VDNKFNKEWLYAVAEILSLPNLNDFQGNAFIPSLCN							0.00219208	0.001		0.00266786	0.001		0.00299948	0.001		0.001	0.001
624	0.00119208	1	VDNKFTKEVDSAVFEIHILPNLNDAQRIAFIFSLFD			624	0.000833931	1	VDNKFTKEVPNASDQIFLLPNLNLSQERAFINSLRD			624	0.00199948	1	VDNKFSKEVVDATIEIHYLPNLNRDQKCAFIFSLFD			624	0.00194769	1	VDNKFNKEWLSATSQILILPNLNVVQEHAFIDSLVD							0.001	0.0026065		0.001	0.001		0.001	0.00293446		0.001	0.001
625	0.00119208	1	VDNKFTKEVDSAVFEIHILPNLNDYQIVAFIRSLRD			625	0.000833931	1	VDNKFTKEVPNASDQIFLLPNLNDDQVLAFIISLNN			625	0.00199948	1	VDNKFSKEVCDAIHEIHFLPNLNDAQRIAFIFSLFD			625	0.00194769	1	VDNKFNKEWLSASYEIARLPNLNLLQGGAFLGSLVD							0.00338416	0.00421301		0.001	0.00516242		0.001	0.00293446		0.001	0.001
626	0.00119208	1	VDNKFTKEVGTANGQIYFLPNLNGRQGGAFVRSLAD			626	0.000833931	1	VDNKFTKEVPNASDQIFLLPNLNDDQVLAFLHSLRE			626	0.00199948	1	VDNKFSICRT*TTIRQSPSQSACLM			626	0.00194769	1	VDNKFNKEWLNAVSEICLLPNLNVGQELAFVDSLYN							0.00219208	0.001		0.001	0.001		0.001	0.00680338		0.00294768	0.00279459
627	0.00119208	1	VDNKFTKEVGYAFFEIDDLPNLNDSQRCAFIFSLSN			627	0.000833931	1	VDNKFTKEVPNASDQIFLLPNLND*QVLAFLHSLRD			627	0.00199948	1	VDNKFSKEVSAAIDQIGFLPNLNLIQMYAFILSLND			627	0.00194769	1	VDNKFNKEWLNASSQILLLPNLNAGQEVAFIFSLAD							0.00219208	0.001		0.001	0.001		0.001	0.001		0.001	0.00638377
628	0.00119208	1	VDNKFTKEVSYATIEISRLPNLNHTQRNAFVGSLSN			628	0.000833931	1	VDNKFTKEVPNASDQIFLLPNLNDYKVLAFLHSLHD			628	0.00199948	1	VDNKFSKEVLNAYSEIFLLPNLNRDQKCAFIFSLFD			628	0.00194769	1	VDNKFNKEWLNATYEIVSLPNLNESQEYAFVCSLRD							0.00219208	0.001		0.001	0.001		0.001	0.001		0.001	0.001
629	0.00119208	1	VDNKFTKEVSSAVGQINGLPNLNVAQRCAFVISLRD			629	0.000833931	1	VDNKFTKEVPNASDQIFLLPNLNDYQLLAFLHSLRD			629	0.00199948	1	VDNKFSKEVDSAVFEIHILPNLNDYQRVAFIFSLFD			629	0.00194769	1	VDNKFNKEWLNATCQIHSLPNLNEGQEHAFIHSLCD							0.00219208	0.001		0.259519	0.0176497		0.001	0.001		0.001	0.001
630	0.00119208	1	VDNKFTKEVSSANIQIPVLPNLNVSQETAFVVSLCN			630	0.000833931	1	VDNKFTKEVPNASDQIFLLPNLNDYQLFAFIDSLGD			630	0.00199948	1	VDNKFSKEVDSAVFEIHFLPNLNDAQRIAFIFSLFD			630	0.00194769	1	VDNKFNKEWLNAAVEICALPNLNVGQEYAFIGSLYN							0.00219208	0.001		0.001	0.00516242		0.001	0.001		0.001	0.001
631	0.00119208	1	VDNKFTKEVCDAYAQIGNLPNLNVYQIVAFIRSLDN			631	0.000833931	1	VDNKFTKEVPNASDQIFLLPNLNDYQERAFIISLRD			631	0.00199948	1	VDNKFSKEVDSAVFEIHFLPNLNDAQRIAFIFSLFD			631	0.00194769	1	VDNKFNKEWLNAVPQILNLPNLNRAQRPAFITSLYN							0.00219208	0.001		0.00600359	0.011406		0.001	0.0203446		0.001	0.00638377
632	0.00119208	1	VDNKFTKEVCDASCEIVALPNLNQIQRNAFIFSLFD			632	0.000833931	1	VDNKFTKEVPNASDQIFLLPNLNDYQGRAFLCSLVN			632	0.00199948	1	VDNKFSKEVCDAIHEIHILPNLNDYQRVAFIFSLFD			632	0.00194769	1	VDNKFNKEWLNASNQIIGLPNLNLYQGGAFVRSLPD							0.0594119	0.0315236		0.001	0.001		0.00699844	0.0493615		0.001	0.001
633	0.00119208	1	VDNKFTKEVFYASYQIRCLPNLNQYQEAAFISSLID			633	0.000833931	1	VDNKFTKEVPNASDQIFLLPNLNDYQGAAFVGSLHN			633	0.00199948	1	VDNKFSKEVCDAIYEIHILPNLNRDQKCAFIFSLFD			633	0.00194769	1	VDNKFNKEWLNASNQIIGLPNLNLYQGGAFVRSLSD							0.001	0.0026065		0.00266786	0.001		0.001	0.00293446		0.001	0.00279459
634	0.00119208	1	VDNKFTKEVFYASYQIRCLPNLNQYQEAAFISSLIY			634	0.000833931	1	VDNKFTKEVPNASDQIFLLPNLNDYQVLSFLHSLRD			634	0.00199948	1	VDNKFSKEVFDAIHEIHFLPNLNDAQRIAFIFSLFD			634	0.00194769	1	VDNKFNKEWLNASTQILDLPNLNGPQQTAFVPSLDD							0.001	0.00421301		0.00266786	0.00516242		0.001	0.001		0.001	0.001
635	0.00119208	1	VDNKFTKEWNDADRQILDLPNLNLIQLSAFVVSLNN			635	0.000833931	1	VDNKFTKEVPNASDQIFLLPNLNDYQVLAFIHSLNN			635	0.00199948	1	VDNKFSKEVFDAAFEICFLPNLNADQRVAFVVSLGD			635	0.00194769	1	VDNKFNKEWLNASTQILDLPNLNVYQRGAFVRNLDD							0.0069604	0.00581951		0.00266786	0.001		0.001	0.00293446		0.001	0.001
636	0.00119208	1	VDNKFTKEWNYAVNEISNLPNLNVGQEFAFVGSLSD			636	0.000833931	1	VDNKFTKEVPNASDQIFLLPNLNDYQVLAFIRSLRD			636	0.00199948	1	VDNKFSKEWTYAVYEILALPNLNGFQLCAFVPSLDD			636	0.00194769	1	VDNKFNKEWLTASTQILCLPNLNQIQEYAFIGSLYN							0.0069604	0.010639		0.001	0.001		0.00299948	0.001		0.001	0.00279459
637	0.00119208	1	VDNKFTKEWSDASDEIFALPNLNDTQKPAFVCSLVN			637	0.000833931	1	VDNKFTKEVPNASDQIFLLPNLNDYQVLAFIISLGD			637	0.00199948	1	VDNKFSKEWSAAIYQISCLPNLNQFQLNAFVISLSD			637	0.00194769	1	VDNKFNKEWLTATNQILSLPNLNANQEFAFVHSLCD							0.001	0.0026065		0.00266786	0.001		0.00299948	0.001		0.001	0.001
638	0.00119208	1	VDNKFTKEWSDAVVEIASLPNLNGCQERAFVASLGD			638	0.000833931	1	VDNKFTKEVPNASDQIFLLPNLNDYQVLAFHTACVT			638	0.00199948	1	VDNKFSKEWSYATCQIISLPNLNVGQVGAFVGSLSD			638	0.00194769	1	VDNKFNKEWLTASCEILTLPNLNGPQGPAFVCSLNN							0.001	0.0026065		0.001	0.00308121		0.001	0.001		0.00489537	0.001
639	0.00119208	1	VDNKFTKEWSDASGEILCLPNLNGLQESAFVCSLGD			639	0.000833931	1	VDNKFTKEVPNASDQIFLLPNLNDYQVLAFPHSLRD			639	0.00199948	1	VDNKFSKEWITAVFQICFLPNLNVSQRSAFIFSLFD			639	0.00194769	1	VDNKFNKEWLDATAQICDLPNLNGPQVGAFVFSLID							0.001	0.00421301		0.001	0.001		0.001	0.001		0.001	0.001
640	0.00119208	1	VDNKFTKEWSAATCEIGALPNLNGAQMSAFIVSLHN			640	0.000833931	1	VDNKFTKEVPNASDQIFLLPNLNDYQVLAFRHSLRD			640	0.00199948	1	VDNKFSKEWHSAVLEIIDLPNLNVTQRVAFIISLVD			640	0.00194769	1	VDNKFNKEWLDAARQIGNLPNLNVGQETAFLGSLAN							0.00576832	0.001		0.00600359	0.001		0.001	0.001		0.001	0.001
641	0.00119208	1	VDNKFTKEWHSANSQISFLPNLNGHQKVAFLPSLSN			641	0.000833931	1	VDNKFTKEVPNASDQIFLLPNLNDYQVLAFLHSQRD			641	0.00199948	1	VDNKFSKEWRNAAHQILHLPNLNLYQGLAFVPSLYD			641	0.00194769	1	VDNKFNKEWLDAIDEICRLPNLNEFQEDAFVSSLTD							0.001	0.0026065		0.001	0.00308121		0.001	0.00293446		0.001	0.00638377
642	0.00119208	1	VDNKFTKEWRNAIFQIGGLPNLNGGQIDAFVFSLSN			642	0.000833931	1	VDNKFTKEVPNASDQIFLLPNLNDYQVLAFLHSLTD			642	0.00199948	1	VDNKFSKEWRYASYEICRLPNLNRPQLSAFLSSLDD			642	0.00194769	1	VDNKFNKEWLDAASQIVSLPNLNEGQGFAFVGSLSN							0.001	0.0026065		0.001	0.001		0.001	0.001		0.00294768	0.00458918
643	0.00119208	1	VDNKFTKEWRDAFLEIRSLPNLNVCQRYAFVPSLVD			643	0.000833931	1	VDNKFTKEVPNASDQIFLLPNLNDYQVLAFLHSLPD			643	0.00199948	1	VDNKFSKEWLSAICEIVTLPNLNDAQGDAFIFSLHD			643	0.00194769	1	VDNKFNKEWLDAVNQILNLPNLNVCQGHAFVNSLPN							0.001	0.0026065		0.00266786	0.001		0.00299948	0.001		0.00294768	0.001
644	0.00119208	1	VDNKFTKEWLTAVTEINFLPNLNGYQLCAFLCSLFD			644	0.000833931	1	VDNKFTKEVPNASDQIFLLPNLNDYQVLAFLHSLRD			644	0.00199948	1	VDNKFSKEWLTATSEILCLPNLNEAQGVPSYAA*VT			644	0.00194769	1	VDNKFNKEWLDASAQIAVLPNLNVGQEIAFIGSLYD							0.00457624	0.001		0.001	0.001		0.0169958	0.0280824		0.001	0.00279459
645	0.00119208	1	VDNKFTKEWDDANRQIAALPNLNPSQMGAFVSSLID			645	0.000833931	1	VDNKFTKEVPNASDQIFLLPNLNDYQVLAFLHSLRD			645	0.00199948	1	VDNKFSKEWLDASVQIGSLPNLNLAQISAFLISLVD			645	0.00194769	1	VDNKFNKEWLDASSEILNLPNLNQCQEVAFLLSLSD							0.00338416	0.001		0.001	0.001		0.001	0.00293446		0.001	0.001
646	0.00119208	1	VDNKFTKEWAYAISEIVALPNLNQIQKHAFIISLGN			646	0.000833931	1	VDNKFTKEVPNASDQIFLLPNLNDYQVLAFLHSLRH			646	0.00199948	1	VDNKFSKEWDYAALQIYDLPNLNVCQGLAFVNSLGD			646	0.00194769	1	VDNKFNKEWLAASSQILSLPNLNGHQEPAFLLSLVD							0.001	0.00421301		0.001	0.001		0.001	0.001		0.00294768	0.001
647	0.00119208	1	VDNKFTKEWVAAFIQISSLPNLNVGQEHAFLTSLGD			647	0.000833931	1	VDNKFTKEVPNASDQIFLLPNLNDYQVLAFLHSLRV			647	0.00199948	1	VDNKFSKEWADAVFQITGLPNLNVFQQRAFVGSLDD			647	0.00194769	1	VDNKFNKEWLAATAQIFGLPNLNDTQEVAFIRSLSD							0.00219208	0.001		0.001	0.001		0.001	0.001		0.001	0.00279459
648	0.00119208	1	VDNKFTKEWYTAVLEIDRLPNLNLVQMGAFVGSLND			648	0.000833931	1	VDNKFTKEVPNASDQIFLLPNLNDYQVLAFLHSLDN			648	0.00199948	1	VDNKFSKEWGDANAQIALLPNLNVCQRYAFLPSLSN			648	0.00194769	1	VDNKFNKEWLAAIHQILHLPNLNGGQVGAFLASLVD							0.00338416	0.00421301		0.001	0.00308121		0.001	0.00293446		0.001	0.001
649	0.00119208	1	VDNKFTKEWYAAYRQIRDLPNLNHNQIGAFIYSLTN			649	0.000833931	1	VDNKFTKEVPNASDQIFLLPNLNDYQVLAFLHSLGD			649	0.00199948	1	VDNKFSKEWGYATNEILCLPNLNGAQQPAFLNSLAN			649	0.00194769	1	VDNKFNKEWLAAAGQICSLPNLNAYQLDAFVGSLDD							0.00457624	0.00581951		0.001	0.001		0.001	0.001		0.001	0.001
650	0.00119208	1	VDNKFTKEWSYANAEISCLPNLNHVQVAAFLVSLVN			650	0.000833931	1	VDNKFTKEVPNASDQIFLLPNLNDYQVLAFLHSLYN			650	0.00199948	1	VDNKFSKEWVYASYEICRLPNLNVYQEGAFIGSLID			650	0.00194769	1	VDNKFNKEWLAAASEIANLPNLNVTQEGAFIGSLGD							0.001	0.0026065		0.00266786	0.001		0.001	0.00293446		0.00294768	0.001
651	0.00119208	1	VDNKFTKEWSNADHEIDDLPNLNRIQRGAFVASLFD			651	0.000833931	1	VDNKFTKEVPNASDQIFLLPNLNDYQVLAFLHSLCN			651	0.00199948	1	VDNKFSKEWYDASHEISNLPNLNGNQGRAFICSLDN			651	0.00194769	1	VDNKFNKEWLAAAHQISVLPNLNGAQRPAFLPSLYD							0.001	0.0026065		0.001	0.001		0.00299948	0.00293446		0.001	0.001
652	0.00119208	1	VDNKFTKEWSDASIQICCLPNLNGYQRRAFLCSLLD			652	0.000833931	1	VDNKFTKEVPNASDQIFLLPNLNDYQVLAFLHSVRD			652	0.00199948	1	VDNKFSKEWYNAIHQIFNLPNLNPSQRLAFIFSLFD			652	0.00194769	1	VDNKFNKEWLAAVSEILRLPNLNVIQEPAFVCSLRD							0.00338416	0.001		84.5666	80.3794		0.001	0.00293446		0.001	0.00279459
653	0.00119208	1	VDNKFTKEWSAAVYEIFGLPNLNARQKPAFLVSLCD			653	0.000833931	1	VDNKFTKEVPNASDQIFLLPNLNDYQVLAFLHSCVT			653	0.00199948	1	VDNKFSKEWYYASCQIVYLPNLNANQLPAFVCSLRD			653	0.00194769	1	VDNKFNKEWLAASVEICTLPNLNRGQGNAFVCSLTN							0.00219208	0.001		0.001	0.001		0.001	0.00293446		0.001	0.001
654	0.00119208	1	VDNKFTKEWSSAVNEIPILPNLNPIQMPAFLVSLSN			654	0.000833931	1	VDNKFTKEVPNASDQIFLLPNLNDYQVLAFLHSLRD			654	0.00199948	1	VDNKFSKEWSAAIVEIRCLPNLNRGQLDAFVASLGD			654	0.00194769	1	VDNKFNKEWLAASFQILSLPNLNQGQVPAFVGSLIN							0.00338416	0.001		0.001	0.00308121		0.001	0.001		0.001	0.00279459
655	0.00119208	1	VDNKFTKEWCTAYSQIRHLPNLNGCQIFAFVCSLDN			655	0.000833931	1	VDNKFTKEVPNASDQIFLLPNLNDYQVLAFLLSLRD			655	0.00199948	1	VDNKFSKEWSNAFSQIDSLPNLNPIQVGAFLSSLGD			655	0.00194769	1	VDNKFNKEWLAASDEILSLPNRQVSAFISSLCD							0.00219208	0.001		0.001	0.001		0.001	0.001		0.00294768	0.001
656	0.00119208	1	VDNKFTKEWFAAYPQISPLPNLNACQVDAFVSSLFD			656	0.000833931	1	VDNKFTKEVPNASDQIFLLPNLNDYQVLAFLDSLLN			656	0.00199948	1	VDNKFSKEWSNAIDEICFLPNLNACQGGAFVYSLDN			656	0.00194769	1	VDNKFNKEWLAASFEICRLPNLNPFQECAFVPSLDD							0.001	0.0026065		0.001	0.001		0.001	0.001		0.00294768	0.00458918
657	0.00119208	1	VDNKFTKELSYATRQISVLPNLNLGQRCAFVFSLRD			657	0.000833931	1	VDNKFTKEVPNASDQIFLLPNLNDYQVLAFVSSLTN			657	0.00199948	1	VDNKFSKEWCSASIEILNLPNLNVPQVGAFISSLAN			657	0.00194769	1	VDNKFNKEWLYASSQILTLPNLNGHQLPAFVCSLDD							0.0141129	0.0026065		0.001	0.001		0.001	0.00486892		0.001	0.001
658	0.00119208	1	VDNKFTKELSTAFCEIYFLPNLNVAQGNAFIISLFD			658	0.000833931	1	VDNKFTKEVPNASDQIFLLPNLNDYQVLAFVFSLYN			658	0.00199948	1	VDNKFSKELHDAVHQIFNLPNLNEPQVCAFVSSLFD			658	0.00194769	1	VDNKFNKEWLYASSQILTLPNLNGHQLPAFVCSLVD							0.00219208	0.001		0.0143429	0.0259745		0.001	0.00293446		0.001	0.001
659	0.00119208	1	VDNKFTKELIDAILEILSLPNLNPSQGDAFVISLIN			659	0.000833931	1	VDNKFTKEVPNASDQIFLLPNLNDYQVLAFLHSLRD			659	0.00199948	1	VDNKFSKELHDAVHQIFNLPNLNRDQRIAFIFSLFD			659	0.00194769	1	VDNKFNKEWLYATNQIIGLPNLNPCQGNAFIGSLRN							0.00934456	0.00421301		0.001	0.001		0.001	0.001		0.001	0.00279459
660	0.00119208	1	VDNKFTKELIAAASEIRVLPNLNLYQEIAFLGSLSD			660	0.000833931	1	VDNKFTKEVPNASDQIFLLPNLNDYQVLVFLHSLRD			660	0.00199948	1	VDNKFSKELHDAVHQIFNLPNLNDAQRIAFIFSLFD			660	0.00194769	1	VDNKFNKEWLYATREILRLPNLNGVQVSAFVDSLHN							0.001	0.0026065		0.00266786	0.001		0.001	0.001		0.00489537	0.001
661	0.00119208	1	VDNKFTKELLSAYSDFSSAELKRVPAACLHQQPAR			661	0.000833931	1	VDNKFTKEVPNASDQIFLLPNLNDYQVFAFLHSLRD			661	0.00199948	1	VDNKFSKELHDAVHQIFNLPNLNEHQRVAFVISLFD			661	0.00194769	1	VDNKFNKEWLYAIDQILCLPNLNGFQGPAFLGSLLD							0.00219208	0.001		0.001	0.00308121		0.001	0.001		0.001	0.001
662	0.00119208	1	VDNKFTKELLDASRQIVFLPNLNVYQIVAFIRSLDN			662	0.000833931	1	VDNKFTKEVPNASDQIFLLPNLNDSQVLAFLHSLRD			662	0.00199948	1	VDNKFSKELHDAVHQIFNLPNLNEHQVCAFVSSLFD			662	0.00194769	1	VDNKFNKEWLYAVIQICGLPNLNVVQQGAFVGSLHD							0.00219208	0.0026065		0.001	0.001		0.001	0.00293446		0.001	0.00279459
663	0.00119208	1	VDNKFTKELLYAFSEICHLPNLNGYQRSAFIPSLDD			663	0.000833931	1	VDNKFTKEVPNASDQIFLLPNLNEPQLSAFLASLGN			663	0.00199948	1	VDNKFSKELHDAVHQIFNLPNLNEPQVCAFVVSLCD			663	0.00194769	1	VDNKFNKEWLYAVIQICGLPNLNVGQGDAFVDSLSD							0.00219208	0.001		0.001	0.00516242		0.001	0.001		0.001	0.001
664	0.00119208	1	VDNKFTKELDAAIIQIAVLPNLNGIQQVAFVGSLSN			664	0.000833931	1	VDNKFTKEVPNASDQIFLLPNLNEVQERAFLHSLRD			664	0.00199948	1	VDNKFSKELHDAVHQIFNLPNLNEPQVCAFVVSLFD			664	0.00194769	1	VDNKFNKEWLYAVHEILCLPNLNHVQGSAFIDSLDD							0.00219208	0.001		0.001	0.001		0.001	0.001		0.001	0.001
665	0.00119208	1	VDNKFTKELDNAINEICSLPNLNVLQVNAFVGSLNN			665	0.000833931	1	VDNKFTKEVPNASDQIFLLPNLNDYQVLAFLHSLRD			665	0.00199948	1	VDNKFSKELHDAVHQIFNLPNLNEPQVCAFIFSLFD			665	0.00194769	1	VDNKFNKEWLYASNEIASLPNLNDFQQCAFVVSLDD							0.001	0.0026065		0.00266786	0.001		0.001	0.001		0.001	0.001
666	0.00119208	1	VDNKFTKELAYAIVELFACRT*TSFRRVPSYSA*LT			666	0.000833931	1	VDNKFTKEVPNASDQIFLLPNLNAGQIYAFLDSLSN			666	0.00199948	1	VDNKFSKELHDAVHQIFNLPNLNEPQVCAFVHSLYD			666	0.00194769	1	VDNKFNKEWLYASYQILSLPNLNVAQRPAFICSLVD							0.001	0.0026065		0.00266786	0.00516242		0.00299948	0.001		0.00294768	0.00279459
667	0.00119208	1	VDNKFTKELGAADDEILRLPNLNGNQRCAFVVSLFD			667	0.000833931	1	VDNKFTKEVPNASDQIFLLPNLNAVQRVAFIFSLGD			667	0.00199948	1	VDNKFSKELPDAIFEIFSLPNLNANQVIAFVCSLFD			667	0.00194769	1	VDNKFNKEWLYASSQILALPNLNGHQGRAFINSLHN							0.001	0.00421301		0.001	0.001		0.001	0.001		0.001	0.001
668	0.00119208	1	VDNKFTKELGAATVQIYCLPNLNRVQLCAFVRSLGN			668	0.000833931	1	VDNKFTKEVPNASDQIFLLPNLNGGQRDAFVISLNN			668	0.00199948	1	VDNKFSKELDTATIQITYLPNLNLPQQYAFILSLCN			668	0.00194769	1	VDNKFNKEWLSATNQILSLPNLNDSQGSAFVSSLFD							0.001	0.00421301		0.00433572	0.001		0.001	0.001		0.00489537	0.001
669	0.00119208	1	VDNKFTKELGDADAEIGPLPNLNVIQGSAFIRSLDN			669	0.000833931	1	VDNKFTKEVPNASDQIFLLPNLNVYQVLAFLHSLRD			669	0.00199948	1	VDNKFSKELYSAVCEIHFLPNLNVDQRHAFIFSLFD			669	0.00194769	1	VDNKFNKEWLSAIDQIARLPNLNDRQGNAFVDSLAD							0.001	0.0026065		0.001	0.001		0.001	0.001		0.001	0.00279459
670	0.00119208	1	VDNKFTKELGAAFFQINYLPNLNQNQVFAFVVSLYN			670	0.000833931	1	VDNKFTKEVPNASDQIFLLPNLNVSQIRAFVRSLCN			670	0.00199948	1	VDNKFSKELYSAVCEIHSLPNLNPSQRLAFIFSLFD			670	0.00194769	1	VDNKFNKEWLSATCEICRLPNLNPRQEIAFVCSLAN							0.001	0.0026065		0.001	0.001		0.001	0.00293446		0.00294768	0.001
671	0.00119208	1	VDNKFTKELVSATYEIRGLPNLNAGQLFAFLGSLVN			671	0.000833931	1	VDNKFTKEVPNASDQIFLLPNLNVTQVYAFLTSLRN			671	0.00199948	1	VDNKFSKELYSAVCEIHFLPNLNPSQRLAFIFSLFD			671	0.00194769	1	VDNKFNKEWLSATYQICDLPNLNVGQGLAFVHSLDR							0.00338416	0.00903252		0.001	0.001		0.001	0.001		0.001	0.00279459
672	0.00119208	1	VDNKFTKELYTAVREIVCLPNLNARQRVAFLGSLNN			672	0.000833931	1	VDNKFTKEVPNASDQIFLLPNLNVDQKLAFLSSLHD			672	0.00199948	1	VDNKFSKELYSAVCEIHFLPNLNPSQRLAFICSLFD			672	0.00194769	1	VDNKFNKEWLSAITEITRLPKLKRGPGMCLPMQPA*							0.001	0.0026065		0.001	0.001		0.001	0.001		0.001	0.001
673	0.00119208	1	VDNKFTKELCAATAQIR*SAELKPGSEGCLPSQPA*			673	0.000833931	1	VDNKFTKEVPNASDQIFLLPNLNVAQVNAFVGSLRN			673	0.00199948	1	VDNKFSKELYSAVCEIHFLPNLNPSQRLAFIFSLFE			673	0.00194769	1	VDNKFNKEWLSASREILCLPNLNLAQLVAFLPSLDD							0.00219208	0.001		0.00266786	0.00308121		0.001	0.001		0.001	0.001
674	0.00119208	1	VDNKFTKELCYAFRQIFPLPNLNHDQMAAFIYSLFD			674	0.000833931	1	VDNKFTKEVPNASDQIFLLPNLNDYQVLAFLHSLRD			674	0.00199948	1	VDNKFSKELYSAVCEIHFLPNLNDAQRIAFIFSLFD			674	0.00194769	1	VDNKFNKEWDNAIRQISSLPNLNGTQEGAFVPNLGD							0.001	0.0026065		0.001	0.001		0.001	0.001		0.00294768	0.001
675	0.00119208	1	VDNKFTKELCYASGQIFGLPNLNLYQETAFVVSLCN			675	0.000833931	1	VDNKFTKEVPNASDQIFLLPILNDYQVLAFLHSLRD			675	0.00199948	1	VDNKFSKELYSAVCEIHFLPNLNDYQRVAFIFSLFD			675	0.00194769	1	VDNKFNKEWDNAIVQILGLPNLNRFQMPAFLHSLNN							0.0069604	0.00903252		0.001	0.001		0.00299948	0.001		0.001	0.001
676	0.00119208	1	VDNKFTKELCYAFVQIRFLPNLNGDQEVAFIVSLHN			676	0.000833931	1	VDNKFTKEVPNASDQIFLLPDLNDYQVLAFLHSLRD			676	0.00199948	1	VDNKFSKELYSAVCEIHFLPNLNVDQRHAFIFSLFD			676	0.00194769	1	VDNKFNKEWDNATHEIISLPNLNGVQGNAFITSLAD							0.001	0.0026065		0.00266786	0.001		76.791	10.2536		0.001	0.001
677	0.00119208	1	VDNKFDKEVCDAYAQIGNLPNLNVYQIFAFVRSLAD			677	0.000833931	1	VDNKFTKEVPNASDQIFLLSNLNDYQVLAFLHSLRD			677	0.00199948	1	VDNKFSKELYSAVFEIHILPNLNPSQRLAFIFSLFD			677	0.00194769	1	VDNKFNKEWDNAIFEIGRLPNLNRDQEPAFVGSLCD							0.001	0.0026065		0.001	0.00308121		0.001	0.001		0.001	0.00279459
678	0.00119208	1	VDNKFYKEGTAAYHQISYLPNLNECQKCAFVVSLRD			678	0.000833931	1	VDNKFTKEVPNASDQIFLLPNLNDYQVLAFLHSLRD			678	0.00199948	1	VDNKFSKELYSAVFEIHILPNLNDYQRVAFIFSLFD			678	0.00194769	1	VDNKFNKEWDNAITQICNLPNLNVGQGAAFVISLGD							0.00219208	0.001		0.00433572	0.00932484		0.001	0.001		0.00294768	0.001
679	0.00119208	1	VDNKFYKEGRAAYDEIYSLPNLNGCQGVAFIVSLYN			679	0.000833931	1	VDNKFTKEVPNASDQIFFLPNLNDYQVLAFINSLRD			679	0.00199948	1	VDNKFSKELSDAVVQINGLPNLNRYQICAFIFSLND			679	0.00194769	1	VDNKFNKEWDNAISQICCLPNLNLDQETAFLHSLVN							0.00219208	0.001		0.00266786	0.001		0.00299948	0.001		0.001	0.001
680	0.00119208	1	VDNKFYKEGDYAAAQIPDLPNLNVCQIDAFLCSLDD			680	0.000833931	1	VDNKFTKEVPNASDQIFFLPNLNDYQVLAFLHSLRD			680	0.00199948	1	VDNKFSKELSYAFSEICDLPNLNDAQRIAFIFSLFD			680	0.00194769	1	VDNKFNKEWDNAVYQISLLPNLNGGQQDAFLGSLFD							0.001	0.0026065		0.00433572	0.00308121		0.00699844	0.001		0.001	0.00279459
681	0.00119208	1	VDNKFYKEGANADAEIGSLPNLNGCQMHAFLFSLAD			681	0.000833931	1	VDNKFTKEVPNASDQFFLLPNLNDYQVLAFLHSLRD			681	0.00199948	1	VDNKFSKELCTAVCEIGSLPNLNADQENAFVYSLDD			681	0.00194769	1	VDNKFNKEWDNAVYQICSLPNLNPSQGPAFISSLVD							0.00338416	0.001		0.001	0.00308121		0.73081	0.155757		0.00294768	0.00279459
682	0.00119208	1	VDNKFYKEGAAAIGQIGVLPNLNGGQMGAFVRSLSD			682	0.000833931	1	VDNKFTKEVPNASDHIFLLPNLNDYQVLAFLHSLRD			682	0.00199948	1	VDNKFSKELCDAIHEIHFLPNLNPSQRLAFIFSLFD			682	0.00194769	1	VDNKFNKEWDNASVQICRLPNLNQVQEYAFVLSLGN							0.00576832	0.00421301		0.001	0.001		0.00299948	0.001		0.001	0.001
683	0.00119208	1	VDNKFYKEGAYANCQITGLPNLNVYQIVAFIRSLDN			683	0.000833931	1	VDNKFTKEVPNASDQIFLLPNLNDYQVLAFLHSLRD			683	0.00199948	1	VDNKFSKELCDAIHEIHFLPNLNDAQRIAFIFSLFD			683	0.00194769	1	VDNKFNKEWDTAVGEILALPNLNPSQGNAFVPSLVN							0.00219208	0.001		0.00266786	0.001		0.001	0.00293446		0.001	0.001
684	0.00119208	1	VDNKFYKEGYYAVGQILLLPNLNATQRTAFITSLFD			684	0.000833931	1	VDNKFTKEVPNASDLIFLLPNLNDYQVLAFLHSLRD			684	0.00199948	1	VDNKFSKELCDAIVEIHFLPNLNVDQRHAFIFSLFD			684	0.00194769	1	VDNKFNKEWDTAVREILVLPNLNAIQGNAFVSSLVD							0.001	0.0026065		0.001	0.001		0.001	0.001		0.001	0.001
685	0.00119208	1	VDNKFYKEGSNATVQISSLPNLNAAQGDAFVPSLAD			685	0.000833931	1	VDNKFTKEVPNASDEIFLLPNLNDYQVLAFLHSLRD			685	0.00199948	1	VDNKFSKELFSADFQIVNLPNLNVDQRRAFLYSLDD			685	0.00194769	1	VDNKFNKEWDTAVLEICCLPNLNESQGGAFVDSLRD							0.00457624	0.001		0.001	0.001		0.00299948	0.001		0.001	0.001
686	0.00119208	1	VDNKFYKEGCYADTEIYPLPNLNARQKPAFLVSLCD			686	0.000833931	1	VDNKFTKEVPNASD*IFLLPNLNEDQELAFVISLNN			686	0.00199948	1	VDNKFFKEVVDATIEIHYLPNLNRDQKCAFIFSLFD			686	0.00194769	1	VDNKFNKEWDTASSQILSLPNLNPCQIVAFVSSLGD							0.001	0.0026065		0.001	0.001		0.001	0.00293446		0.001	0.001
687	0.00119208	1	VDNKFYKEGCTADRQIVALPNLNLGQESAFVGSLVD			687	0.000833931	1	VDNKFTKEVPNAFDQIFLLPNLNDYQVLAFLHSLRD			687	0.00399896	2	VDNKSSKEVVDATIEIHYLPNLNRDQKCAFIFSLFD			687	0.00194769	1	VDNKFNKEWDTATAQILGLPNLNESQGSAFILSLYD							0.001	0.0026065		0.001	0.001		0.001	0.001		0.00294768	0.001
688	0.00119208	1	VDNKFYKEGCTASTEINNLPNLNARQVIAFLGSLFN			688	0.000833931	1	VDNKFTKEVPNVSDQIFLLPNLNLSQERAFIISLNN			688	0.00399896	2	VDNKFSKEVCDAIHEIHFLPNLNDAQRIAFIFSLFD			688	0.00194769	1	VDNKFNKEWDTASRQIITLPNLNRGQGSAFVDSLAN							0.00219208	0.001		0.001	0.001		0.001	0.001		0.001	0.001
689	0.00119208	1	VDNKFYKEGCSAFSEIGTLPNLNEYQKYAFVVSLHN			689	0.000833931	1	VDNKFTKEVPNASDQIFLLPNLNDYQVLAFLHSLRD			689	0.00399896	2	VDNKFNKEVCDAYAQIGNLPNLNVYQIVAFIFSLFD			689	0.00194769	1	VDNKFNKEWDDAIFEICRLPNLNEFQECAFLCSLND							0.00219208	0.001		0.001	0.00308121		0.001	0.001		0.001	0.001
690	0.00119208	1	VDNKFYKEGFDADGQIDPLPNLNVSQMVAFVVSLSD			690	0.000833931	1	VDNKFTKEVPSASDQIFLLPNLNDYQVLAFLHSLRD			690	0.00399896	2	VDNKFNKEVCDAYAQIGNLPNLNVYQIVAFIRSLFD			690	0.00194769	1	VDNKFNKEWDDAASQIVGLPNLNADQQCAFVGSLHD							0.00219208	0.00421301		0.001	0.001		0.00299948	0.001		0.001	0.00279459
691	0.00119208	1	VDNKFYKEVNYATSQIRCLPNLNVPQGYAFIVSLDN			691	0.000833931	1	VDNKFTKEVPYASDQIFLLPNLNDYQVLAFLHSLRD			691	0.00399896	2	VDNKFNKEVCDAYAQIGNLPNLNVDQILAFVLSLDN			691	0.00194769	1	VDNKFNKEWDDASVQIASLPNLNPVQGAAFISSLGN							0.001	0.0026065		0.00266786	0.00932484		0.001	0.00293446		0.001	0.001
692	0.00119208	1	VDNKFYKEVTNAIHQIFDLPNLNASQILAFVHSLTN			692	0.000833931	1	VDNKFTKEVANASDQIFLLPNLNDYQVLAFLHSLRD			692	0.00399896	2	VDNKFNKELVDAIFEIFVLPNLNDAQRIAFIFSLFD			692	0.00194769	1	VDNKFNKEWDDATRQISALQNLNVSQGPAFPSSLIN							0.00219208	0.001		0.001	0.001		0.00299948	0.001		0.00294768	0.00458918
693	0.00119208	1	VDNKFYKEVTTADREISALPNLKRGPGGCLRLQPA*			693	0.000833931	1	VDNKFTKEVGNAFCQISRLPNLNGAQGRAFVRSLCN			693	0.00399896	2	VDNKFNKEVNDADFQILLLPNLNACQLYAFIYSLCN			693	0.00194769	1	VDNKFNKEWDDAAAQILTLPNLNVVQGFAFLRSLGD							0.00219208	0.001		0.001	0.001		0.001	0.001		0.00294768	0.001
694	0.00119208	1	VDNKFYKEVSNAIAQINGLPNLNVIQMLAFVVSLCN			694	0.000833931	1	VDNKFTKEVFNAAFEIVSLPNLNDYQVLAFLHSLRD			694	0.00399896	2	VDNKFNKEVVSAYFEISFLPNLNQDQGCAFLCSLRD			694	0.00194769	1	VDNKFNKEWDDAVRQILNLPNLNRPQVDAFVGSLSD							0.00219208	0.001		0.00266786	0.00516242		0.001	0.001		0.001	0.001
695	0.00119208	1	VDNKFYKEVSDAIGQIIYLPNLNRGQGDAFVSSLYN			695	0.000833931	1	VDNKFTKEVPNSSDQIFLLPNLNDYQVLAFLHSLRD			695	0.00399896	2	VDNKFNKEWADAIVQIHYLPNLNPCQKVAFIFSLFD			695	0.00194769	1	VDNKFNKEWDDASGEICALPNLNEYQERAFVVSLSD							0.001	0.00421301		0.001	0.001		0.001	0.001		0.001	0.00279459
696	0.00119208	1	VDNKFYKEVIYDPIKFVACRT*TPVREAPSLAA*LM			696	0.000833931	1	VDNKFTKEWHAASVEIAFLPNLNGGQMAAFVDSLGN			696	0.00399896	2	VDNKFNKELYSAIYEIFSLPNLNLDQVIAFVISLFD			696	0.00194769	1	VDNKFNKEWDAATRQICFLPNLNVGQGSAFLCSLSN							0.0069604	0.00581951		0.001	0.001		0.001	0.001		0.001	0.001
697	0.00119208	1	VDNKFYKEVLAAFGEISDLPNLNPLQLFAFLDSLGN			697	0.000833931	1	VDNKFTKEWHSAVAEILTLPNLNGGQGYAFVASLHD			697	0.00399896	2	VDNKFTKEVPDAIREIFILPNLNRDQKCAFIFSLFD			697	0.00194769	1	VDNKFNKEWDAAAIQICRLPNLNGGQEAAFVGSLSN							0.00338416	0.001		0.00266786	0.001		0.001	0.00293446		0.001	0.001
698	0.00119208	1	VDNKFYKEVDYAFVQIINLPNLNVIQQNAFLSSLDN			698	0.000833931	1	VDNKFTKEWDYAAFQICGLPNLNVRQGLAFVPSLDD			698	0.00399896	2	VDNKFTKEVPDAIREIFILPNLNDAQRIAFIFSLFD			698	0.00194769	1	VDNKFNKEWDAAVSQIFRLPNLNRGQLYAFVRSLCN							0.00219208	0.001		0.001	0.001		0.001	0.001		0.001	0.00279459
699	0.00119208	1	VDNKFYKEVANAFHEIVCLPNLNLYQGGAFVNSLFN			699	0.000833931	1	VDNKFTKEWADATGEICRLPNLNVSQGCAFLSSLDD			699	0.00399896	2	VDNKFTKEVPNASDQIFLLPNLNLSQERAFIISLNN			699	0.00194769	1	VDNKFNKEWDAAVHQILGLPNLNGCQLCAFVPSLYD							0.001	0.0026065		0.00266786	0.001		0.001	0.001		0.001	0.00279459
700	0.00119208	1	VDNKFYKEVASATIEIGSLPNLNVGQEVAFVNSLVN			700	0.000833931	1	VDNKFTKEWADASIQITDLPNLNGGQGIAFVSSLVD			700	0.00399896	2	VDNKFTKEVCET			700	0.00194769	1	VDNKFNKEWDAAVDQILGLPNLNGAQKPAFVCSLSN							0.00219208	0.001		0.001	0.001		0.00499896	0.001		0.001	0.001
701	0.00119208	1	VDNKFYKEVVYAFDEIFGLPNLNRPQESAFVNSLTN			701	0.000833931	1	VDNKFTKEWADASIQILDLPNLNEVQGVAFVDSLVD			701	0.00399896	2	VDNKFTKEWLYAFCQINPLPNLNVSQEFAFLCSLCD			701	0.00194769	1	VDNKFNKEWDAASLEILVLPNLNDIQGVAFIPSLSD							0.00219208	0.001		0.001	0.00308121		0.001	0.0184101		0.00294768	0.001
702	0.00119208	1	VDNKFYKEVVTAFSEIRTLPNLNEYQGLAFVVSLCN			702	0.000833931	1	VDNKFTKEWFYATCQIISLPNLNEFQKNAFLFSLYD			702	0.00399896	2	VDNKFTKEGYYAIPSSTAWLM			702	0.00194769	1	VDNKFNKEWDAATDQICCLPNLNLSQQGAFICSLGN							0.00457624	0.001		0.00433572	0.001		0.001	0.001		0.001	0.001
703	0.00119208	1	VDNKFYKEVVYAFDEINVLPNLNLGQGCAFVDSLDN			703	0.000833931	1	VDNKFTKELNDAAYQIATLPNLNEVQERAFVNSLFD			703	0.00399896	2	VDNKFTKEVDSAVFEIHILPNLNDYQKCAFIFSLFD			703	0.00194769	1	VDNKFNKEWDAATYEICNLPNLNQLQEGAFILSLND							0.00219208	0.001		0.001	0.001		0.001	0.001		0.00294768	0.001
704	0.00119208	1	VDNKFYKEVYSAFVEIGNLPNLNGFQKAAFVCSLNN			704	0.000833931	1	VDNKFTKELPNASDQIFLLPNLNDDQVLAFINSLRN			704	0.00399896	2	VDNKFTKEVDSAVFEIHILPNLNDYQRHAFIFSLFD			704	0.00194769	1	VDNKFNKEWDAAIGQILYLPNLNGCQEAAFVSSLDN							0.001	0.00421301		0.012675	0.00308121		0.001	0.00293446		0.001	0.00279459
705	0.00119208	1	VDNKFYKEVYNADAEIPVLPNLNQCQLRAFVNSLRN			705	0.000833931	1	VDNKFTKELCSAADEIFVLPNLNLSQERAFIISLNN			705	0.00399896	2	VDNKFTKEVDSAVFEIHILPNLNVDQRHAFIFSLFD			705	0.00194769	1	VDNKFNKEWDAAIDEICCLPNLNGFQGDAFLVSLDN							0.030802	0.010639		0.001	0.001		0.00299948	0.001		0.0302153	0.00279459
706	0.00119208	1	VDNKFYKEVCNAAHEIISLPNLNVYQIVAFIRSLDN			706	0.000833931	1	VDNKFTKELCSAADEIFVLPNLNDDQVLAFIISLNN			706	0.00399896	2	VDNKFTKEVDSAVFEIHFLPNLNPSQRLAFIFSLFD			706	0.00194769	1	VDNKFNKEWDAAVAEICDLPNLNGPQESAFVRSLDN							0.00457624	0.00421301		0.00433572	0.001		0.001	0.001		0.00489537	0.001
707	0.00119208	1	VDNKFYKEVCDAYAQIGNLPNLNVYQIVAFIDSLCD			707	0.000833931	1	VDNKFTKELCSAADEIFVLPNLNDDQVLAFINSLRD			707	0.00399896	2	VDNKFTKEVVDATIEIHYLPNLNRDQKCAFIFSLFD			707	0.00194769	1	VDNKFNKEWDAAVRQIGTLPNLNHSQEIAFIGSLGD							0.00219208	0.001		0.00433572	0.00308121		0.001	0.001		0.001	0.00279459
708	0.00119208	1	VDNKFYKEVCAADVQICDLPNLNRDQRGAFVCSLDN			708	0.000833931	1	VDNKFTKELCSAADEIFVLPNLNDDQVLAFLHSLRD			708	0.00399896	2	VDNKFPKEVVDATIEIHYLPNLNRDQKCAFIFSLFD			708	0.00194769	1	VDNKFNKEWDAASIQIVALPNLNVGQGSAFLNSLYN							0.001	0.0026065		0.001	0.00308121		0.001	0.001		0.001	0.001
709	0.00119208	1	VDNKFYKEVCDAYAQIGNLPNLNVYQIVAFIRSLDN			709	0.000833931	1	VDNKFTKELCSAADEIFVLPNLNDDQVLAFLHSLRD			709	0.00399896	2	VDNKFPKEVCDAIHEIHFLPNLNDAQRIAFIFSLFD			709	0.00194769	1	VDNKFNKEWDAASLQIRRLPNLNGVQVAAFVNSLGD							0.00219208	0.001		0.001	0.00308121		0.00299948	0.001		0.001	0.00279459
710	0.00119208	1	VDNKFYKEWNDADTEIDCLPNLNANQVGAFVVSLCN			710	0.000833931	1	VDNKFTKELFNAAFEIVRLPNLNLSQERAFIISLNN			710	0.00399896	2	VDNKFYKEVGTAVAEIHFLPNLNQVQRVAFIFSLFD			710	0.00194769	1	VDNKFNKEWDYAARQICLLPNLNLVQEIAFVGSLVN							0.00219208	0.001		0.001	0.001		0.00499896	0.00680338		0.001	0.001
711	0.00119208	1	VDNKFYKEWNDASRQIVNLPNLNESQGYAFVSSLSN			711	0.000833931	1	VDNKFTKELFNAAFEIVSLPNLNDYQVLAFLHSLRD			711	0.00399896	2	VDNKFYKEWCAASSEIVCQTRTR*TPSSLA*MT			711	0.00194769	1	VDNKFNKEWDYAANQILTLPNLNAVQEAAFVLSLGD							0.00219208	0.001		0.001	0.001		0.001	0.00293446		0.00294768	0.001
712	0.00119208	1	VDNKFYKEWNSATSQICSLPNLNLAQKRAFVHSLGD			712	0.000833931	1	VDNKFTKEVPNASDQIFLLPNLNDDQVLAFINSLRN			712	0.00399896	2	VDNKFYKELAYAIHEIFCLPNLNDAQRIAFIFSLFD			712	0.00194769	1	VDNKFNKEWDYAVTQICDLPNLNGIQGYAFIDSLFN							0.00338416	0.001		0.00266786	0.001		0.0889771	0.945017		0.001	0.00279459
713	0.00119208	1	VDNKFYKEWIDASSQILHLPNLNGFQEAAFVTSLSN			713	0.000833931	1	VDNKFTKDVPNASDQIFLLPNLNDYQVLAFLHSLRD			713	0.00399896	2	VDNKFYKELAYAIHEIFCLPNLNEPQVCAFVVSLFD			713	0.00194769	1	VDNKFNKEWDYASIEICGLPNLNLFQEFAFVNSLSD							0.001	0.0026065		0.00266786	0.00308121		0.001	0.001		0.001	0.00279459
714	0.00119208	1	VDNKFYKEWISASGQIDSLPNLNGHQEVAFLYSLFD			714	0.000833931	1	VDNKFTKGVPNASDQIFLLPNLNDYQVLAFLHSLRD			714	0.00399896	2	VDNKFYKELASAVAQICDLPNLNPSQEYAFVYSLFD			714	0.00194769	1	VDNKFNKEWDYASRQIICLPNLNVVQECAFVTSLYD							0.001	0.0026065		0.00266786	0.00308121		0.001	0.00680338		0.001	0.00279459
715	0.00119208	1	VDNKFYKEWRNAAHQIVSLPNLNPIQGRAFLHSLGD			715	0.000833931	1	VDNKFTK*VPNASDQIFLLPNLNDYQVLAFLHSLRD			715	0.00399896	2	VDNKFYKELYTAIYEIFVLPNLNRDQKCAFIFSLFD			715	0.00194769	1	VDNKFNKEWDYASAQIVNLPNLNAYQGCAFIHSLRD							0.001	0.0026065		0.00433572	0.001		0.001	0.0106723		0.00489537	0.00279459
716	0.00119208	1	VDNKFYKEWLSASNEIISLPNLNAAQITAFIGSLPN			716	0.000833931	1	VDNKFTKEVPNASDQIFLLPNLNDYQVLAFLHSLRD			716	0.00399896	2	VDNKFYKELYTAIYEIFVLPNLNANQVIAFVCSLFD			716	0.00194769	1	VDNKFNKEWDYASSQICSLPNLNERQEDAFICSLYD							0.00219208	0.0026065		0.001	0.00308121		0.00499896	0.00293446		0.001	0.001
717	0.00119208	1	VDNKFYKEWLYAACEIGYLPNLNVYQIVAFIRSLDN			717	0.000833931	1	VDNKFTKEVINAYYELIPCRT*TSARCTPSYPACTT			717	0.00399896	2	VDNKFYKELCSAADEIFVLPNLNDDQVLAFINSLRN			717	0.00194769	1	VDNKFNKEWDYATIQILYLRT*TSPSGAPSYAAWSM							0.00219208	0.001		0.0210143	0.011406		0.001	0.00486892		0.001	0.001
718	0.00119208	1	VDNKFYKEWDAASSQIVGLPNLNGYQVRAFVGSLGD			718	0.000833931	1	VDNKFTKEVDSAVFEIHILPNLNDYQRVAFIFSLFD			718	0.00399896	2	VDNKFYKEWLSPSLTA*IM			718	0.00194769	1	VDNKFNKEWDYATGQILDLPNLNLGQEYAFLGSLDN							0.001	0.0026065		0.001	0.001		0.001	0.00293446		0.001	0.001
719	0.00119208	1	VDNKFYKEWDAAAPQIANLPNLNAPQIGAFVFSLDN			719	0.000833931	1	VDNKFTKEWTNASFQILHLPNLNDIQVNAFLSSLVN			719	0.00399896	2	VDNKFYKELSTAVYEIFALPNLNESQVVAFVVSLFD			719	0.00194769	1	VDNKFNKEWDYAVSQITALPNLNHVQEDAFLCSLGD							0.001	0.00421301		0.001	0.001		0.001	0.00293446		0.001	0.001
720	0.00119208	1	VDNKFYKEWADASFEICGLPNLNVDQEFAFVCSLIN			720	0.000833931	1	VDNKFTKEWSYANLQIHCLPNLNRFQRHAFVCSLVD			720	0.00399896	2	VDNKFYKELPDAIHEIHFLPNLNDAQRIAFIFSLFD			720	0.00194769	1	VDNKFNKEWDYAVLQICALPNLNRTQVSAFVARPVQ							0.00219208	0.001		0.001	0.001		0.001	0.001		0.001	0.001
721	0.00119208	1	VDNKFYKEWGNANGEITALPNLNPCQLPAFLRSLSN			721	0.000833931	1	VDNKFTKEWRYASVQILNLPNLNHVQVNAFVSSLVD			721	0.00399896	2	VDNKFYKELPDAIFEIFSLPNLNRDQKCAFIFSLFD			721	0.00194769	1	VDNKFNKEWDYASREICDLPNLNRGQEFAFIPSLRD							0.001	0.00742601		0.001	0.001		0.001	0.00293446		0.00294768	0.001
722	0.00119208	1	VDNKFYKEWVYASLEISCLPNLNLAQVDAFVRSLHD			722	0.000833931	1	VDNKFTKEWLAAVDQIIILPNLNDYQVLAFLHSLRD			722	0.00399896	2	VDNKFYKELPDAIFEIFSLPNLNANQVIAFVCSLFD			722	0.00194769	1	VDNKFNKEWDYASLQILLLPNLNEYQECAFVASLGD							0.00219208	0.001		0.001	0.00308121		0.001	0.00293446		0.001	0.00458918
723	0.00119208	1	VDNKFYKEWVDATSEICDLPNLNELQGSAFLASLCD			723	0.000833931	1	VDNKFTKEWDDAIAQICRLPNLNGVQKGAFVSSLPD			723	0.00399896	2	VDNKFYKELFNAIYEIFGLPNLNERQVVAFICSLFD			723	0.00194769	1	VDNKFNKEWDYASNQILALPNLNHAQGDAFVTSLFN							0.001	0.0026065		0.001	0.001		0.001	0.001		0.001	0.001
724	0.00119208	1	VDNKFYKEWSSAIVEILALPNLNVRQMPAFICSLAD			724	0.000833931	1	VDNKFTKEWDSASYEIINLPNLNGSQMGAFLSSLSD			724	0.00399896	2	VDNKFSKEGIDAFVEICDLPNLNGFQQYAFIFSLGD			724	0.00194769	1	VDNKFNKEWDYASSQICILPNLNASQGVAFLCSLGD							0.00576832	0.00903252		0.001	0.001		0.001	0.001		0.001	0.001
725	0.00119208	1	VDNKFYKEWCYATNEICPLPNLNECQRHAFVCSLGN			725	0.000833931	1	VDNKFTKEWGNAVCQIIILPNLNASQGFAFVYSLVN			725	0.00399896	2	VDNKFSKEVPDAIREIFILPNLNESQVVAFVVSLFD			725	0.00194769	1	VDNKFNKEWDSASLQISGLPNLNLVQGASFLDSLHD							0.001	0.0026065		0.001	0.00516242		0.001	0.001		0.001	0.001
726	0.00119208	1	VDNKFYKEWCSAVHEISSLPNLNGLQEGAFIPSLVD			726	0.000833931	1	VDNKFTKELHNAVFQILHLPNLNELQEIAFVNSLLN			726	0.00399896	2	VDNKFSKEVDSAVFEIHILPNLNRDQKCAFIFSLFD			726	0.00194769	1	VDNKFNKEWDSASAQIASLPNLNHFQEDAFVGSLYD							0.00219208	0.001		0.00433572	0.00724363		0.001	0.001		0.0185292	0.00458918
727	0.00119208	1	VDNKFYKEWCNAFSQICHLPNLNRVQGGAFICSLGD			727	0.000833931	1	VDNKFSKEVPNASDQIFLLPNLNDYQVLAFLHSLRD			727	0.00399896	2	VDNKFSKEVDSAVFEIHILPNLNDYKRVAFIFSLFD			727	0.00194769	1	VDNKFNKEWDSASVEILALPNLSLHTQPA*							0.001	0.00421301		0.00266786	0.001		0.001	0.001		0.00489537	0.001
728	0.00119208	1	VDNKFYKEWCTAVDEILPLPNLNHPQGSAFLHSLRD			728	0.000833931	1	VDNKFIKEVPNASDQIFLLPNLNDYQVLAFLHSLRD			728	0.00399896	2	VDNKFSKEVDSAVFEIHILPNLNDYQRVAFIFSLFD			728	0.00194769	1	VDNKFNKEWDSASCEICALPNLNANQEVAFLDSLCN							0.0200733	0.0154585		0.00433572	0.00724363		0.00299948	0.001		0.001	0.00279459
729	0.00119208	1	VDNKFYKEWCAAVAQISDLPNLNDNQGGAFVCSLYN			729	0.000833931	1	VDNKFYKEGNDAAYQIDHLPNLNVFQRIAFVYSLFD			729	0.00399896	2	VDNKFSKEVADATIEIHYLPNLNRDQKCAFIFSLFD			729	0.00194769	1	VDNKFNKEWDNATVEICDLPNLNEGQEGAFVNSLCN							0.00219208	0.001		0.001	0.001		0.001	0.001		0.00294768	0.001
730	0.00119208	1	VDNKFYKEWCAASSEIVCQTRTR*TPSSLA*MT			730	0.000833931	1	VDNKFYKEGTSAFSEICNLPNLNAFQQRAFIHSLSN			730	0.00399896	2	VDNKFSKEVGTAVAEIHFLPNLNQVQRVAFIFSLFD			730	0.00194769	1	VDNKFNKEWDNATSEIACLPNLNGAQGLAFLYSLRD							0.001	0.00421301		0.00266786	0.001		0.001	0.001		0.001	0.00279459
731	0.00119208	1	VDNKFYKEWCSAYCQIVDLPNLNLAQESAFVRSLTD			731	0.000833931	1	VDNKFYKEGPYAVLQISALPNLNPCQVCAFVRSLAN			731	0.00399896	2	VDNKFSKEVVDATIEIHYLPNLNRDQKCAFIFSLFD			731	0.00194769	1	VDNKFNKEWDNAAVQILSLPNLNRLQGNAFIFSLGN							0.00219208	0.001		0.001	0.00308121		0.001	0.0106723		0.001	0.00638377
732	0.00119208	1	VDNKFYKEWFYATNEISRLPNLNGGQESAFVRSLIN			732	0.000833931	1	VDNKFYKEVPNASDQIFLLPNLNLSQERAFIISLNN			732	0.00399896	2	VDNKFSKEVVDATIETHYLPNLNRDQKCAFIFSLFD			732	0.00194769	1	VDNKFNKEWDNAVAEIALLPNLNVGQEGAFLSSLAD							0.001	0.00421301		0.00266786	0.001		0.001	0.001		0.00294768	0.001
733	0.00119208	1	VDNKFYKECTNANDEIPVLPNLNETQRTAFLDSLSD			733	0.000833931	1	VDNKFYKEVYYAFFEILTLPNLNDIQRTAFIGSLRN			733	0.00399896	2	VDNKFSKEVVDATIEIHHLPNLNRDQKCAFIFSLFD			733	0.00194769	1	VDNKFNKEWDNAVSQICSLPNLNGIQEFAFVGSLGD							0.001	0.00421301		0.00266786	0.00724363		0.001	0.001		0.001	0.001
734	0.00119208	1	VDNKFYKELNDAYYQIVSLPNLNAIQVCAFICSLCN			734	0.000833931	1	VDNKFYKEWNYAIRQISGLPNLNVDQGDAFVYSLVD			734	0.00399896	2	VDNKFSKEVVDATIEIHYLPNLNQVQRVAFIFSLFD			734	0.00194769	1	VDNKFNKEWDNAVVQILLLPNLNAGQGHAFVVSLSD							0.00219208	0.001		0.00266786	0.001		0.001	0.001		0.001	0.00279459
735	0.00119208	1	VDNKFYKELSYAYVEILYLPNLNLVQLLAFIFSLNN			735	0.000833931	1	VDNKFYKEWSAASAQIVLLPNLNGSQQCAFVGSLHN			735	0.00399896	2	VDNKFSKEVVDATIEIHYLPNLNPSQRLAFIFSLFD			735	0.00194769	1	VDNKFNKEWDNAVVEIYNLPNLNGVQERAFLSSLIN							0.00219208	0.001		0.00600359	0.0134873		0.001	0.00293446		0.001	0.001
736	0.00119208	1	VDNKFYKELIYAFAQICTLPNLNRLQKVAFLHSLGN			736	0.000833931	1	VDNKFYKEWIDASYQISTLPNLNLTQGSAFVCSLPD			736	0.00399896	2	VDNKFSKEVVDATIEIHYLPNLNRDQKCAFIFSLFD			736	0.00194769	1	VDNKFNKEWDNASNEICLLPNLNRRQGVAFLGSLAN							0.001	0.0026065		0.001	0.001		0.001	0.00293446		0.001	0.001
737	0.00119208	1	VDNKFYKELPTAYSQIRILPNLNQAQLVAFITSLSN			737	0.000833931	1	VDNKFYKEWHAASVQICSLPNLNLFQEDAFVFSLSD			737	0.00399896	2	VDNKFSKEVVDATIEIHYLPNLNRDQKCTFIFSLFD			737	0.00194769	1	VDNKFNKEWDNATYEICSLPNLNEPQVDAFVSSLPD							0.00219208	0.001		0.001	0.001		0.001	0.001		0.00294768	0.001
738	0.00119208	1	VDNKFYKELPSAIFEINLLPNLNRGQGRAFIVSLWD			738	0.000833931	1	VDNKFYKEWRNAVHEICDLPNLNLGQVPAFVASLGN			738	0.00399896	2	VDNKFSKEVVDATIEIHYLPNLNRDQKCALIFSLFD			738	0.00194769	1	VDNKFNKEWDNATSEILSLPNLNVSQGGAFISSLRN							0.00219208	0.001		0.001	0.001		0.00699844	0.00873784		0.001	0.001
739	0.00119208	1	VDNKFYKELLDASSEIDTLPNLNLSQVIAFLISLCD			739	0.000833931	1	VDNKFYKEWRAAFPQIDNLPNLNRVQGPAFLASLRD			739	0.00399896	2	VDNKFSKEVVDATIEIHYLPNLNRDQKCAFIFSLFN			739	0.00194769	1	VDNKFNKEWDNAIVEILALPNLNDTQECAFLFSLGD							0.001	0.0026065		0.00266786	0.001		0.00299948	0.001		0.001	0.001
740	0.00119208	1	VDNKFYKELDNANIQISILPNLNRCQRFAFINSLID			740	0.000833931	1	VDNKFYKEWRSAAYQICILPNLNEGQEIAFVRSLSD			740	0.00399896	2	VDNKFSKEVVDATIEIHYLPNLNRDQKCAFIFSLLD			740	0.00194769	1	VDNKFNKEWDNAIVEILALPNLNVHQGHAFVSSLAN							0.00815248	0.001		0.001	0.001		0.001	0.00293446		0.001	0.00279459
741	0.00119208	1	VDNKFYKELASAVLEICFLPNLNPSQMAAFIRSLGD			741	0.000833931	1	VDNKFYKEWDYASYQICNLPNLNDFQIGAFIPSLYN			741	0.00399896	2	VDNKFSKEVVDATIEIHYLPNLNRDQKCAFVVSLFN			741	0.00194769	1	VDNKFNKEWDNAICQILALPNLNPCQEFAFLRSLPN							0.00457624	0.001		0.00266786	0.001		0.001	0.00293446		0.001	0.00279459
742	0.00119208	1	VDNKFYKELGTADYEIASLPNLNRDQRYAFIASLSN			742	0.000833931	1	VDNKFYKEWDSAVHEIVALPNLNEFQEVAFLDSLDD			742	0.00399896	2	VDNKFSKEVVDATIEIHYLPNLNRDQKCAFVSSLFD			742	0.00194769	1	VDNKFNKEWDNAVAEICGLPNLNEGQGAAFVCSLID							0.00219208	0.001		0.001	0.001		0.001	0.001		0.001	0.00279459
743	0.00119208	1	VDNKFYKELGSAFFEICVLPNLNEAQMAAFVYSLRD			743	0.000833931	1	VDNKFYKEWATASDQILFLPNLNVDQKCAFVASLDD			743	0.00399896	2	VDNKFSKEVVDATIEIHYLPNLNRDQRHAFIFSLFD			743	0.00194769	1	VDNKFNKEWDNAVAEICSLPNLNAVQGPAFICSLHD							0.00338416	0.001		0.001	0.00308121		0.001	0.001		0.001	0.001
744	0.00119208	1	VDNKFYKELVDAFCQIFSLPNLNHPQRAAFLCSLCD			744	0.000833931	1	VDNKFYKEWCNAFPEIRALPNLNRDQECAFLNSLGD			744	0.00399896	2	VDNKFSKEVVDATIEIHYLPNLNRDQRHAFIFSLFD			744	0.00194769	1	VDNKFNKEWDNAVIQIVNLPNLNLYQETAFIDSLCD							0.00338416	0.001		0.001	0.00308121		0.001	0.001		0.001	0.00817836
745	0.00119208	1	VDNKFYKELYTAIYEIFVLPNLNESQIIAFVNSLFD			745	0.000833931	1	VDNKFYKELNYANVEITDRRT*TAIRELPSLAA*VM			745	0.00399896	2	VDNKFSKEVVDATIEIHYLPNLNRDQECAFIFSLFD			745	0.00194769	1	VDNKFNKEWDNAVLQICSLPNLNVFQECAFIASLPN							0.0069604	0.00742601		0.001	0.001		0.001	0.001		0.001	0.00458918
746	0.00119208	1	VDNKFYKELSTAIYEICVLPNLNRIQMNAFVFSLHD			746	0.000833931	1	VDNKFYKELCSAANEIFVLPNLNDYQVLAFLHSLRD			746	0.00399896	2	VDNKFSKEVVDATIEIHYLPNLNRDRKCAFIFSLFD			746	0.00194769	1	VDNKFNKEWDNAVSQILVLPNLNRAQRVAFVSSLCN							0.00219208	0.001		0.001	0.001		0.001	0.001		0.001	0.001
747	0.00119208	1	VDNKFYKELCTASLQISGLPNLNVYQIVAFIRSLDN			747	0.000833931	1	VDNKFYKELCSAADEIFILPNLNDYQVLAFLHSLRD			747	0.00399896	2	VDNKFSKEVVDATIEIHYLPNLNRDQKCAFIFSLFD			747	0.00194769	1	VDNKFNKEWDNASIEICRLPNLNAIQGCAFLGSLAN							0.001	0.0026065		0.001	0.001		0.001	0.001		0.00294768	0.001
748	0.00119208	1	VDNKFYKELFTATGEIFTLPNLNHGQEYAFLISLFN			748	0.000833931	1	VDNKFYKELCSAADEIFVLPNLNDDQVLAFINSLRN			748	0.00399896	2	VDNKFSKEVVDATIEIHYLPNLNRYQKCAFIFSLFD			748	0.00194769	1	VDNKFNKEWDNASREICSLPNLNRAPEACLRRQPDQ							0.00338416	0.001		0.001	0.001		0.001	0.001		0.001	0.00279459
749	0.00119208	1	VDNKFYKELFDAFCQIYSLPNLNLNQRGAFLCSLID			749	0.000833931	1	VDNKFYKELCSAADEILVLPNLNDDQVLAFINSLRN			749	0.00399896	2	VDNKFSKEVVDATIEIHYLPNLNRDQKCAFIFSLFD			749	0.00194769	1	VDNKFNKEWDNASIEICGLPNLNGRQGPAFVFSLCD							0.00219208	0.001		0.00266786	0.001		0.00299948	0.001		0.001	0.001
750	0.00119208	1	VDNKFYKELFSAFDQIIFLPNLNRFQRGAFIGSLGN			750	0.000833931	1	VDNKFYKELCSAADEIFLLPNLNDDQVLAFINSLRN			750	0.00399896	2	VDNKFSKEVVDATIEIHYLPNLNRDQKCAFIFSLFD			750	0.00194769	1	VDNKFNKEWDNASLEISRLPNLNQIQQCAFVPSLYN							0.00219208	0.001		0.001	0.001		0.001	0.001		0.001	0.00279459
751	0.00119208	1	VDNKFYKEGNTATGQISSLPNLNLLQRVAFLFSLNN			751	0.000833931	1	VDNKFYKELCSAADEIFLLPNLNDDQVLAFINSLCN			751	0.00399896	2	VDNKFSKEVVDATIEIHYLPNLNLVQGYAFISSLSD			751	0.00194769	1	VDNKFNKEWDNASCQILNLPNLNRCQEYAFVFSLID							0.00338416	0.001		0.001	0.001		0.001	0.001		0.001	0.00458918
752	0.00119208	1	VDNKFYKEGNDASFEILDLPNLNGCQQYAFVPSLPN			752	0.000833931	1	VDNKFYKELCSAADEIFALPNLNDDQVLAFINSLRN			752	0.00399896	2	VDNKFSKEVVDATIEIHYLPNLNDAQRHAFIFSLFD			752	0.00194769	1	VDNKFNKEWDTATRQIVGLPNLNALQGLAFLRSLAN							0.001	0.0026065		0.0326894	0.0280557		0.001	0.001		0.001	0.001
753	0.00119208	1	VDNKFYKEGNYAVHEIFLLPNLNQSQMTAFVSSLTD			753	0.000833931	1	VDNKFYKELCSAADEIFVMPNLNDDQVLAFINSLRN			753	0.00399896	2	VDNKFSKEVVDATIEIHYLPNLNDAQRISFIFSLFD			753	0.00194769	1	VDNKFNKEWDTASVQIVALPNLNRSQGGAFVCSLCD							0.0105366	0.0154585		0.001	0.001		0.001	0.00293446		0.001	0.001
754	0.00119208	1	VDNKFYKEGTAANSQISILPNLNLGQVVAFILSLYD			754	0.000833931	1	VDNKFYKELCSAADEIFVLPNLNDDQVLAFINSLRN			754	0.00399896	2	VDNKFSKEVVDATIEIHYLPNLNDYQRVAFIFSLFD			754	0.00194769	1	VDNKFNKEWDTASVQIVGLPNLNRCQESAFVASLRD							0.001	0.0026065		0.001	0.001		0.001	0.001		0.00294768	0.001
755	0.00119208	1	VDNKFYKEGSDADVQIGGLPNLNRFQGCAFLVSLAN			755	0.000833931	1	VDNKFYKELCSAADEIFVLTNLNDDQVLAFINSLRN			755	0.00399896	2	VDNKFSKEVVDATIEIHYLPNLNDYQRVAFIFSLFD			755	0.00194769	1	VDNKFNKEWDTASVQIVGLPNLNLSQESAFLFSLVN							0.00219208	0.001		0.001	0.00308121		0.001	0.001		0.001	0.001
756	0.00119208	1	VDNKFYKEGINANFEIINLPNLNRNQVSAFIVSLHN			756	0.000833931	1	VDNKFYKELCSAADEIFVLQNLNDDQVLAFINSLRN			756	0.00399896	2	VDNKFSKEVVDATIEIHYLPNLNDYQRIAFIFSLFD			756	0.00194769	1	VDNKFNKEWDTASNEILGLPNLNQFQGAAFVHSLGN							0.00338416	0.001		0.00266786	0.001		0.001	0.00293446		0.001	0.00458918
757	0.00119208	1	VDNKFYKEGIYADAQIFGLPNLNEGQQGAFLISLCN			757	0.000833931	1	VDNKFYKELCSAADEIFVLQNLNDYQVLAFLHSLRD			757	0.00399896	2	VDNKFSKEVVDATIEIHYLPNLNESQVVAFVVSLFD			757	0.00194769	1	VDNKFNKEWDTASSQIANLPNLNHDQRDAFVVSLPD							0.00457624	0.00742601		0.00600359	0.001		0.001	0.00486892		0.001	0.001
758	0.00119208	1	VDNKFYKEGHDAYTEIASLPNLNDDQVYAFVSSLIN			758	0.000833931	1	VDNKFYKELCSAADEIFVLPNLNDYQVLAFLHSLRD			758	0.00399896	2	VDNKFSKEVVDATIEIHYLPNLNEPQVCAFVVSLCD			758	0.00194769	1	VDNKFNKEWDTATRQILDLPNLNRDQQYAFLASLPN							0.001	0.0026065		0.001	0.00308121		0.001	0.00486892		0.001	0.001
759	0.00119208	1	VDNKFYKEGHDAFPEIYDLPNLNEIQRSAFVFSLHD			759	0.000833931	1	VDNKFYKELCSAADEIFVLPNLNLSQERAFIISLRD			759	0.00399896	2	VDNKFSKEVVDATIEIHYLPNLNESQIIAFVNSLFD			759	0.00194769	1	VDNKFNKEWDTAVNEIIVLPNLNDNQQNAFVTSLND							0.00457624	0.001		0.00266786	0.001		0.001	0.001		0.001	0.001
760	0.00119208	1	VDNKFYKEGRSAIIQIVILPNLNVNQRGAFIYSLVN			760	0.000833931	1	VDNKFYKELCSAADEIFVLPNLNLSQVLAFLHSLRD			760	0.00399896	2	VDNKFSKEVVDATIEIHYLPNLNESQIIAFVVSLFD			760	0.00194769	1	VDNKFNKEWDTAVTQIISLPNLNVCQEPAFVNSLCD							0.00219208	0.001		0.00266786	0.001		0.0149964	0.122871		0.001	0.00279459
761	0.00119208	1	VDNKFYKEGLTAYFEILFLPNLNVSQLFAFVGSLGD			761	0.000833931	1	VDNKFYKELCSAADEIFVLPNLNDDQVIAFINSLRN			761	0.00399896	2	VDNKFSKEVVDATIEIHYLPNLNANQVIAFVCSLFD			761	0.00194769	1	VDNKFNKEWDDATTEIIRLPNLNGGQEIAFLHSLYN							0.00219208	0.001		0.001	0.001		0.00299948	0.001		0.001	0.001
762	0.00119208	1	VDNKFYKEGDYATVEIRPLPNLNQSQKRAFICSLDN			762	0.000833931	1	VDNKFYKELCSAADEIFVLPNLNDDQVLAFINRLRN			762	0.00399896	2	VDNKFSKEVVDATIEIHYLPNLNVDQRHAFIFSLFD			762	0.00194769	1	VDNKFNKEWDDATREIFGLPNLNPHQETAFVGSLGN							0.001	0.0026065		0.00266786	0.00308121		0.001	0.00293446		0.00294768	0.001
763	0.00119208	1	VDNKFYKEGDTATIQIYCLPNLNVSQLTAFVDSLFD			763	0.000833931	1	VDNKFYKELCSAADEIFVLPNLNDDQVLAFINSMRN			763	0.00399896	2	VDNKFSKEVVDATIEIHYLPNLNVDQRHAFIFSLFD			763	0.00194769	1	VDNKFNKEWDDAAFQILCLPNLNQSQEGAFLGSLGN							0.00219208	0.001		0.001	0.001		0.001	0.001		0.001	0.001
764	0.00119208	1	VDNKFYKEGADANRQIYILPNLNHSQECAFLHSLVN			764	0.000833931	1	VDNKFYKELCSAADEIFVLPNLNDDQVLAFINSLRN			764	0.00399896	2	VDNKFSKEVVDATIEIHYLPNLNVDQRHAFIFSLFD			764	0.00194769	1	VDNKFNKEWDDAVTQISRLPNLNPGQMHAFVGSLDD							0.00338416	0.00421301		0.001	0.001		0.0429891	0.0145412		0.001	0.001
765	0.00119208	1	VDNKFYKEGGDASDEIFPLPNLNHCQGLAFVASLID			765	0.000833931	1	VDNKFYKELCSAADEIFVLPNLNDDQVLAFINSLCN			765	0.00399896	2	VDNKFSKEVVDATIEIHYLPNLNVDQRHAFIFSLFD			765	0.00194769	1	VDNKFNKEWDDAVGEITRLPNLNRGQENAFIYSLAD							0.00338416	0.001		0.00266786	0.001		0.001	0.001		0.001	0.001
766	0.00119208	1	VDNKFYKEGVYAITEISALPNLNRLQGSAFIISLYD			766	0.000833931	1	VDNKFYKELCSAADEIFVLPNLNDDQVLAFLHSLNN			766	0.00399896	2	VDNKFSKEVVDATIEIHYLPNLNRDQKCAFIFSLFD			766	0.00194769	1	VDNKFNKEWDDAVYQICRLPNLNESQEGAFIHSLVD							0.001	0.0026065		0.001	0.00516242		0.001	0.001		0.001	0.00458918
767	0.00119208	1	VDNKFYKEGVNAFAQICILPNLNAHQEIAFLDSLCN			767	0.000833931	1	VDNKFYKELCSAADEIFVLPNLNDDQVLAFVNSLFD			767	0.00399896	2	VDNKFSKEVVDATIEIHYLPNLDRDQKCAFIFSLFD			767	0.00194769	1	VDNKFNKEWDDASGEILSLPNLNRVQGNAFILSLHD							0.00219208	0.001		0.00600359	0.00308121		0.001	0.001		0.001	0.001
768	0.00119208	1	VDNKFYKEGVNAFAQICILPNLNAHQEIAFLDSLCD			768	0.000833931	1	VDNKFYKELCSAADEIFVLPNLNDDHVLAFLHSLRD			768	0.00399896	2	VDNKFSKEVVDATIEIHYLPNLNRDQKCAFIFSLFD			768	0.00194769	1	VDNKFNKEWDDASCQIRRLPNLNVYQEYAFVLSLDD							0.001	0.0026065		0.00266786	0.001		0.001	0.001		0.001	0.001
769	0.00119208	1	VDNKFYKEGVD			769	0.000833931	1	VDNKFYKELCSAADEIFVLPNLNDYQVLAFINSLRD			769	0.00399896	2	VDNKFSKEVVDATIEIHYLPNLNRDQKCAFIFSLFD			769	0.00194769	1	VDNKFNKEWDDASFQILRLPNLNVDQELAFLSSLGN							0.00219208	0.001		0.00266786	0.001		0.001	0.001		0.001	0.001
770	0.00119208	1	VDNKFYKEGSTAYDQIDALPNLNGTQGSAFVGSLCD			770	0.000833931	1	VDNKFYKELCSAADEIFVLPNLNDYQVLAFLHSLPNLNLSQERAFIISLNN			770	0.00399896	2	VDNKFSKEVVDATIEIHFLPNLNVDQRHAFIFSLFD			770	0.00194769	1	VDNKFNKEWDDATAEISHLAELKPVSGKCLPLQPE*							0.00219208	0.001		0.001	0.001		0.001	0.001		0.001	0.001
771	0.00119208	1	VDNKFYKEGCAAYTEITVLPNLNPGQRFAFVLSLDD			771	0.000833931	1	VDNKFYKELCSAADEIFVLPNLNDYHVLAFLHSLRD			771	0.00399896	2	VDNKFSKEVVDATIEIHILPNLNDYQRVAFIFSLFD			771	0.00194769	1	VDNKFNKEWDDATCEICNLPNLNLGQGNAFVVSLLD							0.00219208	0.001		0.001	0.00308121		0.001	0.001		0.001	0.001
772	0.00119208	1	VDNKFYKEGCTADGQIFDLPNLNAVQEIAFLSSLRD			772	0.000833931	1	VDNKFYKELCSAADEIFVLPNLNYDQVLAFINSLRN			772	0.00399896	2	VDNKFSKEVVDATIEIHFLPNLKDAQRIAFIFSLFD			772	0.00194769	1	VDNKFNKEWDDATFQILGLPNLNRSQGGAFVYSLID							0.00219208	0.001		0.00433572	0.00724363		0.001	0.00293446		0.001	0.001
773	0.00119208	1	VDNKFYKEGFNASIEIINLPNLNHGQGDAFVYSLCN			773	0.000833931	1	VDNKFYKELCSAADEIFVLPNLDDDQVLAFINSLRN			773	0.00399896	2	VDNKFSKEVVDATIEIHFLPNLNPSQRLAFIFSLFD			773	0.00194769	1	VDNKFNKEWDDAINEICSLPNLNDVQGGAFICSLGD							0.0284178	0.00581951		0.001	0.00308121		0.001	0.0145412		0.001	0.001
774	0.00119208	1	VDNKFYKEVNYAFIEINRLPNLNASQEHAFINSLVN			774	0.000833931	1	VDNKFYKELCSAADEIFVLPNLNDDQVLAFINSLRN			774	0.00399896	2	VDNKFSKEVVDATIEIHFLPNLNDYQRVAFIFSLFD			774	0.00194769	1	VDNKFNKEWDDAIHEISRLPNLNDAQMPAFILSLFD							0.00219208	0.0026065		0.001	0.001		0.001	0.001		0.001	0.001
775	0.00119208	1	VDNKFYKEVSNAISQIVNLPNLNERQLIAFLPSLCD			775	0.000833931	1	VDNKFYKELCSAADEIFFLPNLNDDQVLAFINSLRN			775	0.00399896	2	VDNKFSKEVVDATIEILYLPNLNRDQKCAFIFSLFD			775	0.00194769	1	VDNKFNKEWDDAIGEICALPNLNACQGRAFLCSLGD							0.00219208	0.001		0.001	0.001		0.001	0.00486892		0.00294768	0.001
776	0.00119208	1	VDNKFYKEVHNAFDQISILPNLNVYQIVAFIRSLDN			776	0.000833931	1	VDNKFYKELCSASDEIFVLPNLNDDQVLAFINSLRN			776	0.00399896	2	VDNKFSKEVVDATIEIYYLPNLNRDQKCAFIFSLFD			776	0.00194769	1	VDNKFNKEWDDAARQIVDLPNLNLLQGDAFITSLAD							0.00219208	0.00421301		0.00266786	0.00724363		0.00899792	0.001		0.001	0.001
777	0.00119208	1	VDNKFYKEVRNADSQIAGLPNLNLVQGAAFISSLYN			777	0.000833931	1	VDNKFYKELFNAAFEIVSLPNLNLSQERAFIISLRN			777	0.00399896	2	VDNKFSKEVVDAIIEIHYLPNLNRDQKCAFIFSLFD			777	0.00194769	1	VDNKFNKEWDDAVSQICCLPNLNGLQLGAFVDSLDD							0.0236495	0.0283106		0.00266786	0.001		0.001	0.00293446		0.001	0.00279459
778	0.00119208	1	VDNKFYKEVRYANGEIICLPNLNGRQKFAFVSSLFD			778	0.000833931	1	VDNKFYKELFNAAFEIVSLPNLNLSQERAFIISLRD			778	0.00399896	2	VDNKFSKEVVDAIHEIHFLPNLNDAQRIAFIFSLFD			778	0.00194769	1	VDNKFNKEWDDAVRQISILPNLNEIQRRAFIYSLLN							0.00219208	0.001		0.00433572	0.00308121		0.00299948	0.001		0.001	0.00458918
779	0.00119208	1	VDNKFYKEVLNAIGEITFLPNLNVDQQNAFIRSLDN			779	0.000833931	1	VDNKFYKELFNAAFQIVSLPNLNLSQERAFIISLNN			779	0.00399896	2	VDNKFSKEVVDAIHEIHFLPNLNGVQKSAFVFSLVN			779	0.00194769	1	VDNKFNKEWDDAVRQISILPNLNEIQRRAFLLSLRN							0.001	0.0026065		0.001	0.001		0.001	0.001		0.001	0.001
780	0.00119208	1	VDNKFYKEVLYAIGQIPPLPNLNLSQKVAFIISLGN			780	0.000833931	1	VDNKFYKEGPSADTQINLLPNLNGCQGFAFVTSLRN			780	0.00399896	2	VDNKFSKEVVGATIEIHYLPNLNRDQKCAFIFSLFD			780	0.00194769	1	VDNKFNKEWDDAVNQIFALPNLNRSQGCAFVSSLGD							0.00219208	0.001		0.001	0.001		0.001	0.00293446		0.001	0.001
781	0.00119208	1	VDNKFYKEVLYAIGQILPLPNLNLSQKVAFIISLTN			781	0.000833931	1	VDNKFYKEVVDASVQIAALPNLNQGQGIAFVNSLVD			781	0.00399896	2	VDNKFSKEVYDAIHEIHFLPNLNDAQRIAFIFSLFD			781	0.00194769	1	VDNKFNKEWDDAVHQILCLPNLNVIQGSAFVTSLYD							0.00219208	0.001		0.001	0.001		0.001	0.001		0.001	0.00458918
782	0.00119208	1	VDNKFYKEVLYASGEIVILPNLNHLQRSAFICSLRN			782	0.000833931	1	VDNKFYKEWTSAFRQICGLPNLNPDQERAFIISLGD			782	0.00399896	2	VDNKFSKEVYDAIPQIHYLPNLNGLQRYAFIFSLFD			782	0.00194769	1	VDNKFNKEWDDAVRQILVLPNLNRGQMGAFVHSLGN							0.00338416	0.001		0.00266786	0.00724363		0.001	0.001		0.001	0.00279459
783	0.00119208	1	VDNKFYKEVLYASGEIVILPNLNQYQEAAFISSLID			783	0.000833931	1	VDNKFYKEWSYASDEICGLPNLNECQGVAFLGSLND			783	0.00399896	2	VDNKFSKEVYAASHEISFLPNLNLFQKCAFLPSLHN			783	0.00194769	1	VDNKFNKEWDDAVAQILCLPNLNRFQGDAFVSSLVD							0.00219208	0.001		0.00266786	0.001		0.001	0.00293446		0.00294768	0.001
784	0.00119208	1	VDNKFYKEVLYATDQISGLPNLNAFQEFAFIFSLTN			784	0.000833931	1	VDNKFYKEWIYAVSEILALPNLNGSQERAFVSSLCD			784	0.00399896	2	VDNKFSKEVCDAINEIHFLPNLNDAQRIAFIFSLFD			784	0.00194769	1	VDNKFNKEWDDAVFEILGLPNLNGIQEFAFLRSLDD							0.00576832	0.001		0.00433572	0.001		0.001	0.00873784		0.00294768	0.00279459
785	0.00119208	1	VDNKFYKEVDNAIIQIRRLPNLNQSQRDAFVGSLPD			785	0.000833931	1	VDNKFYKEWHAFVVSLDD			785	0.00399896	2	VDNKFSKEVCDAIHEIHYLPNLNRDQKCAFIFSLFD			785	0.00194769	1	VDNKFNKEWDDAVFEILGLPNLNGCQEYAFVCSLGN							0.00219208	0.001		0.00266786	0.001		0.00299948	0.001		0.001	0.00458918
786	0.00119208	1	VDNKFYKEVVDAVSEIAYLPNLNADQLCAFIFSLTN			786	0.000833931	1	VDNKFYKEWDAAAAEICCLPNLNAFQGTAFLRSLGN			786	0.00399896	2	VDNKFSKEVCDAIHEIHYLPNLNRDQKCAFIFSLFD			786	0.00194769	1	VDNKFNKEWDDASRQICALPNLNACQGYAFLSSLFN							0.00219208	0.001		0.00266786	0.001		0.001	0.00293446		0.001	0.00279459
787	0.00119208	1	VDNKFYKEVYNASCEIFLLPNLNRDQESAFVRSLGN			787	0.000833931	1	VDNKFYKEWAYASLQIAILPNLNEDQGAAFVSSLDD			787	0.00399896	2	VDNKFSKEVCDAIHEIHYLPNLNDYQRVAFIFSLFD			787	0.00194769	1	VDNKFNKEWDDASNQIVRLPNLNASQGFAFISSLTN							0.00219208	0.001		0.001	0.001		0.001	0.001		0.00294768	0.001
788	0.00119208	1	VDNKFYKEVYYADRQIVCLPNLNVIQQVAFLCSLGN			788	0.000833931	1	VDNKFYKEWADATNQIVGLPNLNGPQQDAFLISLAD			788	0.00399896	2	VDNKFSKEVCDAIHEIHFLPNLNDAQRIAFIFSLFD			788	0.00194769	1	VDNKFNKEWDDASGEILRLPNLNESQRHAFIGSLGD							0.00219208	0.001		0.00433572	0.00516242		0.001	0.001		0.001	0.001
789	0.00119208	1	VDNKFYKEVYTAFIQIPSLPNLNPCQKDAFLCSLPN			789	0.000833931	1	VDNKFYKEWGTASNEIICLPNLNLGQRPAFVVSLHD			789	0.00399896	2	VDNKFSKEVCDAIHEIHILPNLNDYQRVAFIFSLFD			789	0.00194769	1	VDNKFNKEWDAATLEIILLPNLNHLQENAFLYSLGD							0.00219208	0.001		0.001	0.001		0.001	0.00293446		0.00489537	0.001
790	0.00119208	1	VDNKFYKEVYDAVYEIDCLPNLNRAQQRAFINSLID			790	0.000833931	1	VDNKFYKEWSYASAQIRCLPNLNAVQGVAFIDSLVN			790	0.00399896	2	VDNKFSKEVCDAIHEIHILPNLNDYQIVAFIFSLFD			790	0.00194769	1	VDNKFNKEWDAATHEICRLPNLNGDQETAFVHSLCD							0.00457624	0.00742601		0.001	0.001		0.001	0.001		0.001	0.00279459
791	0.00119208	1	VDNKFYKEVSYASYEICGLPNLNREQGGAFIVSLWD			791	0.000833931	1	VDNKFYKEWCDASYQIFNLPNLNGNQMHAFVSSLGN			791	0.00399896	2	VDNKFSKEVCDAIHEIHFPPNLNDAQRIAFIFSLFD			791	0.00194769	1	VDNKFNKEWDAAIHEIINLPNLNRIQGCAFVCSLND							0.001	0.00421301		0.001	0.001		0.001	0.00293446		0.001	0.001
792	0.00119208	1	VDNKFYKEVFNATPQIGGLPNLNAGQGSAFIISLCD			792	0.000833931	1	VDNKFYKEWCAASSEIVCQTRTR*TPSSLA*MT			792	0.00399896	2	VDNKFSKEVCDAIHEIHFLPNLNDAQRIAFIFSLFD			792	0.00194769	1	VDNKFNKEWDAAIHEIINLPNLNRIQGCAFVYRPD*							0.001	0.0026065		0.00266786	0.001		0.001	0.001		0.00489537	0.001
793	0.00119208	1	VDNKFYKEVFYADSEIIILPNLNVSQRRAFLHSLGD			793	0.000833931	1	VDNKFYKEWCSATVEIAVLPNLNVCQEDAFLCSLSN			793	0.00399896	2	VDNKFSKEVCDAIHEIHFLPKLNDAQRIAFIFSLFD			793	0.00194769	1	VDNKFNKEWDAAVFQICNLPNLNANQEGAFLDSLHD							0.001	0.0026065		0.001	0.001		0.001	0.001		0.00294768	0.001
794	0.00119208	1	VDNKFYKEVFYAVCEIAVLPNLNEYQKGAFVVSLID			794	0.000833931	1	VDNKFYKELNDAAYQIATLPNLNDYQVLAFLHSLRD			794	0.00399896	2	VDNKFSKEVCDAIHEIHFLPNLKDAQRIAFIFSLFD			794	0.00194769	1	VDNKFNKEWDAAVHQITALPNLNGVQQPAFLPSLND							0.00219208	0.001		0.001	0.00308121		0.001	0.001		0.001	0.00279459
795	0.00119208	1	VDNKFYKEWNDAFIEIIRLPNLNQFQEFAFIPSLGN			795	0.000833931	1	VDNKFYKELNDAAYQIATLPNLNEVQERAFVNSLRN			795	0.00399896	2	VDNKFSKEVCDAIHEIHFLPNLNSDQKCAFIFSLFD			795	0.00194769	1	VDNKFNKEWDAAVAEIARLPNLNAGQGPAFVSSLCD							0.0653723	0.0026065		0.001	0.001		0.00499896	0.00873784		0.00294768	0.001
796	0.00119208	1	VDNKFYKEWTNASAQIICLPNLNLTQMSAFVDSLCN			796	0.000833931	1	VDNKFYKELNDAAYQIATLPNLNEVQERAFFNSLFD			796	0.00399896	2	VDNKFSKEVCDAIHEIHFLPNLNPSQRLAFIFSLFD			796	0.00194769	1	VDNKFNKEWDAASREICCLPNLNQYQGCAFIASLVD							0.00338416	0.001		0.001	0.00308121		0.001	0.00293446		0.00294768	0.001
797	0.00119208	1	VDNKFYKEWTAAALEIIDLPNLNAIQGCAFLDSLGN			797	0.000833931	1	VDNKFYKELDTAVDEIFFLPNLNDYQVLAFLHSLRD			797	0.00399896	2	VDNKFSKEVCDAIHEIHFLPNLNRDQKCAFIFSLHN			797	0.00194769	1	VDNKFNKEWDAASCQICLLPNLNPSQIVAFVDSLPD							0.00338416	0.00421301		0.001	0.001		0.001	0.001		0.001	0.00279459
798	0.00119208	1	VDNKFYKEWTYATHEILNLPNLNENQGCAFLASLCD			798	0.000833931	1	VDNKFYKELCSAADEIFVLPNLNDDQVLAFINSLRN			798	0.00399896	2	VDNKFSKEVCDAIHEIHFLPNLNDAQRVAFIFSLFD			798	0.00194769	1	VDNKFNKEWDAATVEICTLPNLNVGQRAAFVDSLSD							0.0129208	0.00903252		0.00266786	0.001		0.001	0.001		0.001	0.001
799	0.00119208	1	VDNKFYKEWSAATYEISRLPNLNHRQGFAFVYSLCD			799	0.000833931	1	VDNKFSKEVVDATIEIHYLPNLNRDQKCAFIFSLFD			799	0.00399896	2	VDNKFSKEVCDAIHEIHFLPNLNDAQRIAFIFRLFD			799	0.00194769	1	VDNKFNKEWDAAITEICGLPNLNDHQGSAFVNSLDN							0.00219208	0.001		0.001	0.001		0.001	0.00293446		0.001	0.001
800	0.00119208	1	VDNKFYKEWSSAFTQIFCLPNLNPHQLGAFVSSLGD			800	0.000833931	1	VDNKFSKEVVDATIEIHYLPNLNDAQRIAFIFSLFD			800	0.00399896	2	VDNKFSKEVCDAIHEIHFLPNLNDYQRHAFIFSLFD			800	0.00194769	1	VDNKFNKEWDAAAIQICNLPNLNGLQMGAFVYSLDN							0.00219208	0.001		0.001	0.001		0.001	0.00293446		0.001	0.001
801	0.00119208	1	VDNKFYKEWINATTEIAGLPNLNEVQGNAFVISLNN			801	0.000833931	1	VDNKFSKEVCDAYAQIGNLPNLNVYQIVAFIRSLDN			801	0.00399896	2	VDNKFSKEVCDAIHEIHFLPNLNDYQRVAFIFSLFD			801	0.00194769	1	VDNKFNKEWDAAAIQICNLPNLNGGQGAAFIDSLVD							0.001	0.0026065		0.00266786	0.001		0.001	0.00293446		0.00294768	0.001
802	0.00119208	1	VDNKFYKEWITADVEICILPNLNEIQRSAFVFSLHD			802	0.000833931	1	VDNKFSKEWNDAVSQICFLPNLNLDQGIAFVTSLSD			802	0.00399896	2	VDNKFSKEVCDAIHEIHFLPNLNESQVVAFVVSLFD			802	0.00194769	1	VDNKFNKEWDAAAAEIFRLPNLNRRQGAAFLNSLGD							0.001	0.0026065		0.00266786	0.001		0.00699844	0.001		0.001	0.001
803	0.00119208	1	VDNKFYKEWIYASIQIVCLPNLNAIQECAFVYSLNN			803	0.000833931	1	VDNKFSKEWNDASVEIANLPKLKRGSADCLPFQPV*			803	0.00399896	2	VDNKFSKEVCDAIHEIHFLPNLNVFQRLAFIFSLFD			803	0.00194769	1	VDNKFNKEWDAAVYEICTLPNLNGLQESAFIDSLND							0.00219208	0.00581951		0.00433572	0.00308121		0.001	0.00293446		0.001	0.00458918
804	0.00119208	1	VDNKFYKEWISAACQIPILPNLNARQKPAFLVSLCD			804	0.000833931	1	VDNKFSKEWSDAVREIVGLPNLNGCQVSAFIVSLSD			804	0.00399896	2	VDNKFSKEVCDAIHEIHFLPNLNYAQRIAFIFSLFD			804	0.00194769	1	VDNKFNKEWDAAVSQILCLPNLNEAQVGAFVSSLNN							0.001	0.0026065		0.001	0.001		0.00299948	0.001		0.00294768	0.001
805	0.00119208	1	VDNKFYKEWIAAIDQIHCLPNLNGTQVRAFIPSLVD			805	0.000833931	1	VDNKFSKEWDTASHEIINLPNLNRVQRGAFIVSLNN			805	0.00399896	2	VDNKFSKEVCDAIHEIHFLPNLNYYQRVAFVCSLFD			805	0.00194769	1	VDNKFNKEWDAAVNQILDLPNLNETQGRCLRKQPE*							0.00219208	0.0026065		0.001	0.00308121		0.001	0.001		0.001	0.00279459
806	0.00119208	1	VDNKFYKEWHDATVQICRLPNLNAVQEVAFIVSLAD			806	0.000833931	1	VDNKFSKEWAAASVEIVVLPNLNQCQRSAFVSSLGD			806	0.00399896	2	VDNKFSKEVCDAIHEIHFLLNLNDAQRIAFIFSLFD			806	0.00194769	1	VDNKFNKEWDAAVNQILDLPNLNVGQGYAFVSSLYD							0.00219208	0.001		0.00266786	0.00932484		0.001	0.001		0.001	0.001
807	0.00119208	1	VDNKFYKEWHYAIPQICTLPNLNGIQRPAFVVSLGD			807	0.000833931	1	VDNKFSKEWGYAAFEILNLPNLNLFQESAFISSLPN			807	0.00399896	2	VDNKFSKEVCDAIHEIHFLPNLNDAQRIAFIFSLFD			807	0.00194769	1	VDNKFNKEWDAAVDQIVRLPNLNQGQGFAFIDSLRN							0.001	0.0026065		0.00266786	0.001		0.0189953	0.076444		0.00489537	0.001
808	0.00119208	1	VDNKFYKEWRNASCQICDLPNLNGCQMDAFLLSLRD			808	0.000833931	1	VDNKFSKEWGYAAFEILNLPNLNVDQGNAFIGSLDD			808	0.00399896	2	VDNKFSKEVCDAYAQIGNLPNLNVYQIVAFIFSLFD			808	0.00194769	1	VDNKFNKEWDAASSEICNLPNLNHLQMCAFVPSLYN							0.00219208	0.001		0.001	0.001		0.001	0.001		0.001	0.00279459
809	0.00119208	1	VDNKFYKEWRTADREILGLPNLNPPQGPAFVSSLID			809	0.000833931	1	VDNKFSKEWSTASCQIGCLPNLNGTQGGAFIDSLAD			809	0.00399896	2	VDNKFSKEVCDAIYEIHILPNLNVFQRLAFIFSLFD			809	0.00194769	1	VDNKFNKEWDAASHQILHLPNLNVYQETAFIFSLCN							0.00219208	0.001		0.001	0.001		0.001	0.001		0.001	0.001
810	0.00119208	1	VDNKFYKEWRTADREILGLPNLNRPQESAFVNSLID			810	0.000833931	1	VDNKFSKEWCAAVNEICCLPNLNGGQERAFIGSLSD			810	0.00399896	2	VDNKFSKEWDDAVIEIVHLPNLNAVQRSAFICSLRD			810	0.00194769	1	VDNKFNKEWDAASGQILDLPNLNGTQEVAFVVSLSD							0.001	0.0026065		0.001	0.011406		0.00299948	0.026148		0.001	0.00279459
811	0.00119208	1	VDNKFYKEWLAATAEISGLPNLNAGQGHAFIISLSD			811	0.000833931	1	VDNKFSKELISAIIEISFLPNLNESQGRAFIGSLDD			811	0.00399896	2	VDNKFSKELYTAIYEIFVLPNLNESQIIAFVNSLFD			811	0.00194769	1	VDNKFNKEWDAASGQILDLPNLNSCQGSAFIDSLSD							0.001	0.0026065		0.001	0.001		0.001	0.001		0.001	0.00279459
812	0.00119208	1	VDNKFYKEWLNAYHEINRLPNLNGGQVYAFIRSLDN			812	0.000833931	1	VDNKFSKELDNAVFEITVLPNLNGFQRAAFVLSLYN			812	0.00399896	2	VDNKFSKELCDAIVEIHFLPNLNANQVIAFVCSLFD			812	0.00194769	1	VDNKFNKEWDAASSEICFLPNLNGDQEHAFVYSLGD							0.001	0.0026065		0.001	0.001		0.001	0.001		0.001	0.00279459
813	0.00119208	1	VDNKFYKEWLTATYQIARLPNLNDIQEVAFVVSLCD			813	0.000833931	1	VDNKFSKELVYAFDEICCLPNLNGVQMSAFLSSLGN			813	0.00399896	2	VDNKFSKELCDAIVEIHFLPNLNVDQRHAFIFSLFD			813	0.00194769	1	VDNKFNKEWDAASCQILGLPNLNRDQGFAFVASLAD							0.00338416	0.001		0.00266786	0.001		0.001	0.001		0.001	0.001
814	0.00119208	1	VDNKFYKEWLSASIEILILPNLNPVQGPAFISSLRD			814	0.000833931	1	VDNKFSKEGVTAAIEIFYLPNLNARQKPAFLVSLCD			814	0.00399896	2	VDNKFSKELCDAIVEIHFLPNLNVDQRLAFIFSLFD			814	0.00194769	1	VDNKFNKEWDAASCQILGLPNLNRGQQGAFVHSLIN							0.001	0.00421301		0.001	0.00308121		0.001	0.001		0.001	0.001
815	0.00119208	1	VDNKFYKEWANAAHQILGLPNLNVGQGHAFIFSLPD			815	0.000833931	1	VDNKFSKEVLNAYSEIFLLPNLNVYQIVAFIRSLDN			815	0.00399896	2	VDNKFSKELCDAIVEIHFLPNLNVDQRVAFIFSLFD			815	0.00194769	1	VDNKFNKEWDYATRQIVNLPNLNVSQQCAFLPSLTD							0.00457624	0.0026065		0.00266786	0.001		0.001	0.00293446		0.00294768	0.001
816	0.00119208	1	VDNKFYKEWANASDEIISLPNLNVDQMDAFVCSLSD			816	0.000833931	1	VDNKFSKEWTYAITQICGLPNLNHHQGNAFLSSLCD			816	0.00399896	2	VDNKFSKELCDAIVEIHFLPNLNVDQRIAFIFSLFD			816	0.00194769	1	VDNKFNKEWDYAVHQICILPNLNVDQGNAFLRSLGD							0.001	0.0026065		0.001	0.00308121		0.001	0.001		0.001	0.001
817	0.00119208	1	VDNKFYKEWANASFQIICLPNLNGTQGTAFIDSLSD			817	0.000833931	1	VDNKFSKEWSNASDQICVLPNLNVRQRDAFIGSLGN			817	0.00399896	2	VDNKFSKELCDAIVEIHILPNLNDYQRVAFIFSLFD			817	0.00194769	1	VDNKFNKEWDYASAQILYLPNLNPHQIDAFVRSLGN							0.00219208	0.001		0.001	0.001		0.001	0.001		0.001	0.001
818	0.00119208	1	VDNKFYKEWGTATSQIYRLPNLNVYQIVAFIRSLDN			818	0.000833931	1	VDNKFSKEWIYAFCEINCLPNLNHGQVDAFLSSLYN			818	0.00399896	2	VDNKFSKELCDGIVEIHFLPNLNVDQRHAFIFSLFD			818	0.00194769	1	VDNKFNKEWDYASAQILYLPNLNAGQEGAFLISLSD							0.016497	0.017065		0.001	0.00932484		0.0169958	0.051296		0.001	0.001
819	0.00119208	1	VDNKFYKEWGSASVQILSLPNLNRRQGCAFIFSLNN			819	0.000833931	1	VDNKFSKEWDDAVRQICTLPNLNRSQRPAFLGSLVD			819	0.00399896	2	VDNKFSKELCYAVSEIHYLPNLNRYQKCAFIFSLFD			819	0.00194769	1	VDNKFNKEWDYASLEILCLPNLNGYQGGAFIHSLRD							0.001	0.0026065		0.001	0.001		0.00499896	0.001		0.001	0.001
820	0.00119208	1	VDNKFYKEWVDATSQIGALPNLNRRQRHAFVFSLSN			820	0.000833931	1	VDNKFSKEWDDAVAEIGCLPNLNLCQGNAFVYSLVD			820	0.00399896	2	VDNKFSKEVVDATIEIHYLPNLNRDQKCAFIFSLFD			820	0.00194769	1	VDNKFNKEWDYATSQILVLPNLNHVQLVAFVHSLPD							0.00219208	0.001		0.00600359	0.00516242		0.001	0.001		0.001	0.001
821	0.00119208	1	VDNKFYKEWYNAFLEIDSLPNLNGIQGFAFVCSLTN			821	0.000833931	1	VDNKFSKEWGYAAFEILNLPNLNRGQEGAFISSLTD			821	0.00399896	2	VDNKFSK*VVDATIEIHYLPNLNRDQKCAFIFSLFD			821	0.00194769	1	VDNKFNKEWDYATGEILSLPNLNVPQENAFVRSLVD							0.00338416	0.001		0.001	0.001		0.001	0.00293446		0.00294768	0.001
822	0.00119208	1	VDNKFYKEWSTASCEILALPNLNGDQGCAFIGSLSD			822	0.000833931	1	VDNKFSKEWVNASRQICSLPNLNEGQVRAFVPSLHN			822	0.00399896	2	VDNKFSEEVVDATIEIHYLPNLNRDQKCAFIFSLFD			822	0.00194769	1	VDNKFNKEWDYAADQIGRLPNLNAAQVPAFVYSLCD							0.001	0.0026065		0.001	0.001		0.00299948	0.001		0.001	0.001
823	0.00119208	1	VDNKFYKEWSTAVAEIILLPNLNVDQGCAFLPSLTD			823	0.000833931	1	VDNKFSKEWYTASVEICGLPNLNGYQGAAFIHSLSD			823	0.00399896	2	VDNKFSKEVLNAYSEIFLLPNLNVDQILAFVLSLDN			823	0.00194769	1	VDNKFNKEWDYAASQILALPNLNGCQLYAFIPSLGN							0.001	0.0026065		0.001	0.001		0.001	0.00293446		0.001	0.001
824	0.00119208	1	VDNKFYKEWSYAVSEISSLPNLNDDQILAFLASLIN			824	0.000833931	1	VDNKFSKEWSDAIHEITSLPNLNRCQGSAFLISLAD			824	0.00399896	2	VDNKFSKEVYAAVYEIHGLPNLNRDQKCAFIFSLFD			824	0.00194769	1	VDNKFNKEWDYAVSQISTLPNLNPCQGDAFIPSLVN							0.001	0.0026065		0.001	0.00308121		0.001	0.001		0.001	0.001
825	0.00119208	1	VDNKFYKEWSNAICEILCLPNFKRRSEGRLHSQPG*			825	0.000833931	1	VDNKFSKEWCSAVCQILSLPNLNGIQGSAFVSSLCD			825	0.00399896	2	VDNKFSKEVCDAFGQICSLPNLNVNQRYAFVRSLRN			825	0.00194769	1	VDNKFNKEWDYAVSQISTLPNLNACQEFAFLDSLDD							0.00219208	0.001		0.001	0.001		0.001	0.001		0.00294768	0.001
826	0.00119208	1	VDNKFYKEWCNATLEIYYLPNLNASQEAAFVGSLSD			826	0.000833931	1	VDNKFSKELYSAVCEIHFLPNLNPSQRLAFIFSLFD			826	0.00399896	2	VDNKFSKEWDYAVRQIDGLPNLNLSQLDAFLTSLDD			826	0.00194769	1	VDNKFNKEWDYAVRQIIFLPNLNRSQVDAFVNSLDN							0.00219208	0.001		0.001	0.001		0.001	0.001		0.001	0.001
827	0.00119208	1	VDNKFYKEWCSAISEIGHLPNLNAGQKDAFVPSLTD			827	0.00166786	2	VDNKSTKEVPNASDQIFLLPNLNDYQVLAFLHSLRD			827	0.00399896	2	VDNKFSKELGNAICEIVGLPNLNPDQLGAFVVSLDD			827	0.00194769	1	VDNKFNKEWDYAVREIISLPNLNALQVPAFLVSLPN							0.00219208	0.001		0.001	0.001		0.001	0.001		0.001	0.001
828	0.00119208	1	VDNKFYKEWCNAVTQILRLPNLNLRQVRAFVYSLDD			828	0.00166786	2	VDNKFNKEVPNASDQIFLLPNLNDYQVLAFINSLRN			828	0.00399896	2	VDNKFSKELVNAVVQIHHLPNLNVIQVCAFIFSLFD			828	0.00194769	1	VDNKFNKEWDYAVAQILCLPNLNAGQGLAFVGSLID							0.00219208	0.001		0.001	0.001		0.001	0.001		0.001	0.00279459
829	0.00119208	1	VDNKFYKEWCAATTEIAFLPNLNAVQGDAFVFSLGD			829	0.00166786	2	VDNKFNKEVPNASDQIFLLPNLNDYQVLAFLHSLRD			829	0.00399896	2	VDNKFSKELYDAFYEIYYLPNLNLNQGCAFIVSLPD			829	0.00194769	1	VDNKFNKEWDYAVTEICALPNLNAGQEYAFVDSLAD							0.00219208	0.00421301		0.00266786	0.00516242		0.00299948	0.001		0.001	0.00458918
830	0.00119208	1	VDNKFYKEWFNATVEILVLPNLNRSQGRAFIGSLYD			830	0.00166786	2	VDNKFNKEWPYADYEICTLPNLNDYQVLAFLHSLRD			830	0.00399896	2	VDNKFSKELYSAVCEIHFLPNLNPSQRHAFIFSLFD			830	0.00194769	1	VDNKFNKEWDYASTEILGLPNLNDSQVGAFVTSLYD							0.00219208	0.001		0.001	0.00308121		0.001	0.001		0.001	0.00279459
831	0.00119208	1	VDNKFYKEWFNAYNEIIRLPNLNHCQRSAFLSSLND			831	0.00166786	2	VDNKFNKEWFAATYQICRLPNLNHHQVSAFIVSLCD			831	0.00399896	2	VDNKFSKELYSAVCEIHFLPNLNPSQRLAFIFSLFD			831	0.00194769	1	VDNKFNKEWDYASAQIFRLPNLNDDQVGAFVCSLGN							0.00457624	0.00742601		0.001	0.00308121		0.001	0.001		0.001	0.001
832	0.00119208	1	VDNKFYKEWFDAAREIDILPNLNPSQVGAFVCSLIN			832	0.00166786	2	VDNKFNKELHYAVHEIISLPNLNEDQVLAFLHSLRD			832	0.00399896	2	VDNKFSKELYSAVCEIHFLPNLNPSQRLAFIFSLFD			832	0.00194769	1	VDNKFNKEWDYASSEILSLPNLNEPQRCAFIGSLCD							0.00219208	0.0026065		0.001	0.001		0.00299948	0.001		0.001	0.00279459
833	0.00119208	1	VDNKFYKEWFAASLQIISLPNLNGVQRNAFVSSLAD			833	0.00166786	2	VDNKFNKELFNAAFEIVSMPNLNLSQERAFIISLNN			833	0.00399896	2	VDNKFSKELYSAVCEIHFLPNLNPSQRLAFIFSLFD			833	0.00194769	1	VDNKFNKEWDYASFQILALPNLNVFQLYAFLPSLGD							0.001	0.0026065		0.001	0.00308121		0.001	0.001		0.001	0.001
834	0.00119208	1	VDNKFYKEWFYASCQICALPNLNPYQVPAFVTSLGN			834	0.00166786	2	VDNKFNKELFNAAFEIVSLQNLNLSQERAFIISLNN			834	0.00399896	2	VDNKFSKELYSAVCEIHFLPNLNESQVVAFVVSLFD			834	0.00194769	1	VDNKFNKEWDSATAQIVHLPNLNGFQEYAFLDSLSD							0.00457624	0.00903252		0.00600359	0.0176497		0.001	0.00680338		0.001	0.001
835	0.00119208	1	VDNKFYKELSNAFHEINGLPNLNGLQVCAFIFSLAD			835	0.00166786	2	VDNKFNKELFNAAFEIVSLPNLNLSQESAFIISLNN			835	0.00399896	2	VDNKFSKELYSAVC*IHFLPNLNPSQRLAFIFSLFD			835	0.00194769	1	VDNKFNKEWDSATAQIVHLPNLNRVQEGAFVNSLRD							0.00815248	0.00421301		0.012675	0.00516242		0.001	0.001		0.00294768	0.001
836	0.00119208	1	VDNKFYKELSTAVYEIFALPNLNESQVVAFVVSLFD			836	0.00166786	2	VDNKFNKELFNAAFEIVSLPNLNLSQELAFIISLNN			836	0.00399896	2	VDNKFSKELSNADVEISNLPNLNQNQGRAFVGSLFN			836	0.00194769	1	VDNKFNKEWDSATAQIVHLPNLNGFQEYAFLDSLSD							0.00219208	0.001		0.00266786	0.001		0.001	0.001		0.001	0.001
837	0.00119208	1	VDNKFYKELIAAFDEICPLPNLNVGQVRAFVSSLRD			837	0.00166786	2	VDNKFNKELFNAAFEIVSLPNLNLSQVLAFINSLRN			837	0.00599844	3	VDNKFSKEVVDATIEIHYLPNLNRDQKCAFIFSLFD			837	0.00194769	1	VDNKFNKEWDSAVNEICNLPNLNQLQGVAFIDSLCN							0.001	0.0026065		0.001	0.001		0.00299948	0.0648372		0.00294768	0.00279459
838	0.00119208	1	VDNKFYKELITAISQIGYLPNLNGCQRSAFVVSLYN			838	0.00166786	2	VDNKFNKELFNAAFEIVSLPNLNDYQVLAFINSLRN			838	0.00599844	3	VDNKFNKEVCDAYAQIGNLPNLNDAQRIAFIFSLFD			838	0.00194769	1	VDNKFNKEWDSAVRQICCLPNLNRVQGGAFIGSLYN							0.00219208	0.001		0.001	0.001		0.001	0.001		0.00294768	0.001
839	0.00119208	1	VDNKFYKELITAISQIGYLPNLNGCQRSAFVVSLFN			839	0.00166786	2	VDNKFNKELFNAAFEIVSLPNLNLSQERAFIISLNN			839	0.00599844	3	VDNKFNKELFNAAFEIVSLPNLNLSQERAFIISLNN			839	0.00194769	1	VDNKFNKEWDSASFQILHLPNLNAVQGTAFINSLFD							0.001	0.0026065		0.001	0.001		0.00299948	0.001		0.001	0.001
840	0.00119208	1	VDNKFYKELIDADSEIGYLPNLNVYQMYAFVCSLLN			840	0.00166786	2	VDNKFNKEGDYAVFQICGLPNLNEGQGAAFVGSLHN			840	0.00599844	3	VDNKFTKEVVDATIEIHYLPNLNRDQKCAFIFSLFD			840	0.00194769	1	VDNKFNKEWDSATCEILALPNLNGPQEDAFVRSLAN							0.00815248	0.017065		0.001	0.001		0.001	0.001		0.001	0.00279459
841	0.00119208	1	VDNKFYKELHTASRQIRILPNLNHSQRVAFVGSLSD			841	0.00166786	2	VDNKFTKKVPNASDQIFLLPNLNDYQVLAFLHSLRD			841	0.00599844	3	VDNKFTKEVDSAIFEIFSLPNLNANQVIAFVCSLFD			841	0.00194769	1	VDNKFNKEWDSATLEILALPNLNRNQMPAFVRSLSD							0.00219208	0.001		0.001	0.00308121		0.00499896	0.001		0.001	0.001
842	0.00119208	1	VDNKFYKELHYAFCEINILPNLNREQGGAFIVSLWD			842	0.00166786	2	VDNKFTKEMPNASDQIFLLPNLNDYQVLAFLHSLRD			842	0.00599844	3	VDNKFTKEVDSAVCEIHFLPNLNPSQRLAFIFSLFD			842	0.00194769	1	VDNKFNKEWDSATYQILGLPNLNRFQMCAFIGSLCD							0.00219208	0.001		0.001	0.00308121		0.001	0.001		0.001	0.001
843	0.00119208	1	VDNKFYKELHYAFCEINILPNLNERQESAFLTSLSD			843	0.00166786	2	VDNKFTKEVPNASDQIFLLPNLNDYQVLAFLHSLRD			843	0.00599844	3	VDNKFTKEVDSAVFEIHILPNLNDAQRIAFIFSLFD			843	0.00194769	1	VDNKFNKEWDSAIFEISRLPNLNRDQGGAFVCSLVD							0.001	0.0026065		0.001	0.00308121		0.001	0.001		0.00294768	0.001
844	0.00119208	1	VDNKFYKELHSAVGQIGVLPNLNDAQKGAFVCSLTN			844	0.00166786	2	VDNKFTKEVPNESDQIFLLPNLNDYQVLAFLHSLRD			844	0.00599844	3	VDNKFYKELSTAVYEIFALPNLNANQVIAFVCSLFD			844	0.00194769	1	VDNKFNKEWDSAINEITRLPNLNGIQESAFIVSLGN							0.00219208	0.001		0.00266786	0.001		0.001	0.00293446		0.001	0.00279459
845	0.00119208	1	VDNKFYKELPDAIFEIFSLPNLNDYQRVAFIFSLFD			845	0.00166786	2	VDNKFTKEVPNASDQIFLLPNLNDYQVLAFLHSLRD			845	0.00599844	3	VDNKFSKEVCDAIHEIHFLPNLNDAQRIAFIFSLFD			845	0.00194769	1	VDNKFNKEWDSAVSEILVLPNLNLIQGDAFVLSLVD							0.0188812	0.010639		0.001	0.00308121		0.001	0.001		0.001	0.001
846	0.00119208	1	VDNKFYKELPDAIFEIFSLPNLNVRQITAFVRSLDD			846	0.00166786	2	VDNKFTKEVPNASDQIFLPPNLNDYQVLAFLHSLRD			846	0.00599844	3	VDNKFSKEVVDATIEIHYLPNLNRDQKCAFIFSLFD			846	0.00194769	1	VDNKFNKEWDSASYEISRLPNLNARQLVAFVRSLSD							0.001	0.0026065		0.00933931	0.0176497		0.001	0.001		0.001	0.001
847	0.00119208	1	VDNKFYKELRDADGQITDLPNLNPPQGPAFVSSLID			847	0.00166786	2	VDNKFTKEVPNASDQIFLLTNLNDYQVLAFLHSLRD			847	0.00599844	3	VDNKFSKEVDSAVFEIHYLPNLNRDQKCAFIFSLFD			847	0.00194769	1	VDNKFNKEWDSASVEICGLPNLNGTQGDAFLCSLVN							0.001	0.0026065		0.00433572	0.00308121		0.001	0.001		0.00294768	0.001
848	0.00119208	1	VDNKFYKELRDADGQITDLPNLNVYQVSAFIDSLTN			848	0.00166786	2	VDNKFTKEVPNASDQIFLLPNSNDYQVLAFLHSLRD			848	0.00599844	3	VDNKFSKEVDSAVFEIHILPNLNDYQRVAFIFSLFD			848	0.00194769	1	VDNKFNKEWDSASYEICYLPNLNATQESAFVNSLGN							0.001	0.0026065		0.0160108	0.0134873		0.0589849	0.0570994		0.001	0.001
849	0.00119208	1	VDNKFYKELRDADGQITDLPNLNVYQVSAFIDSLSD			849	0.00166786	2	VDNKFTKEVPNASDQIFLLPNLNISQERAFIISLNN			849	0.00599844	3	VDNKFSKEVGTAVAEIHFLPNLNQVQRVAFIFSLFD			849	0.00194769	1	VDNKFNKEWANATSQITSLPNLNVDQGLAFVHSLPD							0.00219208	0.001		0.001	0.001		0.00299948	0.001		0.001	0.001
850	0.00119208	1	VDNKFYKELADAAGQIIFLPNLNVYQRVAFVDSLDD			850	0.00166786	2	VDNKFTKEVPNASDQIFLLPNLNLSQVLAFLHSLRD			850	0.00599844	3	VDNKFSKEVVDATIEIHYLPNLNRDQKCAFIFSLFD			850	0.00194769	1	VDNKFNKEWANAVTQILSLPNLNHDQGFAFLRSLDN							0.001	0.0026065		0.001	0.00516242		0.001	0.001		0.001	0.00279459
851	0.00119208	1	VDNKFYKELADASGEILFLPNLNEHQGGAFVVSLNN			851	0.00166786	2	VDNKFTKEVPNASDQIFLLPNLNDHQVLAFLHSLRD			851	0.00599844	3	VDNKFSKEVVNATIEIHYLPNLNRDQKCAFIFSLFD			851	0.00194769	1	VDNKFNKEWANASSQIIRLPNLNESQLPAFVASLNN							0.00338416	0.001		0.00266786	0.001		0.00299948	0.00486892		0.001	0.00279459
852	0.00119208	1	VDNKFYKELGAAMDD			852	0.00166786	2	VDNKFTKEVPNASDQIFLLPNLNDYQIVAFIRSLDN			852	0.00599844	3	VDNKFSKEVVDATIEIHYLPNLNRDQKCAFIFSLFD			852	0.00194769	1	VDNKFNKEWANATTQIIGLPNLNPLQVPAFVTSLCD							0.001	0.0026065		0.00266786	0.001		0.001	0.00293446		0.001	0.001
853	0.00119208	1	VDNKFYKELVYAFNEIVSLPNLNGCQKGAFVHSLGD			853	0.00166786	2	VDNKFTKEVPNASDQIFLLPNLNDYQMLAFLHSLRD			853	0.00599844	3	VDNKFSKEVVDATIEIHYLPNLNPCQKVAFIFSLFD			853	0.00194769	1	VDNKFNKEWANATSQIVYLPILNGCQLVAFVNSLDD							0.00219208	0.001		0.001	0.001		0.001	0.00293446		0.001	0.001
854	0.00119208	1	VDNKFYKELYYATLQISHLPNLNLTQVTAFLSSLSN			854	0.00166786	2	VDNKFTKEVPNASDQIFLLPNLNDYQERAFIISLNN			854	0.00599844	3	VDNKFSKEVVDATIEIHYLPNLNRDQKCAFIFSLFD			854	0.00194769	1	VDNKFNKEWANATSEILALPNLNVRQGVAFVPSLDN							0.00219208	0.001		0.00266786	0.001		0.001	0.001		0.001	0.001
855	0.00119208	1	VDNKFYKELCAAYVEIGSLPNLNVFQRGAFVYSLSD			855	0.00166786	2	VDNKFTKEVPNASDQIFLLPNLNDYQALAFLHSLRD			855	0.00599844	3	VDNKFSKEVVDATIEIHYLPNLNRDQKCALIFSLFD			855	0.00194769	1	VDNKFNKEWANAICQICGLPNLNVSQGHAFIDSLYN							0.001	0.0026065		0.001	0.001		0.001	0.001		0.001	0.001
856	0.00119208	1	VDNKFYKELCSATLEIHYLPNLNLLQKYAFVSSLRD			856	0.00166786	2	VDNKFTKEVPNASDQIFLLPNLNDYQVIAFLHSLRD			856	0.00599844	3	VDNKFSKEVVDATIEIHYLPNLNRDQKCAFTFSLFD			856	0.00194769	1	VDNKFNKEWANAADQIFRLPNLNGNQGFAFVISLDN							0.00219208	0.001		0.001	0.001		0.001	0.001		0.001	0.001
857	0.00119208	1	VDNKFYKELCSADREIFFLPNLNGTQEAAFVGSLVD			857	0.00166786	2	VDNKFTKEVPNASDQIFLLPNLNDYQVLAFVISLNN			857	0.00599844	3	VDNKFSKEVVDATIEIHYLPNLNRDQKCAFIFSLFD			857	0.00194769	1	VDNKFNKEWANAVTEICHLPNLNRRQELAFVGSLHN							0.00934456	0.0026065		0.00266786	0.001		0.00299948	0.001		0.001	0.001
858	0.00119208	1	VDNKFYKELFDATLEIVYLPNLNGGQKRAFLSSLDD			858	0.00166786	2	VDNKFTKEVPNASDQIFLLPNLNDYQVLPSYTACVT			858	0.00599844	3	VDNKFSKEVVDATIEIHYLPNLNRDQKCAFIFSLFD			858	0.00194769	1	VDNKFNKEWANASLEILACRT*TTIRNLPSYVACTM							0.00219208	0.001		0.00433572	0.00724363		0.001	0.001		0.00294768	0.001
859	0.00119208	1	VDNKFYKELFDATLEIVYLPNLNVIQEGAFVSSLCN			859	0.00166786	2	VDNKFTKEVPNASDQIFLLPNLNDYQVLAYLHSLRD			859	0.00599844	3	VDNKFSKEVVDATIEIHYLPNLNRDQKCAFIVSLWD			859	0.00194769	1	VDNKFNKEWANASYQICGLPNLNECQEDAFIYSLYD							0.00219208	0.001		0.00266786	0.001		0.001	0.00293446		0.001	0.00279459
860	0.00119208	1	VDNKFYKELFDATLEIVYLPNLNVIQEGAFVSSLCD			860	0.00166786	2	VDNKFTKEVPNASDQIFLLPNLNDYQVLAFLHSLID			860	0.00599844	3	VDNKFSKEVVDATIEIHYLPNLNRDQKCAFILACSM			860	0.00194769	1	VDNKFNKEWATAIFEICALPNLNRTQGSAFIYSLRD							0.00219208	0.0026065		0.00600359	0.001		0.001	0.00293446		0.00294768	0.001
861	0.00119208	1	VDNKFYKELFYAFNQIRDLPNLNGIQVGAFLVSLDD			861	0.00166786	2	VDNKFTKEVPNASDQIFLLPNLNDYQVLAFLHSLGN			861	0.00599844	3	VDNKFSKEVVDATIEIHYLPNLNRDQKCAFIFRLFD			861	0.00194769	1	VDNKFNKEWATAIFEICALPNLNRTQGSAFIPSLPN							0.001	0.0026065		0.00266786	0.001		0.001	0.00680338		0.001	0.00638377
862	0.00119208	1	VDNKFYKELFSAVHQITLLPNLNAVQRRAFIGSLFN			862	0.00166786	2	VDNKFTKEVPNASDQIFLLPNLNDYQVLAFLHSLRD			862	0.00599844	3	VDNKFSKEVVDATIEIHYLPNLNRDQKCAFIFSLFN			862	0.00194769	1	VDNKFNKEWATATLEIVRLPNLNANQLNAFVPSLLD							0.00219208	0.001		0.001	0.001		0.00299948	0.001		0.001	0.001
863	0.00119208	1	VDNKFYKK*VPHLIKLVICRT*TPVR*MPSYSA*LM			863	0.00166786	2	VDNKFTKEVPNASDQIFLLPNLNDYQVLAFLHGLRD			863	0.00599844	3	VDNKFSKEVVDATIEIHYLPNLNRDQKCAFIFSLFN			863	0.00194769	1	VDNKFNKEWATATLQILNLPNLNRIQGDAFLNSLSN							0.001	0.0026065		0.001	0.001		0.001	0.001		0.001	0.001
864	0.00119208	1	VDNKFSKEGNSAAVQISTLPNLNPVQGCAFVNSLCN			864	0.00166786	2	VDNKFTKEVPNASDQIFLLPNLNDYQVLAFLRSLRD			864	0.00599844	3	VDNKFSKEVVDATIEIHYLPNLNRDQKCAFIFSLFN			864	0.00194769	1	VDNKFNKEWATAIAQIVGLPNLNAYQGPAFVTSLSD							0.00219208	0.001		0.001	0.001		0.001	0.0126068		0.001	0.00279459
865	0.00119208	1	VDNKFSKEGNAANYQIAYLPNLNLCQKDAFLYSLYN			865	0.00166786	2	VDNKFTKEVPNASDQIFLLPNLNDYQVLAFLHSLRD			865	0.00599844	3	VDNKFSKEVVDATIEIHYLPNLNRDQKCAFIRSLDN			865	0.00194769	1	VDNKFNKEWATAVCQILSLPNLNGCQQCAFVYSLAD							0.00338416	0.001		0.00266786	0.00308121		0.001	0.001		0.001	0.001
866	0.00119208	1	VDNKFSKEGIAAAFEIRTLPNLNACQLGAFLSSLSN			866	0.00166786	2	VDNKFTKEVPNASDQIFLLPNLNDYLVLAFLHSLRD			866	0.00599844	3	VDNKFSKEVVDATIEIHYLPNLNRDQKCAFIFSLFD			866	0.00194769	1	VDNKFNKEWATAVCQILSLPNLNVVQEAAFLSSLGD							0.109479	0.111849		0.001	0.00308121		0.001	0.001		0.001	0.001
867	0.00119208	1	VDNKFSKEGIAAAFEIRALPNLNGVQMHAFVGSLGD			867	0.00166786	2	VDNKFTKEVPNASDQIFLLPNLNGYQVLAFLHSLRD			867	0.00599844	3	VDNKFSKEVVDATIEIHYLPNLNRDQKCAFVVSLFD			867	0.00194769	1	VDNKFNKEWATAVLQIANLPNLNVGQRFAFVPSLVD							0.001	0.0026065		0.00266786	0.001		0.001	0.001		0.001	0.001
868	0.00119208	1	VDNKFSKEGHTAVFQIRFLPNLNVSQVAAFVRSLDN			868	0.00166786	2	VDNKFTKEVPNASDQIFLLPNLNVRQGDAFIFSLID			868	0.00599844	3	VDNKFSKEVVDATIEIHYLPNLNRDQKCAFVVSLCD			868	0.00194769	1	VDNKFNKEWATASAEICHLPNLNHSQGLAFVRSLGD							0.001	0.0026065		0.00266786	0.001		0.001	0.00486892		0.001	0.001
869	0.00119208	1	VDNKFSKEGADAILQIGNLPNLNVYQIVAFIRSLDN			869	0.00166786	2	VDNKFTKEVPNASDQIFLLPNLTDYQVLAFLHSLRD			869	0.00599844	3	VDNKFSKEVVDATIEIHYLPNLNRDQKCAFVNSLFD			869	0.00194769	1	VDNKFNKEWATASIQIGCLPNLNLVQEAAFICSLHD							0.00576832	0.00581951		0.001	0.00308121		0.001	0.00293446		0.00294768	0.001
870	0.00119208	1	VDNKFSKEGAAADSQIPCLPNLNVLQGAAFICSLSN			870	0.00166786	2	VDNKFTKEVPNASDQIFLLPNLSDYQVLAFLHSLRD			870	0.00599844	3	VDNKFSKEVVDATIEIHYLPNLNDAQRIAFIFSLFD			870	0.00194769	1	VDNKFNKEWADASREISALPNLNRDQGVAFLVSLSD							0.0343782	0.0026065		0.00266786	0.001		0.00299948	0.001		0.001	0.001
871	0.00119208	1	VDNKFSKEGGDAAHQICNLPNLNVYQIVAFIRSLDN			871	0.00166786	2	VDNKFTKEVPNASDQIFLLPNLNDYQVLAFLHSLRD			871	0.00599844	3	VDNKFSKEVVDATIEIHYLPNLNDAQMIAFIFSLFD			871	0.00194769	1	VDNKFNKEWADASRQILFLPNLNAIQLHAFVSSLCD							0.00338416	0.001		0.001	0.00724363		0.0149964	0.001		0.00294768	0.001
872	0.00119208	1	VDNKFSKEGYNAAGQIFYLPNLNARQKPAFLVSLCD			872	0.00166786	2	VDNKFTKEVPNVSDQIFLLPNLNDYQVLAFLHSLRD			872	0.00599844	3	VDNKFSKEVVDATIEIHYLPNLNVFQRLAFIFSLFD			872	0.00194769	1	VDNKFNKEWADASVQILCLPNLNHTQMGAFIDSLSD							0.001	0.00421301		0.00266786	0.001		0.001	0.001		0.001	0.001
873	0.00119208	1	VDNKFSKEGFDAYGEICHLPNLNDDQVYAFIGSLNN			873	0.00166786	2	VDNKFTKEVRNASDQIFLLPNLNDYQVLAFLHSLRD			873	0.00599844	3	VDNKFSKEVVDATIEIHYLPNLSRDQKCAFIFSLFD			873	0.00194769	1	VDNKFNKEWADASFEIINLPNLNPGQEHAFIHSLAN							0.00219208	0.001		0.001	0.001		0.001	0.001		0.001	0.001
874	0.00119208	1	VDNKFSKEVSYAVHQIRDLPNLNGVQLVAFVHSLGD			874	0.00166786	2	VDNKFTKELPNASDQIFLLPNLNDYQVLAFLHSLRD			874	0.00599844	3	VDNKFSKEVVDATIEIHYLPSLNRDQKCAFIFSLFD			874	0.00194769	1	VDNKFNKEWADAILQISGLPNLNLVQGSAFIHSLSD							0.001	0.0026065		0.00266786	0.001		0.001	0.00293446		0.00294768	0.001
875	0.00119208	1	VDNKFSKEVSAAICEISYLPNLNACQERAFLHSLLD			875	0.00166786	2	VDNKFTKELCSAADEIFVLPNLNDYQVLAFLHSLRD			875	0.00599844	3	VDNKFSKEVVDATIEIHCLPNLNRDQKCAFIFSLFD			875	0.00194769	1	VDNKFNKEWADAVNEIIRLPNLNQFQGCAFLTSLTD							0.00219208	0.001		0.001	0.001		0.001	0.001		0.001	0.00279459
876	0.00119208	1	VDNKFSKEVSYAFREIVILPNLNSRQKPAFIVSLRD			876	0.00166786	2	VDNKFTKEVPNASDQIFLLPNLNDYQVLAFLHSLRD			876	0.00599844	3	VDNKFSKEVVDATIEIHFLPNLNDAQRIAFIFSLFD			876	0.00194769	1	VDNKFNKEWADAVHEIGRLPLNGCQVPAFVGSLVD							0.00219208	0.001		0.001	0.001		0.00299948	0.001		0.001	0.001
877	0.00119208	1	VDNKFSKEVSSASTEIVGLPNLNAHQVIAFLGSLIN			877	0.00166786	2	VDNKFTKVVPNASDQIFLLPNLNDYQVLAFLHSLRD			877	0.00599844	3	VDNKFSKEVVDATIEIHFLPNLNDAQRIAFIFSLFD			877	0.00194769	1	VDNKFNKEWADASDQISRLPNLNLVQGNAFVNSLSD							0.00219208	0.0026065		0.00266786	0.001		0.001	0.001		0.001	0.00279459
878	0.00119208	1	VDNKFSKEVINAVCQIFILPNLNGLQQPAFVRSLVN			878	0.00166786	2	VDNKFTKEGNDAADEIFILPNLNVTQVYAFLSSLRN			878	0.00599844	3	VDNKFSKEVVDATIEIHFLPNLNDAQRIAFIFSLFD			878	0.00194769	1	VDNKFNKEWADASDQILDLPNLNDDQGIAFLCSLYN							0.00219208	0.001		0.001	0.001		0.001	0.001		0.001	0.001
879	0.00119208	1	VDNKFSKEVIDANRQIVVLPNLNGAQRTAFLLSLNN			879	0.00166786	2	VDNKFYKELPNASDQIFLLPNLNDYQVLAFLHSLRD			879	0.00599844	3	VDNKFSKEVVDATIGIHYLPNLNRDQKCAFIFSLFD			879	0.00194769	1	VDNKFNKEWADASYQISRLPNLNHVQGFAFVGSLDD							0.00457624	0.001		0.001	0.00308121		0.001	0.001		0.001	0.001
880	0.00119208	1	VDNKFSKEVHYAICQILVLPNLNLDQMGAFIVSLRD			880	0.00166786	2	VDNKFYKELCSAADQIFLLPNLNDYQVLAFLHSLRD			880	0.00599844	3	VDNKFSKEVVDAIHEIHFLPNLNDAQRIAFIFSLFD			880	0.00194769	1	VDNKFNKEWADASYEILNLPNLNPSQMFAFVLSLDD							0.00219208	0.001		0.001	0.001		0.001	0.001		0.001	0.001
881	0.00119208	1	VDNKFSKEVRDAYAQIGNLPNLNVYQIVAFIRSLDN			881	0.00166786	2	VDNKFYKELCSAADEIFVLPNLNDDQVLDFINSLRN			881	0.00599844	3	VDNKFSKEV*DAIHEIHFLPNLNDAQRIAFIFSLFD			881	0.00194769	1	VDNKFNKEWADASYEILNLPNLNGIQVDAFVRSLHN							0.001	0.0026065		0.001	0.00308121		0.001	0.00680338		0.0146338	0.0135621
882	0.00119208	1	VDNKFSKEVDNAYAQILNLPNLNVVQLYAFVSSLTN			882	0.00166786	2	VDNKFYKELCSAADEIFVLPNLNDDQVLAFINSLNN			882	0.00599844	3	VDNKFSKEVCDEIHEIHFLPNLNDAQRIAFIFSLFD			882	0.00194769	1	VDNKFNKEWAAAVAQIACLPNLNECQGAAFVRSLSN							0.001	0.0026065		5.60335	9.61202		0.00299948	0.001		0.00294768	0.001
883	0.00119208	1	VDNKFSKEVDNAYAQILNLPNLNVVQLYAFVSSLTN			883	0.00166786	2	VDNKFYKELCSAADEIFVLPNLNDDQVLAFINSLRN			883	0.00599844	3	VDNKFSKEVCDAIHEIHFLPNLNHDQVVAFVVSLFD			883	0.00194769	1	VDNKFNKEWAAAVAQIACLPNLNECQGAAFVRSLAD							0.00338416	0.001		0.0627109	0.0197309		0.001	0.00293446		0.001	0.00279459
884	0.00119208	1	VDNKFSKEVDDAYDQIRSLPNLNELQEAAFLFSLSD			884	0.00166786	2	VDNKFYKELCSAADEIFVLPNLNDGQVLAFINSLRN			884	0.00599844	3	VDNKFSKEVCDAIHEIHFLPNLNDAQRHAFIFSLFD			884	0.00194769	1	VDNKFNKEWAAAVAQIACLPNLNECQGAAFVRSLYN							0.001	0.0026065		0.001	0.001		0.001	0.00293446		0.00294768	0.001
885	0.00119208	1	VDNKFSKEVDNAINEIGDLPNLNVYQIIAFVRSLSD			885	0.00166786	2	VDNKFYKELCSAADEIFVLPNLNDYQVLTFLHSLRD			885	0.00599844	3	VDNKFSKEVCDAIHEIHFLPNLNDAQRIAFIFSLFD			885	0.00194769	1	VDNKFNKEWAAAVAQIACLPNLNECQGAAFVYSLDD							0.00219208	0.001		0.001	0.001		0.001	0.00486892		0.001	0.001
886	0.00119208	1	VDNKFSKEVDYASDQIRGLPNLNAGQRSAFVLSLAN			886	0.00166786	2	VDNKFYKELFNAAFEIVSLPNLNLSQERAFLHSLRD			886	0.00599844	3	VDNKFSKEVCDAIHEIHFLPNLNDAQRIAFVCSLFD			886	0.00194769	1	VDNKFNKEWAAAVAQIACLPNLNGDQGAAFLSSLSN							0.00338416	0.001		0.001	0.001		0.001	0.001		0.00294768	0.001
887	0.00119208	1	VDNKFSKEVDYASDQIRGLPNLNAGQRSAFVLSLAN			887	0.00166786	2	VDNKFYKELFNAAFEIVSLPNLNDYQVLAFLHSLRD			887	0.00599844	3	VDNKFSKEVCDAIHEIHFLPNLNDAQSIAFIFSLFD			887	0.00194769	1	VDNKFNKEWAAAVAQIACLPNLNGVQEDAFLVSLND							0.00219208	0.0026065		0.001	0.001		0.001	0.00293446		0.00294768	0.00279459
888	0.00119208	1	VDNKFSKEVGQRSS*NCWSAELKRASETCLPRQPV*			888	0.00166786	2	VDNKFYK*LCSAADEIFVLPNLNDDQVLAFINSLRN			888	0.00599844	3	VDNKFSKEVCDAIHEIHFLPNLNEPQVCAFVVSLCD			888	0.00194769	1	VDNKFNKEWAAAVAQIASLPNLNDPQGRAFVTSLGD							0.001	0.0026065		0.001	0.001		0.001	0.001		0.001	0.001
889	0.00119208	1	VDNKFSKEVVDATTEIHYLPNLNRDQKCAFIFSLFD			889	0.00166786	2	VDNKFYKEWGYASNQIYVLPNLNLVQIRAFISSLCD			889	0.00599844	3	VDNKFSKEVCDAIHEIHFLPNLNVDQRHAFIFSLFD			889	0.00194769	1	VDNKFNKEWAAAVAEICGLPNLNVLQGSAFVGSLRN							0.00219208	0.001		0.001	0.001		0.001	0.001		0.001	0.001
890	0.00119208	1	VDNKFSKEVVDATIEIHYLPNLNRDQKCAFIFSLFD			890	0.00166786	2	VDNKFYKELNDAAYQIATLPNLNEVQERAFVNSLRD			890	0.00599844	3	VDNKFSKEVCDAIHQIHFLPNLNDAQRIAFIFSLFD			890	0.00194769	1	VDNKFNKEWAAASNEIVNLPNLNGGQGCAFVLSLDD							0.001	0.00421301		0.001	0.00308121		0.001	0.001		0.001	0.001
891	0.00119208	1	VDNKFSKEVVDATIEIHYLPNLNPCQKVAFIFSLFD			891	0.00166786	2	VDNKFYKELCYAYVQICGLPNLNQNQKYAFVSSLRD			891	0.00599844	3	VDNKFSKEVCYAIHEIHFLPNLNDAQRIAFIFSLFD			891	0.00194769	1	VDNKFNKEWAAASDEISALPNLNEDQECAFVCSLDN							0.00219208	0.001		0.001	0.001		0.001	0.001		0.001	0.001
892	0.00119208	1	VDNKFSKEVVDATIEIHYLPNLNRDQKCAFIVSLWD			892	0.00166786	2	VDNKFSKELTNAVREIAGLPNLNVSQKTAFVGSLRD			892	0.00599844	3	VDNKFSKEVCDAIVEIHFLPNLNVDQRHAFIFSLFD			892	0.00194769	1	VDNKFNKEWAAATFEIFRLPNLNAGQQGAFVVSLDN							0.00219208	0.001		0.001	0.001		0.001	0.001		0.001	0.001
893	0.00119208	1	VDNKFSKEVVDATIEIHYLPNLNLDQKCAFIFSLFD			893	0.00250179	3	VDNKLTKEVPNASDQIFLLPNLNDYQVLAFLHSLRD			893	0.00599844	3	VDNKFSKEVVDATIEIHYLPNLNRDQKCAFIFSLFD			893	0.00194769	1	VDNKFNKEWAAAIREIIRLPNLNGSQMSAFVVSLDD							0.00219208	0.001		0.001	0.00308121		0.001	0.00293446		0.001	0.001
894	0.00119208	1	VDNKFSKEVVDATIEIHYLPNLNARQKPAFLVSLCD			894	0.00250179	3	VDNKFNKEVPNASDQIFLLPNLNLSQERAFIISLNN			894	0.00599844	3	VDNKFSKEVLNAYSEIFLLPNLNVDQILAFVLSLDN			894	0.00194769	1	VDNKFNKEWAAAVLQITCLPNLNECQGSAFVLSLSN							0.001	0.0026065		0.00266786	0.001		0.001	0.001		0.001	0.001
895	0.00119208	1	VDNKFSKEVCTADIEIIALPNLNVYQIVAFIRSLDN			895	0.00250179	3	VDNKFNKEVPNASDQIFLLPNLNDDQVLAFINSLRN			895	0.00799792	4	VDNKFNKELVDAIFEIFVLPNLNESQVSAFVVSLFD			895	0.00194769	1	VDNKFNKEWAAAVLEILALPNLNPFQEAAFICSLCN							0.00219208	0.001		0.001	0.001		0.001	0.001		0.00294768	0.001
896	0.00119208	1	VDNKFSKEVCDAVAEILVLPNLNLCQGGAFIVSLWD			896	0.00250179	3	VDNKFNKEVPNASDQIFLLPNLNDYQVLAFINSLRN			896	0.00799792	4	VDNKFYKEVCDAIHEIHFLPNLNDAQRIAFIFSLFD			896	0.00194769	1	VDNKFNKEWAAAVDEIVNLPNLNGCQEGAFLFSLAD							0.00338416	0.00903252		0.00266786	0.00308121		0.001	0.0126068		0.001	0.001
897	0.00119208	1	VDNKFSKEVCDAIHEIHFLPNLNDPQRIAFIFSLFD			897	0.00250179	3	VDNKFNKEVPNASDQIFLLPNLNDYQVLAFLHSLRN			897	0.00799792	4	VDNKFYKELSTAVYEIFALPNLNDAQRIAFIFSLFD			897	0.00194769	1	VDNKFNKEWAAAVTEILHLPNLNGNQGPAFVGSLVD							0.00338416	0.001		0.001	0.001		0.00899792	0.00680338		0.001	0.001
898	0.00119208	1	VDNKFSKEVCDAIHEIHFLPNLNDAQRIAFIFSLTN			898	0.00250179	3	VDNKFNKELFNAAFEIVSLPNLNLSQERAFIISMNN			898	0.00799792	4	VDNKFSKEVDSAVFEIHILPNLNDYQRVAFIFSLFD			898	0.00194769	1	VDNKFNKEWAAAVRQICSLPNLNLHQEFAFVGSLYD							0.001	0.00421301		0.001	0.00308121		0.001	0.001		0.001	0.001
899	0.00119208	1	VDNKFSKEVCDAIHEIHFLPNLNDAQRIAFIFSLCD			899	0.00250179	3	VDNKFNKELFNAAFEIVSLPNLNLSQERAFIISLNN			899	0.00799792	4	VDNKFSKEVVDANIEIHYLPNLNRDQKCAFIFSLFD			899	0.00194769	1	VDNKFNKEWAAASIEISALPNLNQGQGDAFVPSLVD							0.00338416	0.010639		0.001	0.001		0.00299948	0.001		0.001	0.001
900	0.00119208	1	VDNKFSKEVCDAIHEIHFLPNLNDAQRIAFIFSLFD			900	0.00250179	3	VDNKFNKELFNAAFEIVSLPNLNLSQERAFIISLRN			900	0.00799792	4	VDNKFSKEVVDATIEIHYLPNLNRDQKCAFIFSLFD			900	0.00194769	1	VDNKFNKEWAAASHQISSLPNLNGCQGIAFVRSLVN							0.001	0.00742601		0.001	0.00308121		0.001	0.00293446		0.001	0.00279459
901	0.00119208	1	VDNKFSKEVCDAIHEIHFLPNLNDAQRIAFIFSLTN			901	0.00250179	3	VDNKFNKELFNAAFEIVSLPNLNLSQERAFIISLNN			901	0.00799792	4	VDNKFSKEVVDATTEIHYLPNLNRDQKCAFIFSLFD			901	0.00194769	1	VDNKFNKEWAAASREILRLPNLNPAQGDAFIFSLHD							0.001	0.0026065		0.00266786	0.001		0.001	0.00486892		0.00294768	0.001
902	0.00119208	1	VDNKFSKEVCDAIHEIHFLPNLNDAQRIAFLFSLCD			902	0.00250179	3	VDNKFNKELFNAAFEIVSLPNLNLSQELAFVISLNN			902	0.00799792	4	VDNKFSKEVVDATIEIHYPPNLNRDQKCAFIFSLFD			902	0.00194769	1	VDNKFNKEWAYAASEILSLPNLNEVQQSAFVGSLGN							0.00338416	0.001		0.0143429	0.00308121		0.001	0.001		0.001	0.001
903	0.00119208	1	VDNKFSKEVCDAIHEIHFLPNLNDAQIVAFIRSLDN			903	0.00250179	3	VDNKFTKEVTNASDQIFLLPNLNDYQVLAFLHSLRD			903	0.00799792	4	VDNKFSKEVVDATIEIHYLPNLNRDQKCAFIFSLFD			903	0.00194769	1	VDNKFNKEWAYASIEILGLPNLNDRQGVAFIPSLGD							0.00219208	0.001		0.001	0.00308121		0.001	0.00680338		0.001	0.00279459
904	0.00119208	1	VDNKFSKEVCDAIHEIHFLPNLNDAQISAFLISLVD			904	0.00250179	3	VDNKFTKEVPNASDQIFLLPNLNDYQVLAFLHSLRD			904	0.00799792	4	VDNKFSKEVVDATIEIHYLPNLNHDQVVAFVVSLFD			904	0.00194769	1	VDNKFNKEWAYASHEISRLPNLNACQQSAFVHSLVN							0.00219208	0.001		0.001	0.00308121		0.0109974	0.001		0.001	0.00458918
905	0.00119208	1	VDNKFSKEVCDAIHEIHFLPNLNEHQIGAFITSLHD			905	0.00250179	3	VDNKFTKEVPNASDQISLLPNLNDYQVLAFLHSLRD			905	0.00799792	4	VDNKFSKEVVDATIEIHYLPNLNPSQRLAFIFSLFD			905	0.00194769	1	VDNKFNKEWAYATLQITRLPNLNDSQGCAFVHSLGD							0.00219208	0.00421301		0.001	0.001		0.001	0.001		0.00294768	0.001
906	0.00119208	1	VDNKFSKEVCDAIHEIHFLPNLNVDQRHAFIFSLFD			906	0.00250179	3	VDNKFTKEVPNASDQIFILPNLNDYQVLAFLHSLRD			906	0.00799792	4	VDNKFSKEVVDATIEIHYLPNLNRDQKCDFIFSLFD			906	0.00194769	1	VDNKFNKEWAYAIIQICSLPNLNAHQEGAFVSSLGD							0.00219208	0.001		0.0110072	0.00932484		0.00299948	0.0106723		0.001	0.00279459
907	0.00119208	1	VDNKFSKEVCDAIHEIHFLPNLNVYQIVAFIFSLFD			907	0.00250179	3	VDNKFTKEVPNASDQIFLLPNLNDYQVLAFLHSLRD			907	0.00799792	4	VDNKFSKEVVDATIEIHYLPNLNRDQKCAFIFSLFD			907	0.00194769	1	VDNKFNKEWAYAICQICSLPNLNATQGHAFISSLDD							0.001	0.0026065		0.001	0.001		0.001	0.001		0.001	0.001
908	0.00119208	1	VDNKFSKEVCDAIHEIHFLPNLNVYQIVAFIRSLHN			908	0.00250179	3	VDNKFTKEVPNASDQIFLLPNLNDYQVLAFLHSLRD			908	0.00799792	4	VDNKFSKEVVDATIEIHYLPNLNRDQKCAFILSLFD			908	0.00194769	1	VDNKFNKEWAYAVTEILSLPNLNVDQRGAFIRSQPGQ							0.001	0.0026065		0.00266786	0.001		0.00299948	0.001		0.001	0.00458918
909	0.00119208	1	VDNKFSKEVCDAIHEIHFLPNLNVRQITAFVRSLDD			909	0.00250179	3	VDNKFTKEVPNASDQIFLLPNLNDYQVLAFLHSLRD			909	0.00799792	4	VDNKFSKEVVDATIEIHYLPNLNRDQKCAFIFSLLD			909	0.00194769	1	VDNKFNKEWAYAVRQIISLPNLNQSQLGAFVVSLPN							0.001	0.0026065		0.00266786	0.001		0.001	0.00293446		0.001	0.00279459
910	0.00119208	1	VDNKFSKEVCDAYAQIGNLPNLNVYQIVAFIFSLFD			910	0.00250179	3	VDNKFTKEVPNASDQIFLLPNLNDYQVLTFLHSLRD			910	0.00799792	4	VDNKFSKEVVDATIEIHYLPNLNRDQKCAFIFSLFD			910	0.00194769	1	VDNKFNKEWAYAVYEILALPNLNQSQQRALHPQPA*							0.00934456	0.001		0.00266786	0.00308121		0.00299948	0.001		0.001	0.001
911	0.00119208	1	VDNKFSKEVCDAYAQIGNLPNLNVYQIVAFINSLSN			911	0.00250179	3	VDNKFTKEVPNASDQIFLLPNLNDYQVLASLHSLRD			911	0.00799792	4	VDNKFSKEVVDATIEIHYLPNLNRDQKCVFIFSLFD			911	0.00194769	1	VDNKFNKEWAYASSQIILLPNLNPVQEGAFIVSLSN							0.00219208	0.001		0.171122	0.152928		0.001	0.001		0.001	0.001
912	0.00119208	1	VDNKFSKEVCDAYAQIGNLPNLNVYQIVAFIRSLHN			912	0.00250179	3	VDNKFTKEVPNASDQIFLLPNLNDYQVLAFLHRLRD			912	0.00799792	4	VDNKFSKEVVDATIEIHYLPNLNRDQRCAFIFSLFD			912	0.00194769	1	VDNKFNKEWAYASFQILGLPNLNRVQGGAFIHSLND							0.001	0.0026065		0.00433572	0.001		0.001	0.001		0.001	0.001
913	0.00119208	1	VDNKFSKEVFSASSQITVLPNLNREQGGAFIVSLWD			913	0.00250179	3	VDNKFTKEVPNASDQIFLLPNLNDYQVLAFLHSLRD			913	0.00799792	4	VDNKFSKEVVDATIEIHYLPNLNRYQKCAFIFSLFN			913	0.00194769	1	VDNKFNKEWAYASFQILGLPNLNAAQRAAFVCSLHD							0.001	0.0026065		0.00266786	0.001		0.00299948	0.00873784		0.001	0.001
914	0.00119208	1	VDNKFSKEWNDAVSQICPLPNLNRSQRGAFVGSLVD			914	0.00250179	3	VDNKFTKEVPNASDQIFLLPNLNDYQVLAFLHSLPNLNLSQERAFIISLNN			914	0.00799792	4	VDNKFSKEVVDATIEIHYLPNLNDAQRIAFIFSLFD			914	0.00194769	1	VDNKFNKEWASATAQIGGLPNLNEDQGIAFLDSLSN							0.001	0.0026065		0.001	0.001		0.00299948	0.001		0.001	0.001
915	0.00119208	1	VDNKFSKEWNAAIHQICHLPNLNAFQEDAFVGSLIN			915	0.00250179	3	VDNKFTKEVPNASDQIFLLPNLNDYQVLAFLHSLRN			915	0.00799792	4	VDNKFSKEVVDATIEIHYLPNLNRDQKCAFIFSLFD			915	0.00194769	1	VDNKFNKEWASAANQIISLPNLNGVQEGAFLVSLND							0.00219208	0.001		0.00266786	0.001		0.001	0.00486892		0.001	0.001
916	0.00119208	1	VDNKFSKEWNDAVREICCLPNLNGYQGDAFLGSLIN			916	0.00250179	3	VDNKFTKEVPNASDQIFLLPNLNDYQVLAFLHSLFD			916	0.00799792	4	VDNKFSKEVVDATIEIHFLPNLNDAQRIAFIFSLFD			916	0.00194769	1	VDNKFNKEWASAANQIISLPNLNGRQMDAFVDSLVN							0.001	0.00421301		0.001	0.001		0.00299948	0.001		0.00294768	0.001
917	0.00119208	1	VDNKFSKEWNSAICEIHVLPNLNADQMDAFVYSLRD			917	0.00250179	3	VDNKFTKEVPNASDQIFLLPNLNDYQVLAFLHILRD			917	0.00799792	4	VDNKFSKEVVDATIEVHYLPNLNRDQKCAFIFSLFD			917	0.00194769	1	VDNKFNKEWASAVREIHNLPNLNVHQEDAFISSLGD							0.00219208	0.001		0.001	0.001		0.001	0.001		0.001	0.001
918	0.00119208	1	VDNKFSKEWSNAASEIIALPNLNDSQECAFVLSLNN			918	0.00250179	3	VDNKFTKEVPNASDQIFLLPNLNDYQVLAFLYSLRD			918	0.00799792	4	VDNKFSKEVVDATIEIHYLPNLNRDQKCAFIFSLFD			918	0.00194769	1	VDNKFNKEWASAVYQICDLPNLNGVQGRAFVRSLTD							0.00219208	0.001		0.00266786	0.001		0.001	0.00680338		0.00294768	0.001
919	0.00119208	1	VDNKFSKEWSAAACEIAHLPNLNASQRAAFITSLDN			919	0.00250179	3	VDNKFTKEVPNASDQIFLLPNLNDYQVLAFLHSLRD			919	0.00799792	4	VDNKFSKEVCDAIHEIHILPNLNDAQRIAFIFSLFD			919	0.00194769	1	VDNKFNKEWASATSQICYLPNLNELQGVAFVTSLGD							0.00219208	0.001		0.001	0.001		0.001	0.00293446		0.001	0.001
920	0.00119208	1	VDNKFSKEWITADVEICILPNLNEIQRSAFVFSLSD			920	0.00250179	3	VDNKFTKEVPNASDQIFLLPNLDDYQVLAFLHSLRD			920	0.00799792	4	VDNKFSKEVCDAIHEIHFLPNLNDAQRIAFIFSLFY			920	0.00194769	1	VDNKFNKEWASATLEILALPNLNPCQGLAFVDSLCD							0.00219208	0.001		0.00433572	0.00308121		0.001	0.001		0.001	0.001
921	0.00119208	1	VDNKFSKEWITADVEICILPNLNEIQRSAFVFSLLD			921	0.00250179	3	VDNKFTKEVPNASDQIFLLPSLNDYQVLAFLHSLRD			921	0.00799792	4	VDNKFSKEVCDAIHEIHFLPNLNDAQRIAFIFSLFD			921	0.00194769	1	VDNKFNKEWASAAVEILNLPNLNVCQGSAFLGSLSN							0.00338416	0.00421301		0.001	0.001		0.001	0.00293446		0.001	0.001
922	0.00119208	1	VDNKFSKEWITADVEICILPNLNEYQMFAFVDSLRD			922	0.00250179	3	VDNKFTKEVPNASDQVFLLPNLNDYQVLAFLHSLRD			922	0.00799792	4	VDNKFSKEVCDAIHEIHFLPNLNDAQRIAFIRSLDN			922	0.00194769	1	VDNKFNKEWANATRQILILPNLNEVQKTAFIGSLGD							0.001	0.0026065		0.001	0.001		0.0129969	0.101592		0.00294768	0.001
923	0.00119208	1	VDNKFSKEWITADVEICILPNLNGPQERAFVINLSD			923	0.00250179	3	VDNKFTKEVPNASGQIFLLPNLNDYQVLAFLHSLRD			923	0.00799792	4	VDNKFSKEVCDAIHEIHFLPNLNDAQMIAFIFSLFD			923	0.00194769	1	VDNKFNKEWANASYQITCLPNLNRDQESAFVRSLLD							0.00219208	0.001		0.001	0.001		0.001	0.001		0.00294768	0.001
924	0.00119208	1	VDNKFSKEWPTAVIQISDLPNLNEAQVIAFVVSLLD			924	0.00250179	3	VDNKFTKEVPTHLIKFFSCRT*TTIRCLPSYTACVT			924	0.00799792	4	VDNKFSKEVCDAIHEIHFLPNLNDYQRVAFIFSLFD			924	0.00194769	1	VDNKFNKEWANASFEICNLPNLNDFQEYAFLSSLVD							0.00457624	0.001		0.001	0.001		0.001	0.001		0.001	0.001
925	0.00119208	1	VDNKFSKEWRYAVPEICGLPNLNQIQGCAFLTSLND			925	0.00250179	3	VDNKFTKEVPDASDQIFLLPNLNDYQVLAFLHSLRD			925	0.00799792	4	VDNKFSKEVCDAIHEIHFLPNLNDSQRIAFIFSLFD			925	0.00194769	1	VDNKFNKEWANATDEIIRLPNLNGVQGYAFVDSLCN							0.00219208	0.001		0.00266786	0.001		0.001	0.00293446		0.00294768	0.001
926	0.00119208	1	VDNKFSKEWRSAACQISNLPNLNVHQLCAFVVSLVN			926	0.00250179	3	VDNKFTKEVLNASDQIFLLPNLNDYQVLAFLHSLRD			926	0.00799792	4	VDNKFSKEVCDAIHEIHFLPNLNESQIIAFVNSLFD			926	0.00194769	1	VDNKFNKEWANATAQICSLPNLNAAQESAFVVSLSD							0.00338416	0.001		0.001	0.001		0.001	0.00486892		0.001	0.00458918
927	0.00119208	1	VDNKFSKEWLDATCQICSLPNLNLSQQCAFVNSLGD			927	0.00250179	3	VDNKFYKEWCAASSEIVCQTRTR*TPSSLA*MT			927	0.00799792	4	VDNKFSKELVDAIHEIHFLPNLNDAQRIAFIFSLFD			927	0.00194769	1	VDNKFNKEWANATSEIISLPNLNRHQGDAFIGSLSD							0.00338416	0.001		0.001	0.00308121		0.001	0.00293446		0.001	0.001
928	0.00119208	1	VDNKFSKEWLSASAQILVLPNLNVLQLSAFLSKPA*			928	0.00250179	3	VDNKFSKEGRSAYCQILVLPNLNQAQRCAFIASLFN			928	0.00799792	4	VDNKFSKELCDAIVEIHFLPNLNPSQRLAFIFSLFD			928	0.00194769	1	VDNKFNKEWANATCQICNLPNLNESQMPAFILSLSD							0.001	0.0026065		0.001	0.001		0.00499896	0.001		0.001	0.00279459
929	0.00119208	1	VDNKFSKEWDDATFQICGLPNLNHARKLPSSTA*LM			929	0.00333572	4	VDNKFTKEVPNASDQIFLLPNLNDYQVLAFLHSLRD			929	0.00799792	4	VDNKFSKELCDAIVEIHFLPNLNDAQRIAFIFSLFD			929	0.00194769	1	VDNKFNKEWANAIRQICCLPNLNENQEDAFVPSLSD							0.00576832	0.00421301		0.001	0.00308121		0.001	0.001		0.001	0.001
930	0.00119208	1	VDNKFSKEWDAATSQICDLPNLNQAQMDAFVGSLCN			930	0.00333572	4	VDNKFNKELFNAAFEIVSLPNLNLSQERSFIISLNN			930	0.00799792	4	VDNKFSKELCYAVSEIHYLPNLNRYQKCAFIFSLFD			930	0.00194769	1	VDNKFNKEWANAAYQIARLPNLNEDQGIAFVGSLTD							0.00338416	0.0026065		0.001	0.00308121		0.001	0.001		0.001	0.001
931	0.00119208	1	VDNKFSKEWDSAFVEIDLLPNLNADQQCAFVDSLLD			931	0.00333572	4	VDNKFTKEAPNASDQIFLLPNLNDYQVLAFLHSLRD			931	0.00799792	4	VDNKFSKELYSAVCEIHFLPNLNPSQRLAFIFSLFD			931	0.00194769	1	VDNKFNKEWANAAFQISSLPNLNRPQRPAFLASLGD							0.001	0.00421301		0.001	0.00308121		0.001	0.001		0.001	0.001
932	0.00119208	1	VDNKFSKEWADAYSEICFLPNLNHYQMYAFVFSLPN			932	0.00333572	4	VDNKFTKEVPNTSDQIFLLPNLNDYQVLAFLHSLRD			932	0.00799792	4	VDNKFSKELYSAVCEIHFLPNLNPSQRLAFIFSLFD			932	0.00194769	1	VDNKFNKEWANASSEIIGLPNLNEDQQRAFVFSLDD							0.001	0.0026065		0.001	0.00308121		0.001	0.001		0.001	0.001
933	0.00119208	1	VDNKFSKEWATASVQIAGLPNLNPLQGSAFVRSLRN			933	0.00333572	4	VDNKFTKEVPNASDQIFLLPNLNDYQVLAFLHSLRD			933	0.00799792	4	VDNKFSKELYSAVCEIHFLPNLNRDQKCAFIFSLFD			933	0.00194769	1	VDNKFNKEWANASAQIGFLPNLNENQGPAFVRSLDD							0.001	0.0026065		0.001	0.00308121		0.001	0.001		0.00294768	0.001
934	0.00119208	1	VDNKFSKEWGYAYDEIRGLPNLNVAQRPAFVDSLRN			934	0.00333572	4	VDNKFTKEVPNASDQIFSCRT*TTIRCLPSYTACVT			934	0.0099974	5	VDNKFNKELFNAIYQIFVLPNLNEHQRVAFVISLFD			934	0.00194769	1	VDNKFNKEWANASAQIGFLPNLNENQGPAFVVSLDN							0.00338416	0.001		0.00266786	0.001		0.001	0.001		0.001	0.00279459
935	0.00119208	1	VDNKFSKEWYAAVREIHNLPNLNLYQGGAFVNSLFN			935	0.00333572	4	VDNKFTKEVPNASDQIFLLPNLNEYQVLAFLHSLRD			935	0.0099974	5	VDNKFTKEVDSAVFEIHILPNLNESQVVAFVVSLFD			935	0.00194769	1	VDNKFNKEWANASVQICTLPNLNGHQEVAFLNSLID							0.00338416	0.001		0.00266786	0.001		0.001	0.00293446		0.001	0.00279459
936	0.00119208	1	VDNKFSKEWYYAVHEIRALPNLNGSQECAFVGSLDD			936	0.00333572	4	VDNKFTKEVPNASDQIFLLPNLNDYQVRAFIISLNN			936	0.0099974	5	VDNKFYKELAYAIHEIFCLPNLNRDQKCAFIFSLFD			936	0.00194769	1	VDNKFNKEWATAADEIARLPNLNLRQGVAFIGSLRD							0.00219208	0.001		0.001	0.001		0.001	0.00293446		0.001	0.001
937	0.00119208	1	VDNKFSKEWSDATSQICNLPNLNVSQKGAFVDSLPD			937	0.00333572	4	VDNKFTKEVPNASDQIFLLPNLNDYQVLAFLHSLRD			937	0.0099974	5	VDNKFYKELPDAIFEIFSLPNLNANQVIAFVCSLFD			937	0.00194769	1	VDNKFNKEWATAAAQISCLPNLNGTQGSAFLSSLPN							0.0105366	0.00742601		0.001	0.00516242		0.001	0.00873784		0.001	0.001
938	0.00119208	1	VDNKFSKEWSYAVSQIITLPNLNVYQMLAFLSSLRD			938	0.00333572	4	VDNKFTKEVPNASDQIFLLPNLNDYQVLDFLHSLRD			938	0.0099974	5	VDNKFYKELSAATAEIFDLPNLNHDQVVAFVVSLFD			938	0.00194769	1	VDNKFNKEWATAVRQITSLPNLNQVQGSAFVSSLAN							0.001	0.0026065		0.001	0.001		0.001	0.001		0.001	0.00279459
939	0.00119208	1	VDNKFSKEWCAAVRQICSLPNLNGVQEAAFLASLDN			939	0.00333572	4	VDNKFTKEVPNASDQIFLLPNLNDYQVLAFLHSLRD			939	0.0099974	5	VDNKFSKEVVDATIEIHYLPNSNRDQKCAFIFSLFD			939	0.00194769	1	VDNKFNKEWATAVTQIISLPNLNEAQEPAFIFSLVD							0.001	0.0026065		0.0143429	0.0197309		0.00299948	0.001		0.001	0.001
940	0.00119208	1	VDNKFSKEWCSASFEICLLPNLNGDQVNAFVCSLGD			940	0.00333572	4	VDNKFTKEVPNASDQIFLLPNLNDYQVLAFLHSLRG			940	0.0099974	5	VDNKFSKEVVDATIEIHYLPNLNRDQKCAFIFSLFD			940	0.00194769	1	VDNKFNKEWATATAQITNLPNLNPGQERAFLPSLGD							0.001	0.00421301		0.0443644	0.0696799		0.00299948	0.001		0.001	0.001
941	0.00119208	1	VDNKFSKEWFDASIEILLLPNLNALQGGAFVVSLLD			941	0.00333572	4	VDNKFTKEVPNASDQIFLLPNLNDYRVLAFLHSLRD			941	0.0099974	5	VDNKFSKEVVDATIEIHYLPNLNRDQKCAFIFSLSD			941	0.00194769	1	VDNKFNKEWATATAQITNLPNLNDVQERAFVNSLHD							0.001	0.0026065		0.00266786	0.001		0.00699844	0.0106723		0.001	0.001
942	0.00119208	1	VDNKFSKEWFYASSEICRLPNLNVSQGNAFVSSLGD			942	0.00333572	4	VDNKFTKEVPNASDQIFLLPNLNDCQVLAFLHSLRD			942	0.0099974	5	VDNKFSKEVVDATIEIHYLPNLNENQIVAFIISLFD			942	0.00194769	1	VDNKFNKEWATATAQITNLPNLNATQGVAFVGSLCD							0.00219208	0.001		0.639791	0.565008		0.001	0.00293446		0.001	0.001
943	0.00119208	1	VDNKFSKELNDAFFEINGLPNLNQVQGSAFISSLGD			943	0.00333572	4	VDNKFTKEVPNASDQIFLLPNLNDYQVLAFLHSLRD			943	0.0099974	5	VDNKFSKEVVDATIEIHYLPNLNESQVSAFVVSLFD			943	0.00194769	1	VDNKFNKEWATAVLEIIGLPNLNPHQKSAFVGSLSN							0.001	0.0026065		0.001	0.001		0.00499896	0.001		0.001	0.001
944	0.00119208	1	VDNKFSKELNAANGQIIDLPNLNVSQVGAFIRSLDN			944	0.00333572	4	VDNKFTKEVPNASDQIFLLPNLNDYQVLAFLHSLRD			944	0.0099974	5	VDNKFSKEVVDATIEIHYLPNLNEPQVCAFVSSLFD			944	0.00194769	1	VDNKFNKEWATASAQILALPNLNGSQRSAFVSSLDD							0.001	0.0026065		0.001	0.001		0.001	0.00293446		0.001	0.001
945	0.00119208	1	VDNKFSKELSDAYNQIHDLPNLNVYQIVAFIRSLDN			945	0.00333572	4	VDNKFTKEVPNASDRIFLLPNLNDYQVLAFLHSLRD			945	0.0099974	5	VDNKFSKEVVDATIQIHYLPNLNRDQKCAFIFSLFD			945	0.00194769	1	VDNKFNKEWATASAQIVVLPNLNQPQLSAFLFSLVD							0.001	0.0026065		0.001	0.001		0.001	0.001		0.001	0.001
946	0.00119208	1	VDNKFSKELSSAFFEIIILPNLNLSQGHAFIDSLFN			946	0.00333572	4	VDNKFTKEVSNASDQIFLLPNLNDYQVLAFLHSLRD			946	0.0099974	5	VDNKFSKEVVDAIFEIFVLPNLNESQVSAFVVSLFD			946	0.00194769	1	VDNKFNKEWATASAQIVVLPNLNRLQEHAFLCSLSD							0.00219208	0.001		0.00266786	0.001		0.001	0.001		0.001	0.001
947	0.00119208	1	VDNKFSKELIAAFCEISRLPNLNRCQEFAFLVSLHN			947	0.00333572	4	VDNKFTKEGNDAADEIFILPNLNVTQVYAFLTSLRN			947	0.0099974	5	VDNKFSKEVVDSTIEIHYLPNLNRDQKCAFIFSLFD			947	0.00194769	1	VDNKFNKEWATASAQIVVLPNLNLTQGRAFINSLRD							0.00219208	0.0026065		0.001	0.001		0.001	0.001		0.001	0.001
948	0.00119208	1	VDNKFSKELISADRQIHVLPNLNVVQGGAFIHSLLN			948	0.00333572	4	VDNKFTKEVPNASDQIFLLPNLNDYQVLAFLHSLRD			948	0.0099974	5	VDNKFSKEVCDAIHEIHFLPNLNVDQRHAFIFSLFD			948	0.00194769	1	VDNKFNKEWATASAQIVVLPNLNLTQGRAFLGSLFN							0.001	0.00421301		0.001	0.001		0.001	0.001		0.001	0.001
949	0.00119208	1	VDNKFSKELHNATHQITGLPNLNDCQQVAFLCSLTD			949	0.00333572	4	VDNKFYKELCSAADEIFVLPNLNDDQVLAFINSLLN			949	0.0099974	5	VDNKFSKEVCDAIHEIHFLPNLNEAQRIAFIFSLFD			949	0.00194769	1	VDNKFNKEWATASAQIVVLPNLNLTQGRAFVGSLDN							0.00219208	0.001		0.00266786	0.00308121		0.001	0.001		0.00294768	0.001
950	0.00119208	1	VDNKFSKELRDATYEIDRLPNLNVNQRIAFVVSLYN			950	0.00333572	4	VDNKFYKELCSAADEIFVLPNLNDDQVLAFLHSLRN			950	0.0099974	5	VDNKFSKEVCDAIHEIHFLPNLNDAQRIAFIFSLFD			950	0.00194769	1	VDNKFNKEWATASAQIVVLPNLNLTQGRAFVSSLSD							0.00219208	0.001		0.001	0.001		0.00299948	0.00680338		0.001	0.001
951	0.00119208	1	VDNKFSKELRYADSEIDYLPNLNLGQEFAFISSLSD			951	0.00333572	4	VDNKFYKELCSAADEIFVLPNLNDYQVLAFINSLRN			951	0.0099974	5	VDNKFSKEVCDAIHEIHFLPNLNDAQRIAFIFSLFD			951	0.00194769	1	VDNKFNKEWATASAQIVVLPNLNLTQGRAFVSSLGN							0.0474911	0.0491951		0.001	0.001		0.001	0.001		0.001	0.00279459
952	0.00119208	1	VDNKFSKELRYADGQIRCLPNLNDYQKLAFLSSLIN			952	0.00333572	4	VDNKFYKELCSAADEIFVLPNLNDYQVLAFLHSLRN			952	0.0099974	5	VDNKFSKEVCDAIHEIHFLPNLNDYQRVAFIFSLFD			952	0.00194769	1	VDNKFNKEWATASAQIVVLPNLNLTQGRAFVSSLYD							0.001	0.0026065		0.00266786	0.001		0.001	0.00293446		0.001	0.001
953	0.00119208	1	VDNKFSKELDAAVVEISVLPNLNLDQRVAFVISLND			953	0.00333572	4	VDNKFSKEVCDAIHEIHFLPNLNDAQRIAFIFSLFD			953	0.0099974	5	VDNKFSKEVCDAIHEIHFLPNLNESQVSAFVVSLFD			953	0.00194769	1	VDNKFNKEWATASAQIVVLPNLNGAQLDAFLGSLSN							0.00219208	0.001		0.001	0.00308121		0.00299948	0.001		0.001	0.00458918
954	0.00119208	1	VDNKFSKELAYAIREISLLPNLNLSQKGAFLCSLGD			954	0.00416965	5	VDNKFNKELFNAAFEIVSLPNLNISQERAFIISLNN			954	0.0099974	5	VDNKFSKELCYAVSEIHYLPNLNRYQKCAFIFSLFN			954	0.00194769	1	VDNKFNKEWATASAQIVVLPNLNGCQMCAFVGSLPN							0.001	0.0026065		0.001	0.001		0.001	0.00293446		0.00294768	0.001
955	0.00119208	1	VDNKFSKELGNAYVEIFSLPNLNVAQVSAFISSLRD			955	0.00416965	5	VDNKFTKEVPNASDQIFLLPNLNDYQVLAFLHSLRD			955	0.0099974	5	VDNKFSKELVNAVVQIHHLPNLNVIQVCAFIFSLFD			955	0.00194769	1	VDNKFNKEWATASREICVLPNLNQHQGGAFVGSLPD							0.00219208	0.001		0.00266786	0.001		0.001	0.001		0.001	0.00458918
956	0.00119208	1	VDNKFSKELGDANNQIACLPNLNPPQGPAFVSSLID			956	0.00416965	5	VDNKFTKEVPNASDQIFLLPNLNDYQVPAFLHSLRD			956	0.0099974	5	VDNKFSKELYNAIFEIFTLPNLNDSQKVAFVGSLFD			956	0.00194769	1	VDNKFNKEWATASREITNLPNLNVSQEGAFVFSLDD							0.001	0.0026065		0.00266786	0.001		0.001	0.001		0.001	0.00279459
957	0.00119208	1	VDNKFSKELGDANNQIACLPNLNLSQRTAFVVSLVD			957	0.00416965	5	VDNKFTKEVPNASDQIFLLPNLNDYQVLALLHSLRD			957	0.0119969	6	VDNKFNKELVDATIEITDLPNLNDVQVFAFIYSLFD			957	0.00194769	1	VDNKFNKEWATASDQIACLPNLNHFQGGAFLRSLYN							0.00219208	0.0026065		0.001	0.001		0.00499896	0.001		0.001	0.00638377
958	0.00119208	1	VDNKFSKELVAAIVEIVCLPNLNANQGSAFIVSLWD			958	0.00416965	5	VDNKFTKEVPNASDQIFLLPNLNDYQVLALLHSLRD			958	0.0119969	6	VDNKFTKEVDSAVFEIHILPNLNPSQRLAFIFSLFD			958	0.00194769	1	VDNKFNKEWADATNQICALPNLNVIQERAFVGSLDD							0.001	0.0026065		0.001	0.001		0.001	0.001		0.00879074	0.001
959	0.00119208	1	VDNKFSKELSSASVEICHLPNLNPPQGPAFVSSLID			959	0.00416965	5	VDNKFTKEVPNASDQIFLLPNLNDYQVLAFLNSLRD			959	0.0119969	6	VDNKFYKELHSAIYQIFSLPNLNPGQVCAFVVSLFN			959	0.00194769	1	VDNKFNKEWADAIPQILSLPNLNADQGSAFIGSLVN							0.00338416	0.001		0.001	0.001		0.001	0.00293446		0.00294768	0.001
960	0.00119208	1	VDNKFSKELCNANLEIDFLPNLNLSQQSAFVVSLRN			960	0.00416965	5	VDNKFTKEVPNASDQIFLLPNLNDYQVLAFLHSMRD			960	0.0119969	6	VDNKFSKEVVDATIEIHYLPNLNPSQRLAFIFSLFD			960	0.00194769	1	VDNKFNKEWADAIPQICRLPNLNLGQQNAFVTSLHD							0.00219208	0.001		0.001	0.001		0.0109974	0.0319514		0.001	0.001
961	0.00119208	1	VDNKFSKELFAANIQITDLPNLNPIQLNAFICSLTD			961	0.00416965	5	VDNKFTKEVPNASDQIFLLPNLNDYQVLAFLHSPRD			961	0.0119969	6	VDNKFSKEVVDATIEIHYLPNLNREQGGAFIVSLWD			961	0.00194769	1	VDNKFNKEWADAVSEICHLPNLNEPQRPARQPE*							0.00219208	0.001		0.001	0.001		0.00499896	0.001		0.001	0.001
962	0.00119208	1	VDNKFSKELFDADTQIPFLPNLNGFQMFAFLVSLLN			962	0.00416965	5	VDNKFTKEVPNASDQIFLLPNLNDYQVLAFLHSLHD			962	0.0119969	6	VDNKFSKEVVDATIEIHYLPNLNRDQKCASIFSLFD			962	0.00194769	1	VDNKFNKEWADAVAEIILLPNLNRFQGSAFVNSLGD							0.001	0.0026065		0.0260179	0.00516242		0.001	0.001		0.001	0.001
963	0.00119208	1	VDNKFSKEGNTAISEIASLPNLNGFQGYAFLNSLID			963	0.00416965	5	VDNKFTKEVPNASDQIFLLPNLNDYQVLAFLHSLRD			963	0.0119969	6	VDNKFSKEVVDATIEIHYLPNLNRDQKCAFIFSLFD			963	0.00194769	1	VDNKFNKEWADASAEIISLPNLNLRQENAFVRSLRD							0.001	0.0026065		0.00266786	0.001		0.001	0.001		0.001	0.001
964	0.00119208	1	VDNKFSKEGIDADREIRSLPNLNLSQISAFVGSLGD			964	0.00416965	5	VDNKFTKEVPNASDQIFLLPNLNDYQLLAFLHSLRD			964	0.0119969	6	VDNKFSKEVVDATIEIHYLPNLNRDQKCAFIFSLFD			964	0.00194769	1	VDNKFNKEWADASSQICGLPNLNQRQGGAFLASLAN							0.00338416	0.001		0.001	0.001		0.001	0.001		0.001	0.001
965	0.00119208	1	VDNKFSKEGISANGEINNLPNLNACQEIAFLGSLTN			965	0.00416965	5	VDNKFTKEVPNASDQIFLLPNLNEVQERAFVNSLFD			965	0.0119969	6	VDNKFSKEVVDATIEIHYLPNLNRDQKCAFIFSLFD			965	0.00194769	1	VDNKFNKEWADASCEILCLPNLNGPQEVAFIHSLCN							0.001	0.0026065		0.00266786	0.001		0.0589849	0.0164757		0.001	0.001
966	0.00119208	1	VDNKFSKEGPAAFIEIYDLPNLNREQGGAFIVSLWD			966	0.00416965	5	VDNKFTKEVPNASDQIFLLPNLNDYQVLAFLHSLRD			966	0.0119969	6	VDNKFSKEVVDATIEIHYLPNLNDAQRIAFIFSLFD			966	0.00194769	1	VDNKFNKEWADATAQITCLPNLNGVQEPAFVLSLHN							0.00219208	0.0026065		0.001	0.001		0.00299948	0.001		0.00294768	0.00458918
967	0.00119208	1	VDNKFSKEGPAAVIEIDRLPNLNRYQKTAFVVSLFD			967	0.00416965	5	VDNKFTKELCSAADEIFVLPNLNDDQVLAFINSLRN			967	0.0119969	6	VDNKFSKEVVDATIDIHYLPNLNRDQKCAFIFSLFD			967	0.00194769	1	VDNKFNKEWADAIRQIAALPNLNVGQEPAFVSSLVN							0.0176891	0.00903252		0.001	0.001		0.001	0.001		0.001	0.001
968	0.00119208	1	VDNKFSKEGRYAIIEIYYLPNLNLAQGYAFLHSLSN			968	0.00416965	5	VDNKFAKEVPNASDQIFLLPNLNDYQVLAFLHSLRD			968	0.0119969	6	VDNKFSKEVVDAIHEIHFLPNLNRDQKCAFIFSLFD			968	0.00194769	1	VDNKFNKEWADAICQILTLPNLNRRQMNAFVPSLHD							0.001	0.0026065		0.001	0.001		0.00299948	0.001		0.001	0.001
969	0.00119208	1	VDNKFSKEGRDAYHQIIYLPNLNGSQRSAFIISLWD			969	0.00500359	6	VDNKFNKELPNASDQIFLLPNLNDYQVLAFLHSLRD			969	0.0119969	6	VDNKFSKEVVYATIEIHYLPNLNRDQKCAFIFSLFD			969	0.00194769	1	VDNKFNKEWADAIVEICGLPNLNEGQRGAFIFSLFD							0.00219208	0.001		0.001	0.00308121		0.00299948	0.001		0.001	0.001
970	0.00119208	1	VDNKFSKEGRAADCEICCLPNLNGGQRIAFVGSLYN			970	0.00500359	6	VDNKFNKELCSAADEIFVLPNLNDYQVLAFLHSLRD			970	0.0119969	6	VDNKFSKELGTAIHEIFALPNLNEVQVVAFVCSLFD			970	0.00194769	1	VDNKFNKEWADAASEILSLPNLNGCQGGAFLGSLIN							0.001	0.0026065		0.001	0.001		0.001	0.00293446		0.001	0.001
971	0.00119208	1	VDNKFSKEGDAAYFEIGVLPNLNVSQEAAFLFSLAN			971	0.00500359	6	VDNKFTKEVPNASDQIFLLPNLNDYQVLAFLHSLRD			971	0.0119969	6	VDNKFSKELCDAIHEIHFLPNLNDAQRIAFIFSLFD			971	0.00194769	1	VDNKFNKEWADAVCQICALPNLNACQEIAFVGSLDD							0.00219208	0.001		0.00266786	0.001		0.001	0.001		0.001	0.001
972	0.00119208	1	VDNKFSKEGAAAFLQINHLPNLNECQGVAFLPSLDD			972	0.00500359	6	VDNKFTKEVPNASDQIFLLPNLNDYQVLAFLHSLRD			972	0.0119969	6	VDNKFSKELCDAIVEIHFLPNLNVDQRHAFIFSLFD			972	0.00194769	1	VDNKFNKEWADAVCEILILPNLNAIQGSAFISSLDN							0.00219208	0.001		0.0994039	0.127954		0.001	0.00293446		0.001	0.001
973	0.00119208	1	VDNKFSKEGGNAYSEISDLPNLNDHQRVAFVFSLCD			973	0.00500359	6	VDNKFTKEVPNASDQIFLLPNLNNYQVLAFLHSLRD			973	0.0119969	6	VDNKFSREVVDATIEIHYLPNLNRDQKCAFIFSLFD			973	0.00194769	1	VDNKFNKEWADAVSQIIGLPNSNLNQKLTFVSSLNN							0.001	0.0026065		0.001	0.00308121		0.001	0.001		0.001	0.00279459
974	0.00119208	1	VDNKFSKEGGDAASQICNLPNLNVCQMCAFLNSLDN			974	0.00500359	6	VDNKFTKEVPNASDQIFLLPNLNLSQERAFLHSLRD			974	0.0119969	6	VDNKFSKEVVDATIEIHYLPNLNRDQKCAFIFSLFD			974	0.00194769	1	VDNKFNKEWADAVREITGLPNLNQYQEGAFVHSLDD							0.00219208	0.0026065		0.0243501	0.0280557		0.001	0.001		0.001	0.001
975	0.00119208	1	VDNKFSKEGGSAIGEISLLPNLNVGQVSAFINSLTD			975	0.00500359	6	VDNKFTKEVPNASDQIFLLPNLNDYKVLAFLHSLRD			975	0.0139964	7	VDNKFTKEVDSAVFEIHYLPNLNRDQKCAFIFSLFD			975	0.00194769	1	VDNKFNKEWADAVREITGLPNLNEGQGGAFVGSLPN							0.00219208	0.001		0.001	0.001		0.00299948	0.001		0.001	0.001
976	0.00119208	1	VDNKFSKEGGYATGQIYILPNLNVSQRDAFLCSLFN			976	0.00500359	6	VDNKFTKEVPNASDQIFLLPNLNDYQVLAFLQSLRD			976	0.0139964	7	VDNKFYKELPDAIFEIFSLPNLNDAQRIAFIFSLFD			976	0.00194769	1	VDNKFNKEWADAVREITGLPNLNGGQGFAFVSSLGD							0.001	0.00421301		0.001	0.00308121		0.001	0.001		0.00294768	0.001
977	0.00119208	1	VDNKFSKEGVTATIEIFYLPNLNARQKPAFLVSLCD			977	0.00500359	6	VDNKFTKEVPNASDQIFLLPNLNDYQVLAFLHSLRD			977	0.0139964	7	VDNKFSKEVDSAVFEIHILPNLNDAQRIAFIFSLFD			977	0.00194769	1	VDNKFNKEWADAVDQICYLPNLNRAQGDAFIDSLAN							0.00219208	0.001		0.001	0.001		0.001	0.001		0.001	0.00279459
978	0.00119208	1	VDNKFSKEGVTAAIEIFYLPNLNARQKPAFLVSLCD			978	0.00500359	6	VDNKFTKEVPNASDQIFLLPNLNDYQVLAFLHSLRD			978	0.0139964	7	VDNKFSKEVVDATIEIHYLPNLKRDQKCAFIFSLFD			978	0.00194769	1	VDNKFNKEWADASNQIVALPNLKAHQQLAFVYSLDN							0.00219208	0.001		0.001	0.001		0.001	0.001		0.00294768	0.001
979	0.00119208	1	VDNKFSKEGVTAAIEIFYLPNLNPPQGPAFVSSLID			979	0.00500359	6	VDNKFTKEVPNASD*IFLLPNLNDYQVLAFLHSLRD			979	0.0139964	7	VDNKFSKEVVDATIEIHYLPNLNRDQKCAFIFSLCD			979	0.00194769	1	VDNKFNKEWADASSQILRLPNLNVCQGDAFISSLGD							0.00338416	0.001		0.00767145	0.00308121		0.001	0.001		0.001	0.00279459
980	0.00119208	1	VDNKFSKEGVTAAIEIFYLPNLNRPQESAFVNSLTN			980	0.00583752	7	VDNKFNKELHYAVHEIISLPNLNDYQVLAFLHSLRD			980	0.0139964	7	VDNKFSKEVVDATIEIHYLPNLNRDQKCSFIFSLFD			980	0.00194769	1	VDNKFNKEWADASDQIVCLPNLNLSQRFAFIGSLGD							0.00815248	0.00903252		0.001	0.001		0.001	0.001		0.00489537	0.00279459
981	0.00119208	1	VDNKFSKEGVTAAIEIFYLPNLNARQKPAFLVSLCD			981	0.00583752	7	VDNKFTKEVPNASDQIFLLPNLNDYQVLAFLHSLRD			981	0.0139964	7	VDNKFSKEVVDATIEIHYLPNLNRDQKFAFIFSLFD			981	0.00194769	1	VDNKFNKEWAAATNQIVVLPNLNAFQERAFVRSLGD							0.001	0.0026065		0.001	0.001		0.001	0.001		0.001	0.001
982	0.00119208	1	VDNKFSKEGVTAAIEIFYLPNLNARQKPAFLVSLFN			982	0.00583752	7	VDNKFTKEVPKASDQIFLLPNLNDYQVLAFLHSLRD			982	0.0139964	7	VDNKFSKEVVDATIEIHYLPNLNRDQRVAFIFSLFD			982	0.00194769	1	VDNKFNKEWAAAAYQILRLPNLNGYQLGAFLGSLPN							0.00219208	0.00581951		0.00266786	0.001		0.001	0.001		0.00684306	0.00458918
983	0.00119208	1	VDNKFSKEGVTAAIEIFYLPNLNARQKPAFVHSLCN			983	0.00583752	7	VDNKFTKEVPNASNQIFLLPNLNDYQVLAFLHSLRD			983	0.0139964	7	VDNKFSKEVVDATIEIHYLPNLNESQVVAFVVSLFD			983	0.00194769	1	VDNKFNKEWAAAAFQILSLPNLNGGQEDAFVFSLAN							0.00219208	0.001		0.001	0.001		0.001	0.001		0.001	0.00279459
984	0.00119208	1	VDNKFSKEGVTAAIEIFYLPNLNARQEPAFLVSLCD			984	0.00583752	7	VDNKFTKEVPNASDQIFLLPNLNDYQVLAFLHSLRD			984	0.0139964	7	VDNKFSKEVVDATIEIHYLPNLNEGQVVAFVVSLFD			984	0.00194769	1	VDNKFNKEWAAASNQILILPNLNGSQRVAFLGSLSD							0.001	0.0026065		0.00433572	0.00308121		0.0249938	0.0242135		0.001	0.001
985	0.00119208	1	VDNKFSKEGVTAAIEIFYLPNLNAFQEFAFIFSLTN			985	0.00583752	7	VDNKFTKEVPNASDQIFLLPNLNDYQVLAFLHSLRD			985	0.0139964	7	VDNKFSKEVVDATVEIHYLPNLNRDQKCAFIFSLFD			985	0.00194769	1	VDNKFNKEWAAASRQIRRLPNLNGDQVGAFVDSLDD							0.00219208	0.001		0.001	0.00308121		0.001	0.001		0.00294768	0.001
986	0.00119208	1	VDNKFSKEGVTAAIEIFYLPNLNGAQMSAFIVSLHN			986	0.00667145	8	VDNKFTKEVHNASDQIFLLPNLNDYQVLAFLHSLRD			986	0.0139964	7	VDNKFSKEVCDAIHEIHFLPNLNPSQRLAFIFSLFD			986	0.00194769	1	VDNKFNKEWAAASREISILPNLNDIQEGAFIYSLGD							0.001	0.0026065		0.001	0.001		0.001	0.001		0.00294768	0.001
987	0.00119208	1	VDNKFSKEGVTAAIEIFYLPNLNVLQQGAFVNSLLN			987	0.00667145	8	VDNKFTKEVPNASDQIFLLPNLNDYQVLAFLHSLRD			987	0.0139964	7	VDNKFSKEVCDAIHEIHFLPNLNDAQRISFIFSLFD			987	0.00194769	1	VDNKFNKEWAAASIQICSLPNLNVCQKVAFLGSLDN							0.00219208	0.001		0.001	0.001		0.001	0.001		0.00294768	0.001
988	0.00119208	1	VDNKFSKEGVTAAIEIFYLPNLNVYQIVAFIRSLDN			988	0.00667145	8	VDNKFTKEVPNASDQIFLLPNLNLSQERAFIISLRD			988	0.0139964	7	VDNKFSKEVCDAIHEIHFLPNLNDAQRIAFIFSLFD			988	0.00194769	1	VDNKFNKEWAAATFEILTLPNLNPSQVHAFVPSLYN							0.00219208	0.001		0.00266786	0.001		0.001	0.001		0.001	0.00279459
989	0.00119208	1	VDNKFSKEGVAAFRQIYVLPNLNPCQGSAFITSLRD			989	0.00667145	8	VDNKFTKEVPNASDQIFLLPNLNDYQVLAFLHSLRY			989	0.0139964	7	VDNKFSKEVFDAIHEIHFLPNLNDAQRIAFIFSLFD			989	0.00194769	1	VDNKFNKEWAAATHQICVLPNLNVHQLSAFVGSLRD							0.00219208	0.001		0.00266786	0.001		0.001	0.00486892		0.001	0.001
990	0.00119208	1	VDNKFSKEGCNASLQIAGLPNLNDGQKDAFVSSLSD			990	0.00667145	8	VDNKFTKEVPNASDQIFLLPNLNDYQVLAFLHSLCD			990	0.0139964	7	VDNKFSKELCDAIVEIHFLPNLNVDQRHAFIFSLFD			990	0.00194769	1	VDNKFNKEWAAAIIQILALPNLNVAQEGAFLVSLSN							0.001	0.00421301		0.001	0.00308121		0.001	0.001		0.001	0.001
991	0.00119208	1	VDNKFSKEGCDAFVQILLLPNLNQSQIDAFIFSLPD			991	0.00667145	8	VDNKFYKELCSAADEIFVLPNLNDDQVLAFIISLNN			991	0.0139964	7	VDNKFSKELHDAVHQIFNLPNLNEPQVCAFIFSLFD			991	0.00194769	1	VDNKFNKEWAAAAVQILTLPNLNRGSGGRLRLQPAR							0.00219208	0.001		0.00600359	0.00308121		0.001	0.001		0.00294768	0.001
992	0.00119208	1	VDNKFSKEGFSASCEIVSLPNLNARQKPAFLVSLCD			992	0.00750538	9	VDNKFTKEVPNASDKIFLLPNLNDYQVLAFLHSLRD			992	0.0139964	7	VDNKFSKELHDAVHQIFNLPNLNEPQVCAFVSSLFD			992	0.00194769	1	VDNKFNKEWAAAAVQILTLPNLNGYQGVAFLHSLVN							0.001	0.00421301		0.001	0.001		0.001	0.001		0.00294768	0.001
993	0.00119208	1	VDNKFSKEVSDAAGEIPNLPNLNANQKSAFVFSLGD			993	0.00750538	9	VDNKFTKEVPNASDQIFLLPNLNDYQVLAFIISLNN			993	0.0159958	8	VDNKFSKEGCSAIVQIHYLPNLNVVQKVAFIFSLFD			993	0.00194769	1	VDNKFNKEWAAAVDQIRFLPNLNGSQGYAFVSSLDD							0.001	0.0026065		0.001	0.001		0.00299948	0.001		0.001	0.00458918
994	0.00119208	1	VDNKFSKEVISASFQICGLPNLNEYQMGAFIFSLIN			994	0.00750538	9	VDNKFTKEVPNASDQIFLLPNLNDYQVLSFLHSLRD			994	0.0159958	8	VDNKFSKEVVDATIEIQYLPNLNRDQKCAFIFSLFD			994	0.00194769	1	VDNKFNKEWAAAVAQIISLPNLNLDQGHAFVSSLCN							0.001	0.0026065		0.001	0.001		0.001	0.00293446		0.00294768	0.001
995	0.00119208	1	VDNKFSKEVHAAFGQINLLPNLNDSQVGAFVRSLLD			995	0.00750538	9	VDNKFTREVPNASDQIFLLPNLNDYQVLAFLHSLRD			995	0.0159958	8	VDNKFSKEVVDATIEIHYMPNLNRDQKCAFIFSLFD			995	0.00194769	1	VDNKFNKEWAAAVVEIAALPNLNADQEDAFVFSLGD							0.00219208	0.001		0.001	0.001		0.001	0.00293446		0.001	0.001
996	0.00119208	1	VDNKFSKEVLNAYAQIGNLPNLNVYQIVAFIRSLDN			996	0.00750538	9	VDNKFYKELCSAADEIVSLPNLNLSQERAFIISLNN			996	0.0159958	8	VDNKFSKEVVDATIEIHYLPNLNHDQKCAFIFSLFD			996	0.00194769	1	VDNKFNKEWAAAVIQILCLPNLNRGQVCAFVGSLGD							0.00457624	0.00581951		0.00266786	0.001		0.001	0.001		0.00294768	0.001
997	0.00119208	1	VDNKFSKEVLNAYSEIFLMPNLNVDQILAFVLSLDN			997	0.00833931	10	VDNKFNKELFNAAFEIVSLPNLNLSQERAFINSLRN			997	0.0159958	8	VDNKFSKEVVDATIEIHYLPNLNRDQKCAFIFSLFD			997	0.00194769	1	VDNKFNKEWAAAVIQICALPNLNRIQMGAFVPSLSD							0.0069604	0.0026065		0.001	0.001		0.001	0.001		0.001	0.00279459
998	0.00119208	1	VDNKFSKEVLNAYSEIFLPPNLNVYQIVAFIRSLDN			998	0.00833931	10	VDNKFTKEVPNASDQIFLMPNLNDYQVLAFLHSLRD			998	0.0159958	8	VDNKFSKEVVDATIEIHYLPNLNRDQKCAFIFSLFD			998	0.00194769	1	VDNKFNKEWAAAVHEIVTLPNLNDVQEGAFLSSLVD							0.00219208	0.001		0.00266786	0.001		0.00299948	0.001		0.001	0.00279459
999	0.00119208	1	VDNKFSKEVLNAYSEIFLLPNLNPVQGSAFVNSLRD			999	0.00833931	10	VDNKFTEEVPNASDQIFLLPNLNDYQVLAFLHSLRD			999	0.0159958	8	VDNKFSKEVVDATIEIHYLPNLNESQIIAFVNSLFD			999	0.00194769	1	VDNKFNKEWAAAVGQILGLPNLNASQEYAFISSLSN							0.00338416	0.0026065		0.00933931	0.0155685		0.001	0.001		0.001	0.00279459
1000	0.00119208	1	VDNKFSKEVLNAYSEIFLLPNLNREQGGAFIVSLWD			1000	0.00917324	11	VDNKFNKELCSAADEIFVLPNLNDDQVLAFINSLRN			1000	0.0159958	8	VDNKFSKEVVDATIEIHILPNLNDYQRVAFIFSLFD			1000	0.00194769	1	VDNKFNKEWAAAVSEILKPAPAARLRRQPG*							0.00338416	0.001		0.001	0.00308121		0.001	0.001		0.001	0.001
1001	0.00119208	1	VDNKFSKEVLNAYSEIFLLPNLNRHQMIAFIDSLVD			1001	0.0100072	12	VDNKFTKEVPNASDQIFLLPNLNDYQVLAFIHSLRD			1001	0.0159958	8	VDNKFSKELCDAIVEIHFLPNLNVDQKCAFIFSLFD			1001	0.00194769	1	VDNKFNKEWAAAVSEIISLPNLNVSQESAFIVSLGN							0.001	0.0026065		0.001	0.001		0.001	0.00293446		0.001	0.00279459
1002	0.00119208	1	VDNKFSKEVLNAYSEIFLLPNLNARQKPAFLVSLCD			1002	0.0100072	12	VDNKFTKEVPNSSDQIFLLPNLNDYQVLAFLHSLRD			1002	0.0179953	9	VDNKFYKEVGTAVAEIHFLPNLNQVQRVAFIFSLFD			1002	0.00194769	1	VDNKFNKEWAAASHQIHLLPNLNDDQEIAFVGSLDD							0.00338416	0.001		0.001	0.001		0.00299948	0.00293446		0.001	0.001
1003	0.00119208	1	VDNKFSKEVLNAYSEIFLLPNLNAFQEFAFIFSLTN			1003	0.011675	14	VDNKFTKEVPNASDQIFLLPNLNDYQVLAFLHSLRD			1003	0.0179953	9	VDNKFYKEVCDAIHEIHFLPNLNDAQRIAFIFSLFD			1003	0.00194769	1	VDNKFNKEWAAASRQITGLPNLNHVQGAAFLCSLSD							0.001	0.0026065		0.00266786	0.001		0.001	0.001		0.001	0.001
1004	0.00119208	1	VDNKFSKEVLNAYSEIFLLPNLNVYQRRAFVFSLTN			1004	0.011675	14	VDNKFTKEVPNASDQIFLLPNLNDYQVLAFLHSLSD			1004	0.0179953	9	VDNKFSKEVVDATIEIHYLPNLNRDHKCAFIFSLFD			1004	0.00194769	1	VDNKFNKEWAAASDQILHLPNLNGFQEVAFVSSLNN							0.00219208	0.001		0.0527037	0.0447054		0.0389901	0.295038		0.001	0.00279459
1005	0.00119208	1	VDNKFSKEVLNAYSEIFLLPNLNVYQIVAFISSLDN			1005	0.011675	14	VDNKFTKEVPNASDQIFLLPNLNDYQVLAFLHSLRE			1005	0.0179953	9	VDNKFSKEVCDAIHEIHFLPNLNDAQRIAFIFSLFD			1005	0.00194769	1	VDNKFNKEWAAASAQIACLPNLNGAQESAFVPSLAN							0.00219208	0.001		0.001	0.001		0.894768	0.173167		0.001	0.001
1006	0.00119208	1	VDNKFSKEVLNAYSEIFLLPNLNVYQIVAFIRSLHN			1006	0.011675	14	VDNKFTKEVPNASDQIFLLPNLNDYQVLAFLHSLRD			1006	0.0199948	10	VDNKFSKEVVDETIEIHYLPNLNRDQKCAFIFSLFD			1006	0.00194769	1	VDNKFNKEWAAASNQILHLPNLNGRQESAFINSLGD							0.001	0.0026065		0.00767145	0.00308121		0.001	0.001		0.001	0.001
1007	0.00119208	1	VDNKFSKEVLNAYSEIFLLPNLNVDKILAFIRSLDN			1007	0.012509	15	VDNKFTKEVPNASDQIFLLQNLNDYQVLAFLHSLRD			1007	0.0199948	10	VDNKFSKEVVDATIEINYLPNLNRDQKCAFIFSLFD			1007	0.00194769	1	VDNKFNKEWAAASCEIVCLPNLNGGQGGAFVRSLVD							0.001	0.0026065		0.001	0.001		0.00299948	0.001		0.001	0.001
1008	0.00119208	1	VDNKFSKEVLNAYSEIFLLPNLNVDQILAFVYSLRN			1008	0.012509	15	VDNKFTKEVPNASDQIFLLPNLNYYQVLAFLHSLRD			1008	0.0199948	10	VDNKFSKEVVDATIEIHYLPNLNDYQRVAFIFSLFD			1008	0.00194769	1	VDNKFNKEWAYATGQILHLPNLNLFQGSAFIYSLTD							0.00338416	0.001		0.00600359	0.00724363		0.001	0.00680338		0.001	0.00279459
1009	0.00119208	1	VDNKFSKEVLNAYSEIFLLPNLNVDQILAFVFSLFN			1009	0.012509	15	VDNKFYKELNDAAYQIATLPNLNEVQERAFVNSLFD			1009	0.0199948	10	VDNKFSKEVCDAIHEIHFLPNLNDAQRIAFIFSLFD			1009	0.00194769	1	VDNKFNKEWAYATCEIVNLPNLNGAQQCAFVDSLSN							0.00219208	0.001		0.001	0.001		0.001	0.001		0.001	0.001
1010	0.00119208	1	VDNKFSKEVLNAYSEIFLLPNLNVDQILAFVLSMDN			1010	0.0133429	16	VDNKFNKELFNAAFEIVSLPNLNDDQVLAFINSLRN			1010	0.0199948	10	VDNKFSKEVCDAIYEIHILPNLNVFQRLAFIFSLFD			1010	0.00194769	1	VDNKFNKEWAYAVDEICHLPNLNAFQESAFIYSLDD							0.00219208	0.001		0.001	0.001		0.001	0.001		0.001	0.00279459
1011	0.00119208	1	VDNKFSKEVLNAYSEIFLLPNLNVDQILAFVLSLAD			1011	0.0133429	16	VDNKFTKEVPNASDQIFLLPNLNEDQELAFVISLNN			1011	0.0199948	10	VDNKFSKELYSAVCEIHFLPNLNDAQRIAFIFSLFD			1011	0.00194769	1	VDNKFNKEWAYAVSQILPLPNLNEDQGCAFVVSLYD							0.00219208	0.001		0.001	0.001		0.00299948	0.001		0.001	0.00279459
1012	0.00119208	1	VDNKFSKEVLNAYSEIFLLPNLNVDQILAFVLSLYD			1012	0.0150108	18	VDNKFNKELFNAAFEIVSLPNLNLSQVLAFLHSLRD			1012	0.0219943	11	VDNKFSKEVVDATIEIHYLPNLNRDQKCAFIFSLFD			1012	0.00194769	1	VDNKFNKEWAYAVREICCLPNLNGNQEFAFAASLRD							0.00219208	0.001		0.00600359	0.00308121		0.001	0.001		0.001	0.001
1013	0.00119208	1	VDNKFSKEVLNAYSEIFLLPNLNVDQILAFVLSLSD			1013	0.0158447	19	VDNKFTKEVPNASDQIFLLPNLNDYQVLAFINSLRD			1013	0.0219943	11	VDNKFSKEVVDATIEIHYLPNLNRDQKCAFIFSLFD			1013	0.00194769	1	VDNKFNKEWAYASNQIIALPNLNGSQIPAFVVSLAD							0.00219208	0.001		0.00266786	0.001		0.00299948	0.001		0.001	0.001
1014	0.00119208	1	VDNKFSKEVLNAYSEIFLLPNLNVDQILAFVDSLRD			1014	0.0158447	19	VDNKFTKEVPNASDQIFLLPNLNDYHVLAFLHSLRD			1014	0.0219943	11	VDNKFSKEVFDATIEIHYLPNLNRDQKCAFIFSLFD			1014	0.00194769	1	VDNKFNKEWAYASSEICCLPNLNACQGGAFVGSLFD							0.001	0.0026065		0.001	0.00308121		0.001	0.00293446		0.001	0.001
1015	0.00119208	1	VDNKFSKEVLNAYSEIFLLPNLNVDQIVAFIRSLNN			1015	0.0166786	20	VDNKFTKEVPNASDQIFLLPNLNDYQVLAFINSLRD			1015	0.0239938	12	VDNKFNKEVCDAIHEIHFLPNLNDAQRIAFIFSLFD			1015	0.00194769	1	VDNKFNKEWAYASSEICCLPNLNVSQERAFVVSLCD							0.001	0.00903252		0.001	0.001		0.001	0.00486892		0.00684306	0.001
1016	0.00119208	1	VDNKFSKEVLNAYSDIFLLPNLNVDQILAFVLSLDN			1016	0.0166786	20	VDNKFTKEVPNASYQIFLLPNLNDYQVLAFLHSLRD			1016	0.0239938	12	VDNKFTKEVVDATIEIHYLPNLNRDQKCAFIFSLFD			1016	0.00194769	1	VDNKFNKEWAYASSEICCLPNLNVCQRPAFVGSLCN							0.001	0.0026065		0.00266786	0.001		0.001	0.001		0.00294768	0.001
1017	0.00119208	1	VDNKFSKEVDNAISQIAFLPNLNVYQIVAFIRSLDN			1017	0.0166786	20	VDNKFSKEVVDATIEIHYLPNLNRDQKCAFIFSLFD			1017	0.0239938	12	VDNKFSKEVVDATIEIHYLPNLNRDQKCAFIFSLLD			1017	0.00194769	1	VDNKFNKEWAYASVQICSLPNLNGLQGGAFLDSLFD							0.001	0.0026065		0.001	0.001		0.001	0.001		0.00489537	0.001
1018	0.00119208	1	VDNKFSKEVAAAVGEIDSLPNLNGSQRCAFLCSLCD			1018	0.0175126	21	VDNKFTKEVPNASDQIFLLPNLNDYQVLAFLHSLNN			1018	0.0239938	12	VDNKFSKEVVDATIEIHYLPNLNDAQRIAFIFSLFD			1018	0.00194769	1	VDNKFNKEWAYATVEILALPNLNRGQEGAFVASLSD							0.001	0.0026065		0.001	0.001		0.001	0.001		0.001	0.001
1019	0.00119208	1	VDNKFSKEVATADLQISNLPNLNPCQRNAFVISLLD			1019	0.0175126	21	VDNKFTKEVPNASDQIFLLPNLNDYQVLAFLHSLLD			1019	0.0239938	12	VDNKFSKEVVDATIEIHYLPNLNVYQIVAFIRSLDN			1019	0.00194769	1	VDNKFNKEWAYATYQIVRLPNLNRGQIPAFVVSLND							0.001	0.0026065		0.00266786	0.001		0.001	0.001		0.00294768	0.001
1020	0.00119208	1	VDNKFSKEVAAAVDEITGLPNLNVIQMGAFLASLIN			1020	0.0191804	23	VDNKFTKEVPNASDQIFLLPNLNDYQVLAFLHSLRD			1020	0.0239938	12	VDNKFSKEVVDATIEIHFLPNLNRDQKCAFIFSLFD			1020	0.00194769	1	VDNKFNKEWAYAVDQIILLPNLNQLQGRAFIFSLDD							0.00219208	0.001		0.001	0.00308121		0.001	0.001		0.001	0.001
1021	0.00119208	1	VDNKFSKEVAYANGQISCLPNLNQVQSLPSSVA*PM			1021	0.0200143	24	VDNKFTKEVPNASDQIFLLPNLNDDQVLAFLHSLRD			1021	0.0259932	13	VDNKFTKEVDSAVFEIHFLPNLNDAQRIAFIFSLFD			1021	0.00194769	1	VDNKFNKEWAYAVAQILTLPNLNDFQVPAFVLSLAD							0.00576832	0.001		0.001	0.001		0.001	0.00293446		0.001	0.001
1022	0.00119208	1	VDNKFSKEVGYANFQISNLPT*TWTSGPPSYLAWPM			1022	0.0216822	26	VDNKFTKELFNAAFEIVSLPNLNLSQERAFIISLNN			1022	0.0259932	13	VDNKFSKEVVDATIEIHYLPNLNRDQKCAFIFSLFD			1022	0.00194769	1	VDNKFNKEWAYAVYQILGLPNLNEHQGLAFLGSLDN							0.0296099	0.020278		0.001	0.001		0.001	0.00293446		0.001	0.00279459
1023	0.00119208	1	VDNKFSKEVVYAASQILVLPNLNVIQQVAFICSLGD			1023	0.0233501	28	VDNKFTKEVPNASDQIFLLPNLNDDQVLAFINSLRD			1023	0.0259932	13	VDNKFSKEVVDATIEIHYLPNLNRYQKCAFIFSLFD			1023	0.00194769	1	VDNKFNKEWAYASGEIVSLPNLNADQGSAFVPSLDD							0.00338416	0.001		0.001	0.001		0.001	0.001		0.001	0.00279459
1024	0.00119208	1	VDNKFSKEVVSAYHQIYFLPNLNGGQVGAFVSSLDN			1024	0.024184	29	VDNKFYKELFNAAFEIVSLPNLNLSQERAFIISLNN			1024	0.0279927	14	VDNKFTKEVCDAIHEIHFLPNLNDAQRIAFIFSLFD			1024	0.00194769	1	VDNKFNKEWAYASCQICILPNLNVGQVAAFVCSLGN							0.001	0.0026065		0.00266786	0.001		0.001	0.001		0.001	0.001
1025	0.00119208	1	VDNKFSKEVYTATREIAHLPNLNRIQVVRLPRQPAQ			1025	0.0258519	31	VDNKFTKEVPNASDQIFLLPNLNDDQVLAFLHSLRD			1025	0.0279927	14	VDNKFYKEVVDATIEIHYLPNLNRDQKCAFIFSLFD			1025	0.00194769	1	VDNKFNKEWAYASFEILSLPNLNPGQMTAFICSLPN							0.00457624	0.0026065		0.001	0.001		0.001	0.001		0.001	0.00279459
1026	0.00119208	1	VDNKFSKEVYYAFIEICVLPNLNRPQRVAFVASLCD			1026	0.0275197	33	VDNKFYKEVPNASDQIFLLPNLNDYQVLAFLHSLRD			1026	0.0279927	14	VDNKFSKEVVDATIEIHYLPNLNRDKKCAFIFSLFD			1026	0.00194769	1	VDNKFNKEWAYASNEIIRLPNLNERQVGAFVCSLDD							0.00219208	0.001		0.00266786	0.001		0.001	0.001		0.001	0.001
1027	0.00119208	1	VDNKFSKEVSNAIHQIYSLPNLNVVQQAAFIDSLRN			1027	0.0308554	37	VDNKFNKELHYAVHEIISLPNLNEDQELAFVISLNN			1027	0.0279927	14	VDNKFSKEVVDATIEIHYLPNLNRDQKCAFIFSMFD			1027	0.00194769	1	VDNKFNKEWAYASSEILGLPNLNRSQEFAFVPSLVN							0.00219208	0.001		0.00266786	0.001		0.001	0.00293446		0.001	0.001
1028	0.00119208	1	VDNKFSKEVSAAISQISNLPNLNDVQMCAFVSSLID			1028	0.0308554	37	VDNKFYKELCSAADEIFLLPNLNDYQVLAFLHSLRD			1028	0.0279927	14	VDNKFSKEVVDATIEIHYLPNLNRDQKCAFIFSLFY			1028	0.00194769	1	VDNKFNKEWAYASSEILGLPNLNVGQVPAFVGSLSN							0.00338416	0.00421301		0.001	0.001		0.001	0.00293446		0.001	0.001
1029	0.00119208	1	VDNKFSKEVCDAIHEIHFLPNLNAFQEFAFIFSLTN			1029	0.0341912	41	VDNKFYKELCSAADEIFVLPNLNLSQERAFIISLNN			1029	0.0279927	14	VDNKFSKELCDAIVEIHFLPNLNVDQRHAFIFSLFD			1029	0.00194769	1	VDNKFNKEWAYASIQIAGLPNLNAYQGDAFVSSLPD							0.001	0.00421301		0.001	0.001		0.00499896	0.001		0.00294768	0.001
1030	0.00119208	1	VDNKFSKEVFYANSEILSLPNLNPSQKGAFLTSLYD			1030	0.0375269	45	VDNKFNKELFNAAFEIVSLPNLNLSQERAFLHSLRD			1030	0.0279927	14	VDNKFSKELHDAVHQIFNLPNLNRDQKCAFIFSLFD			1030	0.00194769	1	VDNKFNKEWAYASIEILLLPNLNGIQEVAFVNSLRN							0.00457624	0.001		0.001	0.001		0.00899792	0.00873784		0.001	0.001
1031	0.00119208	1	VDNKFSKEVFSANAQITSLPNLNLGQKRAFLFSLGD			1031	0.0492019	59	VDNKFNKELFNAAFEIVSLPNLNLSQERAFIISLRD			1031	0.0299922	15	VDNKFNKEVVDATIEIHYLPNLNRDQKCAFIFSLFD			1031	0.00194769	1	VDNKFNKEWAYASCEISRLPNLNEGQGGAFILSLVN							0.00219208	0.001		0.0143429	0.0197309		0.001	0.001		0.001	0.00279459
1032	0.00119208	1	VDNKFSKEVFSANAQITSLPNLNLGQKDAFVTSLFN			1032	0.0508698	61	VDNKFYKELCSAADEIFVLPNLNDDQVLAFLHSLRD			1032	0.0299922	15	VDNKFSKEVVDATIEIHYLTNLNRDQKCAFIFSLFD			1032	0.00194769	1	VDNKFNKEWASATAEILYLPNLNRFQGPAFITSLAN							0.001	0.0026065		0.001	0.00308121		0.001	0.00293446		0.00294768	0.001
1033	0.00119208	1	VDNKFSKEWNSAYCQITHLPNLNGFQMHAFLVSLYD			1033	0.085061	102	VDNKFTKEVPNASDQIFLLPNLNDYQVLAFINSLRN			1033	0.0299922	15	VDNKFSKEVCDAIHEIHFLPNLNDAQRIAFIFSLFD			1033	0.00194769	1	VDNKFNKEWASAVFQICSLPNLNLAQGGAFLFSLDD							0.00219208	0.001		0.001	0.00724363		0.001	0.001		0.00489537	0.001
1034	0.00119208	1	VDNKFSKEWNTAYVEIYALPNLNEVQECAFVGSLCD			1034	0.0892306	107	VDNKFTKEVPNASDQIFLLPNLNDYQVLAFINSLRN			1034	0.0299922	15	VDNKFSKELYSAVCEIHFLPNLNPSQRLAFIFSLFD			1034	0.00194769	1	VDNKFNKEWASAASEICRLPNLNQGQRSAFVDSLGD							0.00219208	0.001		0.001	0.00308121		0.001	0.001		0.001	0.001
1035	0.00119208	1	VDNKFSKEWNSATVQIRHLPNLNQSQLSAFVSSLVD			1035	0.10174	122	VDNKFYKELCSAADEIFVLPNLNDDQVLAFLHSLRD			1035	0.0319917	16	VDNKFSKEVCDAYAQIGNLPNLNVYQIVAFIRSLDN			1035	0.00194769	1	VDNKFNKEWASAASEICRLPNLNDGQRGAFVSSLGD							0.001	0.0026065		0.00266786	0.001		0.001	0.001		0.001	0.001
1036	0.00119208	1	VDNKFSKEWNSATVQIRHLPNLNLHQRGAFVVSLCN			1036	0.129259	155	VDNKFNKEVCDAYAQIGNLPNLNVYQIVAFIRSLDN			1036	0.0319917	16	VDNKFSKELCDAIVEIHFLPNLNRDQKCAFIFSLFD			1036	0.00194769	1	VDNKFNKEWASAASEICRLPNLNEVQGAAFIPSLAD							0.00219208	0.001		0.00266786	0.001		0.00499896	0.001		0.001	0.001
1037	0.00119208	1	VDNKFSKEWTYAVDEILLLPNLNGYQGVAFVCSLGD			1037	0.16762	201	VDNKFYKELCSAADEIFVLPNLNDDQVLAFINSLRD			1037	0.0339912	17	VDNKFSKEVVDATIEIHYLPNLNRDQKCAFIFSLFD			1037	0.00194769	1	VDNKFNKEWASAVRQICGLPNLNGIQVCAFINSLDD							0.00219208	0.001		0.001	0.001		0.00299948	0.001		0.001	0.001
1038	0.00119208	1	VDNKFSKEWSTAVSQILYLPNLNVYQIVAFIRSLDN			1038	0.175959	211	VDNKFNKELFNAAFEIVSLPNLNDYQVLAFLHSLRD			1038	0.0339912	17	VDNKFSKEVCDATIEIHYLPNLNRDQKCAFIFSLFD			1038	0.00194769	1	VDNKFNKEWASASRQIGLLPNLNPHQEPAFIVSLDD							0.00219208	0.001		0.00266786	0.001		0.001	0.001		0.001	0.001
1039	0.00119208	1	VDNKFSKEWSAAVYEIVHLPNLNASQGNAFVPSLGD			1039	0.22266	267	VDNKFNKEVPNASDQIFLLPNLNDYQVLAFLHSLRD			1039	0.0339912	17	VDNKFSKEVCDAIHEIHFLPNLNDAQRIAFIFSLFD			1039	0.00194769	1	VDNKFNKEWASASRQIGLLPNLNPHQEPAFIVSLGN							0.001	0.0026065		0.001	0.001		0.001	0.001		0.001	0.001
1040	0.00119208	1	VDNKFSKEWISAFPEIVDLPNLNLTQGYAFVGSLTD			1040	0.251013	301	VDNKFTKEVPNASDQIFLLPNLNDDQVLAFINSLRN			1040	0.0359906	18	VDNKFNKEVCDAYAQIGNLPNLNRDQKCAFIFSLFD			1040	0.00194769	1	VDNKFNKEWASASRQICCLPNLNQDQGDAFIGSLVN							0.00576832	0.00421301		0.00266786	0.001		0.001	0.001		0.00294768	0.001
1041	0.00119208	1	VDNKFSKEWHNAVRQICGLPNLNLSQQNAFVNSLGN			1041	0.255183	306	VDNKFTKEVPNASDQIFLLPNLNDYQVLAFLHSLRN			1041	0.0359906	18	VDNKFSKEVVDATIEIHYLPNLNRDQKCAFIFSLFD			1041	0.00194769	1	VDNKFNKEWASASFQILSLPNLNGHQMDAFLGSLCN							0.001	0.0026065		0.00266786	0.001		0.001	0.001		0.00294768	0.001
1042	0.00119208	1	VDNKFSKEWHNADSEIILLPNLNLGQVHAFLVSLTN			1042	0.276865	332	VDNKFTKEVPNASDQIFLLPNLNLSQERAFIISLNN			1042	0.0359906	18	VDNKFSKEVCDAIHEIHFLPNLNVDQRHAFIFSLFD			1042	0.00194769	1	VDNKFNKEWASASFQILSLPNLNGPQGGAFVGSLYN							0.00338416	0.001		0.001	0.001		0.001	0.001		0.00294768	0.001
1043	0.00119208	1	VDNKFSKEWRYANYEIYVLPNLNRFQVCAFICSLAD			1043	0.319396	383	VDNKFYKELCSAADEIFVLPNLNDYQVLAFLHSLRD			1043	0.0379901	19	VDNKFTKEVDSAVFEIHILPNLNRDQKCAFIFSLFD			1043	0.00194769	1	VDNKFNKEWASASLEICNLPNLNQCQVDAFLPSLDN							0.001	0.0026065		0.00266786	0.001		0.001	0.001		0.00294768	0.001
1044	0.00119208	1	VDNKFSKEWLAAARQITSLPNLNGFQIVAFIRSLDN			1044	1.38349	1659	VDNKFYKELCSAADEIFVLPNLNDDQVLAFINSLRN			1044	0.0379901	19	VDNKFTKEVDSAVFEIHILPNLNDYQRVAFIFSLFD			1044	0.00194769	1	VDNKFNKEWASASVQICHLPNLNGTQGVAFVVSLFD							0.00934456	0.00421301		0.001	0.001		0.00299948	0.001		0.001	0.001
1045	0.00119208	1	VDNKFSKEWLNAIREISVCRT*TSTRNVPSQSAWLM			1045	2.80117	3359	VDNKFNKELFNAAFEIVSLPNLNLSQERAFIISLNN			1045	0.0379901	19	VDNKFSKEVVDATIEIHYLPNLNRDQKCAFIFSLFD			1045	0.00194769	1	VDNKFNKEWGNAITEIANLPNLNGVQERAFICSLSN							0.001	0.0026065		0.001	0.00308121		0.00299948	0.00486892		0.001	0.00279459
1046	0.00119208	1	VDNKFSKEWLDASVQIGSLPNLNLAQISAFLISLDN			1046	42.2828	50703	VDNKFTKEVPNASDQIFLLPNLNDYQVLAFLHSLRD			1046	0.0399896	20	VDNKFSKELCDAIVEIHFLPNLNDAQRIAFIFSLFD			1046	0.00194769	1	VDNKFNKEWGNAVDQILYLPNLNRGQGSAFVDSLGN							0.00219208	0.001		0.012675	0.0218121		0.001	0.00293446		0.001	0.001
1047	0.00119208	1	VDNKFSKEWLDASVQIGSLPNLNLAQISAFLISLVD									1047	0.0419891	21	VDNKFSKEVVDATIEIHYLPNLNSDQKCAFIFSLFD			1047	0.00194769	1	VDNKFNKEWGNAVVQILNLPNLNERQEGAFLYSLRN							0.00219208	0.0026065		0.001	0.00308121		0.001	0.001		0.001	0.001
1048	0.00119208	1	VDNKFSKEWDTAALEIRRLPNLNVDQRHAFLFSLFD									1048	0.0419891	21	VDNKFSKEVVDATIEIHYLPNLNEPQVCAFVSSLFD			1048	0.00194769	1	VDNKFNKEWGNASSQILSLPNLNGFQESAFVHSLYD							0.001	0.0026065		0.001	0.001		0.001	0.001		0.001	0.001
1049	0.00119208	1	VDNKFSKEWDYAVRQIIDLPNLNVDQGCAFLGSLGN									1049	0.0419891	21	VDNKFSKEVCDAIHEIHFLPNLNANQVIAFVCSLFD			1049	0.00194769	1	VDNKFNKEWGTATDQILDLPNLNLGQGSAFVCSLRD							0.00457624	0.0026065		0.001	0.001		0.001	0.001		0.001	0.001
1050	0.00119208	1	VDNKFSKEWDYAVRQIDGLPNLNLSQLDAFLTSLDD									1050	0.0419891	21	VDNKFSKELCDAIVEIHYLPNLNRDQKCAFIFSLFD			1050	0.00194769	1	VDNKFNKEWGTAVSEIISLPNLNRLQGSAFVISLCD							0.001	0.0026065		0.001	0.001		0.164957	0.964361		0.00294768	0.001
1051	0.00119208	1	VDNKFSKEWAYASAQIFYLPNLNPSQGYAFVNSLPN									1051	0.0439886	22	VDNKFYKELAYAIHEIFCLPNLNEPQVCAFVVSLCD			1051	0.00194769	1	VDNKFNKEWGDAINEILALPNLNLPQRDAFVCSLDD							0.0069604	0.0026065		0.001	0.00516242		0.001	0.001		0.001	0.00279459
1052	0.00119208	1	VDNKFSKEWASAVHEIVFLPNLNHCQEFAFVDSLTN									1052	0.0479875	24	VDNKFSKEVCDAIHEIHFLPNLNDAQRIAFIFSLFD			1052	0.00194769	1	VDNKFNKEWGDAVNQILCLPNLNELQIPAFIVSLSN							0.00219208	0.001		0.001	0.001		0.001	0.001		0.001	0.001
1053	0.00119208	1	VDNKFSKEWANATYQISNLPNLNAYQRPAFVDSLSN									1053	0.049987	25	VDNKFTKEVPDAIREIFILPNLNEGQVVAFVVSLFD			1053	0.00194769	1	VDNKFNKEWGDAVTQICRLPNLNQGQGGAFVGSLIN							0.00219208	0.001		0.00266786	0.00308121		0.001	0.001		0.001	0.001
1054	0.00119208	1	VDNKFSKEWADADVQISILPNLNHDQRSAFVVSLRD									1054	0.0519865	26	VDNKFSKEVVDATIEIHYLQNLNRDQKCAFIFSLFD			1054	0.00194769	1	VDNKFNKEWGDASRQILCLPNLNVGQLPAFITSLYD							0.00338416	0.001		0.00433572	0.001		0.00299948	0.001		0.001	0.001
1055	0.00119208	1	VDNKFSKEWADADVQISILPNLNVSQETAFVVSLCN									1055	0.053986	27	VDNKFSKEVVDATIEIHYLPNLNPSQRLAFIFSLFD			1055	0.00194769	1	VDNKFNKEWGDATDQILSLPNLNVVQGDAFVRSLDN							0.00219208	0.0026065		0.00266786	0.00308121		0.001	0.001		0.001	0.00458918
1056	0.00119208	1	VDNKFSKEWGYADFQIPCLPNLNENQELAFIGSLGD									1056	0.053986	27	VDNKFSKEVVDATIEIHYLPNLNLDQKCAFIFSLFD			1056	0.00194769	1	VDNKFNKEWGDATVQICRLPNLNEVQRCAFVYSLDD							0.00219208	0.001		0.00933931	0.00724363		0.001	0.001		0.001	0.001
1057	0.00119208	1	VDNKFSKEWGDAVFQICNLPNLNAGQEDAFIFSLSD									1057	0.0559854	28	VDNKFSKEVCDAIHEIHILPNLNDYQRVAFIFSLFD			1057	0.00194769	1	VDNKFNKEWGDATNQILGLPNLNLIQGDAFVCSLLN							0.00219208	0.00421301		0.001	0.001		0.001	0.001		0.001	0.00279459
1058	0.00119208	1	VDNKFSKEWVNASSEITRLPNLNRVQGGAFIHSLGD									1058	0.0579849	29	VDNKFSKEVDSAVFEIHILPNLNDYQRVAFIFSLFD			1058	0.00194769	1	VDNKFNKEWGDATAEILGLPNLNDNQMGAFVCSLSD							0.00219208	0.001		0.001	0.001		0.001	0.001		0.001	0.001
1059	0.00119208	1	VDNKFSKEWVTAAIQIGVLPNLNQHQQCAFLSSLLD									1059	0.0579849	29	VDNKFSKEVVDATIEIHYLPNLNRDQKCAFIFSLFD			1059	0.00194769	1	VDNKFNKEWGDAAAQIIDLPNLNACQGPAFVISLDD							0.00219208	0.001		0.001	0.001		0.001	0.00293446		0.001	0.001
1060	0.00119208	1	VDNKFSKEWVYAFVEIDGLPNLNRGQQFAFVTSLPD									1060	0.0579849	29	VDNKFSKEVVDATIEIHYLPNLNANQVIAFVCSLFD			1060	0.00194769	1	VDNKFNKEWGAAVIEILGLPNLNGGQGDAFVFSLGN							0.00219208	0.001		0.001	0.00516242		0.001	0.001		0.00879074	0.00279459
1061	0.00119208	1	VDNKFSKEWSYAVSQIDFLPNLNVYQVAAFVVSLID									1061	0.0579849	29	VDNKFSKEVVDATIEIHYLPNLNVDQRHAFIFSLFD			1061	0.00194769	1	VDNKFNKEWGAASSEIIGLPNLNLFQQVAFVHSLGD							0.00219208	0.001		0.001	0.001		0.00299948	0.001		0.001	0.00279459
1062	0.00119208	1	VDNKFSKEWCNAIFQIGCLPNLNQFQGDAFIGSLFD									1062	0.0579849	29	VDNKFSKELCDAIVEIHFLPNLNVDQRHAFIFSLFD			1062	0.00194769	1	VDNKFNKEWGAASREICALPNLNGSQENAFLYSLRD							0.00219208	0.001		0.001	0.001		0.001	0.001		0.001	0.001
1063	0.00119208	1	VDNKFSKEWFAAISQILLLPNLNRSQGPAFIGSLVN									1063	0.0639834	32	VDNKFSKEVVDATIEIHYLPNLNRDQKCAFIFSLFD			1063	0.00194769	1	VDNKFNKEWGAATSQICSLPNLNGYQGFAFLGSLTN							0.001	0.00421301		0.001	0.001		0.001	0.00293446		0.001	0.00279459
1064	0.00119208	1	VDNKFSKELTNANLQIFCLPNLNACQESASSSA*LT									1064	0.0639834	32	VDNKFSKEVVDATIEIHYLPNLNRDQRHAFIFSLFD			1064	0.00194769	1	VDNKFNKEWGAATREILSLPNLNVSQVDAFVCSLSD							0.00219208	0.001		0.0560394	0.0675987		0.00299948	0.001		0.001	0.001
1065	0.00119208	1	VDNKFSKELTNANLQIFCLPNLNACQ*SASSSA*LT									1065	0.0639834	32	VDNKFSKEVVDATIEIHYLPNLNRDQRIAFIFSLFD			1065	0.00194769	1	VDNKFNKEWGAAVCEISRLPNLNDLQENAFIASLFD							0.00219208	0.001		0.0260179	0.0488678		0.001	0.00293446		0.001	0.001
1066	0.00119208	1	VDNKFSKELSNAAAEIFSLPNLNVFQGGAFVGSLCD									1066	0.0699818	35	VDNKFTKEVDSAVFEIHILPNLNDYQRVAFIFSLFD			1066	0.00194769	1	VDNKFNKEWGYAVIQITALPNLNPNQRPAFVSSLSD							0.00219208	0.001		0.00933931	0.0363805		0.001	0.001		0.001	0.00458918
1067	0.00119208	1	VDNKFSKELIAAYHQIASLPNLNLCQLPAFLGSLVD									1067	0.0699818	35	VDNKFSKEVCDAIHEIHFLPNLNDAQRIAFIFSLFD			1067	0.00194769	1	VDNKFNKEWGYASVEILTLPNLNVDQLNAFVISLPD							0.00576832	0.010639		0.001	0.00308121		0.00499896	0.0106723		0.00294768	0.001
1068	0.00119208	1	VDNKFSKELIYAYNQIFDLPNLNVFQKSAFVVSLGN									1068	0.0719813	36	VDNKFNKELVDAIFEIFVLPNLNESQVSAFVVSLFD			1068	0.00194769	1	VDNKFNKEWGYATHQIVNLPNLNGCQGDAFVNSLYN							0.001	0.00421301		0.001	0.001		0.001	0.00293446		0.001	0.001
1069	0.00119208	1	VDNKFSKELHSAVGQIGVLPNLNQHQRYAFLCSLHN									1069	0.0719813	36	VDNKFSKEVVDATIEIHFLPNLNVDQRHAFIFSLFD			1069	0.00194769	1	VDNKFNKEWGYAIGEICALPNLNDFQECAFVSSLDD							0.0248416	0.0250975		0.001	0.00308121		0.00299948	0.001		0.00294768	0.00279459
1070	0.00119208	1	VDNKFSKELRSANCEIAHLPNLNPFQVNAFIRSLPN									1070	0.0739808	37	VDNKFTKEVDSAVFEIHILPNLNDYQRVAFIFSLFD			1070	0.00194769	1	VDNKFNKEWGYASYEICNLPNLNDSQLHAFILCD							0.001	0.0026065		0.001	0.00308121		0.001	0.00486892		0.001	0.001
1071	0.00119208	1	VDNKFSKELDAAYFEIFFLPNLNETQRSAFVVSLGD									1071	0.0759802	38	VDNKFSKEVCDAIHEIHFLPNLNPSQRLAFIFSLFD			1071	0.00194769	1	VDNKFNKEWGYASREIANLPNLNEGQMGAFVVSLGN							0.001	0.0026065		0.00266786	0.0134873		0.001	0.00873784		0.00294768	0.001
1072	0.00119208	1	VDNKFSKELDYANGEISCLPNLNVVQEGAFVRSLDN									1072	0.0879771	44	VDNKFYKELSTAVYEIFALPNLNESQVVAFVVSLFD			1072	0.00194769	1	VDNKFNKEWGSAVAEICRLPNLNRPQGRAFLRSLDD							0.00338416	0.001		0.00767145	0.001		0.001	0.001		0.001	0.00279459
1073	0.00119208	1	VDNKFSKELAYASPQIGGLPNLNVYQIVAFIRSLDN									1073	0.105972	53	VDNKFSKEVVDATIEIHYLPNLNDYQRVAFIFSLFD			1073	0.00194769	1	VDNKFNKEWGSAIVEILRLPNLNRVQGYAFLDSLHD							0.001	0.0026065		0.00266786	0.001		0.001	0.001		0.00294768	0.00279459
1074	0.00119208	1	VDNKFSKELGAAFSQISGLPNLNDCQGGAFVRSLHN									1074	0.109971	55	VDNKFTKEVDSAVFEIHILPNLNDAQRIAFIFSLFD			1074	0.00194769	1	VDNKFNKEWGNATLQILVLPNLNRNQGGAFLPSLRN							0.00219208	0.00421301		0.00266786	0.001		0.001	0.00293446		0.001	0.001
1075	0.00119208	1	VDNKFSKELGSAFCQIRCLPNLNLNQEFAFVTSLGN									1075	0.109971	55	VDNKFSKEVCDAIHEIHYLPNLNRDQKCAFIFSLFD			1075	0.00194769	1	VDNKFNKEWGNATLQILVLPNLNGFQMGAFINSLSD							0.00219208	0.001		0.00266786	0.001		0.001	0.00486892		0.00489537	0.001
1076	0.00119208	1	VDNKFSKELGNADYEIGDLPNLNASQEIAFVVSLYN									1076	0.11397	57	VDNKFSKEVCDAIHEIHFLPNLNDYQRVAFIFSLFD			1076	0.00194769	1	VDNKFNKEWGNATVQICRLPNLNQFQGFAFIPSLSN							0.001	0.0026065		0.001	0.001		0.001	0.001		0.00489537	0.001
1077	0.00119208	1	VDNKFSKELGNADYEIGDLPNLNVYQIVAFIRSLDN									1077	0.11597	58	VDNKFYKELYTAIYEIFVLPNLNESQIIAFVNSLFD			1077	0.00194769	1	VDNKFNKEWGNAAVEILNLPNLNEAQVNAFVFSLHD							0.00219208	0.001		0.0160108	0.0218121		0.001	0.001		0.001	0.001
1078	0.00119208	1	VDNKFSKELGNADYEIGDLPNLNVYQVSAFIDSLSD									1078	0.143963	72	VDNKFTKEVPNASDQIFLLPNLNDYQVLAFLHSLRD			1078	0.00194769	1	VDNKFNKEWGNATIQIVGLPNLNVNQMGAFIVSLGD							0.001	0.0026065		0.001	0.001		0.00299948	0.001		0.001	0.001
1079	0.00119208	1	VDNKFSKELVSATSEISYLPNLNQSQKYAFIFSLID									1079	0.157959	79	VDNKFSKELHDAVHQIFNLPNLNEPQVCAFVSSLFD			1079	0.00194769	1	VDNKFNKEWGNATDQILHLPNLNVVQRGAFVGSLVD							0.00338416	0.001		0.001	0.001		0.001	0.001		0.001	0.001
1080	0.00119208	1	VDNKFSKELYTAIFEIVSLPNLNGCQRCAFIISLDN									1080	0.163957	82	VDNKFSKEVCDAIHEIHFLPNLNDAQRIAFIFSLFD			1080	0.00194769	1	VDNKFNKEWGNATCQICGLPNLNQFQEDAFVISLNN							0.00219208	0.001		0.001	0.001		0.001	0.00293446		0.00294768	0.001
1081	0.00119208	1	VDNKFSKELYSAVCEIHFLPNLNDAQRIAFIFSLFD									1081	0.195949	98	VDNKFSKEVVDAIHEIHFLPNLNDAQRIAFIFSLFD			1081	0.00194769	1	VDNKFNKEWGNATCEILNLPNLNVSQGCAFISSLYN							0.00219208	0.00421301		0.0110072	0.0155685		0.001	0.001		0.001	0.001
1082	0.00119208	1	VDNKFSKELYSAVCEIHFLPNLNVYQIVAFIRSLDN									1082	0.195949	98	VDNKFSKEVCDAIHEIHFLPNLNDAQRIAFIFSLFD			1082	0.00194769	1	VDNKFNKEWGNAITQIAALPNLNVSQEGAFVDSLDN							0.001	0.0026065		0.001	0.00308121		0.00299948	0.001		0.001	0.001
1083	0.00119208	1	VDNKFSKELYSAYFQIDSLPNLNVDQQGAFLSSLFN									1083	0.227941	114	VDNKFSKELYSAVCEIHFLPNLNPSQRLAFIFSLFD			1083	0.00194769	1	VDNKFNKEWGNAIDQIVCLPNLNDDQGSAFVNSLDD							0.001	0.00581951		0.00266786	0.001		0.001	0.001		0.001	0.001
1084	0.00119208	1	VDNKFSKELSNAFFQIPNLPNLNVAQGVAFVFSLAD									1084	0.257933	129	VDNKFSKEVVDATIEIHYLPNLNRDQKCAFIFSLFD			1084	0.00194769	1	VDNKFNKEWGNAVCQIFDLPNLNGGQECAFVGSLCD							0.001	0.0026065		0.0176786	0.0363805		0.001	0.001		0.001	0.001
1085	0.00238416	2	VDNKLNKEVCDAYAQIGNLPNLNVYQIVAFIRSLDN									1085	0.26993	135	VDNKFYKELPDAIFEIFSLPNLNANQVIAFVCSLFD			1085	0.00194769	1	VDNKFNKEWGNASREIFRLPNLNAGQGVAFLDSLNN							0.001	0.0026065		0.001	0.00308121		0.001	0.001		0.00294768	0.001
1086	0.00238416	2	VDNKLTKKCAMHTPKLVICRT*TSIRQSPSFAAWTM									1086	0.281927	141	VDNKFSKEVVDATIEIHFLPNLNDAQRIAFIFSLFD			1086	0.00194769	1	VDNKFNKEWGTASAQICSLPNLNQIQGGAFLNSLTD							0.00219208	0.001		0.00266786	0.001		0.001	0.001		0.001	0.001
1087	0.00238416	2	VDNKFNKEVCDAYAQIGNLPNLNVYQIVAFIRSLDN									1087	0.333913	167	VDNKFSKEVCDAIHEIHFLPNLNRDQKCAFIFSLFD			1087	0.00194769	1	VDNKFNKEWGTATDQIVVLPNLNQIQETAFLCSLDD							91.0437	90.8504		0.001	0.001		0.00699844	0.001		0.00294768	0.001
1088	0.00238416	2	VDNKFNKEPRAARLEITVLPNLNREQGGAFIVSLWD									1088	0.42389	212	VDNKFSKELCDAIVEIHFLPNLNVDQRHAFIFSLFD			1088	0.00194769	1	VDNKFNKEWGDAITQICCLPNLNGIQGSAFLFSLGD							0.001	0.0026065		0.001	0.001		0.001	0.001		0.001	0.001
1089	0.00238416	2	VDNKFNKEPRAARLEITVLPNLNVYQIVAFIRSLDN									1089	0.46188	231	VDNKFSKEVVDATIEIHYLPNLNRDQKCAFIFSLFD			1089	0.00194769	1	VDNKFNKEWGDASIQIARLPNLNDDQGYAFITSLDN							0.00219208	0.001		0.001	0.001		0.001	0.001		0.001	0.001
1090	0.00238416	2	VDNKFNKEECDAYAQIGNLPNLNVYQIVAFIRSLDN									1090	0.603843	302	VDNKFSKEVVDATIEIHYLPNLNRDQKCAFIFSLFD			1090	0.00194769	1	VDNKFNKEWGDASVQILNLPNLNEDQGHAFVRSLNN							0.00219208	0.00421301		0.001	0.001		0.001	0.001		0.001	0.00279459
1091	0.00238416	2	VDNKFNKEGITAVREIHGLPNLNVVQRCAFITSLSD									1091	0.72981	365	VDNKFSKEVVDATIEIHYLPNLNRDQKCAFIFSLFD			1091	0.00194769	1	VDNKFNKEWGDAICQITRLPNLNVYQELAFLPSLSD							0.00219208	0.001		0.001	0.00308121		0.001	0.001		0.001	0.00279459
1092	0.00238416	2	VDNKFNKEGHYATIEICPLPNLNLYQVTAFVSSLIN									1092	0.749805	375	VDNKFNKEVCDAYAQIGNLPNLNVYQIVAFIRSLDN			1092	0.00194769	1	VDNKFNKEWGDASRQICALPNLNQGQGVAFLYSLYD							0.00219208	0.001		0.001	0.00308121		0.001	0.001		0.001	0.00279459
1093	0.00238416	2	VDNKFNKEGRASVGQIVALPNLNGSQVCAFIRSLCD									1093	0.893768	447	VDNKFSKEVVDATIEIHYLPNLNDAQRIAFIFSLFD			1093	0.00194769	1	VDNKFNKEWGDASVEILGLPNLNALQGSAFLGSLYN							0.00219208	0.001		0.001	0.001		0.001	0.00873784		0.001	0.001
1094	0.00238416	2	VDNKFNKEGRYAYFEIGSLPNLNAFQVSAFICSLCD									1094	0.953752	477	VDNKFTKEVDSAVFEIHILPNLNDYQRVAFIFSLFD			1094	0.00194769	1	VDNKFNKEWGAAIYQILSLPNLNLSQGGAFLYSLAD							0.00219208	0.001		0.001	0.001		0.00899792	0.001		0.001	0.001
1095	0.00238416	2	VDNKFNKEVSTAFLEIFHLPNLNATQLLAFIVSLYD									1095	9.38156	4692	VDNKFSKEVCDAIHEIHFLPNLNDAQRIAFIFSLFD			1095	0.00194769	1	VDNKFNKEWGAAVTEICCLPNLNQHQGVAFVHSLFD							0.001	0.0026065		0.00266786	0.00308121		0.001	0.001		0.001	0.001
1096	0.00238416	2	VDNKFNKEVSNAVVQIVDLPNLNPNQRSAFLGSLYD									1096	76.79	38405	VDNKFSKEVVDATIEIHYLPNLNRDQKCAFIFSLFD			1096	0.00194769	1	VDNKFNKEWGAAVREICRLPNLNRCQGSAFLGSLSN							0.00219208	0.001		0.001	0.00308121		0.001	0.001		0.001	0.001
1097	0.00238416	2	VDNKFNKEVSDAVHEIRNLPNLNRIQVVRLPRQPA*															1097	0.00194769	1	VDNKFNKEWGAAVGEILSLPNLNLDQEGAFVSSLPD							0.001	0.0026065		0.001	0.001		0.0149964	0.0242135		0.001	0.001
1098	0.00238416	2	VDNKFNKEVIDANCQITILPNLNDVQQFAFIDSLYN															1098	0.00194769	1	VDNKFNKEWGAAVCQICALPNLNERQGSAFVGSLHD							0.00219208	0.001		0.001	0.001		0.00299948	0.0106723		0.001	0.001
1099	0.00238416	2	VDNKFNKEVPNASDQIFLLPNLNDYQVLAFLHSLRD															1099	0.00194769	1	VDNKFNKEWGYASLEILNLPNLNANQVCAFIGSLHD							0.00219208	0.001		0.001	0.00308121		0.001	0.001		0.00294768	0.00638377
1100	0.00238416	2	VDNKFNKEVVTASPQISSLPNLNGYQVCAFVYSLRD															1100	0.00194769	1	VDNKFNKEWGYATRQILRLPNLNLGQRCAFLGSLGD							0.00219208	0.001		0.001	0.001		0.001	0.001		0.00294768	0.001
1101	0.00238416	2	VDNKFNKEVVDATIEIHYLPNLNVYQIVAFIRSLDN															1101	0.00194769	1	VDNKFNKEWGYATLEILALPNLNAHQGPAFIDSLCN							0.00338416	0.001		0.00266786	0.001		0.00299948	0.001		0.001	0.001
1102	0.00238416	2	VDNKFNKEVCDAYAQIGNLPNLNVYQIVAFIRSLDN															1102	0.00194769	1	VDNKFNKEWGYATDQILGLPNLNLPQGFAFVASLSN							0.00219208	0.001		0.00767145	0.00308121		0.00299948	0.001		0.001	0.001
1103	0.00238416	2	VDNKFNKEVCDANAQIGNLPNLNVYQIVAFIRSLDN															1103	0.00194769	1	VDNKFNKEWGYAISQILILPNLNLVQLDAFVHSLHN							0.00457624	0.00421301		0.001	0.00308121		0.001	0.001		0.001	0.001
1104	0.00238416	2	VDNKFNKEVCDAILQIGNLPNLNVYQMFAFVDSLRD															1104	0.00194769	1	VDNKFNKEWGYASLEICRLPNLNRGQVPAFVYSLND							0.001	0.0026065		0.001	0.001		0.00299948	0.00293446		0.001	0.001
1105	0.00238416	2	VDNKFNKEVCDAIHEIHFLPNLNPSQRLAFIFSLFD															1105	0.00194769	1	VDNKFNKEWGYASYQILNLPNLNQFQGTAFVNSLPD							0.00219208	0.001		0.001	0.001		0.001	0.001		0.001	0.001
1106	0.00238416	2	VDNKFNKEVCDAIHEIHFLPNLNDAQRIAFIFSLDN															1106	0.00194769	1	VDNKFNKEWGSATSEICRLPNLNHNQRPAFLDSLVN							0.001	0.0026065		0.001	0.001		0.001	0.00293446		0.001	0.001
1107	0.00238416	2	VDNKFNKEVCDAIHEIHFLPNLNDAQRIAFIFSLFD															1107	0.00194769	1	VDNKFNKEWGSASFEILNLPNLNPHQKPAFVSSLAD							0.001	0.0026065		0.55473	0.627444		0.001	0.00293446		0.001	0.001
1108	0.00238416	2	VDNKFNKEVCDAIHEIHFLPNLNDAQRIAFIRSLDN															1108	0.00194769	1	VDNKFNKEWGSASFEILNLPNLNRIQEDAFVDSLDD							0.00815248	0.00742601		0.001	0.00516242		0.001	0.001		0.001	0.001
1109	0.00238416	2	VDNKFNKEVCDAYDQIGNLPNLNVYQIVAFIRSLDN															1109	0.00194769	1	VDNKFNKEWGSAASEILALPNLNVGQRRAFVPSLSD							0.001	0.0026065		0.00767145	0.00516242		0.001	0.00293446		0.001	0.001
1110	0.00238416	2	VDNKFNKEVCDAYAQTGNLPNLNVYQIVAFIRSLDN															1110	0.00194769	1	VDNKFNKEWGSAVSQILSLPNLNEAQIPAFLVSLGD							0.00338416	0.001		0.00433572	0.001		0.001	0.00293446		0.001	0.001
1111	0.00238416	2	VDNKFNKEVCDAYAQIGNLPNLNVRQITAFVRSLDN															1111	0.00194769	1	VDNKFNKEWVNATSQIIRLPNLNDGQGSAFVGSLHD							0.001	0.0026065		0.001	0.001		0.001	0.001		0.001	0.001
1112	0.00238416	2	VDNKFNKEVCDAYAQIGNLPNLNPAQLSAFIPSLRN															1112	0.00194769	1	VDNKFNKEWVNAVIQIARLPNLNGTQGCAFIDSLSD							0.00219208	0.001		0.001	0.00516242		0.001	0.001		0.001	0.001
1113	0.00238416	2	VDNKFNKEVCDAYAQIGNLPNLNQYQEAAFISSLID															1113	0.00194769	1	VDNKFNKEWVNASREILLLPNLNVFQGPAFVSSLND							0.00576832	0.00421301		0.00266786	0.001		0.001	0.001		0.001	0.00279459
1114	0.00238416	2	VDNKFNKEVCDAYAQIGNLPNLNPPQLGAFVDSLFD															1114	0.00194769	1	VDNKFNKEWVNASREIYVLPNLNGGQGDAFVNSLDD							0.001	0.0026065		0.001	0.00308121		0.001	0.00293446		0.00489537	0.001
1115	0.00238416	2	VDNKFNKEVCDAYAQIGNLPNLNPDQRSAFVVSLSN															1115	0.00194769	1	VDNKFNKEWVNASDEILALPNLNVSQVGAFLAAWTM							0.00219208	0.001		0.001	0.001		0.001	0.001		0.001	0.001
1116	0.00238416	2	VDNKFNKEVCDAYAQIGNLPNLNRPQESAFVNSLTN															1116	0.00194769	1	VDNKFNKEWVNAVAQIVNLPNLNAIQEAAFVGSLNN							0.001	0.0026065		0.00433572	0.001		0.001	0.00293446		0.001	0.001
1117	0.00238416	2	VDNKFNKEVCDAYAQIGNLPNLNREQGGAFIVSLRD															1117	0.00194769	1	VDNKFNKEWVNASIEIVNLPNLNGLQGGAFIISLHD							0.001	0.00421301		0.352919	0.650337		0.001	0.001		0.001	0.001
1118	0.00238416	2	VDNKFNKEVCDAYAQIGNLPNLNRCQMVAFLFSLCD															1118	0.00194769	1	VDNKFNKEWVNASAEILGLPNLNRSQGGAFVCSLGD							0.001	0.00421301		0.001	0.001		0.001	0.001		0.001	0.001
1119	0.00238416	2	VDNKFNKEVCDAYAQIGNLPNLNRSQKDAFIVSLCD															1119	0.00194769	1	VDNKFNKEWVTAISEITALPNLNEGQKGAFVGSLGD							0.00338416	0.001		0.001	0.001		0.001	0.001		0.001	0.001
1120	0.00238416	2	VDNKFNKEVCDAYAQIGNLPNLNLSQRIAFIFSLYD															1120	0.00194769	1	VDNKFNKEWVTASHQISSLPNLNLAQGVAFVRSLCD							0.001	0.0026065		0.001	0.00932484		0.001	0.001		0.00489537	0.001
1121	0.00238416	2	VDNKFNKEVCDAYAQIGNLPNLNLIQRGAFLCSLDD															1121	0.00194769	1	VDNKFNKEWVTAVSEIVRLPNLNVVQEGAFLISLGD							0.00219208	0.001		0.001	0.001		0.001	0.00293446		0.001	0.001
1122	0.00238416	2	VDNKFNKEVCDAYAQIGNLPNLNLRQLFAFIHSLHD															1122	0.00194769	1	VDNKFNKEWVDATYQICILPNLNPGQEHAFLPSLCD							0.00457624	0.00421301		0.00266786	0.001		0.001	0.001		0.001	0.001
1123	0.00238416	2	VDNKFNKEVCDAYAQIGNLPNLNDAQRIAFIFSLDN															1123	0.00194769	1	VDNKFNKEWVDAVPQICGLPNLNHDQMSAFIGSLDN							0.001	0.0026065		0.001	0.001		0.001	0.001		0.001	0.001
1124	0.00238416	2	VDNKFNKEVCDAYAQIGNLPNLNEIQRSAFVFSLHD															1124	0.00194769	1	VDNKFNKEWVDATCEICDLPNLNLCQQAAFITSLDD							0.234648	0.0652601		0.00266786	0.00308121		0.00299948	0.001		0.001	0.001
1125	0.00238416	2	VDNKFNKEVCDAYAQIGNLPNLNELQKGAFVNSLRD															1125	0.00194769	1	VDNKFNKEWVDAVHEILNLPNLNHSQGPAFICSLGN							0.001	0.0026065		0.001	0.00308121		0.001	0.001		0.001	0.001
1126	0.00238416	2	VDNKFNKEVCDAYAQIGNLPNLNAIQEGAFLISLND															1126	0.00194769	1	VDNKFNKEWVDAVREILSLPNLNVFQGGAFVGSLGD							0.00338416	0.001		0.001	0.001		0.001	0.001		0.00684306	0.001
1127	0.00238416	2	VDNKFNKEVCDAYAQIGNLPNLNAYQIVAFIRSLDN															1127	0.00194769	1	VDNKFNKEWVDAVVQICDLPNLNPCQGSAFVGSLTD							0.00219208	0.001		0.001	0.001		0.00899792	0.001		0.001	0.001
1128	0.00238416	2	VDNKFNKEVCDAYAQIGNLPNLNACQEFAFVLSLGN															1128	0.00194769	1	VDNKFNKEWVDAVAQIIRLPNLNVCQEGAFVPSLVN							0.001	0.0026065		0.001	0.001		0.001	0.00293446		0.001	0.00279459
1129	0.00238416	2	VDNKFNKEVCDAYAQIGNLPNLNALQECAFIASLVN															1129	0.00194769	1	VDNKFNKEWVAATYEILGLPNLNEGQRPAFIDSLGD							0.00219208	0.0026065		0.001	0.001		0.001	0.00293446		0.001	0.001
1130	0.00238416	2	VDNKFNKEVCDAYAQIGNLPNLNAGQRSAFVLSLAN															1130	0.00194769	1	VDNKFNKEWVAATNQIVRLPNLNGSQGIAFINSLID							0.00219208	0.001		0.001	0.001		0.001	0.001		0.001	0.00279459
1131	0.00238416	2	VDNKFNKEVCDAYAQIGNLPNLNAVQVFAFLGSLGN															1131	0.00194769	1	VDNKFNKEWVAAAREICTLPNLNLVQGDAFVYSLGD							0.00338416	0.001		0.00266786	0.00516242		0.00499896	0.00486892		0.00489537	0.001
1132	0.00238416	2	VDNKFNKEVCDAYAQIGNLPNLNAFQEFAFIRSLDN															1132	0.00194769	1	VDNKFNKEWVAAVDEIVRLPNLNENQEAAFVGSLVN							0.0069604	0.0026065		0.00433572	0.001		0.00299948	0.001		0.001	0.001
1133	0.00238416	2	VDNKFNKEVCDAYAQIGNLPNLNGRQMLAFICSLLD															1133	0.00194769	1	VDNKFNKEWVAATNEIISLPNLNAHQEAAFVFSLSD							0.001	0.0026065		0.00266786	0.001		0.001	0.00293446		0.00294768	0.00279459
1134	0.00238416	2	VDNKFNKEVCDAYAQIGNLPNLNGYQVDAFLGSLFD															1134	0.00194769	1	VDNKFNKEWVAATNEIISLPNLNAHQEAAFVFSLSD							0.001	0.0026065		0.001	0.001		0.001	0.00293446		0.001	0.001
1135	0.00238416	2	VDNKFNKEVCDAYAQIGNLPNLNGSQVIAFILSLLN															1135	0.00194769	1	VDNKFNKEWVAAIVEICRLPNLNGCQGVAFVGSLDD							0.00338416	0.001		0.001	0.00308121		0.001	0.001		0.00489537	0.001
1136	0.00238416	2	VDNKFNKEVCDAYAQIGNLPNLNGSQGAAFVASLCD															1136	0.00194769	1	VDNKFNKEWVAAIVEINVLPNLNENQGCAFINSLHN							0.001	0.0026065		0.001	0.001		0.00299948	0.001		0.00684306	0.00279459
1137	0.00238416	2	VDNKFNKEVCDAYAQIGNLPNLNVNQGLAFVASLGD															1137	0.00194769	1	VDNKFNKEWVAAASEICRLPNLNGIQECAFVDSLPN							0.015305	0.00581951		0.001	0.001		0.00699844	0.001		0.001	0.001
1138	0.00238416	2	VDNKFNKEVCDAYAQIGNLPNLNVYQIVAFIRSLDN															1138	0.00194769	1	VDNKFNKEWVAAVTQILLLPNLNGFQGDAFLVSLSD							0.001	0.0026065		0.00266786	0.00308121		0.001	0.001		0.001	0.001
1139	0.00238416	2	VDNKFNKEVCDAYAQIGNLPNLNVYQIIAFIRSLDN															1139	0.00194769	1	VDNKFNKEWVAASLQILGLPNLNRRQGSAFVDSLLN							0.001	0.0026065		0.001	0.001		0.001	0.001		0.001	0.00279459
1140	0.00238416	2	VDNKFNKEVCDAYAQIGNLPNLNVYQILAFVRSLDN															1140	0.00194769	1	VDNKFNKEWVAASVEICILPNLNVSQEDAFVNSLAD							0.00219208	0.001		0.001	0.001		0.001	0.001		0.001	0.001
1141	0.00238416	2	VDNKFNKEVCDAYAQIGNLPNLNVYQIVDFL*T*LTALLVCQGIAFLYSLSD															1141	0.00194769	1	VDNKFNKEWVAASFEILHLPNLNAYQGSAFVSNLGD							0.00219208	0.001		0.001	0.001		0.001	0.001		0.00294768	0.001
1142	0.00238416	2	VDNKFNKEVCDAYAQIGNLPNLNVYQIVASIRSLDN															1142	0.00194769	1	VDNKFNKEWVYAVSEIVGLPNLNRGQMVAFIGSPRD							0.001	0.00421301		0.00433572	0.0134873		0.001	0.001		0.001	0.00279459
1143	0.00238416	2	VDNKFNKEVCDAYAQIGNLPNLNVYQIVAFTRSLDN															1143	0.00194769	1	VDNKFNKEWVYAVSEIVGLPNLNDNQGFAFLSSLSN							0.001	0.00421301		0.00266786	0.001		0.001	0.001		0.001	0.001
1144	0.00238416	2	VDNKFNKEVCDAYAQIGNLPNLNVYQIVAFIYSLYD															1144	0.00194769	1	VDNKFNKEWVYAVSEIVGLPNLNGNQGYAFIPSLDN							0.00219208	0.001		0.001	0.001		0.00299948	0.001		0.001	0.00279459
1145	0.00238416	2	VDNKFNKEVCDAYAQIGNLPNLNVYQIVAFICSLDD															1145	0.00194769	1	VDNKFNKEWVYAVDQIIGLPNLNLGQKGAFIPSLDD							0.00219208	0.001		0.00266786	0.001		0.001	0.001		0.00294768	0.001
1146	0.00238416	2	VDNKFNKEVCDAYAQIGNLPNLNVYQIVAFIFSLHN															1146	0.00194769	1	VDNKFNKEWVYASDQILHLPNLNAVQECAFVRSLPD							0.001	0.0026065		0.001	0.001		0.00299948	0.001		0.001	0.001
1147	0.00238416	2	VDNKFNKEVCDAYAQIGNLPNLNVYQIVAFIDSLSD															1147	0.00194769	1	VDNKFNKEWVYASLEICCLPNLNVSQGDAFVVSLGD							0.001	0.0026065		0.001	0.00308121		0.001	0.00293446		0.00294768	0.001
1148	0.00238416	2	VDNKFNKEVCDAYAQIGNLPNLNVYQIVAFIGSLGN															1148	0.00194769	1	VDNKFNKEWVYAFGQIDGLPNLNGSQEAAFVTSLDD							0.00219208	0.001		0.00433572	0.00932484		0.00299948	0.001		0.001	0.00279459
1149	0.00238416	2	VDNKFNKEVCDAYAQIGNLPNLNVYQIVAFIRSLDN															1149	0.00194769	1	VDNKFNKEWVYAAGQIVVLPNLNGAQGDAFIPSLGD							0.001	0.0026065		0.001	0.00516242		0.001	0.00486892		0.001	0.001
1150	0.00238416	2	VDNKFNKEVCDAYAQIGNLPNLNVYQIVAFIRSLNN															1150	0.00194769	1	VDNKFNKEWVYASSQILSPAELKPEPAGCLRSQPVR							0.00219208	0.001		0.001	0.001		0.001	0.001		0.001	0.00279459
1151	0.00238416	2	VDNKFNKEVCDAYAQIGNLPNLNVYQIVAFIRSLTD															1151	0.00194769	1	VDNKFNKEWVYASVEILSLPNLNVPQKYAFLPSLHN							0.00219208	0.001		0.00767145	0.001		0.001	0.001		0.001	0.001
1152	0.00238416	2	VDNKFNKEVCDAYAQIGNLPNLNVYQIVAFIRSLTD															1152	0.00194769	1	VDNKFNKEWVYASVEILSLPNLNVSQEVAFVHSLPN							0.00219208	0.001		0.001	0.00308121		0.001	0.001		0.001	0.001
1153	0.00238416	2	VDNKFNKEVCDAYAQIGNLPNLNVYQIVAFIRSLIN															1153	0.00194769	1	VDNKFNKEWVYASFEILDLPNLNGGQRPAFLCSLSN							0.00338416	0.001		0.001	0.00308121		0.00299948	0.001		0.001	0.001
1154	0.00238416	2	VDNKFNKEVCDAYAQIGNLPNLNVYQIVAFIRSLID															1154	0.00194769	1	VDNKFNKEWVYASNQIACLPNLNGGQGNAFVCSLVD							0.00219208	0.001		0.00266786	0.001		0.001	0.001		0.001	0.001
1155	0.00238416	2	VDNKFNKEVCDAYAQIGNLPNLNVYQIVAFIRSLPD															1155	0.00194769	1	VDNKFNKEWVSATRQICSLPNLNDYQMVAFVSSLDN							0.001	0.0026065		0.001	0.001		0.001	0.001		0.001	0.001
1156	0.00238416	2	VDNKFNKEVCDAYAQIGNLPNLNVYQIVAFIRSLEN															1156	0.00194769	1	VDNKFNKEWVSATVQILDLPNLNEYQVLAFVSSLDD							0.00219208	0.001		0.00767145	0.00516242		0.001	0.001		0.001	0.00279459
1157	0.00238416	2	VDNKFNKEVCDAYAQIGNLPNLNVYQIVAFIRSLAD															1157	0.00194769	1	VDNKFNKEWVSAVREITNLPNLNLGQGDAFVGSLFN							0.00338416	0.001		0.001	0.00308121		0.001	0.001		0.001	0.001
1158	0.00238416	2	VDNKFNKEVCDAYAQIGNLPNLNVYQIVAFIRSLGN															1158	0.00194769	1	VDNKFNKEWVSASREICLLPNLNLCQECAFVHSLRN							0.00219208	0.001		0.00266786	0.001		0.001	0.001		0.001	0.001
1159	0.00238416	2	VDNKFNKEVCDAYAQIGNLPNLNVYQIVAFIRSLGD															1159	0.00194769	1	VDNKFNKEWVSATAQILRLPNLNQCQKRAFLASLAN							0.00338416	0.001		0.00266786	0.001		0.001	0.001		0.001	0.001
1160	0.00238416	2	VDNKFNKEVCDAYAQIGNLPNLNVYQIVAFIRSLGN															1160	0.00194769	1	VDNKFNKEWVSATAQILRLPNLNEGQECAFVPSLSD							0.001	0.00421301		0.00266786	0.001		0.001	0.001		0.00294768	0.001
1161	0.00238416	2	VDNKFNKEVCDAYAQIGNLPNLNVYQIVAFIRSLVN															1161	0.00194769	1	VDNKFNKEWVSATSEILRLPN*TCIRGLPSFSACPT							0.00219208	0.00581951		0.001	0.00308121		0.001	0.001		0.001	0.00279459
1162	0.00238416	2	VDNKFNKEVCDAYAQIGNLPNLNVYQIVAFIRSLYD															1162	0.00194769	1	VDNKFNKEWVSAAVEILGLPNLNHGQEGAFVGSLSD							0.001	0.00421301		0.001	0.001		0.001	0.00293446		0.001	0.00458918
1163	0.00238416	2	VDNKFNKEVCDAYAQIGNLPNLNVYQIVAFIRSLSN															1163	0.00194769	1	VDNKFNKEWVSASYEILCLPNLNPAQENAFVVSLLN							0.001	0.0026065		0.001	0.00516242		0.001	0.00293446		0.001	0.00279459
1164	0.00238416	2	VDNKFNKEVCDAYAQIGNLPNLNVYQIVAFIRSLSN															1164	0.00194769	1	VDNKFNKEWVNATHEICCLPNLNVIQRPAFISSLND							0.001	0.00421301		0.001	0.001		0.00299948	0.0106723		0.001	0.001
1165	0.00238416	2	VDNKFNKEVCDAYAQIGNLPNLNVYQIVAFIRSLSD															1165	0.00194769	1	VDNKFNKEWVNAVDQIIDLPNLNRRQEGAFLSSLVN							0.00338416	0.001		0.00266786	0.001		0.001	0.001		0.00294768	0.001
1166	0.00238416	2	VDNKFNKEVCDAYAQIGNLPNLNVYQIVAFIRSLCN															1166	0.00194769	1	VDNKFNKEWVNAVYQICDLPNLNRCQGGAFVYSLAD							0.00219208	0.001		0.00266786	0.001		0.00299948	0.001		0.001	0.001
1167	0.00238416	2	VDNKFNKEVCDAYAQIGNLPNLNVYQIVAFIRSLCN															1167	0.00194769	1	VDNKFNKEWVNAVSQILCLPNLNHVQGPAFVSSLSD							0.00219208	0.001		0.00266786	0.001		0.001	0.001		0.001	0.001
1168	0.00238416	2	VDNKFNKEVCDAYAQIGNLPNLNVYQIVAFIRSLFN															1168	0.00194769	1	VDNKFNKEWVNAVGEISILPNLNGSQQHAFVNSLCD							0.00219208	0.001		0.00433572	0.00516242		0.00299948	0.001		0.001	0.001
1169	0.00238416	2	VDNKFNKEVCDAYAQIGNLPNLNVYQIVAFIRSLFN															1169	0.00194769	1	VDNKFNKEWVNAVGEICNLPNLNGPQRVAFIPSLVN							0.00338416	0.001		0.001	0.00308121		0.0589849	0.0106723		0.001	0.00279459
1170	0.00238416	2	VDNKFNKEVCDAYAQIGNLPNLNVYQIVAFIRSLDN															1170	0.00194769	1	VDNKFNKEWVNAVGEICSLPNLNQIQQVAFLPSLGD							0.001	0.0026065		0.001	0.001		0.001	0.001		0.001	0.00458918
1171	0.00238416	2	VDNKFNKEVCDAYAQIGNLPNLNVYQIVAFIRSLDN															1171	0.00194769	1	VDNKFNKEWVNAVGEICSLPNLNPVQVGAFIDSLID							0.001	0.0026065		0.001	0.001		0.001	0.00293446		0.001	0.00279459
1172	0.00238416	2	VDNKFNKEVCDAYAQIGNLPNLNVYQIVAFICSLND															1172	0.00194769	1	VDNKFNKEWVNAVGEICSLPNLNLSQGPAFLGSLVN							0.00219208	0.001		0.00266786	0.001		0.001	0.001		0.00294768	0.001
1173	0.00238416	2	VDNKFNKEVCDAYAQIGNLPNLNVYQIVAFICSLDN															1173	0.00194769	1	VDNKFNKEWVNAVGEICSLPNLNENQGDAFIGSLGN							0.00219208	0.001		0.001	0.001		0.00299948	0.001		0.001	0.00279459
1174	0.00238416	2	VDNKFNKEVCDAYAQIGNLPNLNVYQIVAFLSSLSN															1174	0.00194769	1	VDNKFNKEWVNAVGEICSLPNLNADQGCAFVGSLDN							0.001	0.0026065		0.001	0.001		0.001	0.00293446		0.001	0.001
1175	0.00238416	2	VDNKFNKEVCDAYAQIGNLPNLNVYQIVAFLDSLAN															1175	0.00194769	1	VDNKFNKEWVNAVGEICSLPNLNGTQERAFVSSLND							0.001	0.0026065		0.001	0.00308121		0.00499896	0.001		0.00294768	0.001
1176	0.00238416	2	VDNKFNKEVCDAYAQIGNLPNLNVYQIVAFVSSLID															1176	0.00194769	1	VDNKFNKEWVNAVGEICSLPNLNGVQESAFISSLGD							0.00338416	0.001		0.001	0.001		0.00299948	0.001		0.001	0.001
1177	0.00238416	2	VDNKFNKEVCDAYAQIGNLPNLNVYQIVAFVYSLDD															1177	0.00194769	1	VDNKFNKEWVNAVGEICSLPNLNGVQESAFVVSLDN							0.001	0.0026065		0.00266786	0.001		0.001	0.00293446		0.001	0.001
1178	0.00238416	2	VDNKFNKEVCDAYAQIGNLPNLNVYQIFAFVRSLAD															1178	0.00194769	1	VDNKFNKEWVNAVGEICSLPNLNGVQEGAFVGSLDD							0.001	0.0026065		0.001	0.00308121		0.001	0.001		0.001	0.00279459
1179	0.00238416	2	VDNKFNKEVCDAYAQIGNLPNLNVYQVVAFIRSLDN															1179	0.00194769	1	VDNKFNKEWVNAVGEICSLPNLNVAQEPAFLGSLVD							0.00219208	0.001		0.00433572	0.001		0.001	0.001		0.001	0.001
1180	0.00238416	2	VDNKFNKEVCDAYAQIGNLPNLNVYLIVAFIRSLDN															1180	0.00194769	1	VDNKFNKEWVNAVGEICSLPNLNVGQQVAFVDSLGN							0.00338416	0.0026065		0.00433572	0.001		0.001	0.00486892		0.00294768	0.001
1181	0.00238416	2	VDNKFNKEVCDAYAQIGNLPNLNVYQIVAFIRSLDN															1181	0.00194769	1	VDNKFNKEWVNAVGEICVLPNLNVTQGSAFVDSLID							0.001	0.0026065		0.00266786	0.001		0.001	0.001		0.001	0.001
1182	0.00238416	2	VDNKFNKEVCDAYAQIGNLPNLNVFQLCAFIVSLDN															1182	0.00194769	1	VDNKFNKEWVNAVYQIVNLPNLNECQGTAFIDSLGN							0.001	0.00581951		0.001	0.001		0.001	0.001		0.001	0.001
1183	0.00238416	2	VDNKFNKEVCDAYAQIGNLPNLNVFQIVAFIRSLDN															1183	0.00194769	1	VDNKFNKEWVTATLEICGLPNLNGIQENAFLFSLID							0.001	0.0026065		0.001	0.001		0.001	0.00486892		0.001	0.001
1184	0.00238416	2	VDNKFNKEVCDAYAQIGNLPNLNVSQLTAFVDSLFD															1184	0.00194769	1	VDNKFNKEWVTAIVQITSLPNLNVCQECAFICSLGD							0.001	0.00421301		0.001	0.00724363		0.001	0.00486892		0.001	0.001
1185	0.00238416	2	VDNKFNKEVCDAYAQIGNLPNLNVIQKPAFLDSLYD															1185	0.00194769	1	VDNKFNKEWVTAASQILILPNLNGIQEGAFVRSLRD							0.00815248	0.0154585		0.00266786	0.001		0.00299948	0.001		0.001	0.001
1186	0.00238416	2	VDNKFNKEVCDAYAQIGNLPNLNVDQILAFVLSLAD															1186	0.00194769	1	VDNKFNKEWVTAASQILRLPNLNQAQEGAFIYSLNN							0.00338416	0.001		0.001	0.001		0.001	0.001		0.001	0.001
1187	0.00238416	2	VDNKFNKEVCDAYAQIGNLPNLNVDQILAFVDSLRD															1187	0.00194769	1	VDNKFNKEWVTATRQILYLPNLNGIQGVAFIPSLDD							0.001	0.0026065		0.00266786	0.001		0.00299948	0.001		0.001	0.001
1188	0.00238416	2	VDNKFNKEVCDAYAQIGNLPNLNVYQMFAFVDSLSG															1188	0.00194769	1	VDNKFNKEWVTASRQILALPNLNLNQKDAFIHSLND							0.00219208	0.001		0.001	0.001		0.001	0.00680338		0.001	0.001
1189	0.00238416	2	VDNKFNKEVCDAYAQIGNLPNLNVYQEDAFIVSLYN															1189	0.00194769	1	VDNKFNKEWVTASVQIIILPNLNAGQGCAFLPSLAD							0.00219208	0.0026065		0.001	0.001		0.001	0.001		0.001	0.001
1190	0.00238416	2	VDNKFNKEVCDAYAQIGNLPNLNVYQVSAFIDSLSD															1190	0.00194769	1	VDNKFNKEWVDAIDQIVHLPNLNLAQEDAFVVSLSD							0.001	0.0026065		0.001	0.001		0.001	0.001		0.001	0.00279459
1191	0.00238416	2	VDNKFNKEVCDAYAQIGNLPNLNLYQMFAFVDSLRD															1191	0.00194769	1	VDNKFNKEWVDAVGQILNLPNLNRVQGYAFLLSLGD							0.001	0.00421301		0.001	0.001		0.001	0.001		0.001	0.00279459
1192	0.00238416	2	VDNKFNKEVCDAYAQIGNLPNLTSIRQSPSFAAWTM															1192	0.00194769	1	VDNKFNKEWVDASRQIISLPNLNLCQGHAFVHSLYD							0.00219208	0.001		0.001	0.00308121		0.001	0.001		0.001	0.001
1193	0.00238416	2	VDNKFNKEVCDAYAQIGNLANLNVYQIVAFIRSLDN															1193	0.00194769	1	VDNKFNKEWVDASFEILALPNLNEVQENAFVDSLVD							0.00457624	0.0026065		0.00933931	0.00932484		0.00299948	0.001		0.00294768	0.001
1194	0.00238416	2	VDNKFNKEVCDAYAQIGSLPNLNVYQIVAFIRSLDN															1194	0.00194769	1	VDNKFNKEWVDASGEILSLPNLNLGQETAFVCSLDN							0.00219208	0.001		0.00933931	0.0134873		0.001	0.001		0.0107384	0.00279459
1195	0.00238416	2	VDNKFNKEVCDAYAQIGNLPNLNVYQIVAFIRSLDN															1195	0.00194769	1	VDNKFNKEWVDASYEIRNLPNLNPFQKPAFVSSLTD							0.00219208	0.001		0.001	0.001		0.00899792	0.00293446		0.00294768	0.001
1196	0.00238416	2	VDNKFNKEVCDAYAQIGNLPNLNVYQIVAFIRSLDN															1196	0.00194769	1	VDNKFNKEWVDATSEILSLPNLNGCQRGAFVGSLSD							0.001	0.0026065		0.001	0.001		0.00299948	0.001		0.001	0.001
1197	0.00238416	2	VDNKFNKEVCDAYAQIFFLPNLNRVQVRAFLYSLSD															1197	0.00194769	1	VDNKFNKEWVDAAVQISVLPNLNHAQGDAFVLSLCD							0.00219208	0.001		0.00767145	0.00308121		0.00299948	0.001		0.00294768	0.001
1198	0.00238416	2	VDNKFNKEVCDAYAPIGNLPNLNVYQIVAFIRSLDN															1198	0.00194769	1	VDNKFNKEWVDAYVEITCLPNLNLGQQNAFLYSLDD							0.00457624	0.0026065		0.00266786	0.001		0.001	0.00293446		0.001	0.001
1199	0.00238416	2	VDNKFNKEVCDAQAQIGNLPNLNVYQIVAFIRSLDN															1199	0.00194769	1	VDNKFNKEWVDASNQICALPNLNGGQGAAFLCSLVD							0.00219208	0.001		0.00266786	0.001		0.001	0.001		0.00489537	0.00279459
1200	0.00238416	2	VDNKFNKEVCDASHEISFLPNLNDNQKYAFVYSLFN															1200	0.00194769	1	VDNKFNKEWVDASREILACRT*TGASGLPSYAA*AM							0.00219208	0.001		0.001	0.001		0.001	0.001		0.001	0.00279459
1201	0.00238416	2	VDNKFNKEVCDGYAQIGNLPNLNVYQIVAFIRSLDN															1201	0.00194769	1	VDNKFNKEWVDASDQICSLAELKRVPEVCLRHQPE*							0.00219208	0.001		0.00600359	0.00724363		0.001	0.001		0.00489537	0.001
1202	0.00238416	2	VDNKFNKEVCDVYAQIGNLPNLNVYQIVAFIRSLDN															1202	0.00194769	1	VDNKFNKEWVDASRQIYRLPNLNESQQPAFVDSLNN							0.00934456	0.0122455		0.001	0.001		0.001	0.001		0.001	0.00458918
1203	0.00238416	2	VDNKFNKEVCYAIIEIYSLPNLNPIQGYAFICSLND															1203	0.00194769	1	VDNKFNKEWVDASAQILVLPNLNPHQGSAFVFSLHD							0.001	0.0026065		0.001	0.001		0.00299948	0.001		0.001	0.00279459
1204	0.00238416	2	VDNKFNKEVFNAYIEISSLPNLNDCQRDAFLGSLSN															1204	0.00194769	1	VDNKFNKEWVAATAQICLLPNLNVGQESAFVPSLHD							0.172659	0.0716861		0.001	0.001		0.001	0.001		0.00294768	0.001
1205	0.00238416	2	VDNKFNKEVFYASYQIRCLPNLNQYQEAAFISSLID															1205	0.00194769	1	VDNKFNKEWVAAVRQICSLPNLNEIQGGAFVLNLCD							0.00219208	0.001		0.00600359	0.001		0.001	0.00293446		0.001	0.00279459
1206	0.00238416	2	VDNKFNKEWNAAFNEIDFLPNLNDGQQFAFLSSLGN															1206	0.00194769	1	VDNKFNKEWVAASSQICGLPNLNGIQEDAFVTSLLD							0.00219208	0.001		0.00933931	0.0134873		0.00699844	0.001		0.001	0.001
1207	0.00238416	2	VDNKFNKEWHYAISQISVLPNLNLHQRYAFIVSLGD															1207	0.00194769	1	VDNKFNKEWVAASNEIALLPNLNVVQQCAFVGSLHD							0.00219208	0.0026065		0.0276858	0.0134873		0.00299948	0.00293446		0.001	0.001
1208	0.00238416	2	VDNKFNKEWGTATSQIYRLPNLNAFQEFAFIFSLTN															1208	0.00194769	1	VDNKFNKEWVAASIEISRLPNLNLDQVDAFIPSLGD							0.001	0.0026065		0.00266786	0.001		0.001	0.001		0.001	0.001
1209	0.00238416	2	VDNKFNKEWGTAYDEIFNLPNLNHIQRCAFVGSLHN															1209	0.00194769	1	VDNKFNKEWVAATFEITRLPNLNPCQEFAFVGSLRD							0.00934456	0.001		0.00266786	0.00308121		0.001	0.001		0.00294768	0.001
1210	0.00238416	2	VDNKFNKEWCDAVAEISYLPNLNASQKLAFLCSLCN															1210	0.00194769	1	VDNKFNKEWVAAAREILALPNLNHGQGSAFLHSLGN							0.001	0.0026065		0.00266786	0.001		0.001	0.00293446		0.001	0.00279459
1211	0.00238416	2	VDNKFNKELHYAAIQIVLLPNLNEYQIVAFIRSLDN															1211	0.00194769	1	VDNKFNKEWVAAAREILALPNLNGVQGDAFVSSLGD							0.00219208	0.001		0.001	0.001		0.001	0.001		0.001	0.00279459
1212	0.00238416	2	VDNKFNKELCSAVYQICILPNLNGGQQCAFILSLSD															1212	0.00194769	1	VDNKFNKEWVAAAREILALPNLNGVQGSAFIISLTD							0.00219208	0.001		0.001	0.001		0.001	0.00293446		0.001	0.00279459
1213	0.00238416	2	VDNKFNKELFAAVGEITDLPNLNGDQGGAFVSSLID															1213	0.00194769	1	VDNKFNKEWVAAVTQIVNLPNLNDCQMTAFVCSLPN							0.00338416	0.001		0.001	0.001		0.001	0.001		0.001	0.001
1214	0.00238416	2	VDNKFNK*VCDAYAQIGNLPNLNVYQIVAFIRSLDN															1214	0.00194769	1	VDNKFNKEWVAASDEICSLPNLNHRQGSAFVNSLGD							0.001	0.0026065		0.00266786	0.00724363		0.001	0.00293446		0.00294768	0.001
1215	0.00238416	2	VDNKFNKEPRAARLEITVLPNLNREQGGAFIVSLWD															1215	0.00194769	1	VDNKFNKEWVAASAEILHLPNLNASQGCAFVDSLTN							0.001	0.0026065		0.001	0.001		0.001	0.00486892		0.001	0.001
1216	0.00238416	2	VDNKFNKEGNYANSQICGLPNLNALQLVAFLHSLND															1216	0.00194769	1	VDNKFNKEWVAASNEILGLPNLNGCQLRAFIPSLVN							0.001	0.0026065		0.001	0.00308121		0.001	0.001		0.001	0.001
1217	0.00238416	2	VDNKFNKEGADAILQIGNLPNLNREQGGAFIVSLWD															1217	0.00194769	1	VDNKFNKEWVYATTQICSLPNLNGHQEGAFIGSLND							0.00219208	0.001		0.001	0.001		0.001	0.001		0.001	0.001
1218	0.00238416	2	VDNKFNKEGADAILQIGNLPNLNVRQITAFVRSLSD															1218	0.00194769	1	VDNKFNKEWVYATTQICSLPNLNGHQEGAFIGSLGN							0.001	0.0026065		0.001	0.00516242		0.001	0.00293446		0.001	0.00279459
1219	0.00238416	2	VDNKFNKEGVYANFEICCLPNLNELQKGAFVNSLRD															1219	0.00194769	1	VDNKFNKEWVYATIQIANLPNLNRHQMDAFVGSLGD							0.00219208	0.001		0.00266786	0.00516242		0.001	0.001		0.00294768	0.00279459
1220	0.00238416	2	VDNKFNKEGVYADVQISGLPNLNEDQVCAFLGSLSN															1220	0.00194769	1	VDNKFNKEWVYAVDEILDLPNLNDHQGGAFVHSLFN							0.00219208	0.001		0.001	0.001		0.001	0.00293446		0.001	0.001
1221	0.00238416	2	VDNKFNKEVISATNEIVVLPNLNAFQEFAFIFSLTN															1221	0.00194769	1	VDNKFNKEWVYAVTQILHLPNLNAFQGGAFVGSLDN							0.001	0.00421301		0.00600359	0.0155685		0.001	0.00293446		0.001	0.001
1222	0.00238416	2	VDNKFNKEVIYANYEISVLPNLNAFQEFAFIFSLTN															1222	0.00194769	1	VDNKFNKEWVYASNQILVLPNLNEVQQDAFLCSLNN							0.001	0.0026065		0.00433572	0.001		0.001	0.001		0.001	0.001
1223	0.00238416	2	VDNKFNKEVISASDQINVLPNLNLFQGTAFVGSLRD															1223	0.00194769	1	VDNKFNKEWVYASTQILCLPNLNESQECAFLDSLGN							0.001	0.0026065		0.001	0.001		0.001	0.00873784		0.001	0.001
1224	0.00238416	2	VDNKFNKEVYNAYCEITSLPNLNLAQRRAFIISLGD															1224	0.00194769	1	VDNKFNKEWVYASREILNLPNLNQCQENAFLSSLVD							0.00457624	0.001		0.001	0.001		0.00299948	0.001		0.001	0.001
1225	0.00238416	2	VDNKFNKEWIYAYVQIPYLPNLNVVQVNAFLDSLSD															1225	0.00194769	1	VDNKFNKEWVYASAQILRLPNLNLSQRGAFVTSLCD							0.0069604	0.00421301		0.179461	0.198715		0.001	0.001		0.00489537	0.001
1226	0.00238416	2	VDNKFNKEWADADVQISILPNLNVYQIVAFIRSLDN															1226	0.00194769	1	VDNKFNKEWVYASAQIAVLPNLNECQGCAFVFSLND							0.00219208	0.001		0.001	0.00516242		0.001	0.001		0.001	0.001
1227	0.00238416	2	VDNKFNKEWGTATSQIYRLPNLNPPQGPAFVSSLID															1227	0.00194769	1	VDNKFNKEWVYASYEICRLPNLNPSQGGAFLPSLVD							0.00576832	0.00421301		0.00266786	0.001		0.001	0.00293446		0.00294768	0.001
1228	0.00238416	2	VDNKFNKEWGTATSQIYRLPNLNREQGGAFIVSLWD															1228	0.00194769	1	VDNKFNKEWVYATSEILRLPNLNVNQEYAFIDSLHN							0.00219208	0.001		0.001	0.001		0.001	0.001		0.001	0.00279459
1229	0.00238416	2	VDNKFNKEWGTATSQIYRLPNLNAFQEFAFIFSLDN															1229	0.00194769	1	VDNKFNKEWVYATIQILALPNLNGAQEHAFVGSLGD							0.00338416	0.001		0.00433572	0.001		0.001	0.001		0.001	0.001
1230	0.00238416	2	VDNKFNKEWGTATSQIYRLPNLNAFQEFAFIFSLCD															1230	0.00194769	1	VDNKFNKEWVYATLEIIGLPNLNETQGVAFVGSLCD							0.00219208	0.00581951		0.00266786	0.001		0.001	0.001		0.001	0.001
1231	0.00238416	2	VDNKFNKEWGTATSQIYRLPNLNAFQEAAFVTSLPN															1231	0.00194769	1	VDNKFNKEWVYAAYQILHLPNLNHAQEVAFVPSLSN							0.00219208	0.001		0.001	0.00516242		0.00299948	0.001		0.00294768	0.001
1232	0.00238416	2	VDNKFNKEWCAAVIQIIHLPNLNRHQIIAFIRSLDN															1232	0.00194769	1	VDNKFNKEWVYASFQICSLPNLNASQGTAFVGSLLN							0.001	0.0026065		0.001	0.0134873		0.001	0.001		0.001	0.001
1233	0.00238416	2	VDNKFNKEWCAAVHQIGFLPNLNLHQINAFVISLFN															1233	0.00194769	1	VDNKFNKEWVYASFQICSLPNLNGDQGTAFLNSLFN							0.00219208	0.001		0.001	0.001		0.001	0.00293446		0.001	0.001
1234	0.00238416	2	VDNKFNKELAAAINQIGGLPNLNDGQVIAFVGSLID															1234	0.00194769	1	VDNKFNKEWVYASSQICGLPNLNGYQGVAFVCSLTD							0.001	0.0026065		0.0160108	0.00308121		0.001	0.001		0.00294768	0.00279459
1235	0.00238416	2	VDNKFNKELGSATYEIGFLPNLNVSQLHAFVSSLVD															1235	0.00194769	1	VDNKFNKEWVYAFYQICDLPNLNGSQLYAFIPSLNN							0.00219208	0.001		0.001	0.001		0.001	0.001		0.001	0.001
1236	0.00238416	2	VDNKFNKELVNAYIQISVLPNLNVFQGDAFLGSLID															1236	0.00194769	1	VDNKFNKEWVSATAEICRLPNLNGFQGRAFVGSLND							0.001	0.0026065		0.00266786	0.001		0.00299948	0.001		0.001	0.001
1237	0.00238416	2	VDNKFNKELFDAIGQIFALPNLNVVQGFAFLDSLVD															1237	0.00194769	1	VDNKFNKEWVSATHEILALPNLNGNQGIAFVVSLDD							0.001	0.0026065		0.00266786	0.001		0.001	0.00293446		0.00489537	0.001
1238	0.00238416	2	VDNKFTKEGHSAAIEIFRLPNLNVDQRTAFVCSLSD															1238	0.00194769	1	VDNKFNKEWVSAYSEIGVLPNLNRAQRGAFLYSLNN							0.001	0.0026065		0.001	0.001		0.001	0.001		0.001	0.001
1239	0.00238416	2	VDNKFTKEVIYANSEICCLPNLNLTQEDAFLGSLHN															1239	0.00194769	1	VDNKFNKEWVSASSQILNLPNLNGGQGRAFVDSLGN							0.00219208	0.001		0.001	0.001		0.001	0.001		0.001	0.00279459
1240	0.00238416	2	VDNKFTKEVIYANSEICCLPNLNLRQGSAFVSSLRD															1240	0.00194769	1	VDNKFNKEWVSASRQILCLPNLNGCQQFAFVSSLGN							0.00219208	0.001		0.001	0.00516242		0.001	0.001		0.001	0.001
1241	0.00238416	2	VDNKFTKEVPNASDQIFLLPNLNLSQERAFIISLNN															1241	0.00194769	1	VDNKFNKEWVSASAQILFLPNLNEAQEGAFVNSLSN							0.001	0.0026065		0.001	0.001		0.001	0.001		0.001	0.001
1242	0.00238416	2	VDNKFTKEVPNASDQIFLLPNLNDYQVLAFLHSLLN															1242	0.00194769	1	VDNKFNKEWVSASVQICRLPNLNEAQGNAFLGSLDD							0.00457624	0.001		0.001	0.001		0.001	0.001		0.00294768	0.001
1243	0.00238416	2	VDNKFTKEVPAASNEIHDLPNLNANQMDAFVYSLDN															1243	0.00194769	1	VDNKFNKEWYNATRQIIRLPNLNLGQGAAFVSSLDN							0.00219208	0.001		0.00433572	0.001		0.001	0.00293446		0.001	0.001
1244	0.00238416	2	VDNKFTKEVRTAVSEIHGLPNLNVFQGNAFVISLRD															1244	0.00194769	1	VDNKFNKEWYNASCEILRLPNLNDFQRSAFVVSLGD							0.001	0.0026065		0.001	0.001		0.001	0.00293446		0.00294768	0.001
1245	0.00238416	2	VDNKFTKEVRDAFVEIRNLPNLNPSQMFAFVVSLLD															1245	0.00194769	1	VDNKFNKEWYNASLEILRLPNLNGCQVNAFIGSLPN							0.00219208	0.001		0.001	0.00308121		0.001	0.001		0.00294768	0.001
1246	0.00238416	2	VDNKFTKEVGTAVYEIPLLPNLNDLQGDAFILSLDN															1246	0.00194769	1	VDNKFNKEWYTAVCQILDLPNLNVSQEFAFLPSLYD							0.00338416	0.001		0.001	0.001		0.001	0.001		0.001	0.001
1247	0.00238416	2	VDNKFTKEWDNAVGEIGSLPNLNGGQEAAFVCSLIN															1247	0.00194769	1	VDNKFNKEWYTATTQIIRLPNLNQIQGCAFIDSLID							0.001	0.0026065		0.00266786	0.001		0.00299948	0.0396892		0.001	0.001
1248	0.00238416	2	VDNKFTKEWSYAVSEISSLPNLNDDQILAFLASLIN															1248	0.00194769	1	VDNKFNKEWYDATRQIVCLPNLNGGQECAFIHSLSD							0.0355703	0.0250975		0.00266786	0.001		0.001	0.001		0.00294768	0.00458918
1249	0.00238416	2	VDNKFTKELFSANSQICCLPNLNVCQGGAFLISLCD															1249	0.00194769	1	VDNKFNKEWYDASVQICHLPNLNLGQECAFVSSLID							0.001	0.0026065		0.001	0.001		0.001	0.001		0.001	0.00279459
1250	0.00238416	2	VDNKFTKEGFYAANQIFDLPNLNLGQQTAFLISLFD															1250	0.00194769	1	VDNKFNKEWYDASSEILALPNLNVGQGDAFIGSLSD							0.001	0.0026065		0.00266786	0.001		0.001	0.001		0.001	0.00279459
1251	0.00238416	2	VDNKFTKEVIAATRQICILPNLNECQQVAFVPSLID															1251	0.00194769	1	VDNKFNKEWYDASFEILSLPNLNANQEAAFVDSLDD							0.001	0.0026065		0.001	0.001		0.00899792	0.0242135		0.001	0.001
1252	0.00238416	2	VDNKFTKEVHAAIFEIDVLPNLNHDQGGAFISSLFD															1252	0.00194769	1	VDNKFNKEWYAASIQILNLPNLNGVQRSAFLDSLGD							0.001	0.0026065		0.00266786	0.001		0.001	0.001		0.001	0.00279459
1253	0.00238416	2	VDNKFTKEVDSAVFEIHILTNLNDYQRVAFIFSLFD															1253	0.00194769	1	VDNKFNKEWYAASLQICRLPNLNEHQEGAFIVSLSD							0.00219208	0.001		0.049368	0.0571926		0.00299948	0.001		0.001	0.00279459
1254	0.00238416	2	VDNKFTKEVAAAVDEITGLPNLNEYQLDAFVRSLNN															1254	0.00194769	1	VDNKFNKEWYAASLEIISLPNLNGDQGAAFLFSLVD							0.00338416	0.001		0.001	0.001		0.001	0.001		0.001	0.001
1255	0.00238416	2	VDNKFTKEVAYAT															1255	0.00194769	1	VDNKFNKEWYAASAELKRVSAGCLPPQPVR							0.00576832	0.00581951		0.00266786	0.001		0.00299948	0.0203446		0.00294768	0.001
1256	0.00238416	2	VDNKFTKEVFYANSEILSLPNLNVYQIVAFIRSLDN															1256	0.00194769	1	VDNKFNKEWYAASVEILCLPNLNVSQEGAFVHSLAD							0.00219208	0.001		0.001	0.00308121		0.001	0.00293446		0.001	0.001
1257	0.00238416	2	VDNKFTKELRTAISENSRSAELKRVPGGRLRRQPVR															1257	0.00194769	1	VDNKFNKEWYAASYQIARLPNLNGAQGRAFVTSLGD							0.00219208	0.00581951		0.00767145	0.0155685		0.00899792	0.0126068		0.00294768	0.001
1258	0.00238416	2	VDNKFTKELGNAAVEICLLPNLNHLQRIAFLASLCD															1258	0.00194769	1	VDNKFNKEWYYASCEICGLPNLNEPQGSAFVLSLPD							0.00219208	0.001		0.001	0.001		0.001	0.00293446		0.00294768	0.001
1259	0.00238416	2	VDNKFTKELFDASNQIVCLPNLNVSQVLAFVISLGD															1259	0.00194769	1	VDNKFNKEWYYASCQILNLPNLNGAQVNAFVSSLCD							0.00219208	0.001		0.001	0.001		0.001	0.001		0.00684306	0.00817836
1260	0.00238416	2	VDNKF*KNCTMHPIKLIICRT*TGLRYVPSYLACLM															1260	0.00194769	1	VDNKFNKEWYSASSEICRLPNLNRLQQYAFLISLPD							0.001	0.0026065		0.001	0.001		0.00699844	0.00293446		0.001	0.001
1261	0.00238416	2	VDNKFYKEGTSAIVEIPVLPNLNGNQGIAFVGSLFD															1261	0.00194769	1	VDNKFNKEWYNASCEIIALPNLNAPQEGAFVYSLND							0.00219208	0.001		0.00266786	0.001		0.001	0.00293446		0.00294768	0.001
1262	0.00238416	2	VDNKFYKEVTNAIHQIFDLPNLNASQILAFVHSLPD															1262	0.00194769	1	VDNKFNKEWYNATCQILGLPNLNGVQGYAFVRSLCN							0.00219208	0.001		0.001	0.001		0.001	0.001		0.001	0.001
1263	0.00238416	2	VDNKFYKEVIYDPIKFVACRT*TPVREAPSLAACMM															1263	0.00194769	1	VDNKFNKEWYNAIDEIIALPNLNPYQEPAFLPSLID							0.00219208	0.001		0.001	0.001		0.001	0.001		0.00294768	0.001
1264	0.00238416	2	VDNKFYKEVIYDPIKFVACRT*TPVREAPSLAAWAM															1264	0.00194769	1	VDNKFNKEWYNAVSQISNLPNLNDDQGRAFLCSLSD							0.001	0.0026065		0.00767145	0.00308121		0.001	0.001		0.00294768	0.001
1265	0.00238416	2	VDNKFYKEVVSATGEIPNLPNLNGLQGRAFVHSLCN															1265	0.00194769	1	VDNKFNKEWYDAVAQICDLPNLNDAQGCAFVNSLGN							0.001	0.0026065		0.00266786	0.001		0.001	0.00293446		0.001	0.001
1266	0.00238416	2	VDNKFYKEWNTASDQIGFLPNLNPSQKFAFVGSLGD															1266	0.00194769	1	VDNKFNKEWYDAVAQICGLPNLNAYQGDAFVGSLRD							0.00219208	0.001		0.001	0.001		0.00299948	0.001		0.001	0.001
1267	0.00238416	2	VDNKFYKELPSAIFEINLLPNLNRGQGRAFIYSLCN															1267	0.00194769	1	VDNKFNKEWYDAVVQICRLPNLNRLPMQPAR							0.001	0.0026065		0.001	0.001		0.00299948	0.00486892		0.001	0.001
1268	0.00238416	2	VDNKFYKELRDAANLNVYQIVAFIRSLDN															1268	0.00194769	1	VDNKFNKEWYDAVVQICRLPNLNVAQEPAFLRSLVD							0.00219208	0.001		0.0176786	0.011406		0.001	0.00873784		0.001	0.001
1269	0.00238416	2	VDNKFYKELCNASIQIRCLPNLNHSQRDAFLFSLFN															1269	0.00194769	1	VDNKFNKEWYDASIQILNLPNLNRYQESAFVYSLLN							0.00338416	0.001		0.00266786	0.001		0.001	0.001		0.001	0.00458918
1270	0.00238416	2	VDNKFYKEGNYADVQIISLPNLNQNQGGAFIYSLSD															1270	0.00194769	1	VDNKFNKEWYDAVAEILALPN*TASRDLPSSLAWAM							0.00219208	0.001		0.001	0.001		0.001	0.001		0.001	0.001
1271	0.00238416	2	VDNKFYKEGLAANFQIHSLPNLNHNQRSAFIDSLGN															1271	0.00194769	1	VDNKFNKEWYDAVAEILALPN*TASRDLPSFATWVT							0.00338416	0.00421301		0.001	0.001		0.001	0.001		0.001	0.001
1272	0.00238416	2	VDNKFYKEGLNANLQITYLPNLNAAQKGAFIGSLDD															1272	0.00194769	1	VDNKFNKEWYDASVQICNLPNLNLTQEGAFLISLGN							0.00219208	0.001		0.001	0.00308121		0.106972	0.026148		0.001	0.00279459
1273	0.00238416	2	VDNKFYKEGDDAYYEDSHPAELKPGPGVRLRKQPAR															1273	0.00194769	1	VDNKFNKEWYAASREICDLPNLNVNQGHAFLPSLAN							0.00219208	0.001		0.001	0.00308121		0.001	0.001		0.001	0.001
1274	0.00238416	2	VDNKFYKEGGAADCEIGFLPNLNPDQGSAFIDSLVD															1274	0.00194769	1	VDNKFNKEWYAASCQIIHLPNLNGVQGSAFIDSLGD							0.001	0.0026065		0.001	0.001		0.001	0.001		0.001	0.001
1275	0.00238416	2	VDNKFYKEGGSAALQISHLPNLNGSQVRAFVRSLPN															1275	0.00194769	1	VDNKFNKEWYAAIVEICALPNLNGPQMSAFIVSLGN							0.00219208	0.0026065		0.00266786	0.001		0.001	0.001		0.00489537	0.001
1276	0.00238416	2	VDNKFYKEVHSANVEISCLPNLNGYQKIAFVRSLVD															1276	0.00194769	1	VDNKFNKEWYAAAIQICSLPNLNDGQGAAFVPSLSD							0.001	0.00421301		0.00933931	0.00308121		0.001	0.001		0.001	0.00279459
1277	0.00238416	2	VDNKFYKEVLYAFCQISSLPNLNPNQRSAFLSSLRD															1277	0.00194769	1	VDNKFNKEWYAAVSQICGLPNLNGVQESAFLYSLGN							0.001	0.0026065		0.00933931	0.0176497		0.00299948	0.001		0.001	0.001
1278	0.00238416	2	VDNKFYKEVLTAYGEIVPLPNLNECQVGAFVISLVD															1278	0.00194769	1	VDNKFNKEWYAASVQIIGLPNLNPIQEDAFVDSLHD							0.00219208	0.001		0.001	0.00308121		0.001	0.00486892		0.001	0.001
1279	0.00238416	2	VDNKFYKEWHAAIFEIFCLPNLNLDQVRAFVCSLID															1279	0.00194769	1	VDNKFNKEWYAASVQILVLPNLNLAQEYAFVDSLSD							0.00934456	0.00581951		0.001	0.00308121		0.001	0.001		0.001	0.00279459
1280	0.00238416	2	VDNKFYKEWRTADREILGLPNLNAFQEFAFIFSLTN															1280	0.00194769	1	VDNKFNKEWYAAFPEISILPNLNGYQGGAFLASLSD							0.00457624	0.0026065		0.001	0.001		0.001	0.00293446		0.001	0.00279459
1281	0.00238416	2	VDNKFYKEWGTATSQIYRLPNLNAFQEFAFIFSLTN															1281	0.00194769	1	VDNKFNKEWYYATIQIVSLPNLNDGQEDAFLDSLDD							0.00219208	0.001		0.00767145	0.00724363		0.00299948	0.0203446		0.001	0.00458918
1282	0.00238416	2	VDNKFYKEWGTANVEIGNLPNLNGVQKSAFIISLSN															1282	0.00194769	1	VDNKFNKEWYYAICEICGLPNLNGTQGPAFLNSLSN							0.001	0.0026065		0.001	0.001		0.0329917	0.00680338		0.001	0.00279459
1283	0.00238416	2	VDNKFYKEWGYAYFQISSLPNLNGDQESAFVISLYD															1283	0.00194769	1	VDNKFNKEWYYAAHQILTLPNLNQCQEFAFIDSLDD							0.00219208	0.001		0.00266786	0.001		0.00299948	0.001		0.001	0.001
1284	0.00238416	2	VDNKFYKELSYADIQILSLPNLNECQQVAFVPSLID															1284	0.00194769	1	VDNKFNKEWYYASCQILGLPNLNGVQEVAFIGSLSD							0.00219208	0.0026065		0.001	0.001		0.001	0.001		0.001	0.00279459
1285	0.00238416	2	VDNKFYKELYYATLQISHLPNLNLTQVTAFLISLVD															1285	0.00194769	1	VDNKFNKEWYYASAEICAELKRRPGVCLPLQPA*							0.00219208	0.001		0.00767145	0.00308121		0.001	0.001		0.001	0.00279459
1286	0.00238416	2	VDNKFYKELCAAYVEIGSLPNLNLSQKVAFIISLGN															1286	0.00194769	1	VDNKFNKEWYYASVQICTLPNLNGIQGIAFISSLHN							0.12736	0.153618		0.001	0.00308121		0.001	0.00293446		0.001	0.00458918
1287	0.00238416	2	VDNKFYKELCSATLEIHYLPNLNLDQKNAFIFSLDN															1287	0.00194769	1	VDNKFNKEWYYASIEIIGLPNLNDDQMPAFIVSLND							0.00219208	0.001		0.00266786	0.00516242		0.001	0.001		0.001	0.001
1288	0.00238416	2	VDNKFSKEGSYAIIEICALPNLNGVQKCAFIFNLGD															1288	0.00194769	1	VDNKFNKEWYYASAEILCLPNLNLYQQPAFVPSLFD							0.00219208	0.00421301		0.001	0.001		0.001	0.001		0.001	0.00279459
1289	0.00238416	2	VDNKFSKEGDTAAYQICVLPNLNLGQVVAFVGSLDN															1289	0.00194769	1	VDNKFNKEWYYASCEIPSLPNLNDCQQVAFIISLVD							0.001	0.0026065		0.001	0.001		0.001	0.001		0.001	0.001
1290	0.00238416	2	VDNKFSKEGDYAYTEICALPNLNRVQIFAFVRSLAD															1290	0.00194769	1	VDNKFNKEWYSATSEILALPNLNRIQEDASIHSLIN							0.001	0.0026065		2.76798	2.08013		0.001	0.00293446		0.001	0.001
1291	0.00238416	2	VDNKFSKEGVTAYTEIASLPNLNVYQIVAFIRSLDN															1291	0.00194769	1	VDNKFNKEWYSATDEILRLPNLNVYQEGAFVNSLRY							0.001	0.0026065		0.001	0.001		0.001	0.00293446		0.001	0.001
1292	0.00238416	2	VDNKFSKEGYNAAGQIFYLPNLNGHQMLAFIASLLN															1292	0.00194769	1	VDNKFNKEWSNAVIQIISLPNLNVCQECAFIISLGD							0.001	0.0026065		0.00600359	0.00724363		0.001	0.001		0.00294768	0.001
1293	0.00238416	2	VDNKFSKEGYNAAGQIFYLPNLNGAQMSAFIVSLHN															1293	0.00194769	1	VDNKFNKEWSNAVIQIISLPNLNVCQECAFVSSLPD							0.001	0.0026065		0.00767145	0.00308121		0.001	0.001		0.001	0.001
1294	0.00238416	2	VDNKFSKEGYNAAGQIFYLPNLNVYQIVAFIRSLDN															1294	0.00194769	1	VDNKFNKEWSNATRQILALPNLNQPQRNAFVFSLGD							0.001	0.00581951		0.001	0.001		0.001	0.001		0.00294768	0.001
1295	0.00238416	2	VDNKFSKEGSAAVIQIIFLPNLNGCQILAFIVSLVN															1295	0.00194769	1	VDNKFNKEWSNAITQICVLPNLNEVQGGAFVFSLTD							0.00219208	0.001		0.00266786	0.00724363		0.001	0.001		0.00294768	0.001
1296	0.00238416	2	VDNKFSKEVIDAFGEICTLPNLNHYQVAAFICSLID															1296	0.00194769	1	VDNKFNKEWSNAFPEILSLPNLNGVQEHAFVNSLRD							0.00219208	0.00581951		0.00600359	0.001		0.001	0.001		0.00294768	0.001
1297	0.00238416	2	VDNKFSKEVLDAFGEIAALPNLNRTQRHAFVDSLGN															1297	0.00194769	1	VDNKFNKEWSTASSEILSLPNLNGSQGLAFVVSLGD							0.001	0.0026065		0.00600359	0.001		0.001	0.001		0.001	0.001
1298	0.00238416	2	VDNKFSKEVVDATIEIHYLPNLNRDQKCAFIFSLFD															1298	0.00194769	1	VDNKFNKEWSTATAEILALPNLNGYQGVAFVCSLTD							0.00219208	0.001		0.001	0.001		0.001	0.001		0.001	0.001
1299	0.00238416	2	VDNKFSKEVVDATIEIHYLPNLNVYQIVAFIRSLDN															1299	0.00194769	1	VDNKFNKEWSTASIQICGLPNLNVFQESAFVCSLCD							0.001	0.0026065		0.001	0.001		0.001	0.001		0.001	0.001
1300	0.00238416	2	VDNKFSKEVVDAYAQIGNLPNLNVYQIVAFIRSLDN															1300	0.00194769	1	VDNKFNKEWSDATHEILGLPNLNLIQEDAFISSLSN							0.00219208	0.001		0.00266786	0.001		0.001	0.001		0.00294768	0.001
1301	0.00238416	2	VDNKFSKEVCDAIHEIHILPNLNDAQRIAFIFSLFD															1301	0.00194769	1	VDNKFNKEWSDATHEILGLPNLNANQMVAFVPSLDD							0.00219208	0.001		0.012675	0.0238933		0.00299948	0.001		0.001	0.001
1302	0.00238416	2	VDNKFSKEVCDAIHEIHILPNLNDYQRVAFIFSLFD															1302	0.00194769	1	VDNKFNKEWSDATHEILGLPNLNANQMVAFVPSLCD							0.001	0.0026065		0.00266786	0.001		0.001	0.00293446		0.001	0.001
1303	0.00238416	2	VDNKFSKEVCDAIHEIHFLPNLNDAQRIAFIRSLFD															1303	0.00194769	1	VDNKFNKEWSDASIQILLLPNLNQCQENAFVRSLRD							0.00219208	0.001		0.001	0.001		0.00299948	0.001		0.001	0.00638377
1304	0.00238416	2	VDNKFSKEVCDAIHEIHFLPNLNVDQILAFVLSLDN															1304	0.00194769	1	VDNKFNKEWSDAVNQICLLPNLNDVQGHAFISSLSD							0.001	0.0026065		0.00767145	0.0613551		0.001	0.00293446		0.001	0.00279459
1305	0.00238416	2	VDNKFSKEWLSANSEITYLPNLNEDQKSAFVNSLSN															1305	0.00194769	1	VDNKFNKEWSDAVNQICLLPNLNGHQGDAFIISLGN							0.001	0.0026065		0.00266786	0.00308121		0.00299948	0.001		0.001	0.001
1306	0.00238416	2	VDNKFSKEWFDAAYQIALLPNLNPGQKFAFIASLGD															1306	0.00194769	1	VDNKFNKEWSDAVRQITRLPNLNLCQGGAFVNSLDD							0.00219208	0.001		0.001	0.001		0.001	0.001		0.001	0.001
1307	0.00238416	2	VDNKFSKELSDAYNEIHDLPNLNVGQRAAFISSLFD															1307	0.00194769	1	VDNKFNKEWSDASAEILLLPNLNGNQEYAFILSLSN							0.001	0.00742601		0.00266786	0.001		0.0149964	0.0435581		0.001	0.001
1308	0.00238416	2	VDNKFSKELIAAFVQISCLPNLNVVQVNAFLDSLSD															1308	0.00194769	1	VDNKFNKEWSDASIQICTLPNLNLCQEYAFVGSLHN							0.00219208	0.001		0.001	0.001		0.001	0.001		0.001	0.001
1309	0.00238416	2	VDNKFSKELPSADCEICALPNLNQGQVRAFVHSLPD															1309	0.00194769	1	VDNKFNKEWSDASAQIISLPNLNVGQRSAFVGSLSD							0.00219208	0.001		0.00266786	0.001		0.001	0.001		0.001	0.001
1310	0.00238416	2	VDNKFSKELCNANLEIDFLPNLNLSQQSAFVVSLCD															1310	0.00194769	1	VDNKFNKEWSAAI*EICGLPNLNLSQEFAFVLSLGD							0.00219208	0.001		0.0160108	0.011406		0.001	0.0184101		0.00294768	0.001
1311	0.00238416	2	VDNKFSKELCDAIVEIHFLPNLNVDQRHAFIFSLFD															1311	0.00194769	1	VDNKFNKEWSAAICEICGLPNLNLSQEFAFVLSLGD							0.001	0.0026065		0.001	0.001		0.00499896	0.001		0.001	0.001
1312	0.00238416	2	VDNKFSKELCDAIVEIHFLPNLNVYQIVAFIRSLDN															1312	0.00194769	1	VDNKFNKEWSAASNQILGLPNLNLSQGDAFLSSLSN							0.001	0.0026065		0.001	0.001		0.001	0.001		0.001	0.001
1313	0.00238416	2	VDNKFSKEGTDASGQISTLPNLNVDQRSAFVISLSD															1313	0.00194769	1	VDNKFNKEWSAASNQILGLPNLNGGQLGAFLSSLGN							0.00219208	0.001		0.001	0.00516242		0.001	0.00486892		0.001	0.001
1314	0.00238416	2	VDNKFSKEGPAAFGEISYLPNLNQVQLSAFLVSLVD															1314	0.00194769	1	VDNKFNKEWSAASHEIISLPNLNLNQQTAFVNSLSD							0.00219208	0.001		0.001	0.001		0.001	0.001		0.001	0.001
1315	0.00238416	2	VDNKFSKEGSNAYVEIFTLPNLNRGQLAAFLCSLAD															1315	0.00194769	1	VDNKFNKEWSAASYEILHLPNLNGAQGHAFIGSLFD							0.001	0.0026065		0.00433572	0.0134873		0.001	0.001		0.00879074	0.001
1316	0.00238416	2	VDNKFSKEGFYATIQIRYLPNLNAGQVNAFIVSLVN															1316	0.00194769	1	VDNKFNKEWSAATCEILHLPNLNEFQMNAFVDSLPN							0.00219208	0.001		0.001	0.001		0.001	0.00293446		0.001	0.001
1317	0.00238416	2	VDNKFSKEVSDAVSEITDLPNLNRSQECAFILSLAN															1317	0.00194769	1	VDNKFNKEWSAAAREILSLPNLNGGQGGAFLSSLCD							0.001	0.0026065		0.00266786	0.001		0.00499896	0.0300169		0.001	0.001
1318	0.00238416	2	VDNKFSKEVLNAYSEIFLLPNLNVRQITAFVRSLDD															1318	0.00194769	1	VDNKFNKEWSAAVAQIVDLPNLNRIQGCAFVSSLRD							0.00219208	0.001		0.001	0.00308121		0.00499896	0.001		0.001	0.00458918
1319	0.00238416	2	VDNKFSKEVLNAYSEIFLLPNLNVDQILAFVSSLIN															1319	0.00194769	1	VDNKFNKEWSAAVGQISNLPNLNGVQESAFVFSLYD							0.00219208	0.001		0.00266786	0.001		0.001	0.001		0.001	0.00279459
1320	0.00238416	2	VDNKFSKEVLNAYSEIFLLPNLNVDQILAFVLSLHN															1320	0.00194769	1	VDNKFNKEWSAAVDQIAFLPNLNAGQEVAFIDSLDD							0.00576832	0.00581951		0.001	0.00308121		0.00299948	0.001		0.001	0.00279459
1321	0.00238416	2	VDNKFSKEVYTATREIAHLPNLNRIQVVRLPRQPA*															1321	0.00194769	1	VDNKFNKEWSAASNQILGLPNLNESQGGAFIVSLGD							0.00457624	0.001		0.00600359	0.00516242		0.001	0.001		0.001	0.001
1322	0.00238416	2	VDNKFSKEVFNADRQIADLPNLNETQVFAFLFSLLD															1322	0.00194769	1	VDNKFNKEWSAASNQILGLPNLNVNQENAFVYSLAD							0.00338416	0.0026065		0.001	0.001		0.00299948	0.001		0.001	0.00279459
1323	0.00238416	2	VDNKFSKEWADADVQISILPNLNVYQIVAFIRSLDN															1323	0.00194769	1	VDNKFNKEWSYATSQICNLPNLNGVQEPAFIGSLGN							0.001	0.0026065		0.001	0.00308121		0.001	0.00293446		0.001	0.001
1324	0.00238416	2	VDNKFSKEWYDATSQINSLPNLNEHQIGAFITSLHD															1324	0.00194769	1	VDNKFNKEWSYAVSQICGLPNLNAVQGRAFLSSLYD							0.001	0.0026065		0.001	0.001		0.001	0.00293446		0.001	0.001
1325	0.00238416	2	VDNKFSKELSAASSQITNLPNLNRIQVRAFLSSLCD															1325	0.00194769	1	VDNKFNKEWSYAVTQICSLPNLNGSQVPAFIGSLGN							0.00219208	0.001		0.00600359	0.00308121		0.00299948	0.001		0.001	0.001
1326	0.00238416	2	VDNKFSKELIDAVYEIGVLPNLNAVQVFAFLGSLGN															1326	0.00194769	1	VDNKFNKEWSYAVSQICDLPNLNPGQRPAFIGSLSN							0.00457624	0.001		0.001	0.00308121		0.001	0.00486892		0.00294768	0.001
1327	0.00238416	2	VDNKFSKELHTAFLQICRLPNLNRNQIRAFVNSLND															1327	0.00194769	1	VDNKFNKEWSYAVGEILDLPNLNLLQEPAFLVSLGD							1.04049	2.5216		0.001	0.001		0.001	0.001		0.00294768	0.001
1328	0.00238416	2	VDNKFSKELAYASPQIGGLPNLNGFQLHAFIGSLTD															1328	0.00194769	1	VDNKFNKEWSYASSEILNLPNLNEHQGHAFIDSLAN							0.00338416	0.00581951		0.00266786	0.001		0.001	0.001		0.001	0.001
1329	0.00357624	3	VDNKSNKEVCDAYAQIGNLPNLNVYQIVAFIRSLDN															1329	0.00194769	1	VDNKFNKEWSYATNEILGLPNLNECQRCAFVRSLPD							0.001	0.0026065		0.00433572	0.00308121		0.001	0.001		0.001	0.001
1330	0.00357624	3	VDNKFNKEGNSASDEIGGLPNLNAGQKVAFLGSLAD															1330	0.00194769	1	VDNKFNKEWSYATSQICHLPNLNQHQQGAFVVSLDD							0.00219208	0.001		0.001	0.001		0.001	0.001		0.001	0.001
1331	0.00357624	3	VDNKFNKEGGNAVSQIVHLPNLNHCQRGAFLCSLRD															1331	0.00194769	1	VDNKFNKEWSYATCQIINLPNLNHHQVVAFVTSLDD							0.00219208	0.001		0.0410287	0.0301369		0.00499896	0.001		0.00294768	0.001
1332	0.00357624	3	VDNKFNKEGGYANYQIPSLPNLNEFQEAAFVTSLPN															1332	0.00194769	1	VDNKFNKEWSYAVSEILYLPNLNHFQGAAFLGSLVD							0.00219208	0.001		0.001	0.001		0.001	0.001		0.001	0.001
1333	0.00357624	3	VDNKFNKEGVNADSEIVSLPNLNAIQEGAFLISLND															1333	0.00194769	1	VDNKFNKEWSYAVREILCLPNLNVIQEHAFICSLFD							0.00457624	0.00421301		0.00266786	0.001		0.001	0.001		0.001	0.00279459
1334	0.00357624	3	VDNKFNKEVLNAYSEIFLLPNLNVYQIVAFIRSLDN															1334	0.00194769	1	VDNKFNKEWSSAAAEICRLPNLNADQGGAFVSSLPD							0.00219208	0.001		0.001	0.001		0.001	0.001		0.001	0.00458918
1335	0.00357624	3	VDNKFNKEVLNAYSEIFLLPNLNVDQILAFIRSLDN															1335	0.00194769	1	VDNKFNKEWSSAAREILRLPNLNEVQEVAFVVSLPN							0.0069604	0.00421301		0.001	0.00516242		0.001	0.001		0.001	0.001
1336	0.00357624	3	VDNKFNKEVADAISQIAVLPNLNANQLLAFVNSLHD															1336	0.00194769	1	VDNKFNKEWSSASLEILNLPNLNVRQMSAFLPSLGD							0.001	0.0026065		0.00266786	0.001		0.001	0.001		0.001	0.001
1337	0.00357624	3	VDNKFNKEVYDAYAQIGNLPNLNVYQIVAFIRSLDN															1337	0.00194769	1	VDNKFNKEWSSATSEICLLPNLNRAQEDAFISSLDN							0.001	0.0026065		0.00266786	0.001		0.001	0.001		0.001	0.001
1338	0.00357624	3	VDNKFNKEVSSANIQIPVLPNLNADQRSAFVSSLIN															1338	0.00194769	1	VDNKFNKEWSSATAEICRLPNLNQRQGRAFLGSLNN							0.001	0.00421301		0.001	0.00308121		0.001	0.001		0.00294768	0.001
1339	0.00357624	3	VDNKFNKEVCDAYAQIRNLPNLNVYQIVAFIRSLDN															1339	0.00194769	1	VDNKFNKEWSSATNQICNLRT*TSISQTPS*SACMT							0.00457624	0.001		0.001	0.00308121		0.00299948	0.001		0.001	0.00638377
1340	0.00357624	3	VDNKFNKEVCDAYAQIGNLPNLNVYQIVAFIRSLDN															1340	0.00194769	1	VDNKFNKEWSSASVEILGLPNLNPDQQPAFVNSLID							0.00338416	0.001		0.00433572	0.00516242		0.00299948	0.00293446		0.001	0.001
1341	0.00357624	3	VDNKFNKEVCDAYAQIGNLPNLNVYQIVAFIRSLDN															1341	0.00194769	1	VDNKFNKEWSNAATEILHLPNLNGSQEGAFVYSLTN							0.00457624	0.001		0.001	0.00308121		0.00499896	0.001		0.001	0.00279459
1342	0.00357624	3	VDNKFNKEVCDAYAQIGNLPNLNHYQMYAFVFSLPN															1342	0.00194769	1	VDNKFNKEWSNAVVEILGLPNLNLSQGHAFVGSLSD							0.00219208	0.001		0.001	0.001		0.001	0.001		0.001	0.001
1343	0.00357624	3	VDNKFNKEVCDAYAQIGNLPNLNQAQRVAFIVSLRN															1343	0.00194769	1	VDNKFNKEWSNAINQICSLPNLNVGQEVAFVVSLHD							0.00219208	0.001		0.001	0.001		0.001	0.00293446		0.00294768	0.001
1344	0.00357624	3	VDNKFNKEVCDAYAQIGNLPNLNPCQIAAFISSLYD															1344	0.00194769	1	VDNKFNKEWSNAILEICGLPNLNQAEQTAFVHSLHD							0.001	0.00421301		0.001	0.001		0.001	0.001		0.001	0.001
1345	0.00357624	3	VDNKFNKEVCDAYAQIGNLPNLNRGQEPAFVCSLAD															1345	0.00194769	1	VDNKFNKEWSNAITEIVSLPNLNECQGSAFVCSLND							0.001	0.00421301		0.00266786	0.001		0.001	0.00293446		0.00294768	0.001
1346	0.00357624	3	VDNKFNKEVCDAYAQIGNLPNLNLSQRTAFVVSLVD															1346	0.00194769	1	VDNKFNKEWSNAIYEINRLPNLNGSQGVAFVNSLDN							0.001	0.0026065		0.001	0.001		0.00299948	0.001		0.00294768	0.001
1347	0.00357624	3	VDNKFNKEVCDAYAQIGNLPNLNDYQRVAFIFSLFD															1347	0.00194769	1	VDNKFNKEWSNAAIQICGLPNLNLSQGDAFLSSLSN							0.001	0.00421301		0.001	0.00308121		0.001	0.001		0.001	0.00279459
1348	0.00357624	3	VDNKFNKEVCDAYAQIGNLPNLNASQELAFLYSLSD															1348	0.00194769	1	VDNKFNKEWSNAAYEILGLPNLNHVQESAFLPSLPN							0.00338416	0.001		0.001	0.001		0.001	0.001		0.001	0.00458918
1349	0.00357624	3	VDNKFNKEVCDAYAQIGNLPNLNGLQGRAFVHSLCN															1349	0.00194769	1	VDNKFNKEWSNAAYEIARLPNLNGGQEVAFVNSLSN							0.00219208	0.001		0.00600359	0.011406		0.001	0.001		0.00294768	0.001
1350	0.00357624	3	VDNKFNKEVCDAYAQIGNLPNLNVIQMGAFLASLIN															1350	0.00194769	1	VDNKFNKEWSNASVEICNLPNLNECQLIAFIGSLPD							0.00219208	0.001		0.001	0.00308121		0.001	0.001		0.001	0.001
1351	0.00357624	3	VDNKFNKEVCDAYAQIGNLPNLNVVQILAFLASLIN															1351	0.00194769	1	VDNKFNKEWSNASSQILALPNLNRHQGPAFIVSLSD							0.00219208	0.001		0.001	0.00308121		0.001	0.0145412		0.001	0.00817836
1352	0.00357624	3	VDNKFNKEVCDAYAQIGNLPNLNVYQIAAFIRSLDN															1352	0.00194769	1	VDNKFNKEWSTASCQICCLPNLNRCQGGAFIASLPD							0.00219208	0.001		0.00433572	0.001		0.001	0.00293446		0.001	0.001
1353	0.00357624	3	VDNKFNKEVCDAYAQIGNLPNLNVYQIVDFIRSLDN															1353	0.00194769	1	VDNKFNKEWSTASSEISRLPNLNVFQQVAFVDSLVD							0.00219208	0.001		0.00767145	0.00932484		0.00499896	0.00293446		0.001	0.00279459
1354	0.00357624	3	VDNKFNKEVCDAYAQIGNLPNLNVYQIVAFIYSLCN															1354	0.00194769	1	VDNKFNKEWSTASREIIGLPNLNDSQEGAFVDSLDN							0.001	0.0026065		0.001	0.001		0.001	0.00293446		0.001	0.00458918
1355	0.00357624	3	VDNKFNKEVCDAYAQIGNLPNLNVYQIVAFIRSLDN															1355	0.00194769	1	VDNKFNKEWSDASTEICSLPNLNGYQEIAFVGSLHD							0.00219208	0.001		0.00600359	0.001		0.00299948	0.001		0.001	0.001
1356	0.00357624	3	VDNKFNKEVCDAYAQIGNLPNLNVYQIVAFIYSLDD															1356	0.00194769	1	VDNKFNKEWSDASYEILRLPNLNPHQMHAFVVSLPD							0.00219208	0.001		0.001	0.001		0.001	0.001		0.001	0.001
1357	0.00357624	3	VDNKFNKEVCDAYAQIGNLPNLNVYQIVAFIRSLSN															1357	0.00194769	1	VDNKFNKEWSDATRQIITLPNLNVVQVPAFIYSLGD							0.00457624	0.00903252		0.001	0.00308121		0.001	0.00293446		0.001	0.001
1358	0.00357624	3	VDNKFNKEVCDAYAQIGNLPNLNVYQIVAFIRSLGD															1358	0.00194769	1	VDNKFNKEWSDATHEITTLPNLNPDQMPAFVISLDD							0.001	0.0026065		0.001	0.001		0.001	0.001		0.001	0.001
1359	0.00357624	3	VDNKFNKEVCDAYAQIGNLPNLNVYQIVAFIRSLGD															1359	0.00194769	1	VDNKFNKEWSDATDEICRLRT*TASRYLPSQVAWLM							0.001	0.0026065		0.001	0.001		0.001	0.001		0.001	0.001
1360	0.00357624	3	VDNKFNKEVCDAYAQIGNLPNLNVYQIVAFIRSLVN															1360	0.00194769	1	VDNKFNKEWSDAAAEIARLPNLNVDQEGAFLNSLND							0.00457624	0.00581951		0.001	0.001		0.00299948	0.001		0.00294768	0.00279459
1361	0.00357624	3	VDNKFNKEVCDAYAQIGNLPNLNVYQIVAFIRGLDN															1361	0.00194769	1	VDNKFNKEWSDAVCQILCLPNLNGGQRCAFVDSLYN							0.00219208	0.001		0.001	0.001		0.00499896	0.001		0.001	0.00279459
1362	0.00357624	3	VDNKFNKEVCDAYAQIGNLPNLNVYQIVAFVRSLDD															1362	0.00194769	1	VDNKFNKEWSDAVSEILYLPNLNETQGGAFLGSLFD							0.00576832	0.0026065		0.00266786	0.001		0.001	0.001		0.001	0.00458918
1363	0.00357624	3	VDNKFNKEVCDAYAQIGNLPNLNVYQIFAFIRSLDN															1363	0.00194769	1	VDNKFNKEWSDAVVEIVSLPNLNGSQRHAFLPSLDN							0.00219208	0.001		0.001	0.001		0.001	0.00486892		0.001	0.001
1364	0.00357624	3	VDNKFNKEVCDAYAQIGNLPNLNVYQMYAFVCSLLN															1364	0.00194769	1	VDNKFNKEWSAATSQILGLPNLNRGQLVAFLPSLHN							0.00338416	0.013852		0.001	0.001		0.001	0.00486892		0.00294768	0.001
1365	0.00357624	3	VDNKFNKEVCDAYAQIGNLPNLNVCQIVAFIRSLDN															1365	0.00194769	1	VDNKFNKEWSAAINEIDRLPNLNQDQGGAFVFSLSD							0.001	0.0026065		0.00600359	0.0280557		0.001	0.00293446		0.001	0.00458918
1366	0.00357624	3	VDNKFNKEVCDAYAQIGNLPNLNVDQILAFVRSLDN															1366	0.00194769	1	VDNKFNKEWSAAIHQIDNLPNLNGSQGVAFICSLDN							0.00219208	0.001		0.001	0.001		0.001	0.001		0.001	0.001
1367	0.00357624	3	VDNKFNKEVCDAYAQIGNLPNLNVDQILAFVLSLHN															1367	0.00194769	1	VDNKFNKEWSAAIAQICTLPNLNRSQGFAFVRSLVN							0.00219208	0.00581951		0.001	0.00308121		0.001	0.00293446		0.00294768	0.001
1368	0.00357624	3	VDNKFNKEVCDAYAQIGNLPNLNVSQETAFVVSLCN															1368	0.00194769	1	VDNKFNKEWSAAVSEILSLPNLNAGQGVAFVTSLRD							0.00338416	0.0026065		0.001	0.001		0.0229943	0.00293446		0.001	0.00279459
1369	0.00357624	3	VDNKFNKEVCDAYAQIGNLPNLSVYQIVAFIRSLDN															1369	0.00194769	1	VDNKFNKEWSAAICQILSLPNLNDPQMTAFVVSLGD							0.00219208	0.001		0.001	0.001		0.001	0.001		0.001	0.00279459
1370	0.00357624	3	VDNKFNKEVCDAYAQIGNLPDLNVYQIVAFIRSLDN															1370	0.00194769	1	VDNKFNKEWSAAISQICSLPNLNAGQGSAFLRSLGN							0.00219208	0.001		0.001	0.001		0.0229943	0.00680338		0.001	0.001
1371	0.00357624	3	VDNKFNKEVCDAYA*IGNLPNLNVYQIVAFIRSLDN															1371	0.00194769	1	VDNKFNKEWSAAAREICSLPNLNGSQGGAFVNSLVD							0.001	0.0026065		0.001	0.001		0.001	0.00293446		0.001	0.001
1372	0.00357624	3	VDNKFNKEVCDAYAQIGNLPNLNVYQIVAFIRSLDN															1372	0.00194769	1	VDNKFNKEWSAAVSQIIGLPNLNGHQGDAFVRSLTD							0.00219208	0.001		0.00266786	0.001		0.001	0.001		0.00489537	0.001
1373	0.00357624	3	VDNKFNKEVFYANGEIHRLPNLNPFQVHAFLFSLTN															1373	0.00194769	1	VDNKFNKEWSAASIQILFLPNLNGYQMNAFLGSLND							0.001	0.0026065		0.001	0.001		0.00299948	0.001		0.001	0.001
1374	0.00357624	3	VDNKFNKEWHTAFTEIVDLPNSNAVQMYAFVCSLND															1374	0.00194769	1	VDNKFNKEWSAASSQICSLPNLNDSQEFAFVISLTD							0.00219208	0.001		0.001	0.001		0.001	0.001		0.001	0.00279459
1375	0.00357624	3	VDNKFNKELHYAAIQIVLLPNLNEYQRGAFIISLYD															1375	0.00194769	1	VDNKFNKEWSAASSQICSLPNLNDSQEFAFVISLVD							0.001	0.0026065		0.001	0.001		0.00299948	0.001		0.001	0.001
1376	0.00357624	3	VDNKFNKELVDAIFEIFVLPNLNESQVSAFVVSLFD															1376	0.00194769	1	VDNKFNKEWSYATSQICDLPNLNGFQGPAFISSLID							0.001	0.0026065		0.001	0.001		0.001	0.001		0.001	0.00279459
1377	0.00357624	3	VDNKFNKELCDAIVEIHFLPNLNVDQRHAFIFSLFD															1377	0.00194769	1	VDNKFNKEWSYAATQICYLPNLNADQECAFVCSLVD							0.046299	0.0250975		0.001	0.001		0.001	0.00293446		0.00294768	0.001
1378	0.00357624	3	VDNKFNKELFNAAFEIVSLPNLNLSQERAFIISLNN															1378	0.00194769	1	VDNKFNKEWSYAVREICHLPNLNHSQQSAFVNSLGD							0.00338416	0.001		0.00933931	0.00724363		0.00899792	0.0319514		0.001	0.00997296
1379	0.00357624	3	VDNKFNKEGDYAVFQIGGLPNLNVGQGFAFLCSLAD															1379	0.00194769	1	VDNKFNKEWSYAVREIVCLPNLNVCQGSAFLGSLFN							0.00219208	0.001		0.00600359	0.00308121		0.00299948	0.00293446		0.00294768	0.001
1380	0.00357624	3	VDNKFNKEGGAAVAEIRTLPNLNAHQRHAFIYSLYN															1380	0.00194769	1	VDNKFNKEWSYATHQICSLPNLNGDQIYAFVGSLDD							0.00219208	0.001		0.00266786	0.001		0.001	0.001		0.001	0.001
1381	0.00357624	3	VDNKFNKEGFAAYNQIGFLPNLNVFQVGAFVNSLFD															1381	0.00194769	1	VDNKFNKEWSYATCQIVRLPNLNVHQGSAFIGSLPD							0.001	0.0026065		0.001	0.00308121		0.001	0.001		0.001	0.001
1382	0.00357624	3	VDNKFNKEWLAASTEIACLPNLNHSQLLAFIYSLVD															1382	0.00194769	1	VDNKFNKEWSYAIRQIIALPNLNETQGFAFVDSLAD							0.001	0.0026065		0.00266786	0.001		0.001	0.001		0.001	0.00279459
1383	0.00357624	3	VDNKFNKEWYYAATEIVSLPNLNDIQIFAFIVSLCD															1383	0.00194769	1	VDNKFNKEWSYAIREIVALPNLNAGQEYAFLGSLVN							0.00219208	0.001		0.00266786	0.001		0.001	0.00293446		0.00294768	0.001
1384	0.00357624	3	VDNKFNKELITANCEISYLPNLNDCQRGAFISSLFD															1384	0.00194769	1	VDNKFNKEWSYAVDQIVCLPNLNRNQMCAFVGSLGD							0.00219208	0.001		0.00433572	0.001		0.001	0.00293446		0.00684306	0.00279459
1385	0.00357624	3	VDNKFTKEGHSAAIEIFILPNLNGCQRIAFINSLVD															1385	0.00194769	1	VDNKFNKEWSYASHQICRLPNLNVCQGSAFVSSLVD							0.00219208	0.001		0.00600359	0.00724363		0.001	0.00293446		0.001	0.001
1386	0.00357624	3	VDNKFTKEVFNAYPEITYLPNLNAVQMSAFLFSLRD															1386	0.00194769	1	VDNKFNKEWSYASREIARLPNLNEIQGSAFISSLGD							0.001	0.0026065		0.001	0.001		0.001	0.00293446		0.001	0.001
1387	0.00357624	3	VDNKFTKEWIDAFSQILTLPNLNLGQEIAFISSLLD															1387	0.00194769	1	VDNKFNKEWSYASVEILNLPNLNPPQEGAFVHSLCD							0.001	0.0026065		0.00266786	0.001		0.001	0.001		0.00294768	0.001
1388	0.00357624	3	VDNKFTKEWCYASHEISFLPNLNDNQKYAFVYSLFN															1388	0.00194769	1	VDNKFNKEWSSAITQICALPNLNGIQRNAFVISLPN							0.001	0.00421301		0.00433572	0.0155685		0.001	0.00293446		0.001	0.00279459
1389	0.00357624	3	VDNKFTKEGSAAFYEILALPNLNHGQRRAFIYSLVD															1389	0.00194769	1	VDNKFNKEWSSAYGEITFLPNLNGPQVPAFIYSLLN							0.00219208	0.001		0.001	0.001		0.001	0.001		0.001	0.001
1390	0.00357624	3	VDNKFTKEGVDATYEIVDLPNLNPLQLFAFLDSLGN															1390	0.00194769	1	VDNKFNKEWSSASFQILGLPNLNECQGHAFVCSLYD							0.001	0.0026065		0.001	0.001		0.00299948	0.001		0.00294768	0.001
1391	0.00357624	3	VDNKFTKEVIAATRQICILPNLNVNQLFAFVPSLAD															1391	0.00194769	1	VDNKFNKEWCNATVQICGLPNLNESQESAFVDSLDN							0.00219208	0.001		0.00266786	0.001		0.001	0.001		0.001	0.00279459
1392	0.00357624	3	VDNKFTKEVRDASIEIDTLPNLNVYQRYAFVNSLGN															1392	0.00194769	1	VDNKFNKEWCNAVHEICSLPNLNGFQECAFVCSLDD							0.001	0.0026065		0.001	0.001		0.001	0.001		0.00879074	0.00279459
1393	0.00357624	3	VDNKFTKEVSSANIQIPVLPNLNADQRSAFVSSLIN															1393	0.00194769	1	VDNKFNKEWCNAVNEIFGLPNLNLLQRPAFVDSLVD							0.001	0.0026065		0.001	0.001		0.001	0.001		0.001	0.001
1394	0.00357624	3	VDNKFYKEVIYDPIKFVACRT*TPVREAPSLAA*VT															1394	0.00194769	1	VDNKFNKEWCNAVSEICNLPNLNGTQGCAFVGSLDD							0.00219208	0.001		0.00266786	0.00516242		0.00299948	0.001		0.001	0.001
1395	0.00357624	3	VDNKFYKEVCDAYAQIGNLPNLNVYQIVAFIRSLDN															1395	0.00194769	1	VDNKFNKEWCNATFEILRLPNLNVNQESAFLDSLVN							0.00219208	0.0026065		0.001	0.001		0.001	0.001		0.001	0.001
1396	0.00357624	3	VDNKFYKEWDNAVFEIGCLPNLNGYQVDAFLGSLFD															1396	0.00194769	1	VDNKFNKEWCNAVRQICNCRT*TGVRWAPSQTA*LM							0.001	0.0026065		0.001	0.00308121		0.001	0.00486892		0.001	0.001
1397	0.00357624	3	VDNKFYKEWGTASDEIRDLPNLNGPQERAFVINLSD															1397	0.00194769	1	VDNKFNKEWCNAVSEILGLPNLNVGQGGAFIGSLGD							0.001	0.00421301		0.001	0.001		0.001	0.001		0.00294768	0.00279459
1398	0.00357624	3	VDNKFYKELCDAFFEIYRLPNLNRCQLGAFVDSLFD															1398	0.00194769	1	VDNKFNKEWCNASHEILILPNLNHGQGDAFVSSLDN							0.001	0.00421301					0.001	0.001		0.001	0.00458918
1399	0.00357624	3	VDNKFYKEGRNAYVEIVFLPNLNANQKSAFINSLSN															1399	0.00194769	1	VDNKFNKEWCTATLEICRLPNLNAGQGFAFITSLGD							0.00219208	0.00742601					0.00499896	0.00486892		0.001	0.001
1400	0.00357624	3	VDNKFYKEVGTADLEISYLPNLNARQVDAFLGSLCN															1400	0.00194769	1	VDNKFNKEWCTAVIEILRLPNLNETQETAFVLSLYD							0.00219208	0.001					0.001	0.001		0.001	0.00279459
1401	0.00357624	3	VDNKFYKEVYTAFSQIIDLPNLNLSQRIAFIFSLYD															1401	0.00194769	1	VDNKFNKEWCTAVIEILRLPNLNVSQGSAFLSSLPD							0.001	0.0026065					0.00499896	0.00293446		0.001	0.00279459
1402	0.00357624	3	VDNKFYKEWCTAFYEISSLPNLNHVQRSAFVTSLGD															1402	0.00194769	1	VDNKFNKEWCTAVAQILRLPNLNGDQEGAFVSSLVD							0.00219208	0.001					0.001	0.00293446		0.001	0.001
1403	0.00357624	3	VDNKFYKELLDAYIEITHLPNLNPDQVFAFLVSLNN															1403	0.00194769	1	VDNKFNKEWCDAVDEILCLPNLNGYQGPAFIFSLGD							0.001	0.0026065					0.001	0.001		0.001	0.001
1404	0.00357624	3	VDNKFSKEVCDAYAQISILPNLNAHQVIAFLGSLIN															1404	0.00194769	1	VDNKFNKEWCDASRQICALPNLNEPQRYAFVGSLGD							0.001	0.0026065					0.001	0.001		0.001	0.001
1405	0.00357624	3	VDNKFSKELISAIIEISFLPNLNGGQMGAFICSLYD															1405	0.00194769	1	VDNKFNKEWCDATVQIVDLPNLNQSQGRAFLGSLVN							0.00219208	0.001					0.00299948	0.001		0.00294768	0.001
1406	0.00357624	3	VDNKFSKELHDAALEIHALPNLNAGQVSAFLSSLPD															1406	0.00194769	1	VDNKFNKEWCDAAYQILSLPNLNGTQVDAFVCSLSN							0.001	0.0026065					0.001	0.00293446		0.001	0.001
1407	0.00357624	3	VDNKFSKELDNAFFEIIGLPNLNVGQMAAFLISLGD															1407	0.00194769	1	VDNKFNKEWCDAVREICALPNLNHAQECAFIGSLPD							0.00219208	0.001					0.001	0.00486892		0.001	0.001
1408	0.00357624	3	VDNKFSKEGRAADAEIVCLPNLNQCQVRAFLDSLSD															1408	0.00194769	1	VDNKFNKEWCAAARQILLLPNLNVVQGYAFVTSLDN							0.00219208	0.001					0.001	0.001		0.001	0.001
1409	0.00357624	3	VDNKFSKEVSSAVLEIASLPNLNDYQQAAFIPSLSD															1409	0.00194769	1	VDNKFNKEWCAAVFQISRLPNLNDDQMGAFVDSLPN							0.00576832	0.001					0.001	0.00293446		0.001	0.001
1410	0.00357624	3	VDNKFSKEVDNAIDEIDPLPNLNGGQGNAFVGSLCD															1410	0.00194769	1	VDNKFNKEWCAAVYEILDLPNLNGGQGSAFLCSLPD							0.00338416	0.0026065					0.001	0.00293446		0.001	0.00279459
1411	0.00357624	3	VDNKFSKEVAAAVDEITGLPNLNEYQLDAFVRSLNN															1411	0.00194769	1	VDNKFNKEWCAATAQILHLPNLNLCQMYAFDCSLVD							0.0689485	0.0283106					0.001	0.00293446		0.00294768	0.001
1412	0.00357624	3	VDNKFSKELRNAVSQINYLPNLNGLQEPAFLRSLDN															1412	0.00194769	1	VDNKFNKEWCAAASQILVLPNLNVCQEGAFISSLVD							0.00219208	0.001					0.001	0.001		0.001	0.001
1413	0.00476832	4	VDNKFNKEGADAILQIGNLPNLNVRQITAFVRSLDD															1413	0.00194769	1	VDNKFNKEWCAASNEILRLPNLNAAQGDAFIHSLSD							0.001	0.00421301					0.00499896	0.001		0.001	0.001
1414	0.00476832	4	VDNKFNKEVCDAYAQIGNLPNLNVYQIVAFIRSLDN															1414	0.00194769	1	VDNKFNKEWCAASSEIVCQTRTR*TPSSLA*MT							0.0117287	0.0026065					0.001	0.00293446		0.001	0.001
1415	0.00476832	4	VDNKFNKEVSTAFVEIFVLPNLNQCQGVAFLSSLRN															1415	0.00194769	1	VDNKFNKEWCAAFFEILSLPNLNHTQESAFVSSLAD							0.00219208	0.001					0.001	0.00293446		0.001	0.001
1416	0.00476832	4	VDNKFNKEVCDTYAQIGNLPNLNVYQIVAFIRSLDN															1416	0.00194769	1	VDNKFNKEWCYAVDQIIALPNLNDPQECAFLCSLFD							0.001	0.0026065					0.00299948	0.001		0.001	0.001
1417	0.00476832	4	VDNKFNKEVCDAYAQIGNLPNLNVYQIVAFIRSLDN															1417	0.00194769	1	VDNKFNKEWCYASSQICRLPNLNGSQKGAFLISLHD							0.001	0.0026065					0.001	0.001		0.00294768	0.001
1418	0.00476832	4	VDNKFNKEVCDAYAQIGNLPN*NVYQIVAFIRSLDN															1418	0.00194769	1	VDNKFNKEWCYASCQICRLPNLNDSQGGAFITSLSD							0.0999426	0.0861447					0.001	0.001		0.001	0.001
1419	0.00476832	4	VDNKFNKEVCDAYAQIGNLPNLNQHQRYAFLCSLHN															1419	0.00194769	1	VDNKFNKEWCYAILQILSLPNLNQCQVPAFINSLDN							0.001	0.0026065					0.001	0.00873784		0.00294768	0.001
1420	0.00476832	4	VDNKFNKEVCDAYAQIGNLPNLNPSQRLAFIFSLFD															1420	0.00194769	1	VDNKFNKEWCYAAGQIVLLPNLNESQEAAFLGSLPD							0.00815248	0.00742601					0.001	0.001		0.00294768	0.001
1421	0.00476832	4	VDNKFNKEVCDAYAQIGNLPNLNVYQIVAFIRSLDN															1421	0.00194769	1	VDNKFNKEWCYAVREIARLPNLNDYQENAFVHSLAD							0.001	0.0026065					0.001	0.00486892		0.00294768	0.001
1422	0.00476832	4	VDNKFNKEVCDAYAQIGNLPNLNVGQRAAFISSLYD															1422	0.00194769	1	VDNKFNKEWCYASAQICLLPNLNGVQGDAFVPSLGD							0.001	0.00581951					0.001	0.001		0.001	0.001
1423	0.00476832	4	VDNKFNKEVCDAYAQIGNLPNLNVYQIVAFIRSLDN															1423	0.00194769	1	VDNKFNKEWCYASVQILRLPNLNRPQVAAFIDSLSD							0.001	0.00421301					0.001	0.00486892		0.001	0.001
1424	0.00476832	4	VDNKFNKEVCDAYAQIGNLPNLNVYQITAFVRSLDD															1424	0.00194769	1	VDNKFNKEWCYASREILVLPNLNGSQMDAFINSPCN							0.00219208	0.001					0.001	0.001		0.001	0.001
1425	0.00476832	4	VDNKFNKEVCDAYAQIGNLPNLNVYQILAFVLSLDN															1425	0.00194769	1	VDNKFNKEWCYASLQIVSLPNLNVFQQDAFILSLGD							0.001	0.00421301					0.001	0.001		0.001	0.00279459
1426	0.00476832	4	VDNKFNKEVCDAYAQIGNLPNLNVYQIVTFIRSLDN															1426	0.00194769	1	VDNKFNKEWCSATSQIVCLPNLNVGQKVAFVPSLCN							0.00576832	0.00581951					0.001	0.001		0.001	0.001
1427	0.00476832	4	VDNKFNKEVCDAYAQIGNLPNLNVYQIVAFIFSLFD															1427	0.00194769	1	VDNKFNKEWCSAVVEILSLPNLNDGQGGAFVGSLFD							0.001	0.00421301					0.001	0.0106723		0.00294768	0.001
1428	0.00476832	4	VDNKFNKEVCDAYAQIGNLPNLNVYQIVAFIRSLIN															1428	0.00194769	1	VDNKFNKEWCSAVVEILSLPNLNDGQGGAFVCSLCD							0.00219208	0.001					0.001	0.00486892		0.00294768	0.00638377
1429	0.00476832	4	VDNKFNKEVCDAYAQIGNLPNLNVYQIVAFIRSLVN															1429	0.00194769	1	VDNKFNKEWCNATCEICRLPNLNGIQESAFIFSLTD							0.001	0.0026065					0.00299948	0.00293446		0.00294768	0.001
1430	0.00476832	4	VDNKFNKEVCDAYAQIGNLPNLNVYQIVAFIRSLYN															1430	0.00194769	1	VDNKFNKEWCNATDEILCLPNLNRNQGVAFISSLHN							0.00219208	0.001					0.001	0.00486892		0.001	0.00279459
1431	0.00476832	4	VDNKFNKEVCDAYAQIGNLPNLNVYQIVAFIRSLFD															1431	0.00194769	1	VDNKFNKEWCNAIAEICSLPNLNDVQGNAFVVSLGN							0.001	0.0026065					0.001	0.001		0.001	0.001
1432	0.00476832	4	VDNKFNKEVCDAYAQIGNLPNLNVYQIVAFIGSLPN															1432	0.00194769	1	VDNKFNKEWCNAVDEIVSLPNLNPNQLIAFVGSLGD							0.001	0.0026065					0.001	0.00293446		0.00294768	0.001
1433	0.00476832	4	VDNKFNKEVCDAYAQIGNLPNLNVYQIVAFICSLDN															1433	0.00194769	1	VDNKFNKEWCNASDEIIALPNLNRCQGGAFIVSLRN							0.00219208	0.001					0.001	0.001		0.001	0.001
1434	0.00476832	4	VDNKFNKEVCDAYAQIGNLPNLNVYQIVAFVRSLDN															1434	0.00194769	1	VDNKFNKEWCNASIEILCLPNLNAFQEGAFIRSLGD							0.001	0.0026065					0.11497	0.747702		0.001	0.001
1435	0.00476832	4	VDNKFNKEVCDAYAQIGNLPNLNVYQIVAFVLSLAD															1435	0.00194769	1	VDNKFNKEWCNATIQILGLPNLNHPQMYAFVGSLGN							0.001	0.0026065					0.00299948	0.00486892		0.001	0.001
1436	0.00476832	4	VDNKFNKEVCDAYAQIGNLPNLNVYQMFAFIRSLDN															1436	0.00194769	1	VDNKFNKEWCNATCQILGLPNLNRRQGSAFVSSLPD							0.001	0.0026065					0.001	0.00293446		0.001	0.001
1437	0.00476832	4	VDNKFNKEVCDAYAQIGNLPNLNVYQIVAFIRSLDN															1437	0.00194769	1	VDNKFNKEWCNAIDQIARLPNLNQHQGPAFVFSLSD							0.00338416	0.001					0.001	0.00293446		0.001	0.001
1438	0.00476832	4	VDNKFNKEVCDAYAQIGNLPNLDVYQIVAFIRSLDN															1438	0.00194769	1	VDNKFNKEWCNAICEILALPNLNGVQECAFIGSLSD							0.00219208	0.001					0.00299948	0.001		0.00294768	0.001
1439	0.00476832	4	VDNKFNKEVCDAYAQIGNLPNLNVYQIVAFIRSLDN															1439	0.00194769	1	VDNKFNKEWCNAIAQILSLPNLNEIQVDAFVHSLAD							0.00457624	0.00903252					0.00299948	0.00486892		0.001	0.00279459
1440	0.00476832	4	VDNKFNKEVCDAYAQIGDLPNLNVYQIVAFIRSLDN															1440	0.00194769	1	VDNKFNKEWCNAAREICSLPNLNHIQGFAFIASLGD							0.001	0.00421301					0.001	0.001		0.001	0.00279459
1441	0.00476832	4	VDNKFNKEVCDAYARIGNLPNLNVYQIVAFIRSLDN															1441	0.00194769	1	VDNKFNKEWCNAAREICCLPNLNDFQGLAFIGSLID							0.001	0.0026065					0.001	0.001		0.001	0.00279459
1442	0.00476832	4	VDNKFNKEVCVAYAQIGNLPNLNVYQIVAFIRSLDN															1442	0.00194769	1	VDNKFNKEWCNAASEILLLPNLNGLQVGAFICSLSD							0.00219208	0.001					0.001	0.001		0.00294768	0.001
1443	0.00476832	4	VDNKFNKEWRTAYFEITGLPNLNHDQRLAFLASLHD															1443	0.00194769	1	VDNKFNKEWCNAASEILLLPNLNGVQEPAFVRSLID							0.00219208	0.001					0.001	0.001		0.001	0.001
1444	0.00476832	4	VDNKFNKEVCDAYAQIGNLPNLNVYQIVAFIRSLDN															1444	0.00194769	1	VDNKFNKEWCNAVSEIHRLPNLNLFQRPAFLRSLSD							0.0129208	0.0122455					0.001	0.00293446		0.001	0.001
1445	0.00476832	4	VDNKFNKGVCDAYAQIGNLPNLNVYQIVAFIRSLDN															1445	0.00194769	1	VDNKFNKEWCNAVDEILSLPNLNVSQGGAFLCSLGN							0.00219208	0.00421301					0.00899792	0.00680338		0.001	0.001
1446	0.00476832	4	VDNKFNKEVSDAIGQIIYLPNLNRGQGDAFVSSLYN															1446	0.00194769	1	VDNKFNKEWCNASFQILSLPNLNRLQGNAFVCSLGN							0.00219208	0.00581951					0.00299948	0.001		0.001	0.001
1447	0.00476832	4	VDNKFNKEVLSASIEIARLPNLNARQEFAFVDSLGN															1447	0.00194769	1	VDNKFNKEWCNASVEILSLPNLNALQRPAFIASLGN							0.001	0.0026065					0.001	0.00293446		0.00294768	0.001
1448	0.00476832	4	VDNKFTKELISAICQINSLPNLNAYQECAFIASLVD															1448	0.00194769	1	VDNKFNKEWCNASYEISLLPNLNEPQELAFVISLSD							0.00219208	0.001					0.00699844	0.0145412		0.001	0.001
1449	0.00476832	4	VDNKFYKEVFTANGQIGPLPNLNASQRSAFVFSLHN															1449	0.00194769	1	VDNKFNKEWCTAADQILVLPNLNVGQGLAFVDSLRD							0.001	0.0026065					0.001	0.00293446		0.001	0.001
1450	0.00476832	4	VDNKFSKEVRYATAEILPLPNLNAYQVVAFLFSLHN															1450	0.00194769	1	VDNKFNKEWCTAVDQIISLPNLNVYQGCAFIGSLGN							0.00338416	0.001					0.001	0.00293446		0.001	0.001
1451	0.00476832	4	VDNKFSKEVCDAIHEIHFLPNLNDAQRIAFIFSLHN															1451	0.00194769	1	VDNKFNKEWCTAVAQILCLPNLNVTQEGAFVNSLDD							0.001	0.00421301					0.001	0.00293446		0.001	0.00279459
1452	0.00476832	4	VDNKFSKELVSASCEICILPNLNRSQKGAFISSLVD															1452	0.00194769	1	VDNKFNKEWCTAVGQILALPNLNVSQGGAFVCSLGN							0.001	0.0026065					0.001	0.00293446		0.001	0.00458918
1453	0.00476832	4	VDNKFSKEGIDADREIRSLPNLNESQGCAFVTSLYD															1453	0.00194769	1	VDNKFNKEWCTASDQICGLPNLNGFQQGAFVGSLGD							0.00338416	0.001					0.001	0.001		0.001	0.00279459
1454	0.00476832	4	VDNKFSKEVLNAYSEIFLLPNLNVDQILAFIRSLHN															1454	0.00194769	1	VDNKFNKEWCTASVQIINLPNLNGVQESAFLRSLGD							0.00219208	0.00581951					0.00299948	0.001		0.001	0.001
1455	0.00476832	4	VDNKFSKEVLNAYSEIFLLPNLNVDQILAFVRSLDN															1455	0.00194769	1	VDNKFNKEWCDATAEILGLPNLNVHQGGAFLYSLCD							0.00219208	0.001					0.00699844	0.0203446		0.001	0.001
1456	0.00476832	4	VDNKFSKEVLNAYSEIFLLPNLNVDQIVAFIRSLDN															1456	0.00194769	1	VDNKFNKEWCDAIREILILPNLNESQMSAFLPSLSD							0.00219208	0.001					0.001	0.00293446		0.001	0.001
1457	0.00476832	4	VDNKFSKELYDAIVQITFLPNLNVDQIAAFLISLGD															1457	0.00194769	1	VDNKFNKEWCDAISEILVLPNLNGRQGDAFLCSLLN							0.001	0.0026065					0.0129969	0.0880507		0.001	0.00279459
1458	0.0059604	5	VDNKFNKEVVDATIEIHYLPNLNRDQKCAFIFSLFD															1458	0.00194769	1	VDNKFNKEWCDATREICCLPNLNLLQGGAFIYSLGD							0.00219208	0.001					0.00299948	0.001		0.001	0.001
1459	0.0059604	5	VDNKFNKEVCDAYAQIGNMPNLNVYQIVAFIRSLDN															1459	0.00194769	1	VDNKFNKEWCDATCQILDLPNLNERQGCAFVCSLSD							0.00219208	0.0026065					0.001	0.001		0.001	0.001
1460	0.0059604	5	VDNKFNKEVCDAYAQIGNLPNLNVYQIVAFIRSLDN															1460	0.00194769	1	VDNKFNKEWCDAIFEILTLPNLNLTQVPAFVNSLGN							0.001	0.0026065					0.001	0.001		0.00294768	0.001
1461	0.0059604	5	VDNKFNKEVCDAYAQIGNLPNLNIYQIVAFIRSLDN															1461	0.00194769	1	VDNKFNKEWCDAVDEILSLPNLNPGQEGAFIVSLHD							0.00219208	0.001					0.001	0.001		0.00294768	0.001
1462	0.0059604	5	VDNKFNKEVCDAYAQIGNLPNLNLDQKNAFIFSLDD															1462	0.00194769	1	VDNKFNKEWCDAVYQILNLPNLNPCQRPAFVPSLNN							0.00219208	0.001					0.001	0.001		0.001	0.001
1463	0.0059604	5	VDNKFNKEVCDAYAQIGNLPNLNAHQVIAFLGSLIN															1463	0.00194769	1	VDNKFNKEWCDAVSEILRLPNLNQDQGGAFLVSLGD							0.00219208	0.001					0.001	0.001		0.001	0.001
1464	0.0059604	5	VDNKFNKEVCDAYAQIGNLPNLNVYQRVAFIFSLFD															1464	0.00194769	1	VDNKFNKEWCDAVSEILRLPNLNGGR*MPSLVACVT							0.0105366	0.0122455					0.001	0.00293446		0.001	0.001
1465	0.0059604	5	VDNKFNKEVCDAYAQIGNLPNLNVYQILAFIRSLDN															1465	0.00194769	1	VDNKFNKEWCDASIQIAALPNLNLLQGGAFIGSLRD							0.00815248	0.00581951					0.001	0.00293446		0.001	0.00279459
1466	0.0059604	5	VDNKFNKEVCDAYAQIGNLPNLNVYQIVAFIHSLDN															1466	0.00194769	1	VDNKFNKEWCDASDQICSLPNLNAIQVVAFIPSLRN							0.001	0.0026065					0.001	0.001		0.001	0.001
1467	0.0059604	5	VDNKFNKEVCDAYAQIGNLPNLNVYQIVAFIRSLHN															1467	0.00194769	1	VDNKFNKEWCDASSQIIHLPNLNACQESAFVCSLDN							0.001	0.0026065					0.001	0.001		0.001	0.00279459
1468	0.0059604	5	VDNKFNKEVCDAYAQIGNLPNLNVYQIVAFIRSLGN															1468	0.00194769	1	VDNKFNKEWCDASSQIINLPNLNGGQEGAFVSSLYD							0.00338416	0.001					0.001	0.001		0.001	0.001
1469	0.0059604	5	VDNKFNKEVCDAYAQIGNLPNLNVYQIVAFIRSLYD															1469	0.00194769	1	VDNKFNKEWCAATIQILFLPNLNAPQELAFLDSLVN							0.00219208	0.001					0.00299948	0.001		0.00294768	0.001
1470	0.0059604	5	VDNKFNKEVCDAYAQIGNLPNLNVYQIVAFLVSLCD															1470	0.00194769	1	VDNKFNKEWCAATIQILFLPNLNVAQEVAFLPSLYD							0.001	0.0026065					0.00299948	0.001		0.001	0.001
1471	0.0059604	5	VDNKFNKEVCDAYAQIGNLPNLNVYQIVAFIRSLDN															1471	0.00194769	1	VDNKFNKEWCAATNQILSLPNLNGCQGIAFVRSLVN							0.00576832	0.001					0.001	0.00293446		0.001	0.001
1472	0.0059604	5	VDNKFNKEVCDAYAQVGNLPNLNVYQIVAFIRSLDN															1472	0.00194769	1	VDNKFNKEWCAAANQILNLPNLNLLQGCAFVHSLAD							0.00219208	0.0026065					0.001	0.001		0.001	0.001
1473	0.0059604	5	VDNKFNKEVCDAYAQIGNLPNLNVYQIVAFIRSLDN															1473	0.00194769	1	VDNKFNKEWCAAISEICVLPNLNRSQERAFVPSLDN							0.001	0.0026065					0.001	0.001		0.00294768	0.001
1474	0.0059604	5	VDNKFNKEVCGAYAQIGNLPNLNVYQIVAFIRSLDN															1474	0.00194769	1	VDNKFNKEWCAAAAEIASLPNLNDGQGAAFVTSLDN							0.001	0.0026065					0.001	0.001		0.00294768	0.001
1475	0.0059604	5	VDNKFNREVCDAYAQIGNLPNLNVYQIVAFIRSLDN															1475	0.00194769	1	VDNKFNKEWCAAADEILSLPNLNVFQGNAFISSLDD							0.001	0.0026065					0.001	0.00293446		0.001	0.001
1476	0.0059604	5	VDNKFNEEVCDAYAQIGNLPNLNVYQIVAFIRSLDN															1476	0.00194769	1	VDNKFNKEWCAASSEILALPNLNVHQEDAFIISLFN							0.00219208	0.001					0.001	0.00293446		0.00294768	0.001
1477	0.0059604	5	VDNKFNKEGADAILQIGNLPNLNVRQITAFVRSLHN															1477	0.00194769	1	VDNKFNKEWCAASSEILALPNLNVHQEDAFIIGLFN							0.001	0.0026065					0.001	0.001		0.001	0.00458918
1478	0.0059604	5	VDNKFTKELSTAVSQIIGLPNLNRYQVFAFVSSLTN															1478	0.00194769	1	VDNKFNKEWCAASVEILNLPPRPETCLHWQPGR							0.001	0.00421301					0.001	0.001		0.001	0.00458918
1479	0.0059604	5	VDNKFSKEVCDAYAQIGNLPNLNVYQIVAFIRSLDN															1479	0.00194769	1	VDNKFNKEWCAASGEILRLPNLNGVQLGAFVGSLSD							0.00219208	0.001					0.0169958	0.00293446		0.001	0.00458918
1480	0.0059604	5	VDNKFYKEVGDAVSEIDCLPNLNRRQRNAFVVSLDD															1480	0.00194769	1	VDNKFNKEWCAASVQIAALPNLNRLQGNAFINSLFD							0.00219208	0.001					0.001	0.001		0.001	0.001
1481	0.0059604	5	VDNKFYKEWCSASSEIRSAELKRESAACLR*QPA*															1481	0.00194769	1	VDNKFNKEWCYAIFQICSLPNLNGDQMCAFVSSLDN							0.00219208	0.001					0.001	0.00293446		0.00879074	0.00279459
1482	0.0059604	5	VDNKFYKELSTATREISYLPNLNGNQMTAFVNSLCN															1482	0.00194769	1	VDNKFNKEWCYASNQILCLQLKRESGTRLPWQPDR							0.00219208	0.001					0.00299948	0.00680338		0.001	0.001
1483	0.0059604	5	VDNKFYKELYAAFGEISYLPNLNQVQLSAFLVSLVD															1483	0.00194769	1	VDNKFNKEWCYASNEILLLPNLNLGQRPAFVSSLGN							0.00219208	0.001					0.00499896	0.001		0.001	0.001
[truncated: 149,936 more rows]

## Sheet: Figure 4
4b	Lux fold change for all binders					4c	Fold change specificity
			Affibody	Affitin
[truncated: 59 more rows]

## Sheet: Figure 5
5b	Fold change lux new binders
[truncated: 26 more rows]

[truncated: 9 more sheets: Figure 6, Ext. Data Fig 1, Ext. Data Fig 2, Ext. Data Fig 3, Ext. Data Fig 4, Ext. Data Fig 5, Ext. Data Fig 6, Ext. Data Fig 7, Ext. Data Fig 8]
